# Supplementary material for: A New Alternative Synthesis of Salicylaldazine via Microwave Irradiation Method
Source: Hindawi journal article supplement (doi:10.1155/2019/9546373), 2019-05-13
Supplement: f1 [file 9546373.f1.zip]

Archive with 3 entries (2 files):
- Supplementary Materials/
- Supplementary Materials/HLb CRYSTAL.cif
- Supplementary Materials/mat.9546373.v2.pdf
