# Supplementary material for: A New Alternative Synthesis of Salicylaldazine via Microwave Irradiation Method
Source: Hindawi journal article supplement (doi:10.1155/2019/9546373), 2019-05-13
Supplement: f1 [file 9546373.f1.zip › Supplementary Materials/HLb CRYSTAL.cif]

data_hlb
_audit_creation_date              2018-10-15
_audit_creation_method
;
Olex2 1.2
(compiled 2017.08.10 svn.r3458 for OlexSys, GUI svn.r5381)
;
_shelxl_version_number            2013-3
_publ_contact_author_address      ?
_publ_contact_author_email        ?
_publ_contact_author_id_orcid     ?
_publ_contact_author_name         ''
_publ_contact_author_phone        ?
_publ_section_references
;
Dolomanov, O.V., Bourhis, L.J., Gildea, R.J, Howard, J.A.K. & Puschmann, H.
 (2009), J. Appl. Cryst. 42, 339-341.

Sheldrick, G.M. (2008). Acta Cryst. A64, 112-122.
;
_chemical_name_common             ?
_chemical_name_systematic
;
Preparation of 5,5?-dimethoxy-2,2?-{[(E,E)-hydrazine-1,2-diylidene]
       bis(methanylidene)}diphenol
;
_chemical_formula_moiety          'C16 H16 N2 O4'
_chemical_formula_sum             'C16 H16 N2 O4'
_chemical_formula_weight          300.31
_chemical_melting_point           ?
loop_
  _atom_type_symbol
  _atom_type_description
  _atom_type_scat_dispersion_real
  _atom_type_scat_dispersion_imag
  _atom_type_scat_source
 'C' 'C' 0.0033 0.0016 'International Tables Vol C Tables 4.2.6.8 and 6.1.1.4'
 'H' 'H' 0.0000 0.0000 'International Tables Vol C Tables 4.2.6.8 and 6.1.1.4'
 'N' 'N' 0.0061 0.0033 'International Tables Vol C Tables 4.2.6.8 and 6.1.1.4'
 'O' 'O' 0.0106 0.0060 'International Tables Vol C Tables 4.2.6.8 and 6.1.1.4'

_shelx_space_group_comment
;
The symmetry employed for this shelxl refinement is uniquely defined
by the following loop, which should always be used as a source of
symmetry information in preference to the above space-group names.
They are only intended as comments.
;
_space_group_crystal_system       'monoclinic'
_space_group_IT_number            14
_space_group_name_H-M_alt         'P 1 21/c 1'
_space_group_name_Hall            '-P 2ybc'
loop_
  _space_group_symop_operation_xyz
 'x, y, z'
 '-x, y+1/2, -z+1/2'
 '-x, -y, -z'
 'x, -y-1/2, z-1/2'

_cell_length_a                    6.7171(9)
_cell_length_b                    15.947(2)
_cell_length_c                    6.8061(9)
_cell_angle_alpha                 90
_cell_angle_beta                  91.201(4)
_cell_angle_gamma                 90
_cell_volume                      728.88(17)
_cell_formula_units_Z             2
_cell_measurement_reflns_used     7116
_cell_measurement_temperature     273(2)
_cell_measurement_theta_max       28.31
_cell_measurement_theta_min       3.03
_shelx_estimated_absorpt_T_max    0.983
_shelx_estimated_absorpt_T_min    0.966
_exptl_absorpt_coefficient_mu     0.100
_exptl_absorpt_correction_T_max   ?
_exptl_absorpt_correction_T_min   ?
_exptl_absorpt_correction_type    'multiscan'
_exptl_absorpt_process_details    ?
_exptl_crystal_colour             yellow
_exptl_crystal_colour_primary     yellow
_exptl_crystal_density_diffrn     1.368
_exptl_crystal_density_meas       ?
_exptl_crystal_density_method     'not measured'
_exptl_crystal_description        'BLOCK'
_exptl_crystal_F_000              316
_exptl_crystal_size_max           0.35
_exptl_crystal_size_mid           0.23
_exptl_crystal_size_min           0.17
_exptl_special_details
;
 ?
;
_exptl_transmission_factor_max    ?
_exptl_transmission_factor_min    ?
_diffrn_reflns_av_R_equivalents   0.0785
_diffrn_reflns_av_unetI/netI      0.0412
_diffrn_reflns_Laue_measured_fraction_full 0.998
_diffrn_reflns_Laue_measured_fraction_max 0.997
_diffrn_reflns_limit_h_max        8
_diffrn_reflns_limit_h_min        -8
_diffrn_reflns_limit_k_max        21
_diffrn_reflns_limit_k_min        -21
_diffrn_reflns_limit_l_max        8
_diffrn_reflns_limit_l_min        -9
_diffrn_reflns_number             21681
_diffrn_reflns_point_group_measured_fraction_full 0.998
_diffrn_reflns_point_group_measured_fraction_max 0.997
_diffrn_reflns_theta_full         25.242
_diffrn_reflns_theta_max          28.356
_diffrn_reflns_theta_min          3.033
_diffrn_ambient_temperature       273.15
_diffrn_detector_area_resol_mean  ?
_diffrn_measured_fraction_theta_full 0.998
_diffrn_measured_fraction_theta_max 0.997
_diffrn_measurement_device_type   'Bruker APEX-II CCD'
_diffrn_measurement_method        '\f and \w scans'
_diffrn_radiation_type            MoK\a
_diffrn_radiation_wavelength      0.71073
_diffrn_source                    ?
_diffrn_standards_number          0
_reflns_Friedel_coverage          0.000
_reflns_Friedel_fraction_full     .
_reflns_Friedel_fraction_max      .
_reflns_number_gt                 1125
_reflns_number_total              1808
_reflns_special_details
;
 Reflections were merged by SHELXL according to the crystal
 class for the calculation of statistics and refinement.
 
 _reflns_Friedel_fraction is defined as the number of unique
 Friedel pairs measured divided by the number that would be
 possible theoretically, ignoring centric projections and
 systematic absences.
;
_reflns_threshold_expression      'I > 2\s(I)'
_computing_cell_refinement        'Bruker SAINT'
_computing_data_collection        'Bruker APEX2'
_computing_data_reduction         'Bruker SAINT'
_computing_molecular_graphics     'Olex2 (Dolomanov et al., 2009)'
_computing_publication_material   'Olex2 (Dolomanov et al., 2009)'
_computing_structure_refinement   'XL (Sheldrick, 2008)'
_computing_structure_solution     'SHELXS-97 (Sheldrick 2008)'
_refine_diff_density_max          0.192
_refine_diff_density_min          -0.178
_refine_diff_density_rms          0.043
_refine_ls_extinction_coef        0.035(4)
_refine_ls_extinction_expression  'Fc^*^=kFc[1+0.001xFc^2^\l^3^/sin(2\q)]^-1/4^'
_refine_ls_extinction_method      SHELXL
_refine_ls_goodness_of_fit_ref    1.152
_refine_ls_hydrogen_treatment     mixed
_refine_ls_matrix_type            full
_refine_ls_number_parameters      105
_refine_ls_number_reflns          1808
_refine_ls_number_restraints      1
_refine_ls_R_factor_all           0.1293
_refine_ls_R_factor_gt            0.0747
_refine_ls_restrained_S_all       1.152
_refine_ls_shift/su_max           0.000
_refine_ls_shift/su_mean          0.000
_refine_ls_structure_factor_coef  Fsqd
_refine_ls_weighting_details
'w=1/[\s^2^(Fo^2^)+(0.0236P)^2^+0.7710P] where P=(Fo^2^+2Fc^2^)/3'
_refine_ls_weighting_scheme       calc
_refine_ls_wR_factor_gt           0.1386
_refine_ls_wR_factor_ref          0.1593
_refine_special_details
;
 ?
;
_olex2_refinement_description
;
1. Fixed Uiso
 At 1.2 times of:
  All C(H) groups
 At 1.5 times of:
  All C(H,H,H) groups
2. Restrained distances
 O1-H1
 0.82 with sigma of 0.01
3.a Me refined with riding coordinates:
 C8(H8A,H8B,H8C)
3.b Aromatic/amide H refined with riding coordinates:
 C3(H3), C4(H4), C6(H6), C7(H7)
;
_atom_sites_solution_hydrogens    mixed
_atom_sites_solution_primary      ?
_atom_sites_solution_secondary    ?
loop_
  _atom_site_label
  _atom_site_type_symbol
  _atom_site_fract_x
  _atom_site_fract_y
  _atom_site_fract_z
  _atom_site_U_iso_or_equiv
  _atom_site_adp_type
  _atom_site_occupancy
  _atom_site_site_symmetry_order
  _atom_site_calc_flag
  _atom_site_refinement_flags_posn
  _atom_site_refinement_flags_adp
  _atom_site_refinement_flags_occupancy
  _atom_site_disorder_assembly
  _atom_site_disorder_group
 O1 O -0.2197(3) 0.62542(16) 0.1746(4) 0.0641(7) Uani 1 1 d D . . . .
 O2 O 0.4571(3) 0.62682(16) -0.2710(3) 0.0725(7) Uani 1 1 d . . . . .
 N1 N -0.0178(3) 0.52631(14) 0.4189(3) 0.0459(6) Uani 1 1 d . . . . .
 C1 C 0.1203(4) 0.58096(15) 0.1248(4) 0.0377(6) Uani 1 1 d . . . . .
 C2 C -0.0520(4) 0.62577(16) 0.0661(4) 0.0424(6) Uani 1 1 d . . . . .
 C3 C -0.0505(4) 0.67157(18) -0.1052(4) 0.0494(7) Uani 1 1 d . . . . .
 H3 H -0.1636 0.7015 -0.1436 0.059 Uiso 1 1 calc R . . . .
 C4 C 0.1152(4) 0.67407(17) -0.2212(4) 0.0503(7) Uani 1 1 d . . . . .
 H4 H 0.1130 0.7052 -0.3368 0.060 Uiso 1 1 calc R . . . .
 C5 C 0.2855(4) 0.62996(17) -0.1652(4) 0.0461(7) Uani 1 1 d . . . . .
 C6 C 0.2863(4) 0.58461(16) 0.0072(4) 0.0444(7) Uani 1 1 d . . . . .
 H6 H 0.4009 0.5557 0.0456 0.053 Uiso 1 1 calc R . . . .
 C7 C 0.1299(4) 0.53046(16) 0.3019(4) 0.0435(7) Uani 1 1 d . . . . .
 H7 H 0.2453 0.5004 0.3315 0.052 Uiso 1 1 calc R . . . .
 C8 C 0.4761(6) 0.6818(2) -0.4326(5) 0.0722(10) Uani 1 1 d . . . . .
 H8A H 0.6025 0.6729 -0.4925 0.108 Uiso 1 1 calc R . . . .
 H8B H 0.4676 0.7388 -0.3879 0.108 Uiso 1 1 calc R . . . .
 H8C H 0.3710 0.6711 -0.5271 0.108 Uiso 1 1 calc R . . . .
 H1 H -0.205(6) 0.599(2) 0.278(3) 0.084(14) Uiso 1 1 d D . . . .

loop_
  _atom_site_aniso_label
  _atom_site_aniso_U_11
  _atom_site_aniso_U_22
  _atom_site_aniso_U_33
  _atom_site_aniso_U_23
  _atom_site_aniso_U_13
  _atom_site_aniso_U_12
 O1 0.0479(12) 0.0756(16) 0.0689(16) 0.0024(14) 0.0049(11) 0.0163(11)
 O2 0.0603(14) 0.0827(17) 0.0750(16) 0.0307(13) 0.0175(12) 0.0107(12)
 N1 0.0501(14) 0.0377(13) 0.0497(14) 0.0011(10) -0.0021(11) -0.0040(10)
 C1 0.0396(14) 0.0286(12) 0.0447(14) -0.0036(11) -0.0033(11) -0.0009(10)
 C2 0.0376(14) 0.0378(14) 0.0515(16) -0.0082(12) -0.0030(12) 0.0031(11)
 C3 0.0489(17) 0.0435(15) 0.0552(17) -0.0030(13) -0.0134(14) 0.0134(13)
 C4 0.0616(19) 0.0407(15) 0.0481(16) 0.0034(13) -0.0100(14) 0.0043(13)
 C5 0.0459(15) 0.0414(15) 0.0511(16) 0.0034(13) 0.0007(12) -0.0012(12)
 C6 0.0386(14) 0.0388(14) 0.0556(17) 0.0052(13) -0.0036(12) 0.0066(11)
 C7 0.0430(15) 0.0352(14) 0.0521(16) -0.0006(12) -0.0039(12) -0.0012(11)
 C8 0.081(2) 0.078(2) 0.058(2) 0.0116(18) 0.0108(17) -0.009(2)

_geom_special_details
;
 All esds (except the esd in the dihedral angle between two l.s. planes)
 are estimated using the full covariance matrix.  The cell esds are taken
 into account individually in the estimation of esds in distances, angles
 and torsion angles; correlations between esds in cell parameters are only
 used when they are defined by crystal symmetry.  An approximate (isotropic)
 treatment of cell esds is used for estimating esds involving l.s. planes.
;
loop_
  _geom_bond_atom_site_label_1
  _geom_bond_atom_site_label_2
  _geom_bond_distance
  _geom_bond_site_symmetry_2
  _geom_bond_publ_flag
 O1 C2 1.360(3) . ?
 O1 H1 0.826(10) . ?
 O2 C5 1.373(3) . ?
 O2 C8 1.414(4) . ?
 N1 N1 1.403(4) 3_566 ?
 N1 C7 1.287(3) . ?
 C1 C2 1.411(3) . ?
 C1 C6 1.388(4) . ?
 C1 C7 1.450(4) . ?
 C2 C3 1.376(4) . ?
 C3 H3 0.9300 . ?
 C3 C4 1.378(4) . ?
 C4 H4 0.9300 . ?
 C4 C5 1.390(4) . ?
 C5 C6 1.378(4) . ?
 C6 H6 0.9300 . ?
 C7 H7 0.9300 . ?
 C8 H8A 0.9600 . ?
 C8 H8B 0.9600 . ?
 C8 H8C 0.9600 . ?

loop_
  _geom_angle_atom_site_label_1
  _geom_angle_atom_site_label_2
  _geom_angle_atom_site_label_3
  _geom_angle
  _geom_angle_site_symmetry_1
  _geom_angle_site_symmetry_3
  _geom_angle_publ_flag
 C2 O1 H1 112(3) . . ?
 C5 O2 C8 118.4(3) . . ?
 C7 N1 N1 113.4(3) . 3_566 ?
 C2 C1 C7 122.6(2) . . ?
 C6 C1 C2 118.7(2) . . ?
 C6 C1 C7 118.7(2) . . ?
 O1 C2 C1 121.9(3) . . ?
 O1 C2 C3 118.9(2) . . ?
 C3 C2 C1 119.2(2) . . ?
 C2 C3 H3 119.3 . . ?
 C4 C3 C2 121.4(3) . . ?
 C4 C3 H3 119.3 . . ?
 C3 C4 H4 120.1 . . ?
 C3 C4 C5 119.9(3) . . ?
 C5 C4 H4 120.1 . . ?
 O2 C5 C4 124.7(3) . . ?
 C6 C5 O2 116.1(2) . . ?
 C6 C5 C4 119.2(3) . . ?
 C1 C6 H6 119.2 . . ?
 C5 C6 C1 121.6(2) . . ?
 C5 C6 H6 119.2 . . ?
 N1 C7 C1 121.4(2) . . ?
 N1 C7 H7 119.3 . . ?
 C1 C7 H7 119.3 . . ?
 O2 C8 H8A 109.5 . . ?
 O2 C8 H8B 109.5 . . ?
 O2 C8 H8C 109.5 . . ?
 H8A C8 H8B 109.5 . . ?
 H8A C8 H8C 109.5 . . ?
 H8B C8 H8C 109.5 . . ?

loop_
  _geom_torsion_atom_site_label_1
  _geom_torsion_atom_site_label_2
  _geom_torsion_atom_site_label_3
  _geom_torsion_atom_site_label_4
  _geom_torsion
  _geom_torsion_site_symmetry_1
  _geom_torsion_site_symmetry_2
  _geom_torsion_site_symmetry_3
  _geom_torsion_site_symmetry_4
  _geom_torsion_publ_flag
 O1 C2 C3 C4 -179.9(3) . . . . ?
 O2 C5 C6 C1 -178.3(3) . . . . ?
 N1 N1 C7 C1 179.3(2) 3_566 . . . ?
 C1 C2 C3 C4 0.5(4) . . . . ?
 C2 C1 C6 C5 -0.7(4) . . . . ?
 C2 C1 C7 N1 -2.4(4) . . . . ?
 C2 C3 C4 C5 -0.3(4) . . . . ?
 C3 C4 C5 O2 178.7(3) . . . . ?
 C3 C4 C5 C6 -0.4(4) . . . . ?
 C4 C5 C6 C1 0.9(4) . . . . ?
 C6 C1 C2 O1 -179.7(2) . . . . ?
 C6 C1 C2 C3 0.0(4) . . . . ?
 C6 C1 C7 N1 178.4(3) . . . . ?
 C7 C1 C2 O1 1.1(4) . . . . ?
 C7 C1 C2 C3 -179.2(2) . . . . ?
 C7 C1 C6 C5 178.6(2) . . . . ?
 C8 O2 C5 C4 10.2(4) . . . . ?
 C8 O2 C5 C6 -170.6(3) . . . . ?

_shelx_res_file
;
TITL wan in P2(1)/c
CELL 0.71073 6.7171 15.9468 6.8061 90 91.2007 90
ZERR 2 0.0009 0.0021 0.0009 0 0.0044 0
LATT 1
SYMM -X,0.5+Y,0.5-Z
SFAC C H N O
UNIT 32 32 4 8
DFIX 0.82 0.01 O1 H1

L.S. 20
PLAN  10
SIZE 0.17 0.23 0.35
TEMP 0
BOND $H
CONF
fmap 2 1 60
acta
REM <olex2.extras>
REM <HklSrc "%.\\wan.hkl">
REM </olex2.extras>

WGHT    0.023600    0.771000
EXTI    0.035166
FVAR       0.30104
O1    4   -0.219708    0.625421    0.174613    11.00000    0.04793    0.07563 =
         0.06893    0.00244    0.00486    0.01633
O2    4    0.457092    0.626816   -0.271017    11.00000    0.06027    0.08274 =
         0.07504    0.03069    0.01752    0.01075
N1    3   -0.017757    0.526306    0.418878    11.00000    0.05006    0.03767 =
         0.04972    0.00113   -0.00213   -0.00400
C1    1    0.120259    0.580957    0.124826    11.00000    0.03956    0.02856 =
         0.04472   -0.00360   -0.00334   -0.00090
C2    1   -0.051998    0.625768    0.066103    11.00000    0.03762    0.03780 =
         0.05151   -0.00825   -0.00298    0.00313
C3    1   -0.050484    0.671571   -0.105233    11.00000    0.04894    0.04352 =
         0.05518   -0.00296   -0.01342    0.01343
AFIX  43
H3    2   -0.163645    0.701471   -0.143576    11.00000   -1.20000
AFIX   0
C4    1    0.115177    0.674073   -0.221212    11.00000    0.06162    0.04069 =
         0.04814    0.00338   -0.01004    0.00432
AFIX  43
H4    2    0.112960    0.705222   -0.336756    11.00000   -1.20000
AFIX   0
C5    1    0.285539    0.629959   -0.165168    11.00000    0.04592    0.04136 =
         0.05114    0.00344    0.00072   -0.00123
C6    1    0.286273    0.584606    0.007151    11.00000    0.03857    0.03884 =
         0.05560    0.00521   -0.00358    0.00664
AFIX  43
H6    2    0.400891    0.555717    0.045563    11.00000   -1.20000
AFIX   0
C7    1    0.129888    0.530457    0.301868    11.00000    0.04298    0.03522 =
         0.05213   -0.00062   -0.00388   -0.00122
AFIX  43
H7    2    0.245308    0.500404    0.331515    11.00000   -1.20000
AFIX   0
C8    1    0.476062    0.681799   -0.432591    11.00000    0.08094    0.07798 =
         0.05815    0.01158    0.01081   -0.00870
AFIX  33
H8A   2    0.602456    0.672895   -0.492477    11.00000   -1.50000
H8B   2    0.467584    0.738761   -0.387900    11.00000   -1.50000
H8C   2    0.371023    0.671062   -0.527070    11.00000   -1.50000
AFIX   0
H1    2   -0.204816    0.598765    0.278016    11.00000    0.08383
HKLF 4

REM  wan in P2(1)/c
REM R1 =  0.0747 for    1125 Fo > 4sig(Fo)  and  0.1293 for all    1808 data
REM    105 parameters refined using      1 restraints

END

WGHT      0.0120      0.7375

REM Highest difference peak  0.192,  deepest hole -0.178,  1-sigma level  0.043
Q1    1   0.0178  0.5815  0.0626  11.00000  0.05    0.19
Q2    1   0.1816  0.6263 -0.2136  11.00000  0.05    0.17
Q3    1   0.0490  0.6213  0.1843  11.00000  0.05    0.17
Q4    1   0.0772  0.6986 -0.1150  11.00000  0.05    0.16
Q5    1  -0.0657  0.6246 -0.0581  11.00000  0.05    0.16
Q6    1   0.6205  0.5804 -0.5222  11.00000  0.05    0.15
Q7    1   0.1061  0.7238 -0.3942  11.00000  0.05    0.15
Q8    1   0.2207  0.6750 -0.1416  11.00000  0.05    0.15
Q9    1   0.3450  0.4846  0.3440  11.00000  0.05    0.15
Q10   1   0.0808  0.5563  0.3976  11.00000  0.05    0.15
;
_shelx_res_checksum               79074
_shelx_hkl_file
;
   1   0   0  260.33   12.82
   1   0   0  202.87   12.67
   1   0   0  216.76   12.73
  -2   0   0   73.82    4.09
  -2   0   0   70.76    4.07
   2   0   0   71.06    4.06
   2   0   0   74.78    4.07
  -2   0   0   68.97    4.05
   2   0   0   73.49    4.09
   2   0   0   74.68    4.09
  -2   0   0   70.81    4.08
  -3   0   0   18.26    1.11
  -3   0   0   18.70    1.13
  -3   0   0   19.01    1.10
  -3   0   0   19.40    1.08
   3   0   0   16.93    1.18
   3   0   0   17.23    1.14
   3   0   0   18.32    1.12
   3   0   0   19.38    1.11
   3   0   0   18.32    1.08
   4   0   0   24.99    1.60
   4   0   0   24.66    1.58
   4   0   0   26.75    1.58
  -4   0   0   26.19    1.55
  -4   0   0   24.97    1.58
   4   0   0   28.01    1.55
  -4   0   0   24.97    1.57
   4   0   0   26.88    1.52
   4   0   0   25.20    1.60
  -4   0   0   27.07    1.52
   5   0   0   14.33    1.00
  -5   0   0   13.73    0.87
  -5   0   0   12.13    0.93
   5   0   0   14.94    0.95
   5   0   0   14.00    1.01
  -5   0   0   14.05    0.95
   5   0   0   13.24    0.98
   5   0   0   13.28    0.88
   5   0   0   13.93    1.00
  -5   0   0   14.29    1.01
   6   0   0    2.05    0.55
  -6   0   0    3.04    0.57
  -6   0   0    1.65    0.45
   6   0   0    2.03    0.48
   6   0   0    1.71    0.43
   7   0   0    2.63    0.60
  -7   0   0    2.31    0.56
   7   0   0    2.24    0.44
  -7   0   0    2.25    0.38
   7   0   0    2.72    0.82
   7   0   0    1.50    0.70
  -7   0   0    2.46    0.54
  -7   0   0    2.03    0.67
   7   0   0    2.97    0.55
   7   0   0    2.58    0.56
   8   0   0    1.28    0.59
   8   0   0    0.94    0.52
  -8   0   0    0.53    0.42
  -8   0   0    0.14    0.80
   8   0   0    1.53    0.81
   8   0   0    0.24    0.92
   8   0   0    0.44    1.03
  -8   0   0    0.31    0.45
  -1  -1   0   50.89    2.70
  -1  -1   0   39.90    2.67
   1  -1   0   51.56    2.70
   1  -1   0   47.64    2.68
   1  -1   0   48.99    2.69
   1   1   0   46.89    2.69
  -1   1   0   51.78    2.71
   1   1   0   48.88    2.70
   1   1   0   39.87    2.67
  -1   1   0   47.24    2.70
   1   1   0   52.37    2.69
   2  -1   0   40.17    2.24
  -2  -1   0   39.72    2.26
   2  -1   0   41.18    2.25
  -2  -1   0   41.24    2.25
   2  -1   0   38.59    2.27
   2  -1   0   37.96    2.27
  -2  -1   0   38.62    2.26
   2  -1   0   38.30    2.27
  -2  -1   0   39.42    2.23
   2   1   0   40.97    2.27
  -2   1   0   39.56    2.24
  -2   1   0   40.21    2.25
   2   1   0   39.91    2.26
   2   1   0   38.46    2.23
   2   1   0   37.42    2.26
  -2   1   0   38.74    2.26
   2   1   0   42.19    2.25
  -2   1   0   38.83    2.26
  -3  -1   0   15.28    0.87
  -3  -1   0   15.07    0.89
   3  -1   0   14.02    0.94
   3  -1   0   14.79    0.92
  -3  -1   0   14.53    0.92
  -3  -1   0   13.98    0.92
   3  -1   0   15.85    0.90
   3  -1   0   14.97    0.94
   3  -1   0   15.59    0.88
   3   1   0   14.99    0.94
  -3   1   0   14.83    0.90
  -3   1   0   14.71    0.92
   3   1   0   14.71    0.87
  -3   1   0   14.00    0.93
   3   1   0   13.27    0.92
   3   1   0   15.68    0.90
  -3   1   0   15.00    0.88
  -4  -1   0    3.54    0.34
  -4  -1   0    2.65    0.37
   4  -1   0    3.66    0.46
  -4  -1   0    3.33    0.32
   4  -1   0    3.16    0.42
   4  -1   0    3.42    0.30
   4  -1   0    3.33    0.35
   4  -1   0    3.70    0.36
   4   1   0    3.26    0.35
   4   1   0    2.98    0.27
  -4   1   0    3.42    0.36
  -4   1   0    3.27    0.27
  -4   1   0    3.04    0.41
   4   1   0    2.62    0.31
   4   1   0    3.02    0.35
  -4   1   0    3.19    0.34
   4   1   0    2.96    0.35
  -5  -1   0    2.23    0.38
   5  -1   0    2.28    0.50
   5  -1   0    2.71    0.35
  -5  -1   0    2.88    0.49
   5  -1   0    3.37    0.49
   5  -1   0    2.98    0.53
   5  -1   0    3.09    0.37
  -5  -1   0    3.01    0.32
   5  -1   0    2.78    0.54
  -5   1   0    3.01    0.37
  -5   1   0    2.27    0.45
   5   1   0    2.53    0.44
  -5   1   0    2.73    0.49
   5   1   0    3.13    0.53
   5   1   0    3.29    0.36
  -5   1   0    3.12    0.38
   5   1   0    2.38    0.47
   5   1   0    3.96    0.51
   6  -1   0   43.34    2.72
   6  -1   0   46.42    2.83
  -6  -1   0   47.41    2.87
  -6  -1   0   48.15    2.72
   6  -1   0   48.63    2.82
   6  -1   0   50.67    2.78
  -6  -1   0   50.62    2.87
  -6  -1   0   42.71    2.83
   6  -1   0   45.81    2.87
   6  -1   0   45.45    2.84
   6   1   0   49.30    2.78
  -6   1   0   43.44    2.80
  -6   1   0   47.72    2.79
   6   1   0   47.98    2.90
  -6   1   0   50.07    2.74
   6   1   0   49.22    2.88
   6   1   0   45.30    2.80
  -6   1   0   45.84    2.82
   6   1   0   44.02    2.73
   6   1   0   47.86    2.88
   7  -1   0    0.77    0.30
  -7  -1   0    0.49    0.28
   7  -1   0    1.51    0.78
   7  -1   0    1.33    0.35
  -7  -1   0    0.76    0.61
   7  -1   0    0.79    0.59
  -7  -1   0    1.32    0.44
  -7  -1   0    0.79    0.35
   7  -1   0    0.99    0.70
   7   1   0    0.73    0.61
  -7   1   0    0.61    0.34
   7   1   0    0.61    0.62
  -7   1   0    0.78    0.56
   7   1   0    0.56    0.37
  -7   1   0    1.78    0.63
  -7   1   0    0.85    0.41
   7   1   0    0.19    0.42
   7   1   0    1.13    0.56
   7   1   0    0.55    0.62
  -8  -1   0   -0.85    0.48
   8  -1   0    1.22    0.58
   8  -1   0   -0.92    0.80
  -8  -1   0   -0.84    0.50
   8  -1   0    0.63    0.40
  -8  -1   0    0.03    0.39
   8  -1   0    0.74    0.69
  -8   1   0    0.37    0.79
   8   1   0    0.16    0.86
   8   1   0   -0.72    0.82
  -8   1   0    0.52    0.54
   8   1   0   -1.11    1.10
   8   1   0    0.01    0.48
  -1  -2   0  104.05    5.49
  -1  -2   0   92.97    5.50
  -1  -2   0   92.97    5.52
   1  -2   0  101.20    5.49
  -1  -2   0   99.32    5.50
   1  -2   0  106.03    5.51
   1  -2   0   99.82    5.50
  -1  -2   0   88.28    5.50
   1  -2   0   97.26    5.50
   1  -2   0   93.73    5.49
  -1   2   0  103.94    5.50
   1   2   0   97.20    5.50
  -1   2   0   89.04    5.49
  -1   2   0   95.03    5.50
   1   2   0  105.21    5.50
   1   2   0  101.27    5.49
   1   2   0  100.13    5.50
   2  -2   0    8.39    0.49
   2  -2   0    8.57    0.49
  -2  -2   0    8.60    0.50
   2  -2   0    8.20    0.54
  -2  -2   0    8.13    0.49
   2  -2   0    7.75    0.52
  -2  -2   0    7.22    0.52
  -2  -2   0    8.11    0.51
  -2  -2   0    8.01    0.52
  -2   2   0    8.28    0.52
  -2   2   0    7.77    0.53
   2   2   0    8.47    0.52
  -2   2   0    7.72    0.49
  -2   2   0    8.44    0.50
   2   2   0    7.10    0.47
   2   2   0    7.84    0.51
  -2   2   0    6.92    0.52
   2   2   0    7.38    0.52
   2   2   0    8.54    0.50
   3  -2   0   11.82    0.71
  -3  -2   0   12.51    0.74
   3  -2   0   12.05    0.77
  -3  -2   0   11.66    0.76
  -3  -2   0   10.89    0.73
   3  -2   0   11.63    0.77
  -3  -2   0   11.96    0.68
   3  -2   0   12.31    0.72
   3  -2   0   11.37    0.77
   3   2   0   11.23    0.74
   3   2   0   12.28    0.72
  -3   2   0   10.64    0.74
   3   2   0   10.94    0.75
  -3   2   0   11.15    0.76
  -3   2   0   11.73    0.71
  -3   2   0   11.46    0.72
   3   2   0   10.47    0.68
   4  -2   0   -0.15    0.26
   4  -2   0   -0.03    0.19
  -4  -2   0   -0.16    0.14
   4  -2   0   -0.08    0.27
  -4  -2   0    0.17    0.10
   4  -2   0   -0.05    0.10
  -4  -2   0   -0.26    0.15
   4   2   0    0.16    0.17
  -4   2   0   -0.22    0.15
   4   2   0    0.06    0.11
  -4   2   0   -0.06    0.14
  -4   2   0    0.01    0.14
   4   2   0   -0.09    0.25
   4   2   0   -0.23    0.18
  -4   2   0    0.03    0.25
   4   2   0   -0.25    0.20
   5  -2   0    0.25    0.16
  -5  -2   0    0.35    0.15
   5  -2   0    0.41    0.20
   5  -2   0    0.45    0.38
  -5  -2   0    0.75    0.22
   5  -2   0    0.64    0.39
   5  -2   0    0.40    0.42
  -5  -2   0    0.20    0.23
  -5  -2   0    0.54    0.20
   5   2   0    0.06    0.24
  -5   2   0    0.40    0.21
  -5   2   0    0.68    0.34
   5   2   0    0.29    0.24
  -5   2   0    0.38    0.23
  -5   2   0    0.31    0.35
   5   2   0    0.33    0.49
   5   2   0    0.62    0.39
  -6  -2   0    5.03    0.44
   6  -2   0    4.31    0.73
   6  -2   0    3.52    0.70
   6  -2   0    4.92    0.83
   6  -2   0    5.07    0.56
   6  -2   0    4.99    0.70
  -6  -2   0    4.80    0.69
  -6  -2   0    4.34    0.71
  -6   2   0    5.65    0.64
   6   2   0    4.43    0.64
   6   2   0    4.06    0.48
  -6   2   0    5.68    0.75
  -6   2   0    4.17    0.71
   6   2   0    5.95    0.66
  -6   2   0    4.70    0.45
   6   2   0    5.35    0.56
   6   2   0    4.07    0.75
   7  -2   0    4.63    0.88
   7  -2   0    3.85    0.82
   7  -2   0    3.35    0.80
   7  -2   0    4.29    0.70
   7  -2   0    3.22    0.62
  -7  -2   0    4.18    0.62
  -7  -2   0    3.27    0.44
   7  -2   0    2.51    0.50
  -7  -2   0    2.72    0.62
  -7   2   0    3.88    0.74
  -7   2   0    3.61    0.58
  -7   2   0    2.73    0.57
   7   2   0    3.98    0.77
  -7   2   0    3.38    0.64
   7   2   0    3.12    0.63
   7   2   0    5.15    0.90
  -8  -2   0   -0.09    0.84
  -8  -2   0    1.57    0.72
   8  -2   0    2.27    0.97
   8  -2   0    0.62    0.68
   8  -2   0    1.06    0.68
   8  -2   0    1.25    0.50
   8   2   0    2.64    0.82
  -8   2   0    1.10    0.58
   8   2   0    0.65    0.48
  -8   2   0    1.72    0.51
   8   2   0    1.50    0.97
   0  -3   0    0.11    0.04
   0   3   0    0.06    0.05
   0   3   0    0.21    0.08
   0   3   0    0.03    0.07
   0   3   0    0.13    0.04
   1  -3   0   64.74    3.50
   1  -3   0   63.48    3.49
  -1  -3   0   65.27    3.48
   1  -3   0   56.30    3.47
  -1  -3   0   61.70    3.50
   1  -3   0   64.98    3.50
  -1  -3   0   62.33    3.49
  -1  -3   0   63.87    3.49
  -1  -3   0   55.09    3.46
   1   3   0   63.55    3.49
   1   3   0   62.84    3.48
  -1   3   0   61.28    3.50
   1   3   0   62.29    3.50
   1   3   0   53.37    3.46
  -1   3   0   63.43    3.50
  -1   3   0   63.33    3.49
   1   3   0   65.18    3.50
  -2  -3   0   11.84    0.71
   2  -3   0   11.17    0.72
   2  -3   0   11.69    0.69
  -2  -3   0   12.55    0.70
   2  -3   0   11.77    0.70
  -2  -3   0   10.73    0.71
  -2  -3   0   11.52    0.66
   2  -3   0   11.87    0.72
   2  -3   0   11.83    0.72
  -2   3   0   11.74    0.70
  -2   3   0   10.70    0.69
   2   3   0   10.71    0.71
   2   3   0   11.51    0.71
   2   3   0   12.66    0.70
  -2   3   0   11.84    0.72
  -2   3   0   11.36    0.72
   2   3   0   11.64    0.71
  -2   3   0   10.63    0.73
   3  -3   0    3.79    0.33
   3  -3   0    3.91    0.31
   3  -3   0    3.70    0.28
  -3  -3   0    3.24    0.37
  -3  -3   0    4.06    0.24
   3  -3   0    3.55    0.37
  -3  -3   0    3.40    0.35
   3  -3   0    3.66    0.32
  -3  -3   0    3.81    0.37
  -3  -3   0    3.77    0.30
  -3   3   0    3.23    0.32
  -3   3   0    3.46    0.30
   3   3   0    3.02    0.30
   3   3   0    3.83    0.30
   3   3   0    3.01    0.24
  -3   3   0    3.37    0.31
  -3   3   0    3.16    0.38
   3   3   0    3.72    0.37
  -3   3   0    3.09    0.30
   4  -3   0    1.32    0.25
  -4  -3   0    0.44    0.20
  -4  -3   0    1.36    0.16
   4  -3   0    0.99    0.20
   4  -3   0    0.96    0.20
   4  -3   0    1.20    0.31
   4  -3   0    0.74    0.32
  -4  -3   0    0.56    0.19
  -4  -3   0    0.86    0.20
  -4   3   0    1.27    0.26
  -4   3   0    1.19    0.30
   4   3   0    1.10    0.32
   4   3   0    0.78    0.14
   4   3   0    1.04    0.19
  -4   3   0    0.88    0.24
   4   3   0    1.08    0.24
  -4   3   0    0.64    0.29
   5  -3   0    3.87    0.41
   5  -3   0    4.20    0.47
  -5  -3   0    3.17    0.40
   5  -3   0    3.33    0.60
   5  -3   0    3.93    0.55
  -5  -3   0    3.83    0.45
   5  -3   0    3.78    0.46
  -5  -3   0    3.55    0.41
  -5  -3   0    3.51    0.31
   5   3   0    2.67    0.57
   5   3   0    3.70    0.42
   5   3   0    3.08    0.46
  -5   3   0    4.24    0.44
  -5   3   0    3.08    0.40
  -5   3   0    4.03    0.48
   5   3   0    2.74    0.43
  -5   3   0    3.87    0.57
   6  -3   0   33.85    2.02
   6  -3   0   33.52    2.14
  -6  -3   0   33.27    1.91
  -6  -3   0   30.26    2.01
   6  -3   0   32.69    1.99
  -6  -3   0   29.24    2.19
  -6  -3   0   33.51    2.05
   6  -3   0   31.90    2.09
   6  -3   0   32.47    2.05
  -6   3   0   33.44    2.10
  -6   3   0   31.77    1.99
   6   3   0   31.86    2.06
  -6   3   0   29.81    2.05
   6   3   0   32.42    2.08
   6   3   0   35.11    2.04
  -6   3   0   35.44    1.98
   6   3   0   34.22    2.06
  -7  -3   0    0.06    0.41
  -7  -3   0    0.84    0.23
   7  -3   0    2.14    0.86
   7  -3   0    0.73    0.34
  -7  -3   0    1.27    0.67
   7  -3   0    0.75    0.76
  -7  -3   0    1.42    0.53
   7  -3   0    0.28    0.46
   7  -3   0    0.07    0.63
   7  -3   0    1.05    0.35
  -7   3   0    0.87    0.34
  -7   3   0   -0.13    0.65
   7   3   0    1.33    0.76
   7   3   0    0.86    0.39
  -7   3   0    1.27    0.42
   7   3   0    1.39    0.66
   7   3   0    1.07    0.41
   7   3   0    1.46    0.70
  -7   3   0    1.24    0.36
  -8  -3   0    1.19    0.58
  -8  -3   0    0.46    0.33
   8  -3   0   -0.71    1.00
   8  -3   0   -1.67    1.06
  -8  -3   0    1.16    0.51
   8  -3   0    1.16    0.85
   8  -3   0   -0.34    0.74
  -8   3   0    0.20    0.64
   8   3   0    1.37    0.70
  -8   3   0    0.08    0.77
  -8   3   0    0.56    0.51
   0  -4   0  539.22   29.92
   0  -4   0  546.80   30.06
   0  -4   0  539.70   29.93
   0  -4   0  547.84   29.97
   0   4   0  531.21   29.95
   0   4   0  537.56   30.05
   0   4   0  557.74   30.02
   0   4   0  453.49   29.87
   0   4   0  555.16   30.01
   1  -4   0   32.23    1.77
  -1  -4   0   31.35    1.78
  -1  -4   0   29.39    1.74
  -1  -4   0   31.00    1.78
  -1  -4   0   30.68    1.78
  -1  -4   0   33.26    1.76
   1  -4   0   27.61    1.75
   1  -4   0   32.63    1.79
   1  -4   0   31.78    1.79
   1  -4   0   30.97    1.78
   1   4   0   30.26    1.78
  -1   4   0   30.90    1.79
  -1   4   0   32.21    1.78
  -1   4   0   31.06    1.77
   1   4   0   31.80    1.78
   1   4   0   31.44    1.79
   1   4   0   30.44    1.76
   1   4   0   27.98    1.74
   2  -4   0   19.91    1.18
  -2  -4   0   17.53    1.10
  -2  -4   0   19.58    1.18
  -2  -4   0   21.92    1.15
   2  -4   0   19.51    1.17
  -2  -4   0   19.88    1.16
  -2  -4   0   17.35    1.10
  -2  -4   0   20.71    1.17
   2  -4   0   20.49    1.15
   2  -4   0   19.59    1.16
   2  -4   0   19.45    1.13
  -2   4   0   19.13    1.18
  -2   4   0   20.44    1.15
  -2   4   0   18.83    1.16
   2   4   0   19.78    1.17
   2   4   0   21.16    1.15
   2   4   0   19.18    1.16
  -2   4   0   17.78    1.13
  -2   4   0   19.18    1.17
   2   4   0   18.80    1.17
  -3  -4   0    6.61    0.54
  -3  -4   0    7.64    0.49
   3  -4   0    7.57    0.49
   3  -4   0    7.68    0.54
   3  -4   0    7.28    0.55
   3  -4   0    6.30    0.52
   3  -4   0    7.41    0.48
  -3  -4   0    7.31    0.52
  -3   4   0    7.49    0.51
  -3   4   0    6.83    0.51
  -3   4   0    6.75    0.54
  -3   4   0    7.37    0.53
   3   4   0    6.55    0.50
  -3   4   0    6.79    0.49
   3   4   0    6.05    0.53
   3   4   0    8.05    0.51
   4  -4   0   20.01    1.13
   4  -4   0   17.90    1.21
   4  -4   0   18.31    1.17
  -4  -4   0   16.97    1.16
  -4  -4   0   18.38    1.17
  -4  -4   0   19.13    1.07
   4  -4   0   18.12    1.19
   4  -4   0   18.86    1.13
  -4  -4   0   19.17    1.16
   4   4   0   19.35    1.16
  -4   4   0   18.14    1.20
  -4   4   0   16.47    1.19
   4   4   0   17.66    1.17
   4   4   0   20.13    1.18
  -4   4   0   17.84    1.20
  -4   4   0   19.03    1.14
  -4   4   0   17.13    1.13
   4   4   0   18.63    1.18
  -5  -4   0    5.35    0.37
   5  -4   0    4.64    0.53
   5  -4   0    4.75    0.64
  -5  -4   0    3.93    0.44
  -5  -4   0    4.68    0.63
   5  -4   0    4.88    0.46
  -5  -4   0    5.85    0.55
   5  -4   0    5.16    0.62
   5  -4   0    4.77    0.49
  -5   4   0    5.66    0.51
  -5   4   0    4.96    0.46
  -5   4   0    4.39    0.49
  -5   4   0    5.31    0.59
   5   4   0    5.35    0.61
   5   4   0    3.93    0.51
   5   4   0    4.30    0.56
   6  -4   0    6.64    0.65
  -6  -4   0    6.64    0.63
   6  -4   0    6.41    0.89
   6  -4   0    5.35    0.79
   6  -4   0    6.98    0.59
  -6  -4   0    6.29    0.47
  -6  -4   0    5.13    0.57
  -6  -4   0    6.42    0.85
  -6   4   0    6.58    0.58
  -6   4   0    6.44    0.61
  -6   4   0    6.75    0.64
   6   4   0    5.65    0.85
   6   4   0    6.39    0.74
   6   4   0    5.96    0.65
  -6   4   0    6.48    0.76
   6   4   0    4.90    0.67
  -7  -4   0    1.75    0.55
   7  -4   0    1.02    0.69
  -7  -4   0    1.62    0.49
   7  -4   0    0.13    0.48
   7  -4   0    2.09    0.54
   7  -4   0    1.68    0.39
   7  -4   0    1.04    0.65
  -7  -4   0    1.43    0.69
  -7  -4   0    0.95    0.26
   7   4   0    0.19    0.44
  -7   4   0    0.66    0.30
  -7   4   0    0.01    0.48
   7   4   0    1.48    0.76
   7   4   0    1.62    0.57
  -7   4   0    0.32    0.37
  -7   4   0    0.80    0.65
  -8  -4   0    0.84    0.92
   8  -4   0    1.98    0.96
  -8  -4   0    1.65    0.34
   8  -4   0    3.02    0.61
   8   4   0    1.51    0.93
  -8   4   0    1.67    0.62
  -8   4   0    2.39    0.58
  -8   4   0    1.64    0.59
   8   4   0    2.75    0.93
   0  -5   0    0.05    0.06
   0  -5   0    0.04    0.08
   0  -5   0    0.17    0.12
   0  -5   0    0.05    0.11
   0  -5   0   -0.03    0.07
   0   5   0    0.06    0.10
   0   5   0    0.22    0.15
   0   5   0    0.06    0.06
   0   5   0    0.08    0.08
   0   5   0    0.10    0.11
  -1  -5   0   33.37    1.93
  -1  -5   0   32.99    1.96
  -1  -5   0   36.57    1.94
   1  -5   0   34.94    1.98
   1  -5   0   34.77    1.95
   1  -5   0   30.11    1.93
  -1  -5   0   34.63    1.97
  -1  -5   0   35.02    1.98
   1  -5   0   35.92    1.98
   1  -5   0   37.01    1.98
   1   5   0   34.38    1.98
   1   5   0   32.63    1.94
  -1   5   0   34.30    1.97
  -1   5   0   34.10    1.97
   1   5   0   33.03    1.95
  -1   5   0   33.98    1.95
   1   5   0   33.15    1.97
   1   5   0   34.59    1.97
  -1   5   0   33.98    1.98
  -2  -5   0   75.47    4.19
   2  -5   0   74.89    4.20
  -2  -5   0   79.05    4.20
   2  -5   0   72.41    4.16
   2  -5   0   75.09    4.20
   2  -5   0   73.90    4.20
  -2  -5   0   73.98    4.21
   2  -5   0   77.48    4.18
  -2  -5   0   67.06    4.13
  -2  -5   0   77.70    4.17
  -2   5   0   64.69    4.15
   2   5   0   73.91    4.20
  -2   5   0   71.59    4.19
  -2   5   0   70.54    4.20
   2   5   0   74.39    4.21
  -2   5   0   73.86    4.18
   2   5   0   77.18    4.17
  -2   5   0   75.34    4.20
   2   5   0   73.79    4.19
   3  -5   0   -0.12    0.10
  -3  -5   0   -0.01    0.16
   3  -5   0    0.19    0.11
  -3  -5   0   -0.21    0.12
   3  -5   0    0.10    0.20
  -3  -5   0    0.00    0.06
   3  -5   0   -0.14    0.14
  -3  -5   0   -0.01    0.15
   3  -5   0    0.13    0.20
   3   5   0   -0.06    0.11
  -3   5   0   -0.16    0.10
   3   5   0   -0.08    0.22
  -3   5   0   -0.07    0.17
  -3   5   0   -0.11    0.20
   3   5   0    0.11    0.21
  -3   5   0    0.29    0.17
   4  -5   0    2.00    0.31
   4  -5   0    2.31    0.27
   4  -5   0    2.15    0.42
   4  -5   0    1.67    0.28
  -4  -5   0    2.42    0.18
  -4  -5   0    2.08    0.40
   4  -5   0    1.76    0.36
  -4  -5   0    2.00    0.33
  -4  -5   0    1.73    0.29
   4   5   0    2.59    0.38
  -4   5   0    1.57    0.31
  -4   5   0    1.60    0.36
   4   5   0    1.94    0.36
   4   5   0    1.73    0.30
  -4   5   0    2.01    0.40
  -4   5   0    1.97    0.31
   4   5   0    1.65    0.32
  -4   5   0    2.56    0.34
  -5  -5   0   -0.36    0.24
   5  -5   0    0.15    0.18
   5  -5   0    0.02    0.42
   5  -5   0    0.60    0.33
   5  -5   0    0.06    0.17
   5  -5   0    0.00    0.39
  -5  -5   0   -0.47    0.38
  -5   5   0    0.37    0.30
  -5   5   0    0.47    0.29
   5   5   0   -0.14    0.29
   5   5   0   -0.01    0.41
  -5   5   0    0.45    0.21
  -5   5   0    0.68    0.32
   5   5   0   -0.36    0.40
   5   5   0   -0.13    0.26
  -6  -5   0    3.54    0.49
   6  -5   0    4.43    0.59
   6  -5   0    4.14    0.78
  -6  -5   0    3.65    0.67
   6  -5   0    4.95    0.56
  -6  -5   0    3.96    0.35
   6  -5   0    4.62    0.44
   6  -5   0    5.67    0.90
  -6   5   0    3.04    0.56
   6   5   0    4.30    0.75
  -6   5   0    4.45    0.79
   6   5   0    3.76    0.60
   6   5   0    3.67    0.51
  -6   5   0    3.97    0.61
   6   5   0    4.80    0.65
  -6   5   0    4.55    0.57
   7  -5   0    0.68    0.69
  -7  -5   0    1.87    0.45
  -7  -5   0    0.85    0.56
   7  -5   0    1.33    0.42
   7  -5   0    1.13    0.88
   7  -5   0   -0.22    0.51
   7  -5   0    0.62    0.46
  -7   5   0    0.45    0.58
  -7   5   0    0.71    0.28
   7   5   0   -0.06    0.53
   7   5   0    1.04    0.62
  -7   5   0    0.53    0.75
  -7   5   0    1.01    0.39
   8  -5   0    0.79    1.06
   8  -5   0   -0.56    0.93
   8  -5   0    0.23    0.98
  -8   5   0    0.43    0.54
   8   5   0   -0.25    0.69
  -8   5   0   -0.62    0.59
  -8   5   0    0.10    0.90
   8   5   0    1.43    0.78
   0  -6   0   70.55    4.29
   0  -6   0   81.87    4.33
   0  -6   0   77.72    4.30
   0  -6   0   81.15    4.33
   0  -6   0   78.48    4.34
   0   6   0   79.39    4.33
   0   6   0   79.61    4.34
   0   6   0   65.49    4.29
   0   6   0   73.82    4.30
   1  -6   0   23.33    1.37
   1  -6   0   20.98    1.32
  -1  -6   0   25.13    1.33
  -1  -6   0   23.27    1.37
   1  -6   0   23.64    1.37
  -1  -6   0   23.21    1.32
   1  -6   0   24.24    1.35
  -1  -6   0   23.66    1.37
   1  -6   0   23.64    1.38
  -1  -6   0   23.77    1.38
   1   6   0   21.82    1.32
  -1   6   0   23.05    1.37
   1   6   0   21.61    1.33
  -1   6   0   23.03    1.38
  -1   6   0   22.83    1.36
   1   6   0   21.97    1.40
  -1   6   0   23.61    1.35
   1   6   0   22.92    1.36
   1   6   0   22.67    1.37
   2  -6   0   76.84    4.53
  -2  -6   0   86.09    4.55
  -2  -6   0   81.93    4.59
  -2  -6   0   81.40    4.57
   2  -6   0   82.19    4.58
   2  -6   0   82.00    4.55
   2  -6   0   80.36    4.58
   2  -6   0   81.73    4.58
  -2  -6   0   76.94    4.50
  -2  -6   0   82.83    4.58
  -2   6   0   67.82    4.53
   2   6   0   83.70    4.58
  -2   6   0   78.39    4.55
  -2   6   0   80.68    4.58
   2   6   0   80.95    4.58
   2   6   0   83.24    4.55
  -2   6   0   82.27    4.58
  -2   6   0   79.23    4.59
   3  -6   0    0.00    0.24
   3  -6   0   -0.06    0.08
   3  -6   0    0.09    0.13
   3  -6   0    0.28    0.25
  -3  -6   0    0.12    0.05
  -3  -6   0   -0.14    0.28
  -3  -6   0    0.07    0.06
  -3  -6   0    0.14    0.23
   3  -6   0   -0.09    0.21
   3   6   0    0.02    0.12
  -3   6   0   -0.15    0.13
   3   6   0    0.09    0.21
  -3   6   0   -0.11    0.22
  -3   6   0   -0.12    0.18
  -3   6   0    0.26    0.19
  -3   6   0    0.03    0.21
   3   6   0    0.11    0.23
   4  -6   0    1.81    0.26
  -4  -6   0    2.23    0.48
  -4  -6   0    1.95    0.27
  -4  -6   0    1.85    0.26
   4  -6   0    2.08    0.41
   4  -6   0    2.11    0.34
  -4  -6   0    1.63    0.38
   4  -6   0    1.70    0.30
  -4  -6   0    1.37    0.16
   4  -6   0    1.63    0.36
   4   6   0    1.42    0.30
   4   6   0    1.92    0.39
  -4   6   0    1.66    0.29
  -4   6   0    1.98    0.25
  -4   6   0    1.58    0.31
  -4   6   0    1.82    0.43
   4   6   0    1.67    0.38
  -4   6   0    1.46    0.31
  -5  -6   0    0.86    0.26
   5  -6   0    1.11    0.24
  -5  -6   0    1.01    0.19
   5  -6   0    1.31    0.55
  -5  -6   0    0.51    0.33
   5  -6   0    1.09    0.31
  -5  -6   0    0.34    0.31
   5  -6   0    0.72    0.44
  -5  -6   0    1.01    0.18
   5  -6   0    1.12    0.43
  -5   6   0    1.03    0.42
  -5   6   0    1.54    0.23
   5   6   0    0.85    0.30
   5   6   0    0.65    0.43
  -5   6   0    0.40    0.38
  -5   6   0    1.31    0.49
   5   6   0    1.27    0.31
  -5   6   0    0.96    0.26
   5   6   0    0.50    0.40
   6  -6   0    1.25    0.41
  -6  -6   0    1.09    0.20
   6  -6   0    0.90    0.36
   6  -6   0    0.74    0.32
  -6  -6   0    0.74    0.55
   6  -6   0    0.93    0.60
   6  -6   0    0.22    0.41
  -6  -6   0    0.37    0.35
  -6   6   0    0.54    0.48
   6   6   0    0.04    0.49
   6   6   0    1.24    0.55
  -6   6   0    1.08    0.33
   6   6   0    0.34    0.35
  -6   6   0    1.10    0.63
  -6   6   0    1.30    0.40
   6   6   0    1.14    0.61
  -7  -6   0    0.89    0.18
  -7  -6   0    1.67    0.59
  -7  -6   0    0.50    0.79
   7  -6   0    1.74    0.61
   7  -6   0    0.81    0.44
   7  -6   0    0.53    0.56
   7  -6   0    0.85    0.51
  -7   6   0   -0.56    1.09
  -7   6   0    1.28    0.33
   7   6   0    0.68    0.74
  -7   6   0    0.93    0.52
  -7   6   0    1.18    0.37
   7   6   0    1.28    0.81
   8  -6   0    0.88    1.07
  -8  -6   0    0.36    0.97
  -8   6   0   -0.88    0.61
  -8   6   0   -0.45    0.55
   8   6   0    2.59    1.19
   0  -7   0   -0.05    0.14
   0  -7   0    0.00    0.10
   0  -7   0   -0.04    0.07
   0  -7   0   -0.21    0.12
   0  -7   0    0.11    0.16
   0   7   0   -0.03    0.10
   0   7   0   -0.02    0.08
   0   7   0    0.00    0.11
   0   7   0    0.13    0.16
  -1  -7   0    5.85    0.36
  -1  -7   0    5.46    0.42
  -1  -7   0    5.19    0.45
   1  -7   0    5.16    0.40
   1  -7   0    4.69    0.35
   1  -7   0    5.46    0.40
   1  -7   0    5.25    0.42
  -1  -7   0    6.12    0.36
   1  -7   0    4.77    0.35
   1  -7   0    5.72    0.40
  -1  -7   0    5.19    0.40
  -1   7   0    5.58    0.43
   1   7   0    5.72    0.44
  -1   7   0    5.33    0.42
  -1   7   0    5.49    0.39
   1   7   0    5.20    0.43
  -1   7   0    5.48    0.43
   1   7   0    5.06    0.36
  -2  -7   0   36.14    2.07
   2  -7   0   38.89    2.13
  -2  -7   0   40.72    2.12
   2  -7   0   35.98    2.10
  -2  -7   0   35.72    2.15
   2  -7   0   37.53    2.17
   2  -7   0   38.16    2.17
   2  -7   0   37.07    2.16
  -2  -7   0   37.11    2.15
  -2  -7   0   37.47    2.18
   2   7   0   33.08    2.08
  -2   7   0   36.37    2.15
  -2   7   0   36.48    2.16
  -2   7   0   37.48    2.13
   2   7   0   35.58    2.16
   2   7   0   36.37    2.15
  -2   7   0   35.03    2.17
   2   7   0   36.27    2.12
   3  -7   0    0.35    0.27
  -3  -7   0    0.29    0.13
  -3  -7   0    0.17    0.23
   3  -7   0    0.34    0.13
   3  -7   0   -0.08    0.19
  -3  -7   0    0.15    0.22
  -3  -7   0   -0.11    0.24
  -3  -7   0    0.21    0.06
   3  -7   0   -0.10    0.23
  -3   7   0    0.40    0.16
  -3   7   0    0.08    0.26
  -3   7   0   -0.06    0.18
   3   7   0    0.05    0.14
  -3   7   0    0.15    0.29
   3   7   0    0.00    0.26
   3   7   0    0.08    0.14
  -3   7   0    0.17    0.15
   3   7   0   -0.02    0.22
  -4  -7   0    8.05    0.62
   4  -7   0    8.60    0.63
  -4  -7   0    7.93    0.56
   4  -7   0    7.72    0.72
   4  -7   0    7.74    0.67
   4  -7   0    7.84    0.53
  -4  -7   0    6.28    0.43
  -4  -7   0    7.31    0.59
   4  -7   0    7.88    0.69
  -4  -7   0    7.61    0.67
  -4  -7   0    6.61    0.43
   4   7   0    7.12    0.80
  -4   7   0    7.51    0.69
   4   7   0    7.13    0.65
   4   7   0    7.53    0.58
   4   7   0    6.54    0.60
  -4   7   0    6.46    0.57
  -4   7   0    7.95    0.70
  -4   7   0    7.97    0.56
  -5  -7   0    3.48    0.61
  -5  -7   0    3.25    0.22
  -5  -7   0    4.22    0.71
   5  -7   0    3.92    0.79
   5  -7   0    4.13    0.53
   5  -7   0    2.80    0.63
   5  -7   0    3.96    0.46
  -5  -7   0    3.42    0.45
  -5  -7   0    4.68    0.57
   5   7   0    3.09    0.45
  -5   7   0    3.51    0.46
  -5   7   0    3.11    0.71
  -5   7   0    2.83    0.42
   5   7   0    3.41    0.66
  -5   7   0    4.43    0.52
  -5   7   0    3.41    0.51
   5   7   0    3.65    0.45
   5   7   0    2.63    0.46
   6  -7   0    0.06    0.27
   6  -7   0   -0.49    0.59
   6  -7   0    0.11    0.45
   6  -7   0    0.09    0.64
  -6  -7   0   -0.48    0.49
  -6  -7   0    0.03    0.38
  -6  -7   0    0.35    0.28
   6  -7   0   -0.33    0.36
  -6  -7   0   -0.12    0.13
  -6   7   0   -0.10    0.40
  -6   7   0    0.84    0.51
  -6   7   0    0.17    0.26
   6   7   0    0.37    0.62
   6   7   0    0.22    0.33
   6   7   0    0.22    0.36
  -6   7   0   -0.24    0.29
  -7  -7   0    2.50    0.50
   7  -7   0    1.22    0.59
  -7  -7   0    2.77    0.59
   7  -7   0    2.46    0.86
   7  -7   0    2.37    1.02
  -7  -7   0    4.23    0.84
   7   7   0    3.17    0.49
   7   7   0    3.84    0.61
  -7   7   0    2.28    0.46
   7   7   0    0.67    0.88
  -7   7   0    2.61    1.09
  -7   7   0    2.64    0.51
  -8  -7   0    1.32    0.77
   8  -7   0    0.10    0.91
  -8   7   0    1.01    0.69
  -8   7   0    1.80    0.70
  -8   7   0    0.88    0.62
   0  -8   0   17.66    1.06
   0  -8   0   18.12    1.15
   0  -8   0   19.23    1.09
   0  -8   0   18.14    1.12
   0  -8   0   18.17    1.12
   0   8   0   18.55    1.13
   0   8   0   18.79    1.13
   0   8   0   18.45    1.14
   0   8   0   17.77    1.09
  -1  -8   0    4.26    0.35
  -1  -8   0    4.29    0.43
   1  -8   0    4.61    0.39
   1  -8   0    3.60    0.30
   1  -8   0    4.67    0.43
   1  -8   0    4.32    0.38
   1  -8   0    3.84    0.30
  -1  -8   0    4.33    0.31
  -1  -8   0    4.86    0.31
   1  -8   0    4.12    0.36
  -1  -8   0    4.19    0.40
   1   8   0    4.11    0.31
   1   8   0    3.93    0.37
   1   8   0    3.88    0.32
  -1   8   0    4.69    0.40
  -1   8   0    4.29    0.34
  -1   8   0    4.26    0.37
   1   8   0    4.59    0.43
   1   8   0    4.19    0.40
  -1   8   0    4.30    0.41
  -2  -8   0    4.52    0.42
   2  -8   0    5.68    0.46
   2  -8   0    4.99    0.37
  -2  -8   0    5.51    0.47
   2  -8   0    5.50    0.51
   2  -8   0    5.65    0.41
  -2  -8   0    5.90    0.39
  -2  -8   0    5.68    0.36
  -2  -8   0    5.57    0.49
   2  -8   0    6.09    0.49
   2   8   0    4.74    0.36
   2   8   0    5.26    0.43
  -2   8   0    5.41    0.46
   2   8   0    5.62    0.51
  -2   8   0    4.93    0.44
  -2   8   0    5.37    0.48
   2   8   0    5.81    0.49
  -2   8   0    5.57    0.53
   2   8   0    5.31    0.41
   3  -8   0    1.77    0.36
   3  -8   0    1.96    0.33
  -3  -8   0    1.53    0.14
  -3  -8   0    2.10    0.40
   3  -8   0    1.25    0.28
  -3  -8   0    1.50    0.30
   3  -8   0    1.35    0.32
   3  -8   0    1.89    0.24
  -3  -8   0    1.51    0.28
  -3  -8   0    1.97    0.25
  -3   8   0    1.20    0.23
  -3   8   0    1.69    0.40
   3   8   0    1.84    0.34
  -3   8   0    0.98    0.27
  -3   8   0    1.73    0.31
   3   8   0    1.80    0.41
   3   8   0    1.53    0.25
   3   8   0    1.30    0.28
  -3   8   0    1.84    0.29
   4  -8   0   20.37    1.34
  -4  -8   0   20.23    1.34
  -4  -8   0   19.97    1.31
  -4  -8   0   23.01    1.30
   4  -8   0   22.88    1.27
   4  -8   0   20.71    1.35
   4  -8   0   20.75    1.37
   4  -8   0   22.97    1.33
  -4  -8   0   20.44    1.39
  -4   8   0   20.80    1.32
   4   8   0   19.88    1.35
  -4   8   0   19.72    1.31
  -4   8   0   21.88    1.36
   4   8   0   20.13    1.34
  -4   8   0   19.18    1.34
   4   8   0   20.38    1.35
  -4   8   0   18.19    1.27
   4   8   0   21.20    1.30
   5  -8   0    3.39    0.63
   5  -8   0    4.75    0.70
   5  -8   0    4.55    0.47
   5  -8   0    3.47    0.41
  -5  -8   0    4.67    0.56
   5  -8   0    4.05    0.59
  -5  -8   0    3.56    0.54
  -5  -8   0    2.66    0.50
  -5  -8   0    4.51    0.49
  -5   8   0    3.91    0.56
  -5   8   0    3.34    0.42
   5   8   0    3.45    0.55
   5   8   0    2.84    0.63
  -5   8   0    3.72    0.57
  -5   8   0    3.31    0.55
   5   8   0    3.45    0.45
  -5   8   0    4.63    0.71
   5   8   0    3.46    0.56
   6  -8   0   -0.17    0.62
   6  -8   0   -0.13    0.39
  -6  -8   0    0.29    0.43
  -6  -8   0    0.40    0.50
   6  -8   0    0.06    0.61
   6  -8   0   -0.18    0.46
   6  -8   0   -0.76    0.40
  -6   8   0   -0.59    0.36
  -6   8   0    0.01    0.56
   6   8   0   -0.21    0.37
   6   8   0    0.50    0.56
  -6   8   0    0.94    0.72
  -6   8   0   -0.13    0.25
  -6   8   0   -0.38    0.39
   6   8   0    0.41    0.30
   6   8   0   -0.18    0.55
   7  -8   0    0.20    0.80
  -7  -8   0    1.52    0.60
   7  -8   0    0.61    0.77
  -7  -8   0    1.77    0.77
   7  -8   0   -0.39    0.55
  -7  -8   0    0.20    0.82
   7  -8   0    0.06    0.82
  -7   8   0    0.53    0.51
  -7   8   0    0.09    0.54
  -7   8   0    1.57    0.67
   7   8   0   -0.82    0.87
  -7   8   0   -0.91    0.65
   8  -8   0    0.96    1.15
  -8  -8   0    3.06    1.11
  -8  -8   0   -1.11    0.76
  -8   8   0    0.89    1.01
  -8   8   0    0.52    0.60
   0  -9   0   -0.06    0.16
   0  -9   0   -0.13    0.25
   0  -9   0   -0.09    0.12
   0  -9   0   -0.18    0.13
   0   9   0   -0.01    0.19
   0   9   0   -0.08    0.18
   0   9   0   -0.14    0.10
   0   9   0   -0.06    0.20
   0   9   0   -0.04    0.14
  -1  -9   0   11.72    0.70
  -1  -9   0   11.48    0.80
  -1  -9   0   11.68    0.78
   1  -9   0   10.13    0.69
   1  -9   0   12.18    0.77
   1  -9   0   11.67    0.74
   1  -9   0   10.17    0.68
   1  -9   0   11.50    0.77
  -1  -9   0   12.64    0.70
  -1  -9   0   12.04    0.75
   1  -9   0   11.31    0.77
  -1   9   0   11.08    0.78
  -1   9   0   11.03    0.75
   1   9   0   11.34    0.75
  -1   9   0   11.61    0.79
  -1   9   0   11.06    0.77
   1   9   0   11.75    0.78
   1   9   0   10.69    0.71
   1   9   0   11.31    0.80
   1   9   0   10.18    0.70
  -2  -9   0   13.38    0.78
  -2  -9   0   13.68    0.88
  -2  -9   0   13.12    0.85
  -2  -9   0   13.93    0.81
  -2  -9   0   13.08    0.88
   2  -9   0   12.45    0.79
   2  -9   0   13.81    0.86
   2  -9   0   12.60    0.90
   2  -9   0   13.91    0.89
  -2   9   0   12.01    0.89
   2   9   0   13.27    0.90
   2   9   0   11.96    0.88
   2   9   0   11.91    0.78
   2   9   0   12.66    0.83
  -2   9   0   12.89    0.86
  -2   9   0   13.63    0.90
  -2   9   0   13.12    0.84
   3  -9   0    0.12    0.26
  -3  -9   0   -0.07    0.27
   3  -9   0    0.54    0.23
   3  -9   0    0.23    0.15
  -3  -9   0    0.08    0.24
   3  -9   0    0.30    0.31
   3  -9   0   -0.07    0.33
  -3  -9   0    0.24    0.08
  -3  -9   0    0.26    0.17
  -3  -9   0    0.28    0.19
  -3   9   0    0.24    0.39
   3   9   0   -0.10    0.28
   3   9   0    0.26    0.24
  -3   9   0    0.19    0.19
  -3   9   0    0.31    0.24
   3   9   0    0.25    0.32
  -3   9   0    0.42    0.34
   3   9   0    0.35    0.34
   4  -9   0    2.90    0.49
   4  -9   0    2.68    0.41
  -4  -9   0    2.75    0.37
  -4  -9   0    2.50    0.48
  -4  -9   0    2.33    0.35
   4  -9   0    3.20    0.36
  -4  -9   0    2.49    0.44
  -4   9   0    1.78    0.36
  -4   9   0    2.52    0.47
   4   9   0    2.37    0.46
  -4   9   0    2.96    0.65
  -4   9   0    2.53    0.49
   4   9   0    3.50    0.62
   4   9   0    2.13    0.35
   4   9   0    3.24    0.57
  -4   9   0    3.02    0.42
  -5  -9   0    1.55    0.69
   5  -9   0    1.07    0.43
  -5  -9   0    1.46    0.40
   5  -9   0    1.21    0.26
   5  -9   0    0.91    0.40
   5  -9   0    1.20    0.51
  -5  -9   0    1.05    0.57
   5  -9   0    1.57    0.57
  -5  -9   0    1.24    0.36
   5   9   0    0.68    0.29
  -5   9   0    1.13    0.31
   5   9   0    0.76    0.57
  -5   9   0    2.41    0.55
  -5   9   0    2.05    0.65
   5   9   0    1.22    0.46
  -5   9   0    1.43    0.42
  -5   9   0    1.18    0.34
   5   9   0    0.86    0.45
  -6  -9   0    1.89    0.46
   6  -9   0    1.27    0.64
   6  -9   0    1.37    0.80
  -6  -9   0    1.42    0.47
   6  -9   0    1.40    0.48
  -6  -9   0    0.95    0.50
   6  -9   0    0.70    0.48
   6  -9   0    1.48    0.50
   6   9   0    1.22    0.40
  -6   9   0    1.69    0.44
  -6   9   0    1.60    0.37
   6   9   0    1.34    0.52
  -6   9   0    2.25    0.70
   6   9   0    0.79    0.65
   6   9   0    1.26    0.41
  -6   9   0    0.46    0.83
  -6   9   0    0.44    0.40
   7  -9   0   -0.06    0.57
   7  -9   0    0.28    0.43
  -7  -9   0    0.78    0.55
  -7  -9   0   -0.81    0.49
   7   9   0   -0.43    0.65
  -7   9   0    1.81    0.75
  -7   9   0    0.20    0.62
  -7   9   0    0.25    0.47
  -7   9   0   -0.25    0.48
  -8  -9   0   -1.43    1.18
  -8   9   0    0.31    0.73
  -8   9   0    0.34    0.56
   0 -10   0    0.52    0.29
   0 -10   0    0.02    0.14
   0 -10   0    0.28    0.23
   0 -10   0    0.24    0.21
   0 -10   0    0.33    0.12
   0  10   0    0.10    0.20
   0  10   0   -0.14    0.20
  -1 -10   0    0.56    0.19
  -1 -10   0    0.46    0.32
   1 -10   0    0.59    0.13
   1 -10   0    0.77    0.14
   1 -10   0    0.50    0.24
   1 -10   0    0.31    0.18
   1 -10   0    0.85    0.33
  -1 -10   0    0.66    0.14
  -1 -10   0    0.64    0.26
   1 -10   0    0.98    0.26
   1  10   0    0.25    0.31
  -1  10   0    0.42    0.22
   1  10   0    0.48    0.15
   1  10   0    0.51    0.27
   1  10   0    0.47    0.23
  -1  10   0    0.74    0.28
  -1  10   0    0.67    0.24
  -2 -10   0    1.57    0.32
   2 -10   0    1.58    0.20
   2 -10   0    1.23    0.22
  -2 -10   0    1.49    0.25
   2 -10   0    1.79    0.32
   2 -10   0    1.10    0.24
  -2 -10   0    1.37    0.30
  -2 -10   0    1.46    0.19
   2 -10   0    1.80    0.33
   2 -10   0    1.58    0.30
  -2 -10   0    1.61    0.31
   2  10   0    1.34    0.24
  -2  10   0    1.75    0.30
   2  10   0    1.89    0.39
   2  10   0    1.64    0.28
   2  10   0    1.15    0.22
   2  10   0    1.50    0.31
  -2  10   0    1.47    0.26
  -2  10   0    1.87    0.41
  -2  10   0    1.38    0.24
   3 -10   0   -0.07    0.35
   3 -10   0   -0.09    0.16
   3 -10   0   -0.27    0.24
  -3 -10   0    0.25    0.40
  -3 -10   0    0.03    0.08
  -3 -10   0    0.05    0.20
   3 -10   0    0.00    0.20
   3 -10   0    0.27    0.31
  -3 -10   0    0.14    0.19
   3  10   0    0.22    0.39
  -3  10   0   -0.03    0.18
  -3  10   0   -0.40    0.28
   3  10   0   -0.15    0.35
   4 -10   0    0.06    0.32
   4 -10   0    0.16    0.22
  -4 -10   0    0.17    0.37
  -4 -10   0    0.20    0.39
  -4 -10   0    0.06    0.55
   4 -10   0    0.48    0.48
   4 -10   0    0.40    0.33
   4 -10   0   -0.19    0.23
  -4 -10   0    0.27    0.24
   4  10   0   -0.30    0.31
   4  10   0   -0.60    0.33
   4  10   0    0.13    0.42
  -4  10   0   -0.16    0.31
   4  10   0    0.14    0.39
  -4  10   0    0.43    0.39
  -4  10   0   -0.01    0.21
  -4  10   0   -0.26    0.33
  -5 -10   0    0.05    0.33
   5 -10   0    0.07    0.41
  -5 -10   0   -0.03    0.26
   5 -10   0    0.23    0.34
   5 -10   0    0.03    0.52
  -5 -10   0    0.35    0.90
   5 -10   0   -0.14    0.23
   5 -10   0    0.43    0.43
   5  10   0    0.24    0.60
   5  10   0    0.01    0.58
   5  10   0    0.19    0.36
   5  10   0   -0.20    0.40
  -5  10   0   -0.12    0.26
  -5  10   0    0.70    0.36
  -5  10   0    0.93    0.51
  -5  10   0   -0.41    0.36
  -5  10   0   -0.18    0.30
   6 -10   0   -0.38    0.41
   6 -10   0    1.02    0.76
  -6 -10   0   -0.63    0.77
   6 -10   0    0.25    0.38
   6 -10   0    0.47    0.78
  -6 -10   0   -0.44    0.46
  -6 -10   0    0.60    0.76
  -6  10   0    0.23    0.49
  -6  10   0    0.41    0.34
   6  10   0   -0.05    0.74
   6  10   0    0.27    0.62
   6  10   0    0.89    0.47
  -6  10   0   -0.45    0.58
  -6  10   0   -0.55    0.44
  -6  10   0    0.65    0.86
   7 -10   0   -0.13    0.94
   7 -10   0   -1.74    1.12
   7 -10   0   -1.04    0.82
   7 -10   0   -0.87    0.56
  -7 -10   0    0.02    0.55
  -7 -10   0    0.08    0.76
  -7  10   0    0.16    0.68
  -7  10   0    2.00    0.88
  -7  10   0    1.02    0.47
   7  10   0   -0.98    0.78
   0 -11   0   -0.06    0.18
   0 -11   0   -0.10    0.34
   0 -11   0    0.07    0.26
   0 -11   0    0.03    0.23
   0 -11   0    0.07    0.12
   0  11   0   -0.08    0.17
   0  11   0   -0.19    0.34
   0  11   0   -0.04    0.23
   0  11   0   -0.10    0.16
  -1 -11   0    3.11    0.34
   1 -11   0    2.24    0.35
  -1 -11   0    2.13    0.28
   1 -11   0    1.91    0.33
   1 -11   0    2.60    0.24
  -1 -11   0    2.64    0.49
   1 -11   0    2.57    0.39
  -1 -11   0    2.86    0.28
   1 -11   0    2.72    0.31
   1 -11   0    2.29    0.25
  -1 -11   0    2.27    0.35
   1  11   0    1.99    0.29
  -1  11   0    2.63    0.40
   1  11   0    3.11    0.44
   1  11   0    2.61    0.37
   1  11   0    2.09    0.29
  -1  11   0    2.41    0.31
  -1  11   0    3.06    0.46
  -1  11   0    2.65    0.42
   1  11   0    2.80    0.34
   2 -11   0    3.12    0.42
   2 -11   0    2.95    0.51
  -2 -11   0    2.99    0.29
   2 -11   0    3.57    0.41
  -2 -11   0    3.27    0.52
  -2 -11   0    3.77    0.34
   2 -11   0    3.18    0.47
   2 -11   0    3.06    0.29
   2 -11   0    2.55    0.30
  -2 -11   0    3.75    0.51
  -2 -11   0    3.06    0.49
  -2  11   0    3.02    0.51
   2  11   0    3.42    0.53
   2  11   0    3.55    0.33
  -2  11   0    4.03    0.47
  -2  11   0    3.61    0.52
   2  11   0    2.87    0.43
  -2  11   0    3.34    0.58
   2  11   0    2.63    0.30
  -3 -11   0    0.37    0.37
   3 -11   0    0.60    0.26
   3 -11   0   -0.18    0.39
  -3 -11   0    0.50    0.11
   3 -11   0    0.39    0.30
  -3 -11   0    0.42    0.49
   3 -11   0    0.42    0.20
  -3 -11   0   -0.10    0.24
  -3 -11   0    0.62    0.21
   3 -11   0    0.48    0.19
  -3  11   0    0.24    0.26
  -3  11   0    0.21    0.36
  -3  11   0    0.37    0.24
  -3  11   0   -0.11    0.50
   3  11   0   -0.01    0.30
   3  11   0    0.75    0.28
   4 -11   0    1.26    0.50
   4 -11   0    0.70    0.47
  -4 -11   0    1.19    0.47
  -4 -11   0    1.67    0.55
  -4 -11   0    0.83    0.29
  -4 -11   0    1.13    0.28
   4 -11   0    1.37    0.40
   4 -11   0    0.61    0.46
   4 -11   0    1.20    0.26
   4  11   0    0.21    0.30
   4  11   0    1.26    0.49
   4  11   0   -0.04    0.31
   4  11   0    0.61    0.37
  -4  11   0    0.79    0.43
  -4  11   0    1.41    0.62
  -4  11   0    0.64    0.28
  -4  11   0    0.74    0.38
  -5 -11   0    1.45    0.44
   5 -11   0    1.36    0.68
  -5 -11   0    1.29    0.46
   5 -11   0    0.85    0.71
   5 -11   0    0.64    0.26
   5 -11   0    0.06    0.29
  -5 -11   0    0.18    0.56
   5 -11   0   -0.25    0.46
  -5  11   0    0.56    0.71
  -5  11   0    2.42    0.85
   5  11   0    1.00    0.62
  -5  11   0    0.94    0.34
   5  11   0    0.07    0.50
   5  11   0   -0.19    0.43
  -5  11   0    0.43    0.45
  -5  11   0    0.79    0.32
   5  11   0    0.06    0.62
   6 -11   0    1.40    0.59
   6 -11   0    1.70    0.52
  -6 -11   0    1.31    0.49
  -6 -11   0    0.91    0.57
   6 -11   0    1.44    0.78
  -6 -11   0    2.77    1.00
   6 -11   0    0.40    0.46
   6  11   0    1.39    0.65
  -6  11   0    1.03    0.36
   6  11   0    0.37    0.86
  -6  11   0    1.21    0.61
  -6  11   0    1.24    0.89
  -6  11   0    1.61    0.60
   7 -11   0   -0.52    0.61
   7 -11   0   -1.06    0.65
  -7 -11   0    0.24    0.55
  -7 -11   0   -0.96    1.03
   7 -11   0    0.86    0.95
  -7  11   0   -0.10    0.58
  -7  11   0   -0.52    0.55
   0 -12   0    2.12    0.35
   0 -12   0    2.02    0.22
   0 -12   0    2.59    0.47
   0 -12   0    2.04    0.33
   0 -12   0    1.90    0.38
   0  12   0    1.53    0.32
   0  12   0    2.34    0.41
   0  12   0    2.04    0.38
   0  12   0    2.59    0.51
   1 -12   0    1.27    0.34
   1 -12   0    0.95    0.17
  -1 -12   0    0.91    0.21
   1 -12   0    1.02    0.33
  -1 -12   0    0.91    0.19
  -1 -12   0    0.73    0.29
   1 -12   0    0.70    0.28
  -1 -12   0    1.26    0.26
  -1 -12   0    1.33    0.44
   1 -12   0    0.76    0.14
   1 -12   0    0.85    0.20
   1  12   0    0.85    0.19
   1  12   0    1.00    0.34
  -1  12   0    1.20    0.32
  -1  12   0    0.99    0.37
   1  12   0    1.13    0.44
   1  12   0    0.77    0.21
  -1  12   0    0.79    0.27
  -1  12   0    0.67    0.31
  -2 -12   0   -0.01    0.35
   2 -12   0    0.08    0.13
   2 -12   0   -0.23    0.28
   2 -12   0    0.03    0.25
  -2 -12   0   -0.12    0.40
   2 -12   0   -0.29    0.21
   2 -12   0    0.12    0.29
   2 -12   0    0.05    0.13
  -2 -12   0   -0.09    0.14
  -2 -12   0    0.17    0.19
  -2 -12   0   -0.08    0.37
   2  12   0    0.16    0.32
   2  12   0   -0.20    0.22
   2  12   0   -0.30    0.20
  -2  12   0    0.36    0.39
  -2  12   0   -0.11    0.16
  -2  12   0    0.10    0.48
   2  12   0   -0.03    0.16
  -2  12   0   -0.10    0.27
   2  12   0    0.25    0.35
   3 -12   0   -0.50    0.35
  -3 -12   0   -0.12    0.18
  -3 -12   0   -0.57    0.31
   3 -12   0    0.04    0.25
   3 -12   0    0.31    0.19
   3 -12   0    0.31    0.41
   3 -12   0   -0.08    0.20
  -3 -12   0   -0.47    0.49
  -3 -12   0    0.06    0.11
  -3 -12   0   -0.04    0.40
   3  12   0   -0.19    0.35
  -3  12   0   -0.46    0.33
   3  12   0    0.48    0.36
  -3  12   0   -0.10    0.25
   3  12   0   -0.06    0.21
  -3  12   0   -0.16    0.61
  -3  12   0    0.38    0.18
  -4 -12   0    4.18    0.52
   4 -12   0    4.58    0.76
  -4 -12   0    4.20    0.49
  -4 -12   0    5.47    0.64
   4 -12   0    5.03    0.46
  -4 -12   0    3.63    0.70
   4 -12   0    4.03    1.27
   4 -12   0    5.42    0.67
  -4  12   0    4.62    0.50
  -4  12   0    3.47    0.67
   4  12   0    3.58    0.73
  -4  12   0    4.22    0.68
   4  12   0    3.55    0.50
   4  12   0    3.85    0.65
   4  12   0    3.85    0.73
  -4  12   0    4.48    0.85
   5 -12   0    2.70    0.40
   5 -12   0    4.19    0.73
  -5 -12   0    4.59    0.83
  -5 -12   0    3.03    0.75
  -5 -12   0    4.87    0.66
   5 -12   0    3.42    0.75
   5 -12   0    4.58    0.90
  -5 -12   0    4.53    0.97
   5  12   0    3.50    0.78
  -5  12   0    3.28    0.66
  -5  12   0    4.02    0.78
   5  12   0    3.65    0.61
   5  12   0    4.20    0.77
  -5  12   0    3.79    0.72
   5  12   0    2.50    0.59
  -5  12   0    4.01    0.84
   6 -12   0    0.95    0.44
  -6 -12   0    1.04    0.60
  -6 -12   0   -1.16    0.64
  -6 -12   0   -0.81    0.52
   6 -12   0   -1.32    0.92
   6 -12   0   -0.72    0.88
  -6 -12   0   -0.01    0.73
   6 -12   0   -0.28    0.46
  -6  12   0   -0.22    0.81
  -6  12   0    0.24    0.83
   6  12   0   -0.22    0.64
  -6  12   0    0.01    0.61
  -6  12   0   -0.20    0.51
   7 -12   0   -0.27    0.74
  -7 -12   0    0.20    0.61
  -7 -12   0    0.02    0.74
   7 -12   0    0.55    0.81
  -7  12   0    1.56    0.65
  -7  12   0    1.46    0.84
   0 -13   0   -0.20    0.27
   0 -13   0   -0.06    0.26
   0 -13   0    0.33    0.41
   0 -13   0   -0.04    0.16
   0 -13   0    0.10    0.12
   0  13   0    0.13    0.25
   0  13   0   -0.12    0.35
   0  13   0   -0.08    0.22
  -1 -13   0    3.72    0.35
  -1 -13   0    3.83    0.49
   1 -13   0    4.62    0.56
   1 -13   0    3.34    0.31
  -1 -13   0    4.79    0.62
  -1 -13   0    3.47    0.59
  -1 -13   0    3.54    0.35
   1 -13   0    3.36    0.57
   1 -13   0    3.73    0.33
   1 -13   0    3.45    0.37
   1  13   0    3.36    0.50
   1  13   0    2.86    0.54
  -1  13   0    3.10    0.48
   1  13   0    3.05    0.41
  -1  13   0    3.37    0.56
  -1  13   0    3.58    0.54
   1  13   0    3.14    0.38
  -2 -13   0    7.75    0.73
  -2 -13   0    7.86    0.82
   2 -13   0    6.78    0.54
   2 -13   0    8.72    0.80
   2 -13   0    9.26    0.68
  -2 -13   0    8.15    0.52
   2 -13   0    7.95    0.74
  -2 -13   0    7.28    0.79
   2 -13   0    7.43    0.52
   2 -13   0    7.65    0.69
  -2  13   0    7.72    0.62
   2  13   0    7.79    0.73
   2  13   0    7.91    0.85
   2  13   0    7.37    0.57
  -2  13   0    7.50    0.88
  -2  13   0    6.77    0.77
   2  13   0    7.13    0.60
   2  13   0    6.99    0.57
  -2  13   0    6.61    0.93
   3 -13   0    0.20    0.38
   3 -13   0    0.29    0.20
   3 -13   0    0.30    0.19
  -3 -13   0    0.01    0.68
  -3 -13   0    0.30    0.25
   3 -13   0    0.22    0.25
  -3 -13   0   -0.53    0.37
  -3 -13   0    0.28    0.23
  -3 -13   0    0.47    0.14
   3 -13   0   -0.05    0.52
   3 -13   0   -0.11    0.18
   3  13   0    0.40    0.51
   3  13   0    0.08    0.26
  -3  13   0    0.95    0.46
   3  13   0    0.58    0.53
  -3  13   0   -0.11    0.67
  -3  13   0    0.05    0.50
  -3  13   0    0.16    0.48
   4 -13   0    0.41    0.28
   4 -13   0    1.22    0.68
  -4 -13   0    0.08    0.59
  -4 -13   0    0.84    0.31
   4 -13   0    0.30    0.38
   4 -13   0    0.70    0.28
   4 -13   0    0.73    0.61
  -4 -13   0    1.34    0.54
   4  13   0    0.29    0.39
   4  13   0    0.49    0.54
  -4  13   0    1.03    0.47
   4  13   0    0.43    0.33
   4  13   0   -0.17    0.57
  -4  13   0    0.43    0.54
  -4  13   0    0.37    0.64
  -5 -13   0    1.06    0.51
   5 -13   0    2.25    0.76
  -5 -13   0    3.11    0.95
   5 -13   0    2.18    0.58
   5 -13   0    1.45    0.34
   5 -13   0    1.17    0.49
  -5  13   0    2.80    0.61
  -5  13   0    2.49    0.52
  -5  13   0    1.61    0.74
  -5  13   0    0.77    0.33
   5  13   0    2.24    0.84
   5  13   0    1.71    0.47
   5  13   0    2.66    0.48
   6 -13   0   -0.33    0.53
  -6 -13   0    0.54    0.94
   6 -13   0   -0.97    1.11
   6 -13   0    2.02    0.91
   6 -13   0   -0.03    0.45
  -6 -13   0    0.31    0.89
  -6 -13   0   -0.20    0.58
   6  13   0   -0.90    1.06
  -6  13   0    1.35    0.48
  -6  13   0    1.89    0.91
   7 -13   0    0.56    0.80
  -7 -13   0    2.35    0.66
  -7 -13   0    0.73    0.75
  -7  13   0   -1.02    0.72
  -7  13   0    0.88    1.08
   0 -14   0    6.44    0.77
   0 -14   0    6.83    0.46
   0 -14   0    6.48    0.56
   0 -14   0    7.44    0.71
   0 -14   0    7.14    0.74
   0  14   0    5.19    0.64
   0  14   0    6.50    0.58
   0  14   0    5.46    0.71
   0  14   0    6.01    0.60
   1 -14   0    4.33    0.38
  -1 -14   0    4.23    0.58
   1 -14   0    4.90    0.54
   1 -14   0    5.56    0.70
   1 -14   0    4.48    0.68
   1 -14   0    4.39    0.58
  -1 -14   0    4.60    0.38
   1 -14   0    4.33    0.37
  -1 -14   0    4.06    0.60
  -1 -14   0    3.90    0.47
  -1 -14   0    3.92    0.52
   1  14   0    3.57    0.38
   1  14   0    3.21    0.56
  -1  14   0    2.89    0.58
  -1  14   0    4.13    0.47
   1  14   0    3.70    0.47
   1  14   0    3.83    0.48
  -1  14   0    4.75    0.49
   1  14   0    4.62    0.51
  -1  14   0    3.37    0.49
  -2 -14   0    7.36    0.83
  -2 -14   0    7.75    0.52
  -2 -14   0    6.16    0.80
   2 -14   0    7.60    0.75
   2 -14   0    6.82    0.65
  -2 -14   0    7.64    0.86
   2 -14   0    6.05    0.74
   2 -14   0    5.21    1.15
   2 -14   0    6.17    0.49
   2 -14   0    6.77    0.50
  -2 -14   0    7.85    0.54
  -2  14   0    5.81    0.84
   2  14   0    6.53    0.59
  -2  14   0    6.64    0.66
   2  14   0    6.49    0.56
   2  14   0    5.34    0.60
  -2  14   0    6.42    0.92
   2  14   0    7.38    0.67
  -2  14   0    6.35    0.69
   2  14   0    6.28    0.62
   3 -14   0    0.10    0.41
   3 -14   0   -0.32    0.32
   3 -14   0   -0.15    0.22
  -3 -14   0    0.01    0.23
  -3 -14   0   -0.51    0.51
   3 -14   0    0.15    0.19
  -3 -14   0   -0.54    0.45
   3 -14   0   -0.41    0.46
  -3 -14   0    0.00    0.15
   3 -14   0   -0.38    0.50
  -3  14   0    0.17    0.25
  -3  14   0    0.36    0.58
   3  14   0   -0.08    0.32
   3  14   0    0.56    0.48
  -3  14   0    0.41    0.41
  -3  14   0   -0.42    0.70
   4 -14   0    0.74    0.27
  -4 -14   0   -0.64    0.63
  -4 -14   0   -0.32    0.27
   4 -14   0    0.27    0.63
  -4 -14   0    0.78    0.70
   4 -14   0    0.07    0.29
   4 -14   0   -0.30    0.53
   4 -14   0   -0.13    0.58
  -4 -14   0   -0.59    0.49
  -4  14   0    0.45    0.42
   4  14   0    0.64    0.60
   4  14   0    0.37    0.71
   4  14   0   -0.45    0.38
   4  14   0   -0.31    0.32
  -4  14   0    0.23    0.34
  -4  14   0    0.27    0.46
   5 -14   0   -0.17    0.44
   5 -14   0   -0.06    0.76
   5 -14   0   -0.24    0.53
  -5 -14   0   -0.51    0.75
  -5 -14   0    1.55    0.82
  -5 -14   0   -0.06    0.43
  -5  14   0   -0.23    0.69
   5  14   0    1.56    0.56
   5  14   0    0.55    0.48
  -5  14   0    0.57    1.20
  -6 -14   0    0.07    0.62
   6 -14   0   -0.54    1.42
   6 -14   0    0.33    0.93
   6 -14   0    0.04    0.91
  -6 -14   0   -0.84    0.95
  -6  14   0    0.17    0.64
  -6  14   0    1.17    0.47
   0 -15   0   -0.26    0.45
   0 -15   0    0.76    0.48
   0 -15   0    0.21    0.41
   0 -15   0    0.07    0.31
   0 -15   0    0.08    0.16
   0  15   0    0.08    0.49
   0  15   0   -0.26    0.42
   0  15   0   -0.25    0.30
   1 -15   0    3.28    0.35
   1 -15   0    3.57    0.35
  -1 -15   0    2.52    0.53
   1 -15   0    2.74    0.49
   1 -15   0    3.24    0.56
   1 -15   0    3.17    0.55
   1 -15   0    3.32    0.72
  -1 -15   0    3.22    0.34
  -1 -15   0    3.80    0.55
  -1 -15   0    3.31    0.58
  -1 -15   0    3.54    0.45
  -1  15   0    4.00    0.72
   1  15   0    2.50    0.40
  -1  15   0    3.06    0.53
  -1  15   0    3.22    0.46
   1  15   0    2.35    0.46
   1  15   0    4.58    0.75
   1  15   0    3.65    0.46
   1  15   0    3.84    0.74
  -1  15   0    3.23    0.70
   2 -15   0    1.42    0.26
   2 -15   0    1.90    0.45
   2 -15   0    2.20    0.39
  -2 -15   0    2.20    0.60
  -2 -15   0    2.18    0.37
  -2 -15   0    2.39    0.61
   2 -15   0    2.30    0.51
  -2 -15   0    1.97    0.36
   2 -15   0    1.43    0.53
  -2 -15   0    1.89    0.31
   2 -15   0    1.95    0.31
  -2  15   0    1.71    0.75
  -2  15   0    2.07    0.43
  -2  15   0    2.23    0.64
   2  15   0    1.43    0.35
   2  15   0    1.99    0.45
   2  15   0    2.16    0.72
  -2  15   0    1.99    0.58
   2  15   0    1.97    0.31
  -3 -15   0   -0.01    0.18
   3 -15   0    0.37    0.21
   3 -15   0    0.71    0.65
   3 -15   0    0.04    0.24
  -3 -15   0    1.00    0.62
  -3 -15   0   -0.11    0.26
   3 -15   0    0.22    0.39
   3 -15   0   -0.18    0.46
  -3 -15   0   -0.98    0.58
   3  15   0   -0.42    0.70
  -3  15   0   -0.21    0.78
   3  15   0   -0.34    0.48
  -3  15   0   -0.57    0.35
   3  15   0   -0.43    0.33
  -3  15   0    0.02    0.44
  -3  15   0    0.10    0.67
   4 -15   0    1.65    0.41
   4 -15   0    1.27    0.32
  -4 -15   0    1.53    0.61
   4 -15   0    1.56    0.61
   4 -15   0    1.04    0.53
  -4 -15   0    2.02    0.59
   4 -15   0    1.01    0.74
  -4 -15   0    1.09    0.52
   4  15   0   -0.09    0.77
  -4  15   0    2.28    0.73
   4  15   0    1.58    0.40
   4  15   0    2.55    0.60
  -4  15   0    1.53    0.57
  -4  15   0    2.34    0.60
  -5 -15   0   -0.25    0.38
   5 -15   0   -0.53    0.37
   5 -15   0   -0.49    0.46
   5 -15   0    0.19    0.80
   5 -15   0   -0.87    0.73
   5  15   0    0.81    0.48
  -5  15   0   -0.36    0.64
  -5  15   0    0.17    0.40
   5  15   0    2.01    0.75
  -5  15   0   -0.87    0.65
  -6 -15   0   -0.99    0.60
   6 -15   0    0.17    0.87
  -6 -15   0    0.25    0.68
   6 -15   0    0.61    0.63
  -6 -15   0   -0.71    1.49
  -6  15   0   -0.68    0.96
   0 -16   0    0.64    0.32
   0 -16   0    0.07    0.39
   0 -16   0    0.66    0.40
   0 -16   0    1.18    0.44
   0 -16   0    0.81    0.23
   0  16   0    0.11    0.35
   0  16   0    0.96    0.59
   0  16   0    0.23    0.53
  -1 -16   0    2.18    0.46
   1 -16   0    2.37    0.29
  -1 -16   0    3.01    0.37
   1 -16   0    2.55    0.59
   1 -16   0    2.27    0.35
  -1 -16   0    2.71    0.63
   1 -16   0    1.96    0.36
   1 -16   0    3.76    0.75
  -1 -16   0    2.55    0.55
   1 -16   0    3.10    0.68
  -1 -16   0    2.26    0.65
  -1  16   0    2.62    0.43
  -1  16   0    2.16    0.68
   1  16   0    1.62    0.47
  -1  16   0    2.17    0.58
   1  16   0    3.15    0.42
  -1  16   0    1.40    0.85
   1  16   0    2.13    0.82
   1  16   0    2.79    0.49
   2 -16   0   -0.60    0.42
  -2 -16   0   -1.05    0.56
   2 -16   0   -0.05    0.37
  -2 -16   0   -0.11    0.42
  -2 -16   0   -0.14    0.27
  -2 -16   0   -0.60    0.42
   2 -16   0   -0.30    0.61
   2 -16   0   -0.06    0.18
   2 -16   0    0.03    0.20
  -2  16   0   -0.56    0.69
  -2  16   0    0.21    0.61
   2  16   0   -0.62    0.38
   2  16   0   -0.27    0.31
  -2  16   0    0.32    0.63
  -2  16   0   -0.12    0.36
   2  16   0   -0.12    0.57
   2  16   0   -0.04    0.28
  -3 -16   0   -0.05    0.67
   3 -16   0   -0.02    0.68
  -3 -16   0   -0.23    0.20
   3 -16   0    0.02    0.56
  -3 -16   0   -0.32    0.64
  -3 -16   0   -1.15    0.69
  -3 -16   0   -0.15    0.28
   3 -16   0    0.49    0.22
  -3  16   0   -0.02    0.75
   3  16   0   -0.24    0.22
  -3  16   0   -0.62    0.43
  -3  16   0   -0.01    0.60
   3  16   0   -0.10    0.36
  -4 -16   0    1.77    0.41
   4 -16   0    1.63    0.34
   4 -16   0    1.26    0.32
   4 -16   0    1.94    0.74
   4 -16   0    1.36    0.70
  -4 -16   0    3.52    1.04
   4 -16   0    0.63    0.62
  -4 -16   0    1.54    0.75
  -4 -16   0    2.75    0.58
  -4  16   0    1.11    0.68
   4  16   0    0.43    0.63
   4  16   0    2.27    0.49
  -4  16   0    0.30    0.58
   4  16   0    2.56    0.78
  -5 -16   0   -0.53    0.46
   5 -16   0   -0.54    0.53
   5 -16   0   -0.11    0.42
  -5 -16   0    1.48    0.79
  -5 -16   0   -0.30    0.87
   5 -16   0   -0.87    0.91
  -5  16   0   -0.45    0.93
  -5  16   0   -1.71    1.07
  -5  16   0   -0.35    0.74
   0 -17   0    0.00    0.18
   0 -17   0    0.67    0.68
   0 -17   0    0.71    0.51
   0 -17   0    0.68    0.51
   0 -17   0   -0.27    0.35
   0  17   0   -0.46    0.36
   0  17   0    0.05    0.27
   1 -17   0    2.30    0.67
  -1 -17   0    0.79    0.87
   1 -17   0    1.06    0.45
   1 -17   0    1.25    0.25
   1 -17   0    1.04    0.55
  -1 -17   0    0.96    0.26
   1 -17   0    1.22    0.25
  -1 -17   0    1.16    0.37
  -1 -17   0    0.70    0.48
   1 -17   0    0.47    0.70
  -1 -17   0    1.32    0.55
   1  17   0    1.41    0.61
  -1  17   0    0.70    0.63
   1  17   0    0.61    0.41
   1  17   0    0.91    0.30
  -1  17   0    1.24    0.48
  -1  17   0    1.60    0.66
   2 -17   0    0.38    0.22
  -2 -17   0   -0.01    0.47
   2 -17   0   -0.34    0.60
   2 -17   0   -0.27    0.53
   2 -17   0    0.22    0.23
   2 -17   0   -0.28    0.67
  -2 -17   0    0.08    0.27
  -2 -17   0   -0.23    0.28
  -2 -17   0   -0.19    0.70
  -2 -17   0    0.56    0.67
   2 -17   0   -0.49    0.74
   2  17   0   -0.82    0.51
  -2  17   0   -0.04    0.47
  -2  17   0   -0.33    0.51
   2  17   0    0.18    0.33
  -2  17   0    0.03    0.42
   2  17   0    0.27    0.32
  -3 -17   0   -0.60    0.86
   3 -17   0   -0.74    0.79
   3 -17   0   -0.68    0.78
   3 -17   0    0.25    0.23
  -3 -17   0    0.60    0.51
  -3 -17   0   -0.31    0.71
  -3 -17   0   -0.20    0.25
  -3 -17   0   -0.14    0.28
   3 -17   0   -0.02    0.49
   3 -17   0   -0.31    0.22
   3  17   0   -0.49    0.45
  -3  17   0   -0.16    0.41
  -3  17   0   -0.45    0.71
  -3  17   0   -0.53    0.86
   3  17   0    0.84    0.57
   3  17   0   -0.21    0.25
  -4 -17   0    1.15    0.55
  -4 -17   0    1.47    1.09
   4 -17   0   -0.32    0.33
   4 -17   0   -1.19    0.85
   4 -17   0   -0.80    0.82
  -4 -17   0    0.38    0.49
   4 -17   0    0.96    0.60
  -4  17   0    1.28    0.47
  -4  17   0    1.73    0.65
  -4  17   0   -0.91    0.61
   4  17   0    1.17    0.46
  -5 -17   0   -0.70    1.05
   5 -17   0    0.17    0.99
   5 -17   0    0.15    0.91
  -5 -17   0   -0.84    0.52
   0 -18   0    6.40    0.86
   0 -18   0    9.39    1.17
   0 -18   0    6.66    0.59
   0 -18   0    6.98    0.54
   0 -18   0    7.24    1.20
   0 -18   0    8.56    1.08
   0  18   0    7.50    0.90
   0  18   0    6.54    0.75
   0  18   0    7.24    0.75
   1 -18   0    1.02    0.25
  -1 -18   0    0.95    0.57
  -1 -18   0    0.75    0.56
  -1 -18   0    0.49    0.41
   1 -18   0    1.32    0.87
  -1 -18   0    0.84    0.28
   1 -18   0    0.85    0.22
   1 -18   0    0.11    0.52
  -1 -18   0    0.45    0.59
  -1  18   0    0.63    0.51
   1  18   0    1.93    0.72
  -1  18   0   -0.53    0.59
   1  18   0    0.00    0.78
  -1  18   0    0.81    0.78
   2 -18   0    0.61    0.61
  -2 -18   0   -0.05    0.65
  -2 -18   0   -0.35    0.32
  -2 -18   0    0.13    0.25
  -2 -18   0    0.78    0.65
   2 -18   0    1.02    0.67
   2 -18   0   -1.27    0.84
   2 -18   0   -0.27    0.18
   2 -18   0    0.22    0.33
  -2 -18   0   -0.05    0.46
   2  18   0   -0.71    0.63
  -2  18   0   -0.59    0.53
   2  18   0    0.35    0.75
   2  18   0    0.06    0.36
   2  18   0    0.00    0.37
  -2  18   0    0.16    0.51
  -3 -18   0    0.13    0.80
  -3 -18   0    0.34    0.36
   3 -18   0   -1.12    0.86
  -3 -18   0   -1.30    1.02
   3 -18   0   -0.70    0.78
  -3  18   0   -1.56    0.99
   3  18   0    0.29    0.44
  -3  18   0   -0.93    0.60
  -3  18   0    0.55    0.57
   4 -18   0    0.64    0.59
  -4 -18   0    1.66    1.21
  -4 -18   0    0.59    0.58
  -4 -18   0   -0.08    0.47
   4 -18   0    0.12    0.86
  -4  18   0    0.08    0.88
  -4  18   0   -1.17    0.66
   0 -19   0    1.89    0.82
   0 -19   0    0.26    0.71
   0 -19   0    0.07    0.42
   0 -19   0    0.03    0.23
   0  19   0    1.25    0.54
   0  19   0   -0.46    0.87
   0  19   0    1.00    0.79
  -1 -19   0    0.68    0.45
   1 -19   0    1.78    0.83
  -1 -19   0    0.02    0.39
   1 -19   0    0.27    0.56
  -1 -19   0    1.03    0.28
  -1 -19   0    1.20    0.77
  -1  19   0    0.32    0.58
   1  19   0    0.78    0.67
  -1  19   0    0.47    0.86
  -1  19   0    0.84    0.46
   1  19   0    1.51    0.38
   1  19   0    2.04    0.75
  -2 -19   0    1.74    0.73
  -2 -19   0    0.40    0.30
   2 -19   0    0.68    0.83
   2 -19   0   -0.54    0.76
  -2 -19   0    0.58    0.94
  -2  19   0    0.98    0.89
   2  19   0    1.29    0.42
  -2  19   0    0.62    0.66
   2  19   0   -0.14    0.82
  -3 -19   0    0.18    0.46
  -3 -19   0   -0.91    0.89
   3 -19   0   -1.60    0.86
  -3 -19   0   -1.35    1.21
  -3  19   0   -0.52    0.58
  -3  19   0    0.10    0.93
  -4 -19   0    2.48    0.70
   4 -19   0    2.25    0.96
  -4 -19   0    1.01    1.98
  -4  19   0    1.79    1.15
   0 -20   0   19.80    1.59
   0 -20   0   19.94    1.48
   0 -20   0   18.75    1.49
   0  20   0   16.52    1.78
   0  20   0   18.25    1.34
  -1 -20   0    3.44    0.98
   1 -20   0    6.20    1.15
  -1 -20   0    5.53    1.30
  -1  20   0    5.36    0.72
   1  20   0    5.40    0.80
  -2 -20   0    2.23    1.20
  -2 -20   0    0.75    0.63
   2 -20   0    1.61    1.05
   2 -20   0    2.66    1.10
  -2  20   0    0.56    0.76
   2  20   0    1.57    0.48
  -2  20   0    1.20    1.29
  -3 -20   0   -0.72    0.93
   3 -20   0    0.36    1.04
  -3  20   0   -0.01    0.82
   0 -21   0    2.58    0.96
  -1 -21   0    4.17    0.95
   1 -21   0    1.91    0.66
  -1  21   0    2.77    0.79
  -8   0   1   -1.14    0.73
  -8   0   1    0.03    0.38
   8   0  -1    0.16    0.43
   8   0  -1   -0.74    0.84
  -8   0   1   -0.52    0.64
   7   0  -1   -0.03    0.68
  -7   0   1    0.73    0.56
   7   0  -1    0.43    0.70
   7   0  -1    0.43    0.71
   7   0  -1   -0.16    0.26
   7   0  -1   -0.40    0.76
  -7   0   1   -0.41    0.30
  -7   0   1   -0.01    0.25
  -7   0   1   -0.02    0.52
   6   0  -1    0.84    0.59
  -6   0   1   -0.22    0.22
   6   0  -1    0.24    0.32
   6   0  -1    0.65    0.63
   6   0  -1   -0.15    0.52
   6   0  -1    0.14    0.37
  -6   0   1   -0.34    0.27
  -6   0   1   -0.09    0.38
   6   0  -1    0.16    0.24
  -6   0   1    0.44    0.47
  -5   0   1    1.98    0.32
   5   0  -1    1.51    0.40
   5   0  -1    1.53    0.47
   4   0  -1    0.10    0.12
  -4   0   1   -0.23    0.19
  -4   0   1    0.00    0.16
   4   0  -1   -0.10    0.22
   4   0  -1   -0.11    0.15
   4   0  -1   -0.22    0.31
   4   0  -1    0.09    0.18
  -4   0   1    0.05    0.11
  -3   0   1    0.17    0.09
  -3   0   1    0.12    0.15
   3   0  -1    0.17    0.16
   3   0  -1    0.06    0.17
   3   0  -1    0.18    0.10
  -3   0   1   -0.04    0.10
   3   0  -1    0.13    0.13
   3   0  -1    0.02    0.25
  -2   0   1    0.09    0.09
   2   0  -1   -0.07    0.08
   2   0  -1    0.03    0.10
   2   0  -1   -0.24    0.15
  -2   0   1    0.06    0.08
   2   0  -1   -0.01    0.09
  -2   0   1    0.06    0.08
   2   0  -1    0.05    0.06
  -2   0   1    0.00    0.07
  -1   0   1   -0.02    0.04
   1   0  -1    0.02    0.05
  -1   0   1   -0.05    0.04
   1   0  -1    0.00    0.03
   0   0  -1   -0.06    0.05
   0   0  -1   -0.03    0.02
  -1   0  -1   -0.01    0.08
   1   0   1   -0.11    0.06
   1   0   1    0.06    0.06
  -1   0  -1   -0.04    0.07
  -1   0  -1   -0.02    0.07
   1   0   1   -0.11    0.06
  -2   0  -1    0.18    0.15
  -2   0  -1    0.18    0.10
   2   0   1    0.07    0.05
  -3   0  -1    0.04    0.08
   3   0   1   -0.19    0.14
  -3   0  -1   -0.04    0.17
  -3   0  -1   -0.06    0.10
   3   0   1    0.00    0.11
   3   0   1   -0.18    0.13
  -3   0  -1   -0.20    0.18
   3   0   1   -0.06    0.11
   4   0   1   -0.07    0.27
   4   0   1    0.08    0.19
  -4   0  -1    0.07    0.27
   4   0   1   -0.03    0.16
  -4   0  -1    0.08    0.17
  -4   0  -1   -0.06    0.13
  -4   0  -1    0.11    0.15
   4   0   1    0.00    0.25
   4   0   1   -0.06    0.20
   4   0   1    0.08    0.15
   5   0   1   -0.21    0.26
   5   0   1   -0.21    0.30
   5   0   1   -0.20    0.12
   5   0   1    0.32    0.36
   5   0   1   -0.22    0.20
  -5   0  -1   -0.05    0.34
  -5   0  -1   -0.05    0.20
   5   0   1   -0.03    0.27
  -6   0  -1    0.33    0.46
   6   0   1    0.35    0.46
   6   0   1    0.53    0.61
  -6   0  -1    0.07    0.17
   6   0   1   -0.40    0.40
  -6   0  -1    0.75    0.37
  -6   0  -1   -0.15    0.13
   6   0   1   -0.45    0.26
   6   0   1   -0.44    0.31
   7   0   1    0.28    0.40
  -7   0  -1    0.66    0.51
   7   0   1   -0.33    0.46
   7   0   1    0.26    0.36
   7   0   1    0.27    0.75
   7   0   1   -0.89    0.55
  -7   0  -1   -0.19    0.32
  -7   0  -1   -0.16    0.64
  -7   0  -1   -0.38    0.57
   7   0   1    0.03    0.59
   8   0   1    0.42    0.43
  -8   0  -1    0.72    0.56
   8   0   1    1.34    0.64
  -8   0  -1   -0.37    0.53
   8   0   1    0.10    1.05
  -8   0  -1    0.68    0.73
  -8   0  -1    0.27    0.42
   8   0   1    0.55    0.74
   8  -1  -1    1.92    0.84
   8  -1  -1    0.09    0.52
  -8  -1   1    0.26    0.38
  -8  -1   1    0.78    0.76
   8  -1  -1   -0.03    0.54
  -8   1   1    0.57    0.39
   8   1  -1    1.73    1.09
  -8   1   1    0.50    0.54
   8   1  -1    0.16    0.41
   7  -1  -1    1.35    0.78
   7  -1  -1    2.71    0.61
  -7  -1   1    2.44    0.42
   7  -1  -1    2.05    0.47
  -7  -1   1    1.94    0.43
   7  -1  -1    2.85    0.89
  -7  -1   1    2.16    0.51
  -7  -1   1    1.60    0.59
   7  -1  -1    2.72    0.75
  -7   1   1    1.84    0.60
  -7   1   1    2.02    0.38
   7   1  -1    1.10    0.47
  -7   1   1    2.37    0.56
  -7   1   1    1.97    0.63
   7   1  -1    3.02    0.87
   7   1  -1    1.74    0.41
   7   1  -1    2.12    0.62
  -6  -1   1    8.26    0.64
  -6  -1   1    7.81    0.82
   6  -1  -1    9.42    0.88
   6  -1  -1    7.69    1.00
   6  -1  -1    9.37    0.67
   6  -1  -1    9.09    0.74
  -6  -1   1    8.06    0.78
   6  -1  -1    8.32    0.92
   6  -1  -1    8.15    0.78
   6   1  -1    9.91    0.72
   6   1  -1    9.66    0.94
  -6   1   1    8.73    0.68
   6   1  -1    9.15    0.75
   6   1  -1    8.55    0.64
  -6   1   1    8.82    0.86
  -6   1   1    6.94    0.73
   6   1  -1    9.05    0.91
   6   1  -1    9.72    0.97
  -6   1   1    7.63    0.89
  -5  -1   1   50.04    2.85
   5  -1  -1   53.69    2.87
   5  -1  -1   47.77    2.93
  -5  -1   1   49.39    2.94
   5  -1  -1   57.68    2.92
  -5  -1   1   46.00    2.90
   5  -1  -1   49.00    2.98
  -5  -1   1   49.34    2.92
   5   1  -1   47.36    2.94
  -5   1   1   50.01    2.87
  -5   1   1   48.40    2.94
   5   1  -1   48.60    2.98
  -5   1   1   46.47    2.90
   5   1  -1   47.86    2.96
   5   1  -1   46.83    2.92
  -5   1   1   48.21    2.91
   5   1  -1   51.88    2.85
   5   1  -1   56.07    2.91
   4  -1  -1    2.37    0.46
   4  -1  -1    2.32    0.25
   4  -1  -1    1.37    0.25
  -4  -1   1    1.74    0.33
   4  -1  -1    2.32    0.41
  -4  -1   1    2.06    0.22
  -4  -1   1    1.86    0.32
  -4  -1   1    1.49    0.29
   4  -1  -1    1.37    0.27
   4   1  -1    1.59    0.29
  -4   1   1    1.56    0.27
  -4   1   1    1.67    0.26
  -4   1   1    1.45    0.27
   4   1  -1    1.89    0.38
   4   1  -1    2.12    0.22
   4   1  -1    1.94    0.33
  -4   1   1    2.30    0.26
  -3  -1   1   13.51    0.78
   3  -1  -1   12.81    0.82
  -3  -1   1   12.54    0.83
   3  -1  -1   13.62    0.84
   3  -1  -1   14.20    0.79
  -3  -1   1   13.67    0.83
   3  -1  -1   13.93    0.82
   3  -1  -1   13.24    0.90
  -3   1   1   12.46    0.82
  -3   1   1   12.25    0.83
  -3   1   1   12.98    0.79
   3   1  -1   13.11    0.82
  -3   1   1   13.30    0.84
   3   1  -1   11.42    0.86
   3   1  -1   13.50    0.84
   3   1  -1   14.19    0.83
   3   1  -1   13.90    0.78
  -2  -1   1   11.35    0.73
   2  -1  -1   12.83    0.72
   2  -1  -1   12.66    0.73
   2  -1  -1   11.55    0.78
   2  -1  -1   11.90    0.73
  -2  -1   1   11.88    0.73
   2  -1  -1   12.07    0.73
   2   1  -1   12.58    0.73
   2   1  -1   12.52    0.73
   2   1  -1   11.40    0.77
  -2   1   1   12.39    0.72
   2   1  -1   11.76    0.72
  -2   1   1   12.72    0.74
   2   1  -1   12.47    0.70
  -2   1   1   10.82    0.73
   1  -1  -1    4.93    0.31
  -1  -1   1    4.96    0.31
   1  -1  -1    4.67    0.33
   1  -1  -1    5.49    0.32
   1  -1  -1    5.44    0.33
  -1  -1   1    5.14    0.30
  -1  -1   1    4.65    0.32
   1  -1  -1    5.13    0.36
  -1  -1   1    5.48    0.31
   1   1  -1    4.93    0.31
  -1   1   1    5.06    0.31
   1   1  -1    5.45    0.31
  -1   1   1    4.76    0.36
   1   1  -1    4.46    0.35
  -1   1   1    4.53    0.32
   1   1  -1    5.21    0.30
  -1   1   1    5.17    0.33
   1   1  -1    4.90    0.32
   0  -1   1   60.44    3.59
   0  -1  -1   70.15    3.60
   0  -1  -1   61.78    3.60
   0  -1  -1   65.29    3.61
   0   1  -1   62.81    3.59
   0   1   1   58.35    3.61
   0   1   1   63.64    3.62
   0   1  -1   67.44    3.59
   0   1  -1   67.95    3.60
  -1  -1  -1   56.97    3.34
   1  -1   1   59.88    3.35
  -1  -1  -1   63.10    3.37
  -1  -1  -1   60.41    3.37
   1  -1   1   63.57    3.37
  -1  -1  -1   51.72    3.35
  -1  -1  -1   61.52    3.37
   1  -1   1   55.51    3.36
   1   1   1   61.83    3.37
  -1   1  -1   54.53    3.34
  -1   1  -1   59.93    3.36
  -1   1  -1   61.16    3.36
   1   1   1   56.61    3.34
   1   1   1   63.41    3.37
   1   1   1   59.38    3.36
  -1   1  -1   63.23    3.37
  -1   1  -1   62.66    3.37
  -2  -1  -1  184.52   11.03
  -2  -1  -1  176.43   11.05
   2  -1   1  202.02   11.04
  -2  -1  -1  212.21   11.05
   2  -1   1  182.44   11.04
  -2  -1  -1  196.25   11.06
   2  -1   1  205.36   11.07
   2  -1   1  205.94   11.07
  -2   1  -1  197.55   11.06
   2   1   1  207.37   11.07
   2   1   1  202.22   11.05
   2   1   1  198.77   11.06
  -2   1  -1  189.86   11.09
  -2   1  -1  200.88   11.04
   2   1   1  185.28   11.03
  -2   1  -1  210.18   11.04
  -3  -1  -1    5.65    0.38
  -3  -1  -1    5.57    0.47
   3  -1   1    4.93    0.41
   3  -1   1    5.80    0.40
  -3  -1  -1    6.46    0.42
   3  -1   1    5.54    0.48
   3  -1   1    5.74    0.43
   3  -1   1    4.76    0.40
  -3  -1  -1    4.94    0.42
  -3   1  -1    5.12    0.42
  -3   1  -1    5.99    0.38
  -3   1  -1    5.71    0.46
   3   1   1    4.94    0.38
   3   1   1    5.31    0.46
   3   1   1    5.31    0.47
   3   1   1    4.67    0.39
   3   1   1    5.99    0.40
  -3   1  -1    5.99    0.39
  -4  -1  -1    5.64    0.42
  -4  -1  -1    4.99    0.53
   4  -1   1    5.80    0.44
   4  -1   1    5.25    0.51
   4  -1   1    4.98    0.52
   4  -1   1    4.74    0.44
  -4  -1  -1    5.81    0.39
  -4  -1  -1    4.78    0.44
   4  -1   1    4.79    0.41
   4  -1   1    4.39    0.42
   4   1   1    5.18    0.52
   4   1   1    4.44    0.42
  -4   1  -1    4.48    0.43
  -4   1  -1    5.88    0.44
  -4   1  -1    5.57    0.53
   4   1   1    4.43    0.39
   4   1   1    4.43    0.52
  -4   1  -1    5.68    0.41
   4   1   1    4.46    0.45
  -5  -1  -1    2.76    0.52
  -5  -1  -1    2.96    0.36
   5  -1   1    2.47    0.40
   5  -1   1    1.72    0.48
   5  -1   1    2.02    0.40
  -5  -1  -1    2.58    0.50
   5  -1   1    2.33    0.40
   5  -1   1    2.71    0.40
   5  -1   1    2.07    0.37
  -5  -1  -1    2.67    0.32
   5   1   1    1.85    0.23
   5   1   1    1.59    0.36
  -5   1  -1    2.73    0.34
  -5   1  -1    1.95    0.39
   5   1   1    1.94    0.41
   5   1   1    2.67    0.51
  -5   1  -1    2.04    0.35
   5   1   1    2.89    0.45
  -5   1  -1    1.91    0.42
   6  -1   1    0.89    0.56
  -6  -1  -1    0.84    0.40
  -6  -1  -1    0.63    0.34
   6  -1   1    1.04    0.58
   6  -1   1    0.61    0.33
  -6  -1  -1    2.00    0.38
   6  -1   1    0.62    0.33
   6  -1   1    1.40    0.48
   6  -1   1    1.39    0.56
  -6   1  -1    1.39    0.52
   6   1   1    1.05    0.50
   6   1   1    1.37    0.42
   6   1   1    1.06    0.32
  -6   1  -1    1.08    0.50
  -6   1  -1    1.51    0.32
   6   1   1    0.46    0.32
   7  -1   1    1.33    0.54
  -7  -1  -1    1.87    0.54
   7  -1   1    2.06    0.57
   7  -1   1    0.93    0.61
  -7  -1  -1    1.00    0.32
   7  -1   1    2.01    0.50
  -7  -1  -1    2.38    0.58
  -7   1  -1    0.91    0.44
   7   1   1    1.26    0.50
   7   1   1    0.80    0.30
   7   1   1    1.23    0.47
  -7   1  -1    1.61    0.39
  -7   1  -1    0.82    0.46
   7   1   1    2.06    0.79
   7   1   1   -0.15    0.60
   7   1   1    1.39    0.55
  -7   1  -1    1.05    0.50
   8  -1   1    1.09    0.70
  -8  -1  -1    0.86    0.62
   8  -1   1    1.95    0.96
  -8  -1  -1    1.92    0.96
  -8  -1  -1    0.91    1.01
   8  -1   1    1.63    0.62
   8  -1   1    0.32    0.69
   8  -1   1    0.08    0.69
  -8  -1  -1    1.59    0.44
  -8   1  -1    1.60    0.47
   8   1   1    1.04    0.57
  -8   1  -1    1.89    0.61
   8   1   1    1.06    0.96
  -8   1  -1    2.60    0.99
   8   1   1    2.39    0.75
   8   1   1    1.12    0.83
  -8   1  -1   -0.05    0.97
   8  -2  -1   -0.10    1.02
   8  -2  -1   -0.02    0.34
  -8  -2   1   -0.17    0.38
   8  -2  -1   -1.08    0.94
  -8  -2   1   -0.05    0.46
  -8   2   1   -0.09    0.72
  -8   2   1   -0.18    0.49
   8   2  -1    1.02    0.71
   8   2  -1    0.57    0.89
  -8   2   1    0.24    0.40
   7  -2  -1    0.58    0.40
  -7  -2   1    0.15    0.43
  -7  -2   1    0.12    0.50
  -7  -2   1   -0.16    0.36
   7  -2  -1   -0.20    0.43
   7  -2  -1    0.20    0.69
   7  -2  -1    0.22    0.40
  -7  -2   1    0.16    0.26
   7  -2  -1    0.19    0.45
  -7   2   1    0.31    0.38
   7   2  -1    1.27    0.73
   7   2  -1    0.67    0.49
  -7   2   1    0.30    0.41
   7   2  -1    1.06    0.46
  -7   2   1    0.11    0.33
  -7   2   1    0.26    0.35
   7   2  -1    0.14    0.61
   7   2  -1    0.24    0.36
   6  -2  -1    9.51    0.82
  -6  -2   1   10.77    0.91
  -6  -2   1    9.31    0.85
   6  -2  -1    9.32    1.00
   6  -2  -1    9.93    0.74
   6  -2  -1    9.76    0.75
  -6  -2   1   10.22    0.68
   6  -2  -1    8.50    0.78
   6   2  -1   10.47    0.90
  -6   2   1    9.94    0.90
   6   2  -1    8.87    1.05
  -6   2   1    9.30    1.10
   6   2  -1    8.73    0.67
   6   2  -1    9.65    0.81
  -6   2   1    8.31    0.77
   6   2  -1    9.33    0.85
  -6   2   1    9.60    0.73
   6   2  -1   11.13    0.87
  -5  -2   1   39.28    2.33
  -5  -2   1   37.76    2.36
   5  -2  -1   41.19    2.36
  -5  -2   1   36.46    2.32
   5  -2  -1   42.57    2.30
   5  -2  -1   39.39    2.37
  -5  -2   1   38.91    2.26
   5  -2  -1   43.76    2.34
   5  -2  -1   38.66    2.41
   5   2  -1   38.96    2.35
  -5   2   1   36.33    2.33
   5   2  -1   39.49    2.26
  -5   2   1   38.22    2.30
   5   2  -1   39.18    2.37
   5   2  -1   43.95    2.35
   5   2  -1   38.79    2.40
  -5   2   1   35.90    2.33
  -5   2   1   38.80    2.37
  -4  -2   1    7.23    0.57
   4  -2  -1    7.33    0.67
  -4  -2   1    7.98    0.56
   4  -2  -1    9.10    0.55
   4  -2  -1    7.66    0.58
   4  -2  -1    7.17    0.57
   4  -2  -1    8.30    0.64
  -4  -2   1    7.86    0.61
  -4  -2   1    7.93    0.50
  -4   2   1    8.32    0.56
   4   2  -1    7.81    0.62
   4   2  -1    8.20    0.62
   4   2  -1    8.23    0.50
   4   2  -1    7.15    0.65
  -4   2   1    7.80    0.63
  -4   2   1    7.50    0.57
  -4   2   1    7.52    0.59
   3  -2  -1   18.08    1.19
   3  -2  -1   19.44    1.14
   3  -2  -1   18.63    1.13
   3  -2  -1   19.98    1.12
  -3  -2   1   18.43    1.13
  -3  -2   1   19.27    1.08
  -3  -2   1   18.55    1.14
   3  -2  -1   18.88    1.16
  -3   2   1   17.62    1.14
  -3   2   1   17.29    1.12
   3   2  -1   20.85    1.13
  -3   2   1   18.65    1.14
   3   2  -1   19.58    1.08
   3   2  -1   19.02    1.13
  -3   2   1   18.88    1.12
   3   2  -1   17.48    1.15
   3   2  -1   17.88    1.14
   2  -2  -1   23.08    1.37
   2  -2  -1   24.85    1.36
   2  -2  -1   23.02    1.37
   2  -2  -1   23.14    1.41
  -2  -2   1   24.21    1.37
  -2  -2   1   22.57    1.37
   2  -2  -1   24.34    1.38
  -2  -2   1   23.24    1.33
   2   2  -1   24.09    1.33
  -2   2   1   22.53    1.41
   2   2  -1   22.42    1.40
  -2   2   1   21.31    1.37
   2   2  -1   25.24    1.37
   2   2  -1   23.69    1.37
  -2   2   1   24.07    1.37
  -2   2   1   24.17    1.38
   2   2  -1   24.57    1.37
   1  -2  -1   78.96    4.45
  -1  -2   1   74.27    4.42
  -1  -2   1   77.99    4.45
   1  -2  -1   82.25    4.43
  -1  -2   1   80.33    4.42
   1  -2  -1   83.71    4.43
   1  -2  -1   75.23    4.43
  -1  -2   1   80.73    4.42
   1  -2  -1   80.52    4.43
  -1   2   1   69.97    4.43
   1   2  -1   78.49    4.42
  -1   2   1   78.28    4.43
  -1   2   1   79.51    4.43
   1   2  -1   82.50    4.45
   1   2  -1   77.73    4.42
   1   2  -1   79.52    4.42
  -1   2   1   80.23    4.46
   0  -2  -1   32.23    1.79
   0  -2   1   26.59    1.77
   0  -2  -1   34.64    1.80
   0  -2  -1   33.53    1.79
   0  -2   1   26.74    1.77
   0  -2  -1   30.70    1.79
   0  -2   1   30.47    1.78
   0  -2  -1   34.44    1.79
   0   2  -1   32.89    1.77
   0   2   1   29.31    1.79
   0   2  -1   30.29    1.79
   0   2   1   32.33    1.80
   0   2  -1   33.57    1.79
   0   2  -1   33.28    1.77
   1  -2   1  175.17   10.40
  -1  -2  -1  180.14   10.40
   1  -2   1  194.35   10.40
  -1  -2  -1  164.22   10.39
  -1  -2  -1  188.59   10.41
   1  -2   1  190.82   10.41
  -1  -2  -1  180.84   10.40
   1  -2   1  195.20   10.46
  -1   2  -1  189.23   10.40
  -1   2  -1  196.99   10.46
  -1   2  -1  187.70   10.40
   1   2   1  190.81   10.47
   1   2   1  192.32   10.41
   1   2   1  175.56   10.40
  -1   2  -1  190.84   10.40
   1   2   1  182.59   10.40
  -2  -2  -1  128.47    8.13
  -2  -2  -1  139.56    8.14
  -2  -2  -1  150.85    8.17
  -2  -2  -1  156.32    8.15
   2  -2   1  139.64    8.13
   2  -2   1  138.55    8.14
  -2  -2  -1  150.61    8.16
   2  -2   1  146.06    8.13
   2  -2   1  149.03    8.17
   2  -2   1  153.34    8.16
  -2   2  -1  150.37    8.16
   2   2   1  148.86    8.15
  -2   2  -1  149.44    8.14
  -2   2  -1  137.59    8.19
   2   2   1  132.39    8.13
   2   2   1  152.68    8.17
   2   2   1  153.16    8.17
  -2   2  -1  149.39    8.13
  -2   2  -1  133.12    8.13
  -3  -2  -1   28.07    1.50
   3  -2   1   27.34    1.53
   3  -2   1   24.00    1.48
   3  -2   1   24.33    1.49
   3  -2   1   25.69    1.48
   3  -2   1   23.81    1.53
  -3  -2  -1   25.08    1.52
  -3  -2  -1   25.91    1.47
  -3  -2  -1   23.59    1.52
  -3   2  -1   27.07    1.49
  -3   2  -1   24.44    1.51
   3   2   1   25.91    1.52
  -3   2  -1   25.50    1.53
  -3   2  -1   26.79    1.49
   3   2   1   23.85    1.53
   3   2   1   25.86    1.49
   3   2   1   23.40    1.48
   4  -2   1    0.33    0.25
  -4  -2  -1    0.06    0.17
   4  -2   1    0.31    0.23
   4  -2   1    0.21    0.26
  -4  -2  -1    0.31    0.14
  -4  -2  -1    0.25    0.29
  -4  -2  -1    0.16    0.19
   4  -2   1    0.17    0.11
   4  -2   1    0.10    0.13
   4   2   1    0.02    0.29
   4   2   1    0.14    0.14
  -4   2  -1    0.10    0.16
   4   2   1    0.42    0.27
   4   2   1    0.37    0.20
  -4   2  -1    0.25    0.25
  -4   2  -1    0.25    0.15
  -4   2  -1    0.31    0.19
   5  -2   1   -0.12    0.22
   5  -2   1    0.33    0.24
  -5  -2  -1   -0.10    0.30
  -5  -2  -1    0.19    0.18
  -5  -2  -1    0.20    0.40
  -5  -2  -1   -0.06    0.23
   5  -2   1    0.11    0.32
   5  -2   1    0.30    0.25
   5  -2   1    0.18    0.24
  -5   2  -1   -0.19    0.27
   5   2   1    0.07    0.23
   5   2   1    0.24    0.36
   5   2   1    0.03    0.25
   5   2   1   -0.44    0.37
  -5   2  -1    0.64    0.25
  -5   2  -1    0.09    0.20
  -5   2  -1   -0.14    0.20
   6  -2   1   14.29    1.06
   6  -2   1   11.89    1.30
   6  -2   1   11.44    0.96
   6  -2   1   13.94    1.00
  -6  -2  -1   14.44    1.14
  -6  -2  -1   11.94    1.09
  -6  -2  -1   11.17    1.11
   6  -2   1   13.42    1.05
  -6  -2  -1   15.27    0.90
   6  -2   1   13.48    1.02
  -6   2  -1   14.54    1.02
   6   2   1   14.64    1.17
   6   2   1   12.75    0.99
  -6   2  -1   12.06    1.07
   6   2   1   12.96    0.96
   6   2   1   12.85    1.04
   6   2   1   14.84    1.20
  -6   2  -1   14.19    1.01
   7  -2   1    4.94    0.53
   7  -2   1    5.35    0.82
   7  -2   1    4.36    0.81
  -7  -2  -1    5.10    0.87
   7  -2   1    5.31    1.00
  -7  -2  -1    5.71    0.69
  -7  -2  -1    5.11    0.54
  -7  -2  -1    4.76    0.72
   7  -2   1    6.02    0.64
   7  -2   1    7.07    0.96
   7   2   1    6.14    0.77
   7   2   1    4.38    0.68
  -7   2  -1    6.34    0.99
  -7   2  -1    5.12    0.65
   7   2   1    5.45    0.82
   7   2   1    4.20    0.62
   7   2   1    5.80    0.88
  -7   2  -1    5.16    0.61
   8  -2   1    2.07    1.11
  -8  -2  -1    2.36    0.45
  -8  -2  -1    2.76    0.73
   8  -2   1    2.39    0.73
   8  -2   1    2.86    0.87
   8  -2   1    1.22    0.74
  -8  -2  -1    1.83    0.63
   8   2   1    1.32    0.77
  -8   2  -1    2.37    0.90
   8   2   1    1.54    1.10
   8   2   1    2.44    0.49
   8   2   1    1.77    0.70
  -8   2  -1    1.06    0.89
  -8   2  -1    2.09    0.46
   8   2   1    1.76    1.14
  -8   2  -1    2.03    0.70
  -8  -3   1    0.51    0.30
  -8  -3   1   -0.93    0.55
  -8  -3   1   -0.62    0.78
   8  -3  -1   -0.53    0.89
   8  -3  -1    0.31    0.62
  -8   3   1    0.70    0.41
   8   3  -1    1.78    0.96
  -8   3   1    0.18    0.67
   7  -3  -1    1.02    0.79
   7  -3  -1    0.68    0.73
   7  -3  -1    0.28    0.67
   7  -3  -1    1.25    0.60
  -7  -3   1    0.41    0.43
   7  -3  -1    0.54    0.25
  -7  -3   1    0.45    0.27
  -7  -3   1    0.62    0.61
   7  -3  -1    0.59    0.58
  -7  -3   1    0.50    0.61
  -7   3   1    0.20    0.39
   7   3  -1   -0.55    0.75
  -7   3   1    0.27    0.58
   7   3  -1   -0.15    0.65
   7   3  -1    0.32    0.68
  -7   3   1   -0.32    0.59
   7   3  -1    0.95    0.71
  -7   3   1   -0.19    0.37
  -6  -3   1    5.90    0.74
   6  -3  -1    7.72    0.88
  -6  -3   1    7.02    0.64
   6  -3  -1    6.83    0.63
   6  -3  -1    7.24    0.88
   6  -3  -1    6.93    0.63
   6  -3  -1    5.75    0.83
  -6  -3   1    6.69    0.51
   6   3  -1    6.61    0.65
  -6   3   1    6.52    0.55
   6   3  -1    6.34    0.72
   6   3  -1    6.29    0.79
  -6   3   1    7.39    0.81
   6   3  -1    5.82    0.52
  -6   3   1    7.71    0.67
  -6   3   1    6.77    0.74
  -5  -3   1    0.82    0.33
  -5  -3   1    0.51    0.22
   5  -3  -1    0.63    0.19
   5  -3  -1    0.85    0.40
   5  -3  -1    0.11    0.37
   5  -3  -1    0.69    0.26
   5  -3  -1    0.55    0.38
   5   3  -1    0.67    0.34
  -5   3   1    0.28    0.29
   5   3  -1    0.93    0.25
  -5   3   1    0.75    0.34
   5   3  -1    1.20    0.50
   5   3  -1    0.28    0.27
  -4  -3   1   29.16    1.88
  -4  -3   1   31.60    1.89
  -4  -3   1   32.72    1.80
   4  -3  -1   33.88    1.85
   4  -3  -1   30.91    1.93
  -4  -3   1   31.59    1.88
   4  -3  -1   31.87    1.90
   4   3  -1   31.70    1.93
   4   3  -1   31.86    1.88
  -4   3   1   31.17    1.88
  -4   3   1   29.38    1.86
  -4   3   1   31.82    1.90
   4   3  -1   31.68    1.80
   4   3  -1   32.84    1.90
  -4   3   1   31.81    1.86
  -3  -3   1   21.15    1.30
   3  -3  -1   22.36    1.31
   3  -3  -1   21.32    1.31
  -3  -3   1   20.56    1.24
   3  -3  -1   23.22    1.33
  -3  -3   1   22.02    1.30
   3  -3  -1   21.62    1.36
   3  -3  -1   23.04    1.29
   3   3  -1   23.65    1.30
  -3   3   1   20.10    1.30
   3   3  -1   22.43    1.23
  -3   3   1   21.91    1.31
   3   3  -1   22.55    1.32
  -3   3   1   20.26    1.34
  -3   3   1   21.36    1.29
   3   3  -1   21.62    1.35
  -3   3   1   20.89    1.31
   3   3  -1   21.83    1.30
   2  -3  -1    9.29    0.54
  -2  -3   1    8.54    0.55
  -2  -3   1    8.60    0.58
   2  -3  -1    8.58    0.59
   2  -3  -1    9.16    0.58
   2  -3  -1    8.30    0.55
  -2  -3   1    9.04    0.55
   2  -3  -1    8.24    0.55
  -2   3   1    8.96    0.56
   2   3  -1    8.80    0.49
  -2   3   1    8.55    0.55
  -2   3   1    7.95    0.55
   2   3  -1    8.94    0.55
  -2   3   1    8.57    0.55
  -2   3   1    8.12    0.58
   2   3  -1    8.74    0.55
   2   3  -1    8.23    0.57
   2   3  -1    9.31    0.54
   1  -3  -1   15.12    0.87
   1  -3  -1   14.54    0.86
  -1  -3   1   15.39    0.85
  -1  -3   1   14.22    0.84
  -1  -3   1   12.39    0.84
  -1  -3   1   14.54    0.89
   1  -3  -1   13.27    0.86
   1  -3  -1   16.41    0.89
   1  -3  -1   15.63    0.87
   1   3  -1   13.87    0.83
  -1   3   1   14.83    0.86
  -1   3   1   14.36    0.87
   1   3  -1   14.69    0.85
   1   3  -1   15.68    0.85
  -1   3   1   14.54    0.89
  -1   3   1   13.83    0.89
   1   3  -1   14.89    0.85
   0  -3  -1  138.27    8.66
   0  -3  -1  152.42    8.66
   0  -3   1  155.21    8.65
   0  -3   1  158.75    8.67
   0  -3  -1  158.27    8.67
   0  -3   1  148.37    8.65
   0  -3  -1  159.64    8.67
   0  -3  -1  159.17    8.67
   0   3   1  155.21    8.66
   0   3  -1  159.92    8.67
   0   3   1  159.03    8.66
   0   3   1  133.56    8.66
   0   3  -1  156.67    8.65
   0   3   1  152.40    8.66
   0   3  -1  157.48    8.67
   0   3  -1  164.92    8.65
   0   3   1  154.85    8.67
   0   3  -1  161.57    8.65
   1  -3   1  970.36   51.43
  -1  -3  -1  848.15   51.40
  -1  -3  -1  975.78   51.50
   1  -3   1  834.55   51.38
   1  -3   1  855.96   51.29
  -1  -3  -1  979.90   51.51
   1  -3   1  930.01   51.44
   1  -3   1  902.15   51.59
  -1  -3  -1  888.46   51.46
  -1  -3  -1  879.40   51.43
  -1   3  -1  983.48   51.45
   1   3   1  946.52   51.46
  -1   3  -1 1000.00   51.48
  -1   3  -1  976.17   51.31
  -1   3  -1  972.36   51.48
   1   3   1  832.55   51.43
   1   3   1  864.50   51.42
  -1   3  -1  894.44   51.39
   2  -3   1   26.01    1.53
   2  -3   1   26.01    1.50
  -2  -3  -1   22.20    1.48
  -2  -3  -1   28.64    1.51
   2  -3   1   25.32    1.50
   2  -3   1   27.97    1.49
  -2  -3  -1   25.28    1.51
   2  -3   1   25.35    1.52
  -2  -3  -1   25.90    1.53
  -2   3  -1   28.22    1.49
   2   3   1   26.73    1.51
  -2   3  -1   23.89    1.50
   2   3   1   24.50    1.50
   2   3   1   26.32    1.53
  -2   3  -1   25.50    1.52
  -2   3  -1   28.17    1.51
  -2   3  -1   25.51    1.56
   2   3   1   25.47    1.52
  -3  -3  -1   46.12    2.85
   3  -3   1   47.23    2.83
   3  -3   1   52.08    2.82
  -3  -3  -1   49.79    2.86
  -3  -3  -1   46.62    2.83
   3  -3   1   48.06    2.83
   3  -3   1   51.14    2.86
   3  -3   1   49.40    2.86
  -3  -3  -1   54.32    2.84
  -3  -3  -1   48.03    2.80
  -3   3  -1   44.87    2.83
  -3   3  -1   48.18    2.85
   3   3   1   52.39    2.84
   3   3   1   51.33    2.86
  -3   3  -1   51.69    2.83
  -3   3  -1   50.80    2.87
  -3   3  -1   51.50    2.82
   3   3   1   46.95    2.82
   3   3   1   48.58    2.86
  -4  -3  -1    0.38    0.31
   4  -3   1    0.40    0.16
  -4  -3  -1    0.79    0.15
   4  -3   1    0.73    0.31
   4  -3   1    0.68    0.24
  -4  -3  -1    0.45    0.17
  -4  -3  -1    0.73    0.24
   4  -3   1    0.34    0.27
   4  -3   1    0.92    0.22
   4   3   1    0.63    0.24
  -4   3  -1    0.64    0.16
  -4   3  -1    0.59    0.29
  -4   3  -1    0.42    0.16
   4   3   1    0.79    0.32
   4   3   1    0.57    0.28
  -4   3  -1    0.51    0.23
   4   3   1    0.50    0.18
   5  -3   1    2.31    0.40
  -5  -3  -1    2.22    0.40
   5  -3   1    2.11    0.47
  -5  -3  -1    1.96    0.29
   5  -3   1    1.82    0.32
  -5  -3  -1    2.26    0.46
   5  -3   1    1.93    0.42
   5  -3   1    1.35    0.27
   5   3   1    1.93    0.37
   5   3   1    1.90    0.45
   5   3   1    2.53    0.44
   5   3   1    1.61    0.32
  -5   3  -1    2.13    0.42
  -5   3  -1    2.05    0.45
  -5   3  -1    1.95    0.38
  -5   3  -1    2.22    0.29
   6  -3   1    9.70    0.88
  -6  -3  -1   11.65    1.04
  -6  -3  -1   10.69    1.01
  -6  -3  -1   12.01    0.78
  -6  -3  -1   11.06    0.84
   6  -3   1   11.34    0.95
   6  -3   1   12.48    0.90
   6  -3   1   11.41    1.03
   6  -3   1   11.68    0.89
   6   3   1   10.97    0.85
  -6   3  -1   11.21    1.00
  -6   3  -1   12.83    0.87
  -6   3  -1   10.82    0.83
   6   3   1   11.07    1.05
   6   3   1   11.24    0.95
   6   3   1   10.69    0.89
  -6   3  -1   10.53    0.88
   7  -3   1    1.29    0.66
  -7  -3  -1    0.65    0.69
   7  -3   1    0.81    0.57
   7  -3   1    0.50    0.61
  -7  -3  -1    0.56    0.27
  -7  -3  -1    1.00    0.68
  -7  -3  -1    0.54    0.34
   7  -3   1   -0.57    0.46
   7  -3   1    0.45    0.41
   7   3   1    1.24    0.55
  -7   3  -1   -0.19    0.52
  -7   3  -1    0.43    0.69
   7   3   1    0.89    0.66
  -7   3  -1    0.75    0.50
   7   3   1    1.71    0.82
  -7   3  -1    0.46    0.48
   8  -3   1    1.56    0.74
  -8  -3  -1    0.67    0.99
  -8  -3  -1    1.17    0.39
   8  -3   1    2.41    0.72
  -8  -3  -1    1.85    0.74
   8  -3   1    1.35    0.82
  -8   3  -1    2.37    0.50
  -8   3  -1    1.74    0.50
  -8   3  -1    2.25    0.62
   8   3   1    1.26    0.64
   8   3   1   -0.01    0.90
   8   3   1   -0.11    0.98
   8  -4  -1    0.78    0.61
   8  -4  -1   -1.36    1.24
  -8  -4   1    1.00    0.49
  -8  -4   1    0.07    0.55
   8   4  -1    1.88    1.07
  -8   4   1    0.29    0.83
  -8   4   1   -0.01    0.52
  -8   4   1    0.58    0.42
  -7  -4   1   -0.37    0.33
  -7  -4   1    0.38    0.20
  -7  -4   1   -0.30    0.51
   7  -4  -1    0.29    0.43
   7  -4  -1   -0.30    0.79
  -7  -4   1    0.56    0.44
   7   4  -1    0.55    0.42
   7   4  -1    0.04    0.45
   7   4  -1   -0.01    0.20
   7   4  -1    0.96    0.87
  -7   4   1   -0.23    0.49
  -7   4   1   -0.63    0.53
  -7   4   1   -0.06    0.55
  -6  -4   1    0.39    0.28
  -6  -4   1    0.06    0.29
  -6  -4   1    0.04    0.17
   6  -4  -1   -0.12    0.31
   6  -4  -1    0.34    0.35
  -6  -4   1    0.56    0.28
   6  -4  -1   -0.01    0.51
   6  -4  -1   -0.08    0.52
   6  -4  -1   -0.24    0.34
   6   4  -1   -0.19    0.34
  -6   4   1    0.09    0.38
  -6   4   1    0.06    0.30
   6   4  -1    0.33    0.33
   6   4  -1    0.46    0.55
   6   4  -1    0.02    0.17
  -6   4   1   -0.49    0.53
   5  -4  -1   19.64    1.26
  -5  -4   1   20.13    1.13
   5  -4  -1   20.63    1.36
   5  -4  -1   21.29    1.24
   5  -4  -1   21.91    1.23
  -5  -4   1   18.75    1.25
   5  -4  -1   17.62    1.30
  -5  -4   1   17.40    1.22
  -5  -4   1   20.36    1.27
   5   4  -1   19.07    1.35
   5   4  -1   18.32    1.25
   5   4  -1   18.91    1.26
  -5   4   1   19.01    1.28
  -5   4   1   18.35    1.29
   5   4  -1   21.76    1.26
  -5   4   1   20.38    1.23
  -5   4   1   18.02    1.26
   5   4  -1   16.58    1.12
   4  -4  -1   19.84    1.24
  -4  -4   1   19.88    1.24
   4  -4  -1   19.79    1.41
  -4  -4   1   19.25    1.22
   4  -4  -1   21.43    1.19
   4  -4  -1   20.47    1.26
  -4  -4   1   18.61    1.24
   4  -4  -1   19.25    1.27
  -4   4   1   19.03    1.31
   4   4  -1   16.94    1.11
  -4   4   1   18.42    1.20
  -4   4   1   19.95    1.21
  -4   4   1   19.53    1.23
   4   4  -1   21.19    1.21
   4   4  -1   19.85    1.25
  -4   4   1   19.70    1.25
  -3  -4   1   32.27    1.85
  -3  -4   1   32.48    1.86
   3  -4  -1   34.84    1.85
  -3  -4   1   30.95    1.90
   3  -4  -1   31.42    1.91
   3  -4  -1   29.51    1.91
   3  -4  -1   32.05    1.85
   3  -4  -1   32.95    1.88
  -3   4   1   31.67    1.87
  -3   4   1   30.10    1.84
  -3   4   1   29.96    1.86
   3   4  -1   32.31    1.86
  -3   4   1   29.28    1.91
  -3   4   1   28.87    1.85
   3   4  -1   31.07    1.89
   3   4  -1   31.51    1.86
   3   4  -1   36.39    1.86
   2  -4  -1    9.38    0.58
  -2  -4   1    8.70    0.55
   2  -4  -1    8.36    0.57
   2  -4  -1    8.64    0.62
  -2  -4   1    9.41    0.56
  -2  -4   1    8.44    0.61
   2  -4  -1    9.82    0.58
   2  -4  -1    8.24    0.56
  -2   4   1    7.52    0.56
   2   4  -1    8.42    0.60
  -2   4   1    8.94    0.64
  -2   4   1    8.94    0.58
   2   4  -1    9.16    0.55
   2   4  -1    9.11    0.56
  -2   4   1    8.63    0.57
   2   4  -1    8.83    0.56
  -2   4   1    8.67    0.58
   1  -4  -1    6.33    0.41
  -1  -4   1    5.97    0.42
  -1  -4   1    5.45    0.36
   1  -4  -1    5.25    0.39
  -1  -4   1    6.08    0.38
   1  -4  -1    6.55    0.42
   1  -4  -1    6.09    0.41
  -1  -4   1    6.26    0.39
   1  -4  -1    6.59    0.45
   1   4  -1    6.80    0.38
  -1   4   1    5.94    0.41
  -1   4   1    5.83    0.41
  -1   4   1    5.94    0.45
   1   4  -1    5.93    0.39
   1   4  -1    6.18    0.39
   1   4  -1    6.59    0.36
   1   4  -1    5.88    0.43
  -1   4   1    5.80    0.40
   0  -4  -1  351.87   20.87
   0  -4   1  367.55   20.93
   0  -4   1  386.69   20.98
   0  -4  -1  382.71   21.00
   0  -4  -1  387.27   21.01
   0  -4  -1  326.49   20.93
   0  -4   1  378.03   21.04
   0  -4  -1  382.64   21.01
   0   4  -1  383.73   21.04
   0   4  -1  413.00   20.97
   0   4   1  345.01   20.89
   0   4   1  321.59   20.96
   0   4   1  376.41   20.98
   0   4   1  376.47   20.96
   0   4  -1  379.43   20.85
   0   4  -1  387.33   20.97
   0   4  -1  386.19   20.92
   0   4   1  392.49   21.02
   1  -4   1  254.51   14.38
   1  -4   1  265.15   14.38
   1  -4   1  276.20   14.41
  -1  -4  -1  244.43   14.37
  -1  -4  -1  239.16   14.37
   1  -4   1  268.44   14.48
  -1  -4  -1  260.01   14.49
   1  -4   1  251.25   14.37
  -1  -4  -1  259.10   14.39
   1   4   1  266.09   14.47
  -1   4  -1  264.84   14.38
  -1   4  -1  266.99   14.37
   1   4   1  254.30   14.38
  -1   4  -1  257.35   14.38
  -1   4  -1  268.75   14.47
   1   4   1  256.51   14.39
   1   4   1  230.54   14.37
   1   4   1  230.17   14.37
  -1   4  -1  271.05   14.39
   2  -4   1   31.15    1.83
   2  -4   1   32.73    1.78
  -2  -4  -1   28.11    1.79
  -2  -4  -1   34.53    1.82
   2  -4   1   30.87    1.80
   2  -4   1   31.26    1.80
   2  -4   1   32.54    1.84
  -2  -4  -1   32.34    1.84
  -2  -4  -1   31.42    1.82
  -2  -4  -1   30.27    1.82
  -2   4  -1   33.65    1.81
  -2   4  -1   29.80    1.82
   2   4   1   29.33    1.82
   2   4   1   32.07    1.83
  -2   4  -1   31.34    1.78
   2   4   1   30.01    1.81
  -2   4  -1   30.28    1.81
   2   4   1   31.44    1.82
  -3  -4  -1    0.84    0.17
  -3  -4  -1    1.01    0.18
  -3  -4  -1    0.68    0.19
   3  -4   1    1.18    0.25
   3  -4   1    0.71    0.17
   3  -4   1    0.78    0.15
   3  -4   1    0.69    0.25
  -3  -4  -1    1.07    0.21
   3  -4   1    0.83    0.14
  -3   4  -1    0.85    0.18
  -3   4  -1    0.75    0.22
  -3   4  -1    0.73    0.16
  -3   4  -1    0.86    0.16
   3   4   1    0.98    0.18
   3   4   1    0.80    0.16
   3   4   1    0.72    0.17
  -3   4  -1    0.92    0.22
   3   4   1    1.02    0.15
   4  -4   1   -0.07    0.12
  -4  -4  -1   -0.14    0.23
   4  -4   1    0.20    0.29
  -4  -4  -1   -0.25    0.29
  -4  -4  -1   -0.25    0.25
   4  -4   1   -0.15    0.19
  -4  -4  -1   -0.09    0.11
  -4  -4  -1   -0.18    0.17
   4  -4   1    0.05    0.23
  -4   4  -1   -0.11    0.25
  -4   4  -1   -0.14    0.18
   4   4   1   -0.10    0.20
  -4   4  -1    0.31    0.23
   4   4   1    0.15    0.20
  -4   4  -1   -0.14    0.17
   4   4   1    0.10    0.08
  -4   4  -1    0.16    0.20
   4   4   1    0.27    0.27
  -5  -4  -1   -0.02    0.24
   5  -4   1    0.49    0.45
   5  -4   1    0.05    0.30
   5  -4   1    0.22    0.15
  -5  -4  -1    0.32    0.17
   5  -4   1    0.49    0.28
  -5  -4  -1   -0.02    0.25
  -5  -4  -1   -0.01    0.25
   5  -4   1   -0.09    0.17
   5   4   1    0.03    0.31
   5   4   1    0.02    0.22
  -5   4  -1    0.17    0.29
   5   4   1    0.11    0.28
  -5   4  -1    0.56    0.41
  -5   4  -1    0.26    0.24
  -5   4  -1    0.02    0.21
   5   4   1   -0.10    0.24
  -6  -4  -1    0.87    0.36
  -6  -4  -1    0.84    0.23
  -6  -4  -1    0.34    0.35
   6  -4   1    1.04    0.36
   6  -4   1    0.74    0.37
   6  -4   1    1.08    0.64
   6  -4   1    0.16    0.35
  -6  -4  -1    0.44    0.41
   6  -4   1    0.12    0.40
  -6   4  -1    1.18    0.39
   6   4   1    0.71    0.38
  -6   4  -1    1.00    0.56
   6   4   1   -0.12    0.41
   6   4   1    0.33    0.48
  -6   4  -1    0.79    0.32
   7  -4   1    2.55    0.90
   7  -4   1    2.09    0.69
  -7  -4  -1    2.61    0.52
  -7  -4  -1    2.16    0.45
   7  -4   1    1.45    0.56
   7  -4   1    1.95    0.38
   7  -4   1    2.05    0.68
  -7  -4  -1    2.86    0.58
   7  -4   1    1.87    0.73
   7   4   1    2.38    0.61
   7   4   1    3.19    0.74
   7   4   1    2.35    0.82
  -7   4  -1    2.35    0.49
   7   4   1    2.55    0.67
  -7   4  -1    2.78    0.56
  -7   4  -1    1.42    0.70
  -7   4  -1    3.49    0.59
   8  -4   1    4.84    1.22
  -8  -4  -1    3.47    0.61
   8  -4   1    3.16    0.78
   8  -4   1    3.61    1.07
   8  -4   1    1.48    0.89
  -8   4  -1    1.82    0.63
   8   4   1    5.31    1.11
   8   4   1    3.40    0.79
  -8   4  -1    2.37    1.00
   8   4   1    4.37    0.94
  -8   4  -1    2.86    0.57
  -8  -5   1   -0.99    0.85
  -8  -5   1   -0.02    0.42
   8  -5  -1    0.71    1.07
   8   5  -1    1.98    0.67
  -8   5   1   -0.39    0.74
  -8   5   1    0.45    0.67
  -8   5   1    0.46    0.43
   7  -5  -1    0.53    0.52
   7  -5  -1    0.11    0.74
   7  -5  -1   -0.15    0.47
  -7  -5   1    0.26    0.64
  -7  -5   1   -0.23    0.52
  -7  -5   1    0.19    0.14
   7  -5  -1    0.81    0.74
   7   5  -1    1.36    0.68
   7   5  -1   -0.46    0.65
  -7   5   1   -0.36    0.58
  -7   5   1    0.19    0.54
  -7   5   1    0.02    0.44
  -7   5   1    0.16    0.37
   7   5  -1    0.30    0.47
   6  -5  -1    0.31    0.34
   6  -5  -1    0.16    0.33
   6  -5  -1    0.17    0.36
  -6  -5   1    0.59    0.53
   6  -5  -1    0.61    0.42
  -6  -5   1    0.88    0.32
   6  -5  -1    0.36    0.29
  -6   5   1    0.38    0.24
   6   5  -1    0.44    0.39
  -6   5   1    0.58    0.37
   6   5  -1    1.10    0.66
  -6   5   1    0.22    0.45
   6   5  -1    0.42    0.26
   5  -5  -1   19.74    1.29
   5  -5  -1   19.87    1.19
  -5  -5   1   18.94    1.26
   5  -5  -1   18.37    1.29
   5  -5  -1   18.07    1.25
  -5  -5   1   19.00    1.24
  -5  -5   1   16.95    1.09
   5  -5  -1   20.81    1.25
  -5   5   1   17.56    1.20
   5   5  -1   19.22    1.34
   5   5  -1   19.80    1.24
   5   5  -1   17.04    1.23
   5   5  -1   20.35    1.22
  -5   5   1   18.42    1.28
  -5   5   1   17.81    1.24
  -5   5   1   19.88    1.22
  -4  -5   1   15.22    1.09
  -4  -5   1   16.63    1.06
   4  -5  -1   16.44    1.14
  -4  -5   1   15.99    1.08
   4  -5  -1   17.32    1.14
   4  -5  -1   18.14    1.10
   4  -5  -1   17.40    1.07
   4   5  -1   16.24    1.09
  -4   5   1   14.58    1.05
  -4   5   1   16.57    1.08
  -4   5   1   16.24    1.08
   4   5  -1   16.47    1.08
  -4   5   1   16.71    1.06
   4   5  -1   17.46    1.05
   4   5  -1   17.32    1.14
  -3  -5   1   16.24    1.04
   3  -5  -1   17.94    1.08
   3  -5  -1   18.49    1.04
   3  -5  -1   16.41    1.06
   3  -5  -1   16.71    1.02
   3  -5  -1   16.89    1.10
  -3  -5   1   16.16    1.01
  -3  -5   1   16.60    1.10
   3   5  -1   17.43    1.02
  -3   5   1   14.92    1.02
  -3   5   1   16.79    1.02
  -3   5   1   16.46    1.11
   3   5  -1   16.14    1.04
   3   5  -1   16.80    1.06
   3   5  -1   16.42    1.04
  -3   5   1   15.84    1.05
  -3   5   1   16.63    1.05
   2  -5  -1    4.09    0.32
  -2  -5   1    3.19    0.27
   2  -5  -1    3.08    0.33
  -2  -5   1    3.50    0.28
   2  -5  -1    3.82    0.34
   2  -5  -1    3.14    0.29
  -2  -5   1    3.35    0.37
   2   5  -1    2.94    0.27
  -2   5   1    3.40    0.32
  -2   5   1    3.24    0.32
   2   5  -1    3.59    0.28
  -2   5   1    3.63    0.38
  -2   5   1    2.77    0.28
   2   5  -1    3.21    0.30
  -2   5   1    3.63    0.33
   2   5  -1    2.97    0.30
   1  -5  -1   17.55    1.03
   1  -5  -1   17.43    1.01
  -1  -5   1   16.74    0.97
   1  -5  -1   14.78    0.99
   1  -5  -1   17.95    1.00
  -1  -5   1   17.58    0.99
   1  -5  -1   15.73    1.01
  -1  -5   1   17.55    1.02
  -1  -5   1   15.68    0.96
  -1   5   1   16.37    1.00
   1   5  -1   18.15    0.97
  -1   5   1   16.55    1.04
  -1   5   1   17.21    1.01
  -1   5   1   16.51    1.01
   1   5  -1   16.44    0.99
   1   5  -1   15.95    0.99
   1   5  -1   16.46    1.01
   0  -5  -1  264.98   14.54
   0  -5  -1  266.44   14.55
   0  -5  -1  230.76   14.52
   0  -5   1  261.98   14.54
   0  -5   1  264.24   14.51
   0  -5  -1  290.15   14.63
   0  -5   1  264.38   14.52
   0   5   1  223.96   14.52
   0   5  -1  257.11   14.54
   0   5   1  268.79   14.64
   0   5  -1  246.27   14.51
   0   5   1  259.81   14.55
   0   5   1  264.29   14.54
   0   5   1  266.69   14.54
   0   5  -1  268.82   14.53
   0   5  -1  257.10   14.52
  -1  -5  -1   61.78    3.59
  -1  -5  -1   64.88    3.61
   1  -5   1   64.47    3.60
   1  -5   1   66.31    3.60
   1  -5   1   61.78    3.54
  -1  -5  -1   62.04    3.58
   1  -5   1   64.87    3.58
  -1  -5  -1   65.35    3.61
  -1  -5  -1   63.00    3.60
   1  -5   1   64.49    3.60
  -1   5  -1   65.69    3.58
   1   5   1   59.52    3.59
  -1   5  -1   63.96    3.60
   1   5   1   64.86    3.61
   1   5   1   62.38    3.60
  -1   5  -1   64.96    3.60
  -1   5  -1   63.82    3.60
   1   5   1   56.90    3.58
   1   5   1   63.21    3.60
   2  -5   1    9.32    0.53
   2  -5   1    9.19    0.59
  -2  -5  -1    9.25    0.60
   2  -5   1    8.92    0.60
  -2  -5  -1    9.56    0.58
  -2  -5  -1    8.86    0.61
  -2  -5  -1    7.98    0.55
   2  -5   1    8.72    0.60
  -2  -5  -1    8.65    0.60
   2  -5   1    8.96    0.57
   2   5   1    8.65    0.59
  -2   5  -1    8.57    0.54
   2   5   1    8.21    0.59
  -2   5  -1    9.13    0.56
  -2   5  -1    8.64    0.60
  -2   5  -1    8.33    0.58
   2   5   1    8.63    0.57
   2   5   1    9.36    0.60
  -3  -5  -1    2.68    0.32
   3  -5   1    2.00    0.34
   3  -5   1    2.90    0.36
  -3  -5  -1    2.63    0.27
  -3  -5  -1    2.14    0.26
   3  -5   1    2.72    0.30
  -3  -5  -1    2.02    0.30
   3  -5   1    2.64    0.29
  -3  -5  -1    2.04    0.23
  -3  -5  -1    2.35    0.23
   3  -5   1    2.74    0.24
  -3   5  -1    2.33    0.25
   3   5   1    2.10    0.25
  -3   5  -1    2.77    0.23
  -3   5  -1    3.03    0.31
  -3   5  -1    2.81    0.34
   3   5   1    2.60    0.38
   3   5   1    2.53    0.34
   3   5   1    2.26    0.32
  -3   5  -1    2.25    0.32
   4  -5   1    1.50    0.32
   4  -5   1    1.25    0.21
  -4  -5  -1    1.47    0.36
  -4  -5  -1    1.14    0.23
   4  -5   1    1.68    0.29
  -4  -5  -1    1.56    0.29
   4  -5   1    1.45    0.27
   4  -5   1    1.19    0.34
  -4  -5  -1    1.29    0.28
   4   5   1    1.42    0.32
   4   5   1    1.17    0.22
  -4   5  -1    1.10    0.34
  -4   5  -1    1.41    0.28
  -4   5  -1    1.13    0.22
   4   5   1    1.39    0.26
  -4   5  -1    1.34    0.30
  -4   5  -1    1.17    0.24
   4   5   1    1.06    0.25
   5  -5   1    1.58    0.41
  -5  -5  -1    0.63    0.44
   5  -5   1    1.13    0.33
  -5  -5  -1    1.28    0.30
   5  -5   1    1.27    0.29
   5  -5   1    1.00    0.40
   5  -5   1    1.32    0.26
  -5  -5  -1    1.22    0.24
  -5   5  -1    1.29    0.44
  -5   5  -1    0.75    0.36
   5   5   1    0.89    0.31
   5   5   1    0.86    0.31
   5   5   1    1.03    0.45
  -5   5  -1    1.77    0.35
  -5   5  -1    1.43    0.32
  -6  -5  -1    0.49    0.60
   6  -5   1    0.82    0.52
  -6  -5  -1    1.25    0.46
  -6  -5  -1    0.81    0.22
   6  -5   1    0.75    0.25
   6  -5   1    0.22    0.43
   6  -5   1    0.93    0.32
   6  -5   1    0.52    0.39
   6   5   1    0.92    0.36
  -6   5  -1    0.74    0.36
   6   5   1    1.17    0.61
   6   5   1    0.56    0.43
   6   5   1    0.38    0.35
  -6   5  -1    1.16    0.43
  -6   5  -1    1.55    0.57
   7  -5   1    1.87    0.60
  -7  -5  -1    4.02    1.43
   7  -5   1    1.83    0.57
  -7  -5  -1    3.00    0.64
   7  -5   1    2.57    0.61
   7  -5   1    3.57    0.64
  -7  -5  -1    2.62    0.44
   7  -5   1    3.36    0.69
   7   5   1    1.58    0.70
  -7   5  -1    3.37    0.81
  -7   5  -1    4.16    0.71
   7   5   1    2.07    0.57
  -7   5  -1    3.10    0.60
  -8  -5  -1    1.48    0.76
  -8  -5  -1    0.42    0.40
   8  -5   1    0.83    0.74
  -8  -5  -1   -0.52    1.01
   8  -5   1   -0.14    0.69
   8  -5   1    2.44    1.08
   8   5   1    0.36    0.92
  -8   5  -1   -0.78    0.49
  -8   5  -1    0.44    0.55
  -8   5  -1   -0.34    0.54
   8   5   1    0.58    0.89
  -8  -6   1    0.62    0.58
   8  -6  -1   -0.99    1.05
  -8   6   1   -0.60    0.60
  -8   6   1    0.65    0.45
  -8   6   1    0.29    0.56
   8   6  -1    0.99    1.25
  -7  -6   1    1.06    0.53
   7  -6  -1    3.02    0.55
   7  -6  -1    2.00    0.77
   7  -6  -1    3.39    0.65
  -7  -6   1    2.43    0.55
   7  -6  -1    2.09    0.55
  -7   6   1    2.97    0.69
  -7   6   1    2.77    0.62
   7   6  -1    2.12    0.89
  -7   6   1    2.27    0.59
  -7   6   1    2.36    0.55
   7   6  -1    1.59    0.91
   7   6  -1    2.50    0.55
   6  -6  -1    3.35    0.61
   6  -6  -1    2.36    0.47
  -6  -6   1    1.63    0.45
  -6  -6   1    3.06    0.50
   6  -6  -1    1.80    0.40
   6  -6  -1    2.90    0.65
   6  -6  -1    2.86    0.76
  -6   6   1    2.86    0.46
   6   6  -1    2.77    0.63
  -6   6   1    2.93    0.61
   6   6  -1    3.34    0.66
   6   6  -1    2.34    0.66
  -6   6   1    2.84    0.56
  -5  -6   1   18.46    1.29
   5  -6  -1   18.08    1.28
  -5  -6   1   18.85    1.23
   5  -6  -1   19.82    1.23
   5  -6  -1   20.44    1.33
   5  -6  -1   20.66    1.20
   5  -6  -1   19.10    1.17
  -5  -6   1   17.07    1.22
   5   6  -1   19.87    1.20
   5   6  -1   17.79    1.29
  -5   6   1   17.35    1.36
   5   6  -1   18.40    1.32
   5   6  -1   18.20    1.29
  -5   6   1   18.83    1.19
  -5   6   1   17.25    1.24
  -5   6   1   18.51    1.23
  -5   6   1   15.73    1.18
  -4  -6   1    1.19    0.27
   4  -6  -1    1.42    0.34
   4  -6  -1    1.47    0.29
  -4  -6   1    1.28    0.45
   4  -6  -1    1.07    0.40
   4  -6  -1    1.37    0.26
  -4  -6   1    0.83    0.24
  -4  -6   1    1.74    0.34
   4  -6  -1    1.52    0.39
   4   6  -1    1.24    0.30
   4   6  -1    1.24    0.41
  -4   6   1    1.31    0.32
   4   6  -1    1.20    0.25
   4   6  -1    1.34    0.29
  -4   6   1    1.49    0.43
  -4   6   1    1.31    0.34
  -4   6   1    1.35    0.25
   3  -6  -1    1.53    0.29
   3  -6  -1    1.66    0.31
  -3  -6   1    1.12    0.21
  -3  -6   1    1.45    0.25
   3  -6  -1    1.46    0.31
   3  -6  -1    1.63    0.28
  -3  -6   1    1.80    0.38
   3  -6  -1    1.59    0.27
   3   6  -1    1.57    0.28
  -3   6   1    0.94    0.25
  -3   6   1    1.87    0.25
  -3   6   1    1.60    0.32
   3   6  -1    1.67    0.22
  -3   6   1    1.34    0.23
   3   6  -1    1.43    0.27
   3   6  -1    1.57    0.27
  -3   6   1    1.48    0.26
   2  -6  -1    3.54    0.36
   2  -6  -1    4.10    0.41
   2  -6  -1    3.29    0.37
   2  -6  -1    3.59    0.29
   2  -6  -1    3.15    0.31
  -2  -6   1    3.55    0.30
  -2  -6   1    3.81    0.34
  -2  -6   1    3.11    0.26
   2   6  -1    2.69    0.32
   2   6  -1    3.72    0.28
  -2   6   1    3.60    0.42
  -2   6   1    3.31    0.35
   2   6  -1    3.64    0.33
  -2   6   1    3.01    0.34
  -2   6   1    3.61    0.35
  -1  -6   1   28.16    1.58
   1  -6  -1   24.02    1.60
   1  -6  -1   29.19    1.62
  -1  -6   1   29.51    1.66
   1  -6  -1   28.92    1.65
   1  -6  -1   28.92    1.63
  -1  -6   1   27.01    1.57
   1  -6  -1   27.47    1.63
  -1  -6   1   28.24    1.62
   1   6  -1   28.88    1.58
  -1   6   1   26.73    1.63
  -1   6   1   27.49    1.65
  -1   6   1   26.65    1.61
   1   6  -1   27.33    1.61
   1   6  -1   27.41    1.64
  -1   6   1   28.33    1.63
   1   6  -1   27.33    1.61
   1   6  -1   28.00    1.58
   0  -6   1   17.76    1.04
   0  -6  -1   18.32    1.09
   0  -6   1   18.05    1.06
   0  -6  -1   18.88    1.07
   0  -6  -1   18.08    1.08
   0  -6  -1   16.51    1.05
   0  -6   1   18.51    1.09
   0  -6  -1   18.84    1.09
   0   6  -1   17.83    1.07
   0   6   1   15.30    1.05
   0   6   1   17.41    1.08
   0   6  -1   17.11    1.06
   0   6   1   16.99    1.07
   0   6   1   17.27    1.06
   0   6   1   18.60    1.11
   0   6  -1   19.49    1.04
   0   6  -1   18.05    1.08
   1  -6   1    9.94    0.65
  -1  -6  -1   10.20    0.68
  -1  -6  -1   10.51    0.65
  -1  -6  -1   10.55    0.68
   1  -6   1   10.70    0.65
   1  -6   1   10.62    0.67
   1  -6   1   10.60    0.66
  -1  -6  -1    9.94    0.67
   1  -6   1   10.49    0.58
  -1  -6  -1   10.36    0.65
  -1   6  -1   10.47    0.67
   1   6   1    9.38    0.64
  -1   6  -1   10.82    0.67
  -1   6  -1   10.74    0.68
   1   6   1    9.03    0.64
   1   6   1   10.26    0.67
   1   6   1   10.13    0.68
   1   6   1    9.97    0.67
  -1   6  -1   11.08    0.65
   2  -6   1   48.26    2.70
  -2  -6  -1   51.68    2.69
  -2  -6  -1   46.39    2.71
  -2  -6  -1   47.91    2.71
   2  -6   1   48.41    2.71
  -2  -6  -1   46.26    2.70
   2  -6   1   48.49    2.68
   2  -6   1   46.83    2.71
  -2  -6  -1   44.02    2.66
   2  -6   1   47.35    2.64
  -2   6  -1   42.26    2.64
   2   6   1   45.39    2.71
  -2   6  -1   46.46    2.71
   2   6   1   45.81    2.69
  -2   6  -1   46.19    2.70
   2   6   1   44.13    2.69
  -2   6  -1   48.08    2.71
  -2   6  -1   48.45    2.68
  -3  -6  -1    5.11    0.47
  -3  -6  -1    5.17    0.40
   3  -6   1    5.94    0.53
   3  -6   1    5.41    0.45
  -3  -6  -1    4.72    0.40
  -3  -6  -1    6.17    0.52
   3  -6   1    6.61    0.45
   3  -6   1    5.99    0.39
  -3  -6  -1    5.41    0.47
  -3  -6  -1    5.96    0.45
   3  -6   1    6.13    0.47
   3   6   1    6.16    0.54
  -3   6  -1    5.65    0.48
   3   6   1    6.86    0.52
   3   6   1    4.76    0.47
  -3   6  -1    6.35    0.50
  -3   6  -1    5.98    0.43
  -3   6  -1    5.24    0.39
   3   6   1    5.10    0.49
  -3   6  -1    5.90    0.49
  -4  -6  -1    0.06    0.12
   4  -6   1    0.11    0.19
  -4  -6  -1    0.16    0.10
  -4  -6  -1   -0.19    0.29
  -4  -6  -1    0.00    0.13
   4  -6   1   -0.13    0.16
   4  -6   1   -0.12    0.14
   4  -6   1    0.36    0.21
  -4  -6  -1   -0.01    0.23
  -4  -6  -1   -0.02    0.22
  -4   6  -1   -0.15    0.15
   4   6   1   -0.36    0.23
   4   6   1   -0.14    0.30
  -4   6  -1    0.02    0.23
   4   6   1    0.01    0.31
  -4   6  -1   -0.09    0.24
  -4   6  -1    0.15    0.26
  -4   6  -1    0.00    0.23
   5  -6   1   -0.04    0.36
  -5  -6  -1    0.00    0.19
  -5  -6  -1    0.14    0.15
   5  -6   1    0.09    0.31
   5  -6   1   -0.30    0.43
  -5  -6  -1   -0.02    0.45
   5  -6   1    0.08    0.19
  -5  -6  -1   -0.37    0.34
  -5  -6  -1   -0.45    0.39
  -5  -6  -1    0.21    0.18
   5  -6   1    0.10    0.40
  -5   6  -1    0.10    0.37
  -5   6  -1   -0.26    0.19
   5   6   1   -0.17    0.33
   5   6   1    0.57    0.35
   5   6   1   -0.23    0.44
  -5   6  -1    0.51    0.34
  -5   6  -1    0.06    0.21
  -5   6  -1    0.14    0.42
  -6  -6  -1   10.22    0.64
   6  -6   1   10.10    1.10
   6  -6   1    9.26    0.86
  -6  -6  -1   10.96    0.90
  -6  -6  -1    8.85    0.67
  -6  -6  -1    9.69    0.85
   6  -6   1    8.93    0.72
   6  -6   1    9.89    1.06
   6  -6   1    8.90    0.85
   6   6   1    7.85    0.72
   6   6   1    8.18    0.76
  -6   6  -1    8.38    1.14
   6   6   1    9.03    1.06
   6   6   1    9.74    0.86
  -6   6  -1   10.53    0.86
  -6   6  -1   10.44    0.95
  -6   6  -1    8.40    0.72
   7  -6   1    8.12    1.16
   7  -6   1    8.47    1.33
   7  -6   1    4.80    0.90
  -7  -6  -1    7.37    0.92
   7  -6   1    5.31    1.02
  -7  -6  -1    5.56    0.89
   7  -6   1    6.31    0.87
  -7  -6  -1    5.74    0.55
   7   6   1    7.56    1.26
  -7   6  -1    7.44    1.23
   7   6   1    6.13    0.83
  -7   6  -1    6.23    0.79
  -7   6  -1    8.21    0.88
  -7   6  -1    7.36    1.08
   7   6   1    7.66    0.98
  -8  -6  -1    1.70    0.77
   8  -6   1    0.61    0.94
   8  -6   1   -0.46    1.29
  -8  -6  -1    0.06    0.63
   8  -6   1    0.27    0.87
  -8   6  -1   -0.22    0.66
  -8   6  -1   -0.54    0.53
   8   6   1    1.35    0.99
  -8  -7   1    0.04    0.61
  -8  -7   1   -0.16    0.94
   8  -7  -1    0.19    0.65
  -8   7   1    0.04    0.56
  -8   7   1   -1.50    0.88
  -8   7   1    0.64    0.51
   7  -7  -1    2.81    0.91
  -7  -7   1    2.85    0.51
   7  -7  -1    3.90    0.96
  -7  -7   1    3.09    0.83
   7  -7  -1    2.87    0.87
  -7   7   1    3.44    0.74
  -7   7   1    2.47    0.48
   7   7  -1    1.50    0.82
  -7   7   1    2.51    0.71
  -7   7   1    3.14    0.60
   6  -7  -1   -0.08    0.33
  -6  -7   1   -0.46    0.40
   6  -7  -1   -0.39    0.25
  -6  -7   1    0.23    0.35
  -6  -7   1   -0.14    0.46
   6  -7  -1    0.37    0.58
   6   7  -1   -0.22    0.46
  -6   7   1    0.59    0.36
  -6   7   1   -0.36    0.34
   6   7  -1   -0.08    0.35
  -6   7   1   -0.38    0.50
   6   7  -1   -0.58    0.44
   5  -7  -1    0.49    0.48
  -5  -7   1    0.70    0.34
   5  -7  -1    0.53    0.23
   5  -7  -1    0.61    0.28
   5  -7  -1    0.61    0.53
  -5  -7   1    0.66    0.39
   5  -7  -1    0.57    0.26
  -5  -7   1    0.30    0.33
   5   7  -1    0.23    0.28
  -5   7   1    0.81    0.25
  -5   7   1    1.02    0.38
   5   7  -1    0.24    0.34
   5   7  -1    0.88    0.37
   5   7  -1    0.29    0.32
  -5   7   1    0.37    0.33
  -5   7   1    0.47    0.32
  -5   7   1    0.82    0.54
   4  -7  -1    2.50    0.38
  -4  -7   1    2.61    0.34
  -4  -7   1    3.05    0.58
   4  -7  -1    2.59    0.50
   4  -7  -1    1.99    0.31
   4  -7  -1    2.21    0.42
  -4  -7   1    2.35    0.37
  -4  -7   1    1.64    0.34
   4  -7  -1    2.25    0.45
   4   7  -1    2.53    0.51
  -4   7   1    1.96    0.31
  -4   7   1    1.88    0.40
   4   7  -1    2.66    0.35
  -4   7   1    2.67    0.34
  -4   7   1    2.83    0.49
   4   7  -1    2.32    0.38
   3  -7  -1    0.17    0.24
  -3  -7   1   -0.12    0.19
   3  -7  -1    0.36    0.24
   3  -7  -1    0.09    0.18
   3  -7  -1    0.10    0.15
  -3  -7   1    0.02    0.16
  -3  -7   1    0.01    0.16
   3  -7  -1    0.05    0.25
  -3   7   1    0.07    0.31
  -3   7   1    0.26    0.12
   3   7  -1    0.23    0.23
  -3   7   1    0.26    0.24
   3   7  -1    0.46    0.18
   3   7  -1   -0.10    0.17
  -3   7   1    0.15    0.17
   3   7  -1   -0.02    0.18
  -3   7   1   -0.04    0.23
  -2  -7   1   -0.14    0.08
  -2  -7   1   -0.21    0.21
  -2  -7   1    0.00    0.05
   2  -7  -1   -0.13    0.12
  -2  -7   1   -0.20    0.16
   2  -7  -1   -0.30    0.18
   2  -7  -1   -0.25    0.19
   2  -7  -1    0.33    0.18
   2   7  -1   -0.06    0.10
  -2   7   1    0.01    0.17
  -2   7   1   -0.32    0.19
   2   7  -1    0.14    0.26
   2   7  -1   -0.03    0.04
   2   7  -1   -0.14    0.18
   2   7  -1   -0.04    0.15
  -2   7   1   -0.20    0.13
  -1  -7   1   36.88    2.17
  -1  -7   1   37.32    2.14
   1  -7  -1   39.67    2.15
   1  -7  -1   37.43    2.16
   1  -7  -1   38.24    2.16
  -1  -7   1   36.99    2.10
   1  -7  -1   32.58    2.13
  -1  -7   1   38.01    2.10
   1  -7  -1   37.85    2.19
   1   7  -1   36.14    2.17
  -1   7   1   38.32    2.17
  -1   7   1   35.86    2.15
   1   7  -1   36.76    2.14
   1   7  -1   37.81    2.10
  -1   7   1   36.63    2.19
   1   7  -1   36.30    2.15
   1   7  -1   37.51    2.10
  -1   7   1   36.82    2.16
   0  -7   1    1.65    0.18
   0  -7   1    1.53    0.11
   0  -7  -1    1.13    0.16
   0  -7   1    1.69    0.21
   0  -7  -1    1.30    0.18
   0  -7  -1    1.81    0.24
   0  -7   1    1.53    0.26
   0  -7  -1    1.56    0.27
   0  -7   1    1.43    0.20
   0  -7  -1    1.84    0.30
   0   7   1    1.47    0.17
   0   7  -1    1.60    0.22
   0   7  -1    1.40    0.24
   0   7  -1    2.08    0.28
   0   7  -1    1.72    0.20
   0   7   1    1.23    0.18
   0   7   1    1.85    0.32
   0   7   1    1.50    0.22
   0   7   1    1.41    0.26
  -1  -7  -1   49.07    2.79
   1  -7   1   50.00    2.79
  -1  -7  -1   49.43    2.82
   1  -7   1   46.47    2.73
   1  -7   1   49.44    2.81
   1  -7   1   49.86    2.81
   1  -7   1   49.89    2.81
  -1  -7  -1   49.79    2.82
  -1  -7  -1   48.53    2.82
  -1  -7  -1   49.92    2.78
  -1   7  -1   48.78    2.81
  -1   7  -1   48.72    2.81
   1   7   1   48.31    2.82
   1   7   1   49.12    2.81
   1   7   1   49.27    2.82
  -1   7  -1   51.82    2.79
  -1   7  -1   49.97    2.82
   1   7   1   43.22    2.78
   1   7   1   45.51    2.78
  -2  -7  -1    2.63    0.28
  -2  -7  -1    2.55    0.35
   2  -7   1    2.73    0.30
   2  -7   1    2.47    0.31
   2  -7   1    2.88    0.34
  -2  -7  -1    2.09    0.29
   2  -7   1    2.72    0.20
  -2  -7  -1    2.65    0.26
  -2  -7  -1    2.90    0.35
   2  -7   1    3.52    0.38
  -2   7  -1    2.43    0.32
   2   7   1    2.94    0.25
  -2   7  -1    2.61    0.24
   2   7   1    3.11    0.38
  -2   7  -1    3.04    0.31
  -2   7  -1    2.72    0.36
   2   7   1    2.33    0.35
   2   7   1    1.88    0.27
  -3  -7  -1   -0.28    0.16
   3  -7   1    0.07    0.10
   3  -7   1    0.08    0.17
   3  -7   1   -0.27    0.21
  -3  -7  -1    0.18    0.09
   3  -7   1   -0.12    0.10
  -3  -7  -1    0.01    0.10
  -3  -7  -1   -0.19    0.27
  -3  -7  -1   -0.25    0.16
  -3  -7  -1   -0.46    0.25
   3   7   1    0.08    0.21
  -3   7  -1    0.07    0.12
  -3   7  -1    0.06    0.25
  -3   7  -1    0.24    0.22
  -3   7  -1    0.02    0.19
   3   7   1    0.00    0.23
  -3   7  -1    0.16    0.28
   3   7   1   -0.09    0.18
   3   7   1   -0.02    0.19
  -4  -7  -1    0.01    0.34
  -4  -7  -1    0.04    0.27
   4  -7   1   -0.05    0.23
   4  -7   1   -0.23    0.19
  -4  -7  -1    0.00    0.13
   4  -7   1   -0.31    0.35
   4  -7   1    0.37    0.29
   4  -7   1   -0.07    0.17
  -4  -7  -1   -0.05    0.14
  -4   7  -1    0.18    0.33
  -4   7  -1    0.19    0.29
  -4   7  -1   -0.24    0.19
   4   7   1   -0.04    0.31
   4   7   1   -0.26    0.27
  -4   7  -1   -0.05    0.23
  -4   7  -1   -0.10    0.14
   4   7   1    0.25    0.38
   5  -7   1    4.38    0.40
   5  -7   1    4.68    0.58
  -5  -7  -1    4.01    0.63
   5  -7   1    4.02    0.49
  -5  -7  -1    5.00    0.35
  -5  -7  -1    4.04    0.57
  -5  -7  -1    4.94    0.54
   5  -7   1    3.17    0.48
  -5  -7  -1    4.31    0.40
  -5  -7  -1    4.58    0.49
  -5   7  -1    4.34    0.55
   5   7   1    3.26    0.57
  -5   7  -1    3.73    1.03
   5   7   1    3.94    0.45
   5   7   1    3.82    0.59
   5   7   1    5.18    0.68
  -5   7  -1    3.09    0.54
  -5   7  -1    4.98    0.69
  -5   7  -1    3.40    0.48
   6  -7   1    1.44    0.49
   6  -7   1    2.05    0.36
   6  -7   1    2.00    0.51
  -6  -7  -1    1.72    0.69
   6  -7   1    2.97    0.64
  -6  -7  -1    2.49    0.30
  -6  -7  -1    2.57    0.46
  -6  -7  -1    2.45    0.41
  -6   7  -1    2.48    0.52
   6   7   1    3.27    0.64
   6   7   1    2.01    0.68
  -6   7  -1    2.06    0.63
  -6   7  -1    2.68    0.49
   6   7   1    2.49    0.75
   6   7   1    2.90    0.57
  -6   7  -1    2.71    0.55
  -7  -7  -1    1.24    0.27
   7  -7   1    0.65    0.59
   7  -7   1    2.44    0.86
  -7  -7  -1    0.85    0.55
   7  -7   1    0.54    0.55
  -7  -7  -1    1.51    0.50
  -7  -7  -1    2.28    0.85
   7  -7   1    2.55    0.68
  -7   7  -1    2.56    0.51
   7   7   1    2.53    0.66
  -7   7  -1    2.30    0.44
   7   7   1    0.44    0.92
   7   7   1    3.12    0.80
  -7   7  -1    0.40    0.71
  -7   7  -1    1.44    0.41
   8  -7   1    1.16    0.68
   8  -7   1    2.82    1.21
  -8  -7  -1    1.16    0.67
  -8  -7  -1    1.70    0.96
  -8   7  -1   -0.26    0.70
  -8   7  -1    1.18    1.02
  -8   7  -1    1.33    0.71
   8  -8  -1   -1.19    1.14
  -8   8   1   -0.60    0.55
  -8   8   1    0.81    0.59
  -8   8   1    0.06    0.55
   7  -8  -1   -0.08    0.98
  -7  -8   1    0.58    0.37
  -7  -8   1    0.92    0.63
  -7  -8   1    0.46    0.48
  -7   8   1    0.57    0.53
  -7   8   1    0.76    0.40
  -7   8   1    1.87    0.65
  -7   8   1    0.02    0.52
   7   8  -1    1.17    0.60
   6  -8  -1   -0.92    0.67
   6  -8  -1   -0.39    0.72
  -6  -8   1   -0.21    0.42
   6  -8  -1   -0.17    0.35
   6  -8  -1    0.17    0.27
  -6  -8   1    0.34    0.52
  -6  -8   1    0.71    0.33
   6  -8  -1   -0.41    0.31
  -6   8   1   -0.73    0.54
  -6   8   1   -0.32    0.40
  -6   8   1    0.49    0.42
   6   8  -1   -0.49    0.62
   6   8  -1   -0.09    0.33
   6   8  -1    0.59    0.66
  -6   8   1   -0.07    0.44
  -6   8   1    1.14    0.78
  -5  -8   1    1.20    0.64
   5  -8  -1    1.97    0.37
   5  -8  -1    1.54    0.48
  -5  -8   1    1.50    0.47
  -5  -8   1    2.21    0.41
   5  -8  -1    1.68    0.35
   5  -8  -1    2.50    0.66
   5  -8  -1    1.40    0.48
  -5   8   1    1.20    0.29
  -5   8   1    1.63    0.57
   5   8  -1    1.00    0.51
  -5   8   1    1.58    0.40
   5   8  -1    0.75    0.31
   5   8  -1    1.18    0.45
  -5   8   1    1.86    0.49
  -5   8   1    1.44    0.32
   5   8  -1    1.18    0.36
  -4  -8   1    0.71    0.34
   4  -8  -1    1.11    0.36
  -4  -8   1    0.85    0.43
   4  -8  -1    0.78    0.32
   4  -8  -1    1.00    0.31
  -4  -8   1    0.41    0.36
   4  -8  -1    0.54    0.22
  -4  -8   1    0.53    0.21
   4  -8  -1    1.11    0.47
  -4   8   1    1.07    0.24
   4   8  -1    0.28    0.22
   4   8  -1    0.65    0.24
  -4   8   1    0.93    0.39
  -4   8   1    1.16    0.31
  -4   8   1    1.88    0.57
  -4   8   1    0.86    0.21
   4   8  -1    0.56    0.37
  -3  -8   1    0.07    0.15
   3  -8  -1    0.37    0.28
   3  -8  -1   -0.04    0.13
   3  -8  -1    0.16    0.28
   3  -8  -1    0.11    0.16
  -3  -8   1   -0.03    0.36
  -3  -8   1   -0.25    0.18
  -3  -8   1    0.32    0.27
   3  -8  -1    0.39    0.27
   3   8  -1   -0.03    0.21
   3   8  -1   -0.04    0.24
  -3   8   1    0.10    0.20
  -3   8   1   -0.06    0.21
  -3   8   1    0.32    0.27
   3   8  -1    0.19    0.25
  -3   8   1    0.11    0.39
   3   8  -1    0.16    0.14
   2  -8  -1    3.25    0.40
  -2  -8   1    3.71    0.38
  -2  -8   1    3.98    0.46
  -2  -8   1    3.52    0.24
   2  -8  -1    4.21    0.47
   2  -8  -1    4.39    0.38
   2  -8  -1    3.41    0.40
   2  -8  -1    3.26    0.31
  -2  -8   1    3.78    0.30
   2   8  -1    3.70    0.37
  -2   8   1    3.34    0.43
  -2   8   1    3.63    0.51
   2   8  -1    3.31    0.33
  -2   8   1    3.22    0.36
   2   8  -1    3.86    0.29
   2   8  -1    3.52    0.38
  -2   8   1    3.93    0.35
   1  -8  -1   15.95    1.06
   1  -8  -1   18.69    1.08
  -1  -8   1   17.91    1.08
   1  -8  -1   18.31    1.13
   1  -8  -1   18.22    1.10
  -1  -8   1   17.23    1.03
  -1  -8   1   18.26    1.11
   1  -8  -1   18.42    1.11
  -1  -8   1   17.65    1.13
  -1  -8   1   18.66    1.03
  -1   8   1   18.06    1.11
   1   8  -1   17.45    1.09
  -1   8   1   16.68    1.08
   1   8  -1   17.21    1.03
   1   8  -1   17.58    1.09
  -1   8   1   16.97    1.15
   1   8  -1   17.72    1.03
   1   8  -1   18.08    1.13
  -1   8   1   16.91    1.10
   0  -8  -1    0.93    0.17
   0  -8  -1    1.15    0.22
   0  -8   1    1.21    0.26
   0  -8  -1    1.05    0.24
   0  -8  -1    1.28    0.23
   0  -8  -1    1.11    0.19
   0  -8   1    1.30    0.22
   0  -8   1    1.41    0.24
   0  -8   1    1.21    0.09
   0  -8   1    1.12    0.16
   0   8   1    1.03    0.20
   0   8   1    1.00    0.18
   0   8  -1    1.23    0.23
   0   8  -1    1.37    0.28
   0   8   1    1.43    0.25
   0   8  -1    1.00    0.21
   0   8  -1    1.09    0.20
   0   8   1    1.54    0.33
   0   8   1    1.22    0.24
   1  -8   1    5.94    0.39
  -1  -8  -1    7.37    0.50
  -1  -8  -1    6.87    0.56
   1  -8   1    6.48    0.48
   1  -8   1    6.84    0.51
  -1  -8  -1    6.97    0.49
   1  -8   1    7.07    0.53
  -1  -8  -1    7.09    0.55
  -1  -8  -1    6.61    0.50
   1  -8   1    7.01    0.50
   1  -8   1    6.73    0.39
  -1   8  -1    7.55    0.57
  -1   8  -1    7.30    0.48
   1   8   1    6.99    0.52
   1   8   1    7.32    0.54
   1   8   1    6.62    0.50
  -1   8  -1    6.87    0.51
  -1   8  -1    6.80    0.51
   1   8   1    6.88    0.55
   1   8   1    6.33    0.49
  -2  -8  -1    1.06    0.20
  -2  -8  -1    0.77    0.24
  -2  -8  -1    1.20    0.28
   2  -8   1    1.06    0.21
  -2  -8  -1    0.98    0.17
   2  -8   1    1.19    0.26
  -2  -8  -1    1.29    0.28
   2  -8   1    1.37    0.27
   2  -8   1    1.00    0.23
   2   8   1    1.20    0.26
   2   8   1    1.19    0.24
  -2   8  -1    1.14    0.25
  -2   8  -1    1.34    0.24
  -2   8  -1    1.02    0.26
   2   8   1    1.01    0.24
  -2   8  -1    1.15    0.22
   2   8   1    0.66    0.18
   2   8   1    0.83    0.17
   3  -8   1   -0.05    0.27
   3  -8   1   -0.13    0.12
  -3  -8  -1   -0.21    0.17
   3  -8   1   -0.04    0.11
  -3  -8  -1   -0.09    0.12
   3  -8   1   -0.17    0.14
  -3  -8  -1   -0.18    0.21
  -3  -8  -1    0.05    0.17
  -3   8  -1   -0.17    0.27
  -3   8  -1    0.09    0.15
  -3   8  -1    0.02    0.27
   3   8   1    0.17    0.27
  -3   8  -1   -0.04    0.15
   3   8   1    0.07    0.26
  -4  -8  -1    1.52    0.29
   4  -8   1    1.74    0.40
  -4  -8  -1    2.07    0.40
   4  -8   1    1.36    0.28
   4  -8   1    1.90    0.36
   4  -8   1    1.61    0.28
  -4  -8  -1    1.57    0.25
   4  -8   1    1.88    0.34
  -4  -8  -1    1.71    0.29
  -4  -8  -1    1.74    0.49
  -4  -8  -1    1.13    0.20
  -4   8  -1    1.27    0.33
   4   8   1    1.95    0.42
  -4   8  -1    1.68    0.49
  -4   8  -1    1.39    0.27
   4   8   1    1.62    0.38
  -4   8  -1    1.63    0.35
   4   8   1    1.33    0.34
   4   8   1    2.15    0.38
  -4   8  -1    1.47    0.32
   5  -8   1    3.27    0.60
  -5  -8  -1    3.67    0.47
   5  -8   1    3.47    0.40
   5  -8   1    3.10    0.60
  -5  -8  -1    3.57    0.31
  -5  -8  -1    3.20    0.70
   5  -8   1    3.86    0.76
  -5  -8  -1    3.02    0.64
  -5  -8  -1    3.59    0.53
  -5  -8  -1    3.14    0.34
  -5   8  -1    2.93    0.46
   5   8   1    3.16    0.57
  -5   8  -1    3.62    0.76
   5   8   1    3.19    0.56
  -5   8  -1    3.48    0.60
   5   8   1    2.94    0.56
  -5   8  -1    2.89    0.56
   5   8   1    2.83    0.59
  -5   8  -1    2.90    0.59
  -6  -8  -1    5.14    0.48
  -6  -8  -1    5.59    0.86
  -6  -8  -1    6.53    0.73
   6  -8   1    6.23    1.13
   6  -8   1    5.60    0.62
   6  -8   1    6.16    0.83
  -6  -8  -1    6.09    0.68
   6  -8   1    4.84    0.71
   6  -8   1    6.30    0.68
  -6  -8  -1    5.90    0.43
  -6   8  -1    6.35    0.78
  -6   8  -1    6.29    0.68
   6   8   1    5.93    0.90
  -6   8  -1    4.87    0.69
   6   8   1    6.42    0.81
   6   8   1    6.07    0.84
  -7  -8  -1    2.24    0.85
  -7  -8  -1    0.31    0.87
   7  -8   1    1.52    0.51
   7  -8   1    0.47    1.04
  -7  -8  -1    1.34    0.39
  -7  -8  -1    0.66    0.20
  -7  -8  -1    0.35    0.52
   7  -8   1    0.81    0.73
   7  -8   1   -0.56    0.57
  -7   8  -1    2.45    0.99
  -7   8  -1    1.08    0.56
   7   8   1    1.01    0.70
  -7   8  -1    0.88    0.54
   7   8   1   -0.79    0.76
   7   8   1    1.03    0.80
  -7   8  -1    0.04    0.46
   8  -8   1    0.07    1.03
  -8  -8  -1   -1.09    1.28
  -8  -8  -1    0.52    0.62
   8  -8   1   -1.33    0.97
  -8   8  -1    1.31    0.56
  -8   8  -1    0.56    0.52
  -8   8  -1   -0.72    0.58
   8  -9  -1   -2.02    1.22
  -8  -9   1   -0.86    0.83
  -8  -9   1    2.17    0.90
  -8   9   1    0.67    0.66
  -8   9   1    3.29    1.08
   7  -9  -1   -0.05    0.80
   7  -9  -1    0.14    0.83
  -7  -9   1    0.29    0.41
   7  -9  -1   -1.57    1.05
  -7  -9   1    1.24    0.83
   7   9  -1    1.66    0.96
  -7   9   1    0.33    0.39
  -7   9   1    0.99    0.51
  -6  -9   1    0.15    0.48
   6  -9  -1    0.89    0.68
  -6  -9   1    0.12    0.56
   6  -9  -1   -0.16    0.39
   6  -9  -1   -0.28    0.41
   6  -9  -1    0.69    0.68
  -6  -9   1    1.25    0.37
   6  -9  -1   -0.12    0.32
  -6   9   1    0.55    0.83
  -6   9   1    0.22    0.54
   6   9  -1    1.16    0.53
   6   9  -1    0.39    0.34
  -6   9   1    0.38    0.48
  -6   9   1    1.10    0.54
  -5  -9   1    5.43    0.72
  -5  -9   1    6.44    0.66
   5  -9  -1    6.70    0.66
  -5  -9   1    4.76    0.73
   5  -9  -1    6.02    0.77
   5  -9  -1    7.63    0.77
   5  -9  -1    6.50    0.86
   5   9  -1    5.08    0.62
  -5   9   1    5.72    0.66
  -5   9   1    6.33    0.66
  -5   9   1    6.11    0.95
  -5   9   1    4.97    0.68
   5   9  -1    6.03    0.63
   5   9  -1    5.23    0.73
  -5   9   1    5.34    0.53
   5   9  -1    5.99    0.58
   4  -9  -1    1.06    0.26
  -4  -9   1    1.18    0.50
   4  -9  -1    0.90    0.35
  -4  -9   1    0.56    0.27
  -4  -9   1    1.05    0.26
  -4  -9   1    0.56    0.36
   4  -9  -1    1.29    0.41
   4  -9  -1    0.95    0.27
   4  -9  -1    1.08    0.31
   4   9  -1    0.36    0.35
  -4   9   1    0.31    0.38
   4   9  -1    0.47    0.30
   4   9  -1    0.79    0.23
   4   9  -1    0.76    0.30
  -4   9   1    0.73    0.28
  -4   9   1    1.12    0.30
  -4   9   1    1.13    0.34
  -3  -9   1    0.08    0.29
   3  -9  -1   -0.07    0.16
   3  -9  -1   -0.10    0.19
   3  -9  -1   -0.04    0.39
   3  -9  -1    0.12    0.28
  -3  -9   1    0.19    0.25
  -3   9   1   -0.03    0.37
  -3   9   1    0.12    0.25
   3   9  -1   -0.33    0.28
  -3   9   1    0.03    0.21
   3   9  -1   -0.30    0.20
  -3   9   1   -0.15    0.15
   3   9  -1   -0.19    0.15
   3   9  -1   -0.38    0.21
   2  -9  -1    0.31    0.15
   2  -9  -1    0.57    0.30
  -2  -9   1    0.07    0.14
   2  -9  -1   -0.07    0.18
  -2  -9   1    0.05    0.31
  -2  -9   1    0.05    0.14
  -2  -9   1    0.25    0.09
  -2  -9   1   -0.14    0.14
   2  -9  -1    0.09    0.17
   2  -9  -1    0.29    0.29
  -2   9   1   -0.37    0.25
   2   9  -1    0.11    0.09
   2   9  -1   -0.10    0.23
  -2   9   1    0.46    0.34
   2   9  -1   -0.11    0.23
  -2   9   1    0.24    0.16
  -2   9   1   -0.31    0.25
   2   9  -1    0.23    0.12
   2   9  -1   -0.01    0.18
  -1  -9   1   18.91    1.15
   1  -9  -1   19.49    1.18
  -1  -9   1   19.68    1.22
  -1  -9   1   18.78    1.10
  -1  -9   1   19.73    1.09
   1  -9  -1   18.30    1.17
   1  -9  -1   16.78    1.12
   1  -9  -1   19.83    1.22
   1  -9  -1   19.72    1.16
  -1  -9   1   19.27    1.17
  -1   9   1   18.19    1.17
  -1   9   1   18.65    1.19
   1   9  -1   17.62    1.09
  -1   9   1   17.68    1.16
   1   9  -1   19.62    1.11
  -1   9   1   18.12    1.20
   1   9  -1   18.36    1.16
   1   9  -1   18.49    1.15
   1   9  -1   18.43    1.18
   0  -9  -1    1.79    0.28
   0  -9  -1    1.64    0.35
   0  -9   1    2.11    0.23
   0  -9   1    2.36    0.33
   0  -9   1    2.31    0.28
   0  -9  -1    1.68    0.32
   0  -9  -1    1.39    0.27
   0   9   1    1.25    0.19
   0   9   1    1.22    0.20
   0   9   1    1.72    0.38
   0   9   1    1.30    0.29
   0   9  -1    1.89    0.31
   0   9   1    1.23    0.22
   1  -9   1    1.68    0.12
  -1  -9  -1    2.03    0.28
   1  -9   1    1.60    0.11
  -1  -9  -1    1.54    0.35
   1  -9   1    1.48    0.25
  -1  -9  -1    2.53    0.38
  -1  -9  -1    1.50    0.31
   1  -9   1    1.80    0.31
   1  -9   1    1.69    0.23
   1  -9   1    2.07    0.35
  -1  -9  -1    1.68    0.26
  -1   9  -1    2.15    0.34
   1   9   1    2.16    0.33
   1   9   1    1.57    0.30
  -1   9  -1    1.90    0.37
   1   9   1    1.82    0.31
  -1   9  -1    1.68    0.29
   1   9   1    1.22    0.27
   1   9   1    1.65    0.27
  -2  -9  -1    4.61    0.43
  -2  -9  -1    3.68    0.39
   2  -9   1    4.42    0.44
  -2  -9  -1    4.22    0.36
  -2  -9  -1    4.12    0.34
   2  -9   1    3.89    0.26
   2  -9   1    3.74    0.44
   2  -9   1    4.31    0.44
  -2  -9  -1    4.41    0.47
   2  -9   1    4.37    0.45
   2   9   1    3.43    0.39
   2   9   1    3.21    0.33
  -2   9  -1    4.04    0.47
  -2   9  -1    4.14    0.45
   2   9   1    3.18    0.37
   2   9   1    3.40    0.34
  -2   9  -1    3.85    0.39
  -2   9  -1    3.63    0.40
   2   9   1    4.35    0.48
   3  -9   1    0.40    0.31
   3  -9   1    0.05    0.15
   3  -9   1    0.44    0.29
  -3  -9  -1    0.62    0.27
   3  -9   1    0.44    0.13
  -3  -9  -1    0.36    0.15
  -3  -9  -1    0.12    0.28
  -3  -9  -1    0.46    0.31
   3  -9   1    0.53    0.32
  -3  -9  -1    0.31    0.20
   3   9   1    0.55    0.22
   3   9   1    0.00    0.23
   3   9   1    0.51    0.36
  -3   9  -1    0.70    0.40
  -3   9  -1    0.44    0.26
  -3   9  -1    0.21    0.14
   3   9   1    0.74    0.26
  -3   9  -1    0.10    0.26
  -3   9  -1    0.31    0.29
  -4  -9  -1    0.65    0.43
   4  -9   1    1.22    0.36
   4  -9   1    1.26    0.43
   4  -9   1    0.82    0.38
  -4  -9  -1    0.49    0.25
  -4  -9  -1    0.89    0.33
  -4  -9  -1    0.77    0.18
  -4  -9  -1    0.57    0.39
   4  -9   1    0.69    0.21
  -4  -9  -1    1.02    0.20
   4  -9   1    1.27    0.31
  -4   9  -1    0.70    0.36
  -4   9  -1    1.59    0.43
  -4   9  -1    0.99    0.35
   4   9   1    0.50    0.27
   4   9   1    1.31    0.40
   4   9   1    0.94    0.44
   4   9   1    1.17    0.55
  -4   9  -1    1.22    0.46
  -4   9  -1    0.63    0.19
   5  -9   1    2.38    0.40
   5  -9   1    3.03    0.47
  -5  -9  -1    3.06    0.57
  -5  -9  -1    2.50    0.31
  -5  -9  -1    3.06    0.50
  -5  -9  -1    3.34    0.55
   5  -9   1    3.01    0.59
  -5  -9  -1    3.07    0.29
   5  -9   1    3.70    0.53
   5  -9   1    3.42    0.43
  -5   9  -1    2.61    0.47
  -5   9  -1    3.22    0.70
   5   9   1    3.35    0.58
   5   9   1    2.49    0.67
   5   9   1    3.64    0.64
  -5   9  -1    2.61    0.45
  -5   9  -1    4.02    0.62
  -5   9  -1    2.98    0.55
   5   9   1    2.99    0.52
  -6  -9  -1    0.61    0.15
   6  -9   1    0.74    0.51
   6  -9   1    0.71    0.45
  -6  -9  -1    0.97    0.46
  -6  -9  -1    0.55    0.73
  -6  -9  -1    0.60    0.39
  -6  -9  -1    0.48    0.17
   6  -9   1   -0.35    0.46
  -6  -9  -1    0.07    1.04
   6  -9   1    0.46    0.33
  -6   9  -1   -0.22    0.62
   6   9   1    1.04    0.55
  -6   9  -1    0.86    0.33
  -6   9  -1    0.56    0.30
  -6   9  -1    0.50    0.64
   6   9   1    1.41    0.56
   7  -9   1    2.44    1.04
  -7  -9  -1    0.06    0.52
   7  -9   1    0.65    0.86
   7  -9   1    0.12    0.63
  -7  -9  -1    0.26    0.50
   7   9   1    0.52    0.57
  -7   9  -1   -0.14    0.60
   7   9   1    0.37    0.76
  -7   9  -1    0.08    0.84
  -7   9  -1    1.86    0.79
   7   9   1    0.59    0.80
  -8  -9  -1    0.57    0.82
   8  -9   1   -0.69    1.08
  -8   9  -1   -1.05    1.09
  -7 -10   1    3.45    0.80
   7 -10  -1    4.15    1.07
  -7 -10   1    3.22    0.53
   7 -10  -1    3.03    0.64
   7 -10  -1    2.94    1.14
  -7  10   1    2.06    0.64
  -7  10   1    4.32    0.68
  -6 -10   1    0.22    0.49
  -6 -10   1   -0.03    0.47
   6 -10  -1    0.39    0.34
   6 -10  -1    0.77    0.70
   6 -10  -1    0.89    0.72
   6 -10  -1    0.96    0.45
   6  10  -1    0.61    0.42
  -6  10   1    0.43    0.52
  -6  10   1    1.78    0.83
  -6  10   1   -0.21    0.51
   5 -10  -1    0.77    0.30
  -5 -10   1    0.48    0.45
  -5 -10   1   -0.10    0.47
  -5 -10   1    0.33    0.36
   5 -10  -1    0.31    0.76
  -5 -10   1    0.32    0.51
   5 -10  -1    0.79    0.62
   5 -10  -1    0.14    0.23
   5 -10  -1    0.26    0.27
  -5  10   1    0.56    0.43
  -5  10   1    0.43    0.40
  -5  10   1    0.62    0.51
   5  10  -1    0.32    0.44
  -5  10   1    0.21    0.66
   5  10  -1    0.09    0.66
   5  10  -1    0.29    0.54
   5  10  -1    0.09    0.31
   4 -10  -1   -0.32    0.50
   4 -10  -1   -0.06    0.41
   4 -10  -1   -0.17    0.28
  -4 -10   1   -0.39    0.24
  -4 -10   1    0.12    0.40
   4 -10  -1   -0.12    0.20
   4 -10  -1    0.10    0.43
  -4 -10   1   -0.11    0.24
  -4  10   1   -0.21    0.38
  -4  10   1    0.15    0.34
   4  10  -1   -0.54    0.41
  -4  10   1    0.18    0.62
   4  10  -1   -0.16    0.36
  -4  10   1   -0.51    0.28
   4  10  -1   -0.09    0.38
   4  10  -1   -0.06    0.24
  -3 -10   1    0.03    0.16
   3 -10  -1   -0.40    0.34
  -3 -10   1   -0.09    0.29
   3 -10  -1   -0.14    0.19
   3 -10  -1   -0.07    0.18
  -3 -10   1   -0.54    0.30
  -3 -10   1    0.09    0.28
   3 -10  -1   -0.29    0.27
   3 -10  -1   -0.31    0.24
   3  10  -1   -0.10    0.17
   3  10  -1   -0.18    0.20
  -3  10   1   -0.42    0.34
  -3  10   1    0.19    0.28
   3  10  -1    0.06    0.38
  -3  10   1   -0.13    0.30
   2 -10  -1    7.93    0.61
   2 -10  -1    8.78    0.70
   2 -10  -1    8.45    0.68
  -2 -10   1    8.88    0.66
  -2 -10   1    8.84    0.54
  -2 -10   1    9.21    0.57
   2 -10  -1    9.31    0.73
   2 -10  -1    9.52    0.67
  -2 -10   1    8.85    0.69
  -2 -10   1    9.04    0.73
  -2  10   1    8.48    0.65
  -2  10   1    8.51    0.68
   2  10  -1    7.55    0.65
   2  10  -1    8.88    0.65
   2  10  -1    8.44    0.54
   2  10  -1    8.50    0.60
  -2  10   1    8.12    0.70
  -2  10   1    8.40    0.66
   2  10  -1    8.97    0.74
  -1 -10   1  113.99    6.22
  -1 -10   1  107.71    6.11
   1 -10  -1  112.20    6.21
  -1 -10   1  112.03    6.18
  -1 -10   1  108.79    6.10
  -1 -10   1  109.82    6.18
   1 -10  -1  111.09    6.20
   1 -10  -1  114.73    6.20
   1 -10  -1   97.40    6.13
   1  10  -1  105.47    6.12
  -1  10   1  108.82    6.19
   1  10  -1  111.19    6.19
   1  10  -1   99.56    6.10
  -1  10   1  107.86    6.22
   1  10  -1  109.77    6.17
  -1  10   1  111.89    6.19
  -1  10   1  106.78    6.17
   1  10  -1  108.27    6.20
   0 -10  -1   19.19    1.12
   0 -10  -1   16.23    1.09
   0 -10  -1   17.51    1.17
   0 -10   1   18.09    1.18
   0 -10   1   18.77    1.10
   0 -10  -1   18.61    1.16
   0 -10   1   18.88    1.15
   0 -10  -1   19.40    1.20
   0 -10   1   18.25    1.16
   0  10   1   18.52    1.23
   0  10   1   17.94    1.17
   0  10   1   17.94    1.15
   0  10  -1   16.89    1.14
   0  10  -1   18.43    1.16
   0  10  -1   19.03    1.11
   0  10   1   17.55    1.13
   1 -10   1   14.46    0.95
   1 -10   1   14.31    0.93
  -1 -10  -1   14.38    0.96
   1 -10   1   13.27    0.79
  -1 -10  -1   15.24    0.87
   1 -10   1   13.82    0.88
  -1 -10  -1   13.98    0.88
   1 -10   1   14.20    0.92
  -1 -10  -1   14.28    0.96
  -1 -10  -1   14.42    0.96
   1 -10   1   13.61    0.79
  -1  10  -1   13.32    0.94
   1  10   1   13.21    0.93
  -1  10  -1   14.10    0.92
  -1  10  -1   14.66    0.95
   1  10   1   11.91    0.87
  -1  10  -1   14.69    0.90
   1  10   1   13.89    0.91
   1  10   1   13.11    0.88
   1  10   1   13.95    0.92
   2 -10   1    2.18    0.35
   2 -10   1    1.36    0.16
  -2 -10  -1    1.50    0.31
   2 -10   1    1.44    0.14
  -2 -10  -1    1.53    0.35
   2 -10   1    1.68    0.29
   2 -10   1    1.66    0.36
  -2 -10  -1    1.26    0.25
   2 -10   1    1.86    0.36
  -2 -10  -1    1.58    0.28
  -2 -10  -1    1.54    0.26
   2  10   1    2.19    0.40
  -2  10  -1    1.93    0.31
  -2  10  -1    1.59    0.34
   2  10   1    1.62    0.31
  -2  10  -1    1.65    0.29
   2  10   1    1.38    0.23
   2  10   1    1.40    0.31
   2  10   1    1.59    0.29
   3 -10   1   -0.15    0.12
   3 -10   1   -0.27    0.22
  -3 -10  -1    0.27    0.39
   3 -10   1   -0.02    0.11
   3 -10   1   -0.32    0.31
  -3 -10  -1    0.21    0.33
   3 -10   1   -0.07    0.33
  -3 -10  -1    0.32    0.37
  -3 -10  -1    0.09    0.15
  -3 -10  -1   -0.08    0.20
   3  10   1   -0.46    0.29
  -3  10  -1   -0.18    0.24
  -3  10  -1   -0.14    0.34
   3  10   1   -0.12    0.21
  -3  10  -1   -0.17    0.25
   3  10   1    0.14    0.37
   3  10   1   -0.09    0.37
  -3  10  -1   -0.06    0.22
  -4 -10  -1    0.02    0.45
  -4 -10  -1   -0.12    0.17
   4 -10   1    0.06    0.42
  -4 -10  -1   -0.16    0.23
   4 -10   1    0.12    0.28
  -4 -10  -1   -0.35    0.43
  -4 -10  -1   -0.23    0.31
  -4 -10  -1    0.06    0.14
   4 -10   1   -0.21    0.17
   4 -10   1   -0.18    0.34
  -4  10  -1   -0.09    0.32
   4  10   1   -0.23    0.41
  -4  10  -1    0.35    0.35
  -4  10  -1    0.12    0.33
  -4  10  -1    0.54    0.55
   4  10   1    0.58    0.34
  -4  10  -1   -0.13    0.19
   5 -10   1    2.44    0.72
   5 -10   1    2.53    0.41
   5 -10   1    3.03    0.60
  -5 -10  -1    3.67    0.76
  -5 -10  -1    1.93    0.58
  -5 -10  -1    2.76    0.53
  -5 -10  -1    2.91    0.29
  -5 -10  -1    3.06    0.31
   5 -10   1    3.28    0.64
   5  10   1    3.36    0.74
   5  10   1    2.85    0.53
   5  10   1    3.32    0.55
  -5  10  -1    4.80    0.80
  -5  10  -1    3.63    0.64
  -5  10  -1    3.23    0.46
  -5  10  -1    4.45    0.67
   5  10   1    2.84    0.66
   6 -10   1    0.47    0.33
  -6 -10  -1    0.81    0.14
  -6 -10  -1    2.25    0.83
  -6 -10  -1    0.15    0.68
  -6 -10  -1   -0.14    0.82
  -6 -10  -1    0.48    0.40
   6 -10   1    0.32    0.69
   6 -10   1    0.09    0.72
   6 -10   1   -0.45    0.49
  -6  10  -1    0.26    0.64
  -6  10  -1    0.25    0.33
   6  10   1    1.24    0.71
  -6  10  -1    1.45    0.75
  -6  10  -1    1.10    0.34
   6  10   1    0.68    0.43
   6  10   1    1.23    0.74
  -6  10  -1    1.77    0.62
   7 -10   1    0.25    0.72
  -7 -10  -1   -0.08    0.48
   7 -10   1   -1.40    0.91
  -7 -10  -1   -1.19    0.96
  -7  10  -1    1.06    0.63
  -7  10  -1    1.69    0.86
  -7  10  -1   -0.04    0.47
  -7  10  -1   -0.36    0.65
  -7 -11   1    4.69    0.74
   7 -11  -1    1.79    0.95
   7 -11  -1    2.27    0.99
  -7 -11   1    3.43    0.73
  -7  11   1    2.88    0.74
  -7  11   1    5.23    0.94
  -7  11   1    3.27    0.84
   6 -11  -1    0.22    0.78
  -6 -11   1    0.30    0.51
   6 -11  -1   -0.80    0.90
   6 -11  -1   -0.21    0.34
  -6 -11   1   -0.14    0.77
  -6 -11   1    0.25    0.71
   6 -11  -1    0.38    0.39
   6  11  -1   -0.11    0.95
  -6  11   1    0.69    0.80
  -6  11   1   -0.40    0.36
  -6  11   1    0.02    1.13
  -6  11   1    0.07    0.45
   5 -11  -1    1.03    0.43
   5 -11  -1    1.55    0.62
   5 -11  -1    1.60    0.37
  -5 -11   1    1.62    0.89
  -5 -11   1    1.00    0.35
   5 -11  -1    1.19    0.32
   5 -11  -1    2.22    0.80
  -5 -11   1    0.93    0.32
  -5  11   1    1.53    0.42
  -5  11   1    1.89    0.53
   5  11  -1    1.04    0.61
  -5  11   1    0.94    0.49
  -5  11   1    0.72    0.49
   5  11  -1    1.78    0.75
   5  11  -1    0.88    0.38
   4 -11  -1    0.19    0.45
   4 -11  -1    0.62    0.48
  -4 -11   1    0.22    0.33
  -4 -11   1    0.27    0.29
   4 -11  -1   -0.12    0.39
   4 -11  -1    0.05    0.23
  -4 -11   1    0.03    0.24
   4 -11  -1    0.36    0.33
  -4  11   1    0.63    0.27
  -4  11   1    0.49    0.40
   4  11  -1   -0.05    0.21
   4  11  -1    0.29    0.33
  -4  11   1    0.02    0.31
  -4  11   1   -0.10    0.62
   4  11  -1    0.58    0.57
   4  11  -1    0.50    0.47
  -3 -11   1   -0.09    0.33
  -3 -11   1   -0.17    0.25
   3 -11  -1   -0.35    0.49
   3 -11  -1   -0.11    0.31
  -3 -11   1   -0.12    0.17
   3 -11  -1   -0.17    0.19
  -3 -11   1   -0.18    0.46
   3 -11  -1   -0.06    0.49
   3  11  -1   -0.51    0.31
  -3  11   1   -0.33    0.21
  -3  11   1   -0.09    0.37
  -3  11   1    0.24    0.58
   3  11  -1    0.27    0.46
  -3  11   1   -0.01    0.25
   3  11  -1   -0.02    0.23
  -2 -11   1    2.81    0.25
  -2 -11   1    2.32    0.45
   2 -11  -1    2.50    0.46
   2 -11  -1    2.30    0.43
  -2 -11   1    2.79    0.42
   2 -11  -1    2.19    0.34
  -2 -11   1    2.22    0.44
  -2 -11   1    2.71    0.28
   2 -11  -1    1.65    0.38
   2 -11  -1    2.49    0.39
   2 -11  -1    2.03    0.32
   2  11  -1    2.16    0.25
   2  11  -1    2.09    0.38
   2  11  -1    2.59    0.37
   2  11  -1    2.38    0.30
  -2  11   1    2.12    0.36
   2  11  -1    2.30    0.49
  -2  11   1    2.96    0.54
  -2  11   1    2.47    0.41
  -2  11   1    2.33    0.33
   1 -11  -1   22.14    1.38
   1 -11  -1   24.21    1.40
  -1 -11   1   22.07    1.28
  -1 -11   1   22.58    1.36
  -1 -11   1   21.13    1.37
  -1 -11   1   22.57    1.26
   1 -11  -1   23.97    1.35
  -1 -11   1   22.39    1.42
   1 -11  -1   19.40    1.30
   1 -11  -1   22.10    1.43
  -1  11   1   21.51    1.36
   1  11  -1   18.96    1.27
  -1  11   1   21.20    1.40
   1  11  -1   21.30    1.29
   1  11  -1   22.56    1.42
   1  11  -1   20.84    1.36
  -1  11   1   22.19    1.39
   1  11  -1   20.87    1.36
  -1  11   1   21.04    1.36
   0 -11  -1    0.92    0.29
   0 -11  -1    0.46    0.19
   0 -11  -1    1.07    0.28
   0 -11   1    0.70    0.26
   0 -11   1    1.11    0.36
   0 -11   1    0.62    0.18
   0 -11  -1    0.86    0.25
   0 -11  -1    0.38    0.16
   0 -11   1    0.78    0.29
   0  11   1    0.85    0.33
   0  11   1    0.94    0.42
   0  11  -1    0.71    0.16
   0  11   1    0.37    0.21
   0  11   1    0.53    0.22
   1 -11   1   -0.23    0.19
   1 -11   1    0.07    0.04
   1 -11   1    0.03    0.04
   1 -11   1    0.25    0.24
  -1 -11  -1    0.05    0.27
   1 -11   1   -0.30    0.23
  -1 -11  -1    0.05    0.31
  -1 -11  -1   -0.04    0.17
  -1 -11  -1    0.38    0.31
   1 -11   1    0.28    0.34
  -1 -11  -1    0.11    0.15
   1  11   1   -0.04    0.18
  -1  11  -1    0.06    0.18
   1  11   1   -0.05    0.12
   1  11   1    0.05    0.18
   1  11   1    0.17    0.29
   1  11   1    0.18    0.33
  -1  11  -1    0.14    0.27
  -2 -11  -1   -0.25    0.20
  -2 -11  -1    0.11    0.19
   2 -11   1    0.16    0.09
   2 -11   1   -0.24    0.22
  -2 -11  -1    0.18    0.27
  -2 -11  -1    0.08    0.26
   2 -11   1    0.06    0.19
  -2 -11  -1   -0.05    0.13
   2 -11   1   -0.01    0.32
   2 -11   1    0.05    0.07
   2 -11   1   -0.21    0.25
  -2  11  -1    0.21    0.40
   2  11   1    0.04    0.30
  -2  11  -1    0.19    0.22
   2  11   1    0.32    0.33
   2  11   1    0.13    0.21
   2  11   1   -0.02    0.21
  -2  11  -1   -0.27    0.24
   2  11   1   -0.28    0.31
   3 -11   1    2.94    0.54
  -3 -11  -1    2.39    0.46
  -3 -11  -1    2.12    0.37
  -3 -11  -1    2.49    0.47
  -3 -11  -1    2.24    0.31
   3 -11   1    3.29    0.42
   3 -11   1    2.70    0.46
   3 -11   1    2.40    0.25
  -3 -11  -1    2.57    0.58
  -3  11  -1    3.06    0.57
  -3  11  -1    2.91    0.50
   3  11   1    2.08    0.36
   3  11   1    1.67    0.39
  -3  11  -1    2.59    0.40
  -3  11  -1    2.64    0.44
   3  11   1    2.32    0.64
  -4 -11  -1    1.66    0.34
   4 -11   1    1.51    0.38
   4 -11   1    2.01    0.45
   4 -11   1    1.67    0.33
  -4 -11  -1    1.18    0.31
  -4 -11  -1    1.93    0.39
  -4 -11  -1    1.44    0.29
   4 -11   1    1.86    0.30
   4 -11   1    1.72    0.44
  -4 -11  -1    1.67    0.28
  -4 -11  -1    2.31    0.62
   4  11   1    1.44    0.32
  -4  11  -1    1.93    0.54
  -4  11  -1    1.81    0.38
  -4  11  -1    2.04    0.54
   4  11   1    1.43    0.36
   4  11   1    1.86    0.48
  -4  11  -1    2.31    0.43
   4  11   1    1.27    0.46
   5 -11   1    7.92    0.96
   5 -11   1    8.66    0.84
  -5 -11  -1    6.97    0.99
   5 -11   1    7.17    1.02
  -5 -11  -1    8.34    0.71
   5 -11   1    6.93    0.58
  -5 -11  -1    6.88    0.48
  -5 -11  -1    6.97    0.48
  -5 -11  -1    8.62    1.03
  -5  11  -1    7.18    0.97
  -5  11  -1    6.99    0.77
  -5  11  -1    7.80    0.69
   5  11   1    6.46    0.83
  -5  11  -1    5.75    0.62
   5  11   1    6.73    1.02
   5  11   1    7.07    0.83
  -5  11  -1    8.55    0.85
  -6 -11  -1    0.77    0.55
  -6 -11  -1   -0.30    0.46
   6 -11   1    0.30    0.90
   6 -11   1   -1.14    0.77
  -6 -11  -1   -0.03    0.44
   6 -11   1    0.28    0.35
   6 -11   1   -0.12    0.41
  -6 -11  -1    0.41    0.41
  -6  11  -1   -0.16    0.56
  -6  11  -1    0.01    0.74
   6  11   1    1.05    0.68
  -6  11  -1    0.07    0.76
   6  11   1   -1.20    0.80
   6  11   1   -0.21    0.46
  -6  11  -1    0.68    0.36
  -7 -11  -1    0.00    0.96
   7 -12  -1    0.23    1.11
  -7 -12   1    0.42    0.51
  -7 -12   1   -0.19    0.97
  -7  12   1   -1.03    0.66
  -7  12   1    0.50    0.65
  -6 -12   1    1.17    0.56
   6 -12  -1    0.37    0.38
   6 -12  -1    0.33    1.00
   6 -12  -1   -0.58    0.74
  -6 -12   1    0.33    1.20
   6 -12  -1    1.36    0.83
  -6 -12   1   -0.15    0.53
  -6  12   1   -0.02    0.38
  -6  12   1   -0.29    0.72
   5 -12  -1    0.48    0.62
  -5 -12   1    0.06    0.41
   5 -12  -1   -0.62    0.41
  -5 -12   1    0.22    0.60
  -5 -12   1    0.26    0.79
  -5 -12   1   -0.27    0.52
   5 -12  -1    0.16    0.51
   5 -12  -1    0.44    0.35
   5  12  -1   -0.55    0.71
  -5  12   1   -0.46    0.45
  -5  12   1    0.96    0.95
   5  12  -1   -0.21    0.45
  -5  12   1   -0.46    0.34
  -5  12   1    0.26    0.33
   5  12  -1    0.35    0.51
  -4 -12   1   -0.34    0.44
   4 -12  -1    0.18    0.39
   4 -12  -1   -0.11    0.24
   4 -12  -1   -0.07    0.62
  -4 -12   1   -0.37    0.28
   4 -12  -1   -0.06    0.33
   4 -12  -1   -0.05    0.18
  -4 -12   1   -0.61    0.42
   4  12  -1    0.27    0.41
   4  12  -1   -0.42    0.35
   4  12  -1   -0.30    0.35
   4  12  -1    0.07    0.60
  -4  12   1   -0.47    0.32
  -4  12   1   -0.11    0.29
  -4  12   1    0.10    0.40
  -3 -12   1    1.16    0.28
   3 -12  -1    0.80    0.50
  -3 -12   1    0.58    0.22
   3 -12  -1    0.51    0.28
   3 -12  -1    0.75    0.25
   3 -12  -1    0.49    0.39
   3 -12  -1    0.59    0.24
  -3 -12   1    0.82    0.14
   3 -12  -1    0.83    0.35
  -3 -12   1    0.52    0.55
  -3  12   1    0.80    0.29
  -3  12   1    0.72    0.64
   3  12  -1    0.59    0.42
  -3  12   1    0.78    0.44
  -3  12   1    1.12    0.42
   3  12  -1    1.01    0.56
   2 -12  -1    0.05    0.14
  -2 -12   1    0.16    0.17
   2 -12  -1    0.31    0.22
  -2 -12   1   -0.04    0.34
   2 -12  -1    0.23    0.20
  -2 -12   1    0.22    0.35
  -2 -12   1    0.26    0.14
   2 -12  -1    0.21    0.42
  -2 -12   1    0.16    0.32
   2 -12  -1    0.18    0.25
   2 -12  -1   -0.48    0.32
  -2  12   1   -0.39    0.33
   2  12  -1    0.48    0.20
  -2  12   1    0.50    0.54
  -2  12   1   -0.06    0.26
  -2  12   1   -0.13    0.20
   2  12  -1    0.22    0.15
   2  12  -1   -0.02    0.30
   2  12  -1    0.08    0.32
   2  12  -1    0.20    0.16
   1 -12  -1    1.45    0.41
  -1 -12   1    1.57    0.46
   1 -12  -1    1.73    0.28
   1 -12  -1    1.48    0.36
  -1 -12   1    1.33    0.28
  -1 -12   1    1.21    0.20
   1 -12  -1    1.27    0.35
   1 -12  -1    1.32    0.28
  -1 -12   1    1.10    0.29
   1  12  -1    1.06    0.19
  -1  12   1    1.44    0.32
   1  12  -1    1.70    0.45
   1  12  -1    1.19    0.26
   1  12  -1    1.71    0.29
  -1  12   1    1.09    0.27
  -1  12   1    1.40    0.27
  -1  12   1    1.35    0.37
   0 -12  -1    1.13    0.27
   0 -12   1    0.78    0.22
   0 -12  -1    1.55    0.36
   0 -12   1    0.94    0.27
   0 -12   1    0.96    0.20
   0 -12  -1    1.14    0.34
   0 -12  -1    1.07    0.22
   0 -12   1    1.22    0.36
   0 -12   1    1.60    0.44
   0 -12  -1    1.07    0.27
   0  12  -1    0.52    0.26
   0  12   1    1.12    0.47
   0  12  -1    1.10    0.37
   0  12   1    0.82    0.33
   0  12   1    0.89    0.23
   0  12  -1    0.84    0.29
   0  12  -1    0.99    0.24
   0  12   1    0.95    0.29
   1 -12   1   -0.11    0.20
   1 -12   1   -0.03    0.21
  -1 -12  -1    0.22    0.34
  -1 -12  -1   -0.27    0.20
   1 -12   1   -0.46    0.26
  -1 -12  -1   -0.37    0.38
  -1 -12  -1    0.17    0.23
  -1 -12  -1    0.01    0.15
   1 -12   1    0.12    0.34
   1  12   1    0.30    0.45
  -1  12  -1    0.07    0.24
   1  12   1    0.14    0.19
   1  12   1   -0.20    0.19
   1  12   1   -0.15    0.24
  -1  12  -1   -0.21    0.30
   1  12   1    0.01    0.22
  -1  12  -1   -0.15    0.31
   2 -12   1   -0.27    0.24
  -2 -12  -1   -0.17    0.17
  -2 -12  -1   -0.10    0.18
  -2 -12  -1    0.20    0.33
   2 -12   1    0.06    0.36
   2 -12   1   -0.07    0.07
   2 -12   1    0.20    0.34
   2 -12   1   -0.39    0.27
  -2 -12  -1    0.15    0.36
   2  12   1   -0.07    0.21
   2  12   1   -0.06    0.23
  -2  12  -1   -0.18    0.24
  -2  12  -1    0.32    0.39
  -2  12  -1   -0.13    0.37
   2  12   1   -0.13    0.26
   2  12   1   -0.01    0.43
  -2  12  -1    0.22    0.47
   2  12   1   -0.45    0.31
   3 -12   1    0.25    0.42
  -3 -12  -1   -0.20    0.22
   3 -12   1   -0.14    0.13
  -3 -12  -1   -0.05    0.51
  -3 -12  -1   -0.25    0.20
   3 -12   1   -0.16    0.40
   3 -12   1    0.30    0.24
   3 -12   1    0.09    0.13
  -3 -12  -1    0.62    0.28
  -3 -12  -1    0.20    0.18
  -3  12  -1    0.39    0.47
   3  12   1   -0.07    0.25
   3  12   1    0.16    0.48
  -3  12  -1    0.23    0.41
  -3  12  -1   -0.23    0.46
  -3  12  -1   -0.27    0.21
   3  12   1    0.32    0.49
   4 -12   1    0.98    0.58
   4 -12   1    0.65    0.43
  -4 -12  -1    1.18    0.61
  -4 -12  -1    0.40    0.54
  -4 -12  -1    0.64    0.41
  -4 -12  -1    1.10    0.26
  -4 -12  -1    1.10    0.19
   4 -12   1    1.33    0.23
   4 -12   1    0.76    0.54
   4 -12   1    1.92    0.47
  -4 -12  -1    0.96    0.33
  -4  12  -1    1.42    0.58
  -4  12  -1    1.18    0.53
   4  12   1    0.45    0.42
   4  12   1    1.08    0.52
  -4  12  -1    1.35    0.53
   4  12   1    1.18    0.36
   4  12   1    1.16    0.62
  -4  12  -1    1.42    0.36
  -5 -12  -1    0.03    0.46
  -5 -12  -1    0.64    0.39
   5 -12   1    0.39    0.76
  -5 -12  -1   -0.13    0.34
  -5 -12  -1    0.16    0.13
   5 -12   1    0.15    0.55
  -5 -12  -1   -0.01    0.52
   5 -12   1   -0.32    0.33
   5  12   1    0.20    0.65
   5  12   1    0.39    0.42
  -5  12  -1    0.51    0.65
  -5  12  -1    0.56    0.51
   5  12   1   -0.35    0.66
  -5  12  -1   -0.34    0.45
   6 -12   1    0.61    0.42
  -6 -12  -1    1.18    0.90
   6 -12   1   -0.26    0.72
   6 -12   1    0.83    0.94
  -6 -12  -1    0.19    0.87
   6 -12   1    1.59    0.84
  -6 -12  -1    1.30    0.45
  -6 -12  -1   -0.29    1.01
   6  12   1    2.03    0.75
  -6  12  -1    0.38    0.58
  -6  12  -1    0.02    0.65
   6  12   1   -0.61    0.65
  -6  12  -1    1.89    0.79
  -6  12  -1    0.69    0.36
  -6  12  -1    1.02    1.03
  -7 -12  -1    0.89    0.51
   7 -12   1   -1.05    1.10
  -7 -12  -1    1.18    0.76
  -7  12  -1    1.42    0.87
  -7 -13   1    1.32    0.58
  -7 -13   1   -0.72    0.98
   7 -13  -1    1.34    0.80
  -7  13   1    1.18    0.98
  -7  13   1   -0.75    0.81
  -6 -13   1   -0.79    0.61
   6 -13  -1    0.53    0.59
  -6 -13   1    0.21    0.59
  -6 -13   1    1.75    1.27
   6 -13  -1    0.88    0.42
   6 -13  -1    0.29    0.87
   6 -13  -1   -1.14    0.81
  -6  13   1   -0.21    0.56
  -6  13   1    0.69    0.42
   5 -13  -1   -0.05    0.74
  -5 -13   1    0.77    0.47
  -5 -13   1    1.14    0.59
  -5 -13   1    1.09    0.70
   5 -13  -1   -0.87    0.83
   5 -13  -1   -0.17    0.38
   5 -13  -1    0.59    0.35
  -5 -13   1    0.72    0.66
  -5  13   1   -0.15    0.62
   5  13  -1   -0.46    0.50
  -5  13   1   -0.48    0.30
  -5  13   1   -0.43    0.79
   5  13  -1    0.67    0.78
  -5  13   1    0.76    1.09
   4 -13  -1   -0.25    0.43
   4 -13  -1    0.56    0.55
  -4 -13   1   -0.37    0.27
  -4 -13   1    0.37    0.54
  -4 -13   1    0.26    0.77
   4 -13  -1    0.16    0.36
   4 -13  -1   -0.43    0.38
   4  13  -1   -0.11    0.38
  -4  13   1   -0.66    0.37
   4  13  -1   -0.17    0.65
  -4  13   1   -0.26    0.33
  -4  13   1   -0.11    0.35
   4  13  -1    0.62    0.46
  -4  13   1    0.20    0.75
   3 -13  -1   -0.34    0.39
   3 -13  -1    0.25    0.43
  -3 -13   1   -0.41    0.50
   3 -13  -1    0.01    0.24
  -3 -13   1   -0.26    0.34
  -3 -13   1   -0.34    0.21
  -3 -13   1   -0.40    0.39
  -3 -13   1    0.10    0.12
   3 -13  -1   -0.11    0.21
  -3  13   1    0.16    0.30
   3  13  -1    0.03    0.30
  -3  13   1    0.19    0.33
  -3  13   1   -0.14    0.35
   3  13  -1    0.05    0.28
  -3  13   1   -0.50    0.54
   3  13  -1   -0.45    0.33
  -2 -13   1    0.09    0.18
   2 -13  -1   -0.48    0.47
   2 -13  -1   -0.52    0.37
   2 -13  -1   -0.15    0.20
   2 -13  -1    0.15    0.21
  -2 -13   1    0.15    0.38
  -2 -13   1    0.49    0.36
  -2 -13   1    0.21    0.16
  -2 -13   1    0.19    0.24
   2 -13  -1    0.04    0.22
   2  13  -1    0.15    0.19
   2  13  -1    0.00    0.16
  -2  13   1   -0.38    0.37
  -2  13   1   -0.39    0.29
  -2  13   1    0.64    0.63
   2  13  -1    0.07    0.52
  -1 -13   1    3.47    0.43
   1 -13  -1    3.41    0.63
   1 -13  -1    3.28    0.61
  -1 -13   1    4.28    0.62
   1 -13  -1    3.46    0.51
   1 -13  -1    3.63    0.38
  -1 -13   1    3.82    0.46
  -1 -13   1    3.78    0.29
   1 -13  -1    3.08    0.51
   1 -13  -1    2.61    0.40
  -1 -13   1    2.90    0.35
  -1  13   1    3.89    0.57
  -1  13   1    3.01    0.55
  -1  13   1    3.32    0.52
   1  13  -1    2.79    0.32
   1  13  -1    3.53    0.56
   1  13  -1    4.20    0.65
   1  13  -1    3.34    0.36
  -1  13   1    3.00    0.50
   1  13  -1    3.49    0.61
   0 -13   1    6.70    0.60
   0 -13  -1    6.74    0.72
   0 -13  -1    6.87    0.51
   0 -13   1    7.61    0.74
   0 -13  -1    7.91    0.73
   0 -13  -1    7.17    0.74
   0 -13   1    6.61    0.58
   0 -13  -1    6.91    0.58
   0 -13   1    5.81    0.55
   0  13   1    4.94    0.55
   0  13   1    5.53    0.60
   0  13  -1    6.53    0.56
   0  13   1    5.55    0.60
   0  13  -1    5.56    0.67
   0  13   1    6.62    0.68
   0  13  -1    6.63    0.66
   0  13  -1    5.51    0.61
   1 -13   1    2.40    0.41
  -1 -13  -1    2.40    0.54
   1 -13   1    1.95    0.41
  -1 -13  -1    1.96    0.31
   1 -13   1    2.33    0.36
  -1 -13  -1    2.48    0.51
  -1 -13  -1    2.18    0.42
   1 -13   1    3.17    0.54
  -1 -13  -1    1.91    0.55
   1  13   1    2.16    0.34
   1  13   1    1.60    0.29
   1  13   1    2.26    0.45
  -1  13  -1    3.05    0.56
  -1  13  -1    2.76    0.55
   1  13   1    3.15    0.65
  -1  13  -1    1.46    0.33
  -1  13  -1    2.68    0.40
   1  13   1    3.18    0.50
   2 -13   1    0.18    0.38
  -2 -13  -1   -0.03    0.23
  -2 -13  -1   -0.01    0.26
  -2 -13  -1   -0.44    0.32
  -2 -13  -1    0.09    0.45
   2 -13   1    0.01    0.28
   2 -13   1    0.20    0.45
  -2 -13  -1    0.37    0.36
   2 -13   1    0.00    0.07
  -2  13  -1    0.00    0.51
   2  13   1    0.17    0.27
  -2  13  -1    0.36    0.42
   2  13   1   -0.18    0.29
   2  13   1    0.13    0.38
  -2  13  -1    0.26    0.32
   2  13   1    0.25    0.31
   2  13   1   -0.09    0.39
  -3 -13  -1    0.09    0.84
   3 -13   1    0.27    0.44
   3 -13   1    0.31    0.15
   3 -13   1    0.57    0.14
  -3 -13  -1    0.08    0.26
  -3 -13  -1    0.22    0.45
   3 -13   1    0.56    0.47
  -3 -13  -1   -0.53    0.39
   3 -13   1   -0.03    0.42
   3 -13   1   -0.09    0.22
  -3 -13  -1    0.17    0.21
  -3  13  -1    0.83    0.42
  -3  13  -1    0.29    0.29
   3  13   1   -0.15    0.37
  -3  13  -1    0.75    0.50
   3  13   1    0.01    0.31
   3  13   1    0.19    0.34
  -3  13  -1    0.80    0.61
  -4 -13  -1    0.17    0.62
  -4 -13  -1    0.49    0.62
  -4 -13  -1    0.80    0.52
   4 -13   1    0.33    0.65
  -4 -13  -1    0.07    0.19
  -4 -13  -1    0.48    0.25
   4 -13   1   -0.23    0.50
   4 -13   1   -0.44    0.45
   4 -13   1    0.23    0.18
   4 -13   1    0.11    0.33
  -4  13  -1    0.55    0.47
   4  13   1    0.41    0.51
  -4  13  -1    0.23    0.37
   4  13   1   -0.95    0.64
  -4  13  -1    0.66    0.71
  -4  13  -1    0.50    0.50
   4  13   1    0.06    0.37
   4  13   1    0.02    0.47
  -5 -13  -1    4.49    0.70
  -5 -13  -1    4.02    0.60
   5 -13   1    3.91    0.86
  -5 -13  -1    4.01    0.85
   5 -13   1    3.97    0.85
   5 -13   1    5.32    0.70
  -5 -13  -1    4.63    1.04
   5 -13   1    6.45    1.00
  -5  13  -1    4.71    1.07
   5  13   1    2.83    0.79
   5  13   1    4.30    0.62
  -5  13  -1    3.38    0.81
   5  13   1    3.95    0.91
  -5  13  -1    4.26    0.90
   5  13   1    5.57    0.71
  -5  13  -1    3.88    0.82
  -6 -13  -1    1.97    1.17
   6 -13   1   -0.36    0.43
   6 -13   1    1.14    0.74
  -6 -13  -1   -0.33    1.00
  -6 -13  -1    0.44    0.51
   6 -13   1    1.59    0.72
   6 -13   1   -0.10    0.62
  -6  13  -1    0.48    0.40
   6  13   1    0.70    0.94
  -6  13  -1   -0.67    0.75
  -6  13  -1   -0.21    0.42
  -7 -13  -1    2.16    0.86
   7 -13   1   -0.07    0.84
  -6 -14   1    2.50    1.15
   6 -14  -1   -1.39    0.95
   6 -14  -1    0.73    0.58
  -6 -14   1    0.18    0.65
   6 -14  -1    0.31    0.40
  -6  14   1    0.76    0.70
  -6  14   1   -0.61    0.86
   5 -14  -1    1.82    0.97
  -5 -14   1    3.34    0.69
  -5 -14   1    3.54    0.64
   5 -14  -1    2.64    0.79
   5 -14  -1    2.56    0.65
  -5 -14   1    1.45    0.77
   5  14  -1    1.62    0.56
  -5  14   1    2.92    0.66
  -5  14   1    2.27    0.93
   5  14  -1    4.65    0.88
   4 -14  -1    1.09    0.38
   4 -14  -1    0.35    0.44
  -4 -14   1    1.19    0.44
  -4 -14   1    0.98    0.92
  -4 -14   1    0.25    0.62
  -4 -14   1    0.67    0.30
   4 -14  -1   -0.10    0.57
   4 -14  -1    1.14    0.44
   4 -14  -1   -0.10    0.59
   4  14  -1   -0.40    0.62
  -4  14   1    0.32    0.49
  -4  14   1   -0.25    1.13
   4  14  -1    0.79    0.75
  -4  14   1    0.51    0.64
   4  14  -1    0.58    0.42
  -4  14   1    1.08    0.96
   3 -14  -1    0.49    0.38
  -3 -14   1    1.14    0.50
   3 -14  -1   -0.19    0.35
  -3 -14   1    0.71    0.17
   3 -14  -1    0.59    0.50
  -3 -14   1    0.42    0.45
   3 -14  -1    0.49    0.26
  -3 -14   1    0.42    0.50
   3 -14  -1    0.48    0.30
   3 -14  -1    0.48    0.31
  -3  14   1    0.25    0.38
   3  14  -1    0.84    0.40
   3  14  -1    0.34    0.26
  -3  14   1    0.68    0.32
  -3  14   1    0.45    0.43
   2 -14  -1    0.02    0.24
  -2 -14   1    0.20    0.42
  -2 -14   1   -0.01    0.30
  -2 -14   1   -0.03    0.18
   2 -14  -1   -0.05    0.24
   2 -14  -1   -0.52    0.37
   2 -14  -1   -0.11    0.47
  -2 -14   1    0.14    0.18
  -2 -14   1    0.54    0.56
   2 -14  -1   -0.20    0.73
   2  14  -1   -0.20    0.19
   2  14  -1    0.22    0.27
  -2  14   1    0.02    0.38
   2  14  -1   -0.38    0.34
   2  14  -1    0.29    0.16
  -2  14   1   -0.03    0.24
  -2  14   1    0.28    0.71
   2  14  -1   -0.31    0.26
  -1 -14   1    7.30    0.73
   1 -14  -1    7.07    0.64
   1 -14  -1    6.85    0.70
   1 -14  -1    6.64    0.56
  -1 -14   1    8.05    0.64
  -1 -14   1    7.22    0.54
   1 -14  -1    7.18    0.85
  -1 -14   1    8.54    1.23
  -1 -14   1    7.01    0.46
   1 -14  -1    6.25    0.52
  -1  14   1    5.33    0.69
  -1  14   1    5.34    0.76
   1  14  -1    7.03    0.73
   1  14  -1    6.25    0.69
  -1  14   1    5.92    0.68
   1  14  -1    5.39    0.48
   1  14  -1    7.37    0.75
   1  14  -1    6.48    0.57
  -1  14   1    6.67    0.79
   0 -14   1    2.49    0.41
   0 -14  -1    3.24    0.52
   0 -14  -1    3.50    0.54
   0 -14  -1    3.13    0.41
   0 -14  -1    2.66    0.48
   0 -14   1    3.13    0.51
   0 -14   1    2.98    0.64
   0 -14  -1    2.61    0.45
   0 -14   1    2.94    0.49
   0  14   1    2.99    0.59
   0  14  -1    2.79    0.49
   0  14  -1    3.12    0.64
   0  14  -1    2.50    0.40
   0  14   1    2.48    0.47
   0  14   1    2.43    0.52
   0  14  -1    2.96    0.42
  -1 -14  -1    0.12    0.47
  -1 -14  -1    0.32    0.20
   1 -14   1    0.33    0.32
   1 -14   1    0.66    0.41
   1 -14   1    0.96    0.34
   1 -14   1    0.85    0.52
  -1 -14  -1    0.56    0.49
  -1 -14  -1    0.90    0.27
  -1 -14  -1   -0.26    0.58
   1  14   1    0.37    0.28
  -1  14  -1    0.68    0.47
  -1  14  -1    0.65    0.33
   1  14   1    1.37    0.45
  -1  14  -1    0.42    0.60
  -1  14  -1   -0.35    0.40
   1  14   1   -0.03    0.37
   1  14   1    0.88    0.45
  -2 -14  -1    1.07    0.38
  -2 -14  -1    1.42    0.37
  -2 -14  -1    1.85    0.50
   2 -14   1    1.75    0.53
  -2 -14  -1    1.80    0.36
   2 -14   1    1.15    0.37
   2 -14   1    1.18    0.52
  -2 -14  -1    1.33    0.48
   2  14   1    1.66    0.43
  -2  14  -1    1.44    0.61
  -2  14  -1    1.06    0.50
   2  14   1    1.48    0.50
   2  14   1    1.12    0.48
  -2  14  -1    1.46    0.51
   2  14   1    1.23    0.34
  -2  14  -1    1.39    0.31
   2  14   1    0.82    0.32
  -3 -14  -1   -0.03    0.27
   3 -14   1   -0.25    0.24
  -3 -14  -1    0.08    0.21
  -3 -14  -1   -0.50    0.47
   3 -14   1    0.13    0.14
   3 -14   1    0.26    0.59
   3 -14   1    0.06    0.43
   3 -14   1    0.18    0.12
  -3 -14  -1    0.62    0.54
  -3 -14  -1    0.11    0.59
  -3  14  -1    0.30    0.68
   3  14   1   -0.79    0.51
  -3  14  -1    0.26    0.53
  -3  14  -1    0.25    0.28
  -3  14  -1    0.05    0.47
   3  14   1   -0.43    0.32
   3  14   1    0.73    0.62
  -4 -14  -1    0.89    0.68
   4 -14   1    0.20    0.55
  -4 -14  -1    0.44    0.43
  -4 -14  -1    0.01    0.19
  -4 -14  -1    0.35    0.58
  -4 -14  -1    0.76    0.47
   4 -14   1    0.40    0.19
   4 -14   1    1.28    0.57
   4 -14   1    0.61    0.62
  -4  14  -1   -0.07    0.32
   4  14   1   -0.81    0.63
   4  14   1    0.77    0.45
   4  14   1    0.65    0.66
  -4  14  -1    0.10    0.86
  -4  14  -1   -0.21    0.53
   4  14   1   -0.54    0.67
   5 -14   1   -0.11    0.89
  -5 -14  -1   -0.81    0.64
   5 -14   1   -0.02    0.93
   5 -14   1    0.45    0.58
  -5 -14  -1    1.58    0.77
  -5 -14  -1   -0.87    0.94
  -5 -14  -1   -0.02    0.34
  -5  14  -1    0.88    0.38
  -5  14  -1   -0.91    0.96
  -5  14  -1   -0.03    0.34
   5  14   1    1.25    0.59
   5  14   1   -0.21    0.51
  -5  14  -1    0.33    0.79
   6 -14   1   -0.38    0.91
  -6 -14  -1    0.50    0.59
   6 -14   1    2.25    0.69
  -6 -14  -1    0.89    0.81
  -6  14  -1   -0.26    0.91
  -6  14  -1    1.37    0.53
   6 -15  -1    2.67    0.79
  -6  15   1    4.69    0.99
   5 -15  -1    0.72    0.51
   5 -15  -1   -0.54    0.80
   5 -15  -1    1.47    0.46
  -5 -15   1    0.10    0.49
   5 -15  -1    1.32    1.10
  -5 -15   1    2.96    1.13
  -5 -15   1    0.76    0.55
   5 -15  -1   -0.18    0.42
  -5  15   1    0.21    0.63
  -5  15   1    0.76    0.87
  -5  15   1    1.16    0.85
  -4 -15   1    0.23    0.61
  -4 -15   1    1.94    1.00
   4 -15  -1    0.52    0.77
   4 -15  -1    0.45    0.32
  -4 -15   1    0.22    0.33
   4 -15  -1    0.39    0.58
   4 -15  -1    0.29    0.73
  -4 -15   1    0.89    0.63
   4 -15  -1    0.57    0.42
  -4  15   1    0.50    0.50
  -4  15   1    1.47    0.46
  -4  15   1    0.47    0.79
   4  15  -1    0.59    0.37
   4  15  -1    1.18    0.63
  -3 -15   1    0.57    0.20
  -3 -15   1    0.40    0.54
   3 -15  -1   -0.21    0.70
  -3 -15   1    0.23    0.56
   3 -15  -1    0.57    0.57
  -3 -15   1   -0.16    0.28
  -3 -15   1    0.28    0.43
   3 -15  -1    0.36    0.53
   3 -15  -1    0.25    0.31
   3 -15  -1   -0.27    0.26
   3 -15  -1    0.66    0.28
   3  15  -1    0.19    0.28
  -3  15   1   -0.22    0.43
   3  15  -1    0.04    0.53
  -3  15   1    0.39    0.43
   3  15  -1    0.19    0.15
  -3  15   1   -0.57    0.50
  -3  15   1   -0.10    0.51
   2 -15  -1   -0.30    0.37
   2 -15  -1    0.18    0.28
  -2 -15   1    0.05    0.21
  -2 -15   1    0.06    0.58
   2 -15  -1    0.53    0.52
  -2 -15   1   -0.28    0.19
  -2 -15   1   -0.30    0.48
   2 -15  -1    0.28    0.58
  -2 -15   1    0.51    0.59
   2 -15  -1    0.22    0.25
   2 -15  -1    0.09    0.28
   2  15  -1   -0.38    0.48
  -2  15   1   -0.30    0.29
  -2  15   1    0.16    0.49
   2  15  -1    0.24    0.27
   2  15  -1    0.25    0.18
   2  15  -1   -0.15    0.67
  -2  15   1   -0.52    0.78
   2  15  -1   -0.53    0.28
  -2  15   1   -0.18    0.36
   1 -15  -1   -0.13    0.33
   1 -15  -1    0.09    0.52
  -1 -15   1    0.12    0.39
   1 -15  -1    0.23    0.42
   1 -15  -1    0.31    0.21
   1 -15  -1   -0.14    0.51
  -1 -15   1    0.07    0.27
  -1 -15   1    0.38    0.16
   1 -15  -1    0.73    0.28
  -1 -15   1    0.84    0.64
  -1 -15   1    0.02    0.33
   1  15  -1    0.32    0.32
  -1  15   1    0.62    0.52
  -1  15   1   -0.30    0.41
   1  15  -1    0.30    0.18
   1  15  -1    1.40    0.64
   1  15  -1    0.30    0.29
  -1  15   1    0.45    0.30
  -1  15   1   -0.06    0.36
   0 -15   1    3.83    0.29
   0 -15  -1    4.68    0.57
   0 -15  -1    4.41    0.79
   0 -15   1    3.69    0.50
   0 -15  -1    5.32    0.53
   0 -15   1    3.98    0.70
   0 -15   1    4.59    0.58
   0 -15  -1    4.77    0.48
   0 -15  -1    4.12    0.63
   0 -15   1    4.30    0.71
   0  15  -1    4.04    0.53
   0  15  -1    3.08    0.49
   0  15   1    3.35    0.67
   0  15   1    4.54    0.47
   0  15  -1    4.66    0.90
   0  15   1    4.10    0.76
   0  15  -1    3.98    0.50
   0  15   1    3.98    0.52
  -1 -15  -1    7.69    0.69
   1 -15   1    8.76    0.83
  -1 -15  -1    6.10    0.91
  -1 -15  -1    8.33    0.61
   1 -15   1    8.67    0.85
   1 -15   1    8.11    0.74
  -1 -15  -1    7.39    0.85
   1 -15   1    7.60    0.70
  -1 -15  -1    7.73    0.82
   1  15   1    6.74    0.69
  -1  15  -1    9.13    0.72
   1  15   1    6.04    0.65
  -1  15  -1    7.03    0.87
   1  15   1    8.69    0.88
   1  15   1    5.86    0.68
  -1  15  -1    7.28    0.99
  -1  15  -1    7.52    0.68
   2 -15   1   -0.70    0.50
  -2 -15  -1    0.53    0.46
  -2 -15  -1   -0.09    0.27
  -2 -15  -1    0.47    0.41
  -2 -15  -1    0.04    0.31
   2 -15   1   -0.12    0.59
   2 -15   1   -0.06    0.31
   2 -15   1    0.37    0.43
  -2 -15  -1    0.28    0.58
   2  15   1    0.17    0.50
   2  15   1   -0.23    0.32
   2  15   1   -0.48    0.36
   2  15   1    0.99    0.58
   2  15   1    0.60    0.35
  -2  15  -1   -0.55    0.42
  -2  15  -1    0.30    0.54
  -2  15  -1   -0.04    0.39
  -2  15  -1    0.10    0.41
   3 -15   1    0.03    0.51
   3 -15   1   -0.47    0.63
  -3 -15  -1    0.66    0.70
   3 -15   1   -0.24    0.26
  -3 -15  -1   -0.21    0.52
   3 -15   1    0.10    0.12
   3 -15   1   -0.47    0.32
  -3 -15  -1    0.08    0.37
  -3 -15  -1   -0.14    0.24
  -3 -15  -1   -0.57    0.43
  -3  15  -1    0.84    0.40
   3  15   1    0.24    0.45
   3  15   1    0.57    0.59
  -3  15  -1    0.84    0.80
  -3  15  -1   -0.27    0.30
   3  15   1   -0.16    0.63
  -4 -15  -1    0.07    0.45
  -4 -15  -1    0.46    0.45
   4 -15   1    0.95    0.76
   4 -15   1    0.92    0.53
   4 -15   1    0.21    0.22
  -4 -15  -1    1.03    0.55
   4 -15   1   -0.55    0.47
  -4 -15  -1    0.35    0.51
  -4 -15  -1    0.18    0.21
   4 -15   1    0.76    0.23
   4  15   1   -0.50    0.57
   4  15   1    1.00    0.71
  -4  15  -1   -0.23    0.93
  -4  15  -1    1.04    0.51
  -4  15  -1   -0.27    0.38
  -4  15  -1   -0.53    0.50
   4  15   1    0.68    0.46
   5 -15   1    0.17    0.50
  -5 -15  -1    0.26    0.43
   5 -15   1    2.84    1.81
  -5 -15  -1   -0.13    0.86
  -5 -15  -1    1.11    1.14
   5 -15   1    0.27    0.78
   5  15   1   -0.98    1.02
  -5  15  -1    0.44    0.45
  -5  15  -1    1.67    0.86
  -5  15  -1   -1.01    0.74
  -6 -15  -1    0.10    0.75
   6 -15   1    1.50    0.67
   6 -15   1   -0.41    1.02
  -6 -15  -1   -0.33    0.74
  -5 -16   1    0.67    0.60
   5 -16  -1   -0.23    1.17
  -5 -16   1    0.31    0.72
   5 -16  -1    1.49    0.93
  -5 -16   1    2.43    1.33
   5 -16  -1    1.14    0.52
   5 -16  -1   -0.81    0.89
  -5  16   1    2.20    0.69
  -5  16   1    0.49    0.61
   4 -16  -1    2.86    0.62
  -4 -16   1    3.37    0.69
  -4 -16   1    3.24    1.39
   4 -16  -1    3.78    0.67
   4 -16  -1    3.12    0.97
   4 -16  -1    5.07    0.98
  -4  16   1    3.91    1.02
   4  16  -1    3.46    0.60
  -4  16   1    3.71    0.80
  -4  16   1    2.87    0.70
   3 -16  -1    1.35    0.49
   3 -16  -1   -0.17    0.43
   3 -16  -1    0.71    0.37
   3 -16  -1    0.87    0.66
  -3 -16   1    0.26    0.61
   3 -16  -1    0.73    0.37
  -3 -16   1    0.88    0.32
  -3 -16   1    0.38    0.42
  -3 -16   1    1.09    0.26
   3  16  -1    0.56    0.19
  -3  16   1    0.84    0.66
  -3  16   1    1.23    0.47
   3  16  -1    0.85    0.48
  -3  16   1    0.47    0.57
  -2 -16   1    0.24    0.27
  -2 -16   1    0.61    0.54
   2 -16  -1    0.69    0.28
  -2 -16   1   -0.57    0.36
  -2 -16   1   -0.09    0.22
   2 -16  -1   -0.33    0.63
  -2 -16   1    0.06    0.58
   2 -16  -1   -0.27    0.65
   2 -16  -1    0.46    0.26
   2 -16  -1    1.95    0.76
  -2  16   1   -0.84    0.99
  -2  16   1    0.15    0.47
  -2  16   1    0.88    0.61
  -2  16   1   -0.14    0.31
   2  16  -1    0.25    0.37
   2  16  -1    0.30    0.21
   2  16  -1   -0.44    0.27
   1 -16  -1    0.10    0.42
  -1 -16   1    0.03    0.16
   1 -16  -1    0.15    0.24
   1 -16  -1   -0.63    0.44
   1 -16  -1   -0.07    0.63
  -1 -16   1   -0.13    0.47
   1 -16  -1    0.34    0.29
  -1 -16   1   -0.22    0.30
  -1 -16   1   -0.11    0.40
   1 -16  -1    1.25    0.48
  -1 -16   1    1.04    0.75
  -1  16   1   -0.18    0.58
  -1  16   1   -0.15    0.53
   1  16  -1    0.12    0.32
  -1  16   1    0.08    0.34
   1  16  -1    0.18    0.33
   1  16  -1   -0.01    0.58
   0 -16   1    3.99    0.69
   0 -16  -1    3.73    0.62
   0 -16   1    4.63    0.67
   0 -16  -1    4.34    0.78
   0 -16   1    3.75    0.28
   0 -16   1    3.68    0.41
   0 -16  -1    5.51    0.75
   0 -16  -1    4.86    0.47
   0 -16  -1    4.49    0.88
   0  16   1    4.48    0.70
   0  16   1    5.22    0.51
   0  16  -1    4.56    0.53
   0  16  -1    3.58    0.77
   0  16   1    3.48    0.67
   0  16  -1    4.57    0.80
   0  16   1    4.90    0.59
   0  16  -1    2.76    0.61
   1 -16   1   13.13    1.02
   1 -16   1   12.23    0.97
  -1 -16  -1   12.52    1.07
  -1 -16  -1   14.66    0.90
   1 -16   1   13.73    1.07
  -1 -16  -1   12.08    0.98
  -1 -16  -1   13.79    0.95
   1 -16   1   12.95    1.44
  -1 -16  -1   13.94    1.18
   1  16   1   12.74    1.01
  -1  16  -1   12.64    1.16
   1  16   1   13.31    1.22
   1  16   1   15.79    1.21
  -1  16  -1   13.57    1.06
  -1  16  -1   11.96    1.06
  -1  16  -1   11.49    1.08
  -2 -16  -1    1.56    0.34
  -2 -16  -1    2.81    0.63
  -2 -16  -1    1.93    0.36
   2 -16   1    2.89    0.63
   2 -16   1    1.84    0.66
  -2 -16  -1    2.42    0.37
   2  16   1    1.25    0.59
   2  16   1    2.15    0.48
  -2  16  -1    1.21    0.67
   2  16   1    1.33    0.93
  -2  16  -1    2.50    0.58
   2  16   1    1.16    0.47
  -2  16  -1    2.12    0.65
   2  16   1    2.14    0.45
  -2  16  -1    3.25    0.69
  -3 -16  -1   -0.21    0.29
  -3 -16  -1    0.97    0.84
  -3 -16  -1   -0.02    0.69
  -3 -16  -1    0.49    0.42
   3 -16   1    0.02    0.72
   3 -16   1    0.43    0.71
  -3  16  -1   -0.11    0.41
  -3  16  -1   -0.38    0.88
  -3  16  -1   -0.15    0.56
  -3  16  -1   -0.86    0.51
   3  16   1    0.56    0.49
   3  16   1    0.08    0.59
   4 -16   1    0.17    0.44
  -4 -16  -1   -0.11    0.57
  -4 -16  -1    1.05    0.89
  -4 -16  -1    0.25    0.59
  -4 -16  -1   -0.05    0.35
   4 -16   1   -1.24    0.71
   4 -16   1   -0.34    0.19
   4  16   1    0.03    0.46
  -4  16  -1   -0.69    0.63
  -4  16  -1    1.11    0.84
   4  16   1    0.57    0.66
   4  16   1   -0.88    0.74
  -5 -16  -1   -0.60    1.24
   5 -16   1   -1.23    0.85
  -5 -16  -1    0.49    0.47
  -5 -16  -1   -0.79    0.97
  -5  16  -1    0.48    0.62
   5  16   1   -1.82    1.19
   5 -17  -1    1.65    0.85
  -5 -17   1    1.43    0.92
  -5 -17   1    2.38    1.51
   5 -17  -1    1.00    1.15
  -5 -17   1    3.01    0.73
  -5  17   1    1.67    0.82
  -5  17   1    1.89    0.69
  -4 -17   1    0.75    0.54
   4 -17  -1   -0.30    0.99
   4 -17  -1   -0.04    0.40
  -4 -17   1   -0.21    0.54
  -4 -17   1    2.99    1.14
   4 -17  -1    0.28    0.87
   4 -17  -1    0.68    0.77
  -4  17   1   -0.13    0.73
  -4  17   1    0.55    0.80
  -4  17   1    0.25    1.30
   4  17  -1    1.01    0.55
   3 -17  -1    0.45    0.28
  -3 -17   1   -0.07    0.31
  -3 -17   1   -0.98    0.59
  -3 -17   1   -0.62    0.67
   3 -17  -1    1.11    0.72
   3 -17  -1   -0.01    0.84
   3 -17  -1    0.19    0.37
  -3 -17   1    0.64    0.56
   3 -17  -1   -0.87    0.68
  -3 -17   1   -0.12    0.32
  -3  17   1    0.41    0.63
   3  17  -1    0.15    0.20
  -3  17   1    0.30    0.50
   3  17  -1   -0.20    0.38
  -3  17   1    0.23    0.51
  -2 -17   1   -0.27    0.23
   2 -17  -1    0.45    0.79
   2 -17  -1   -0.15    0.48
   2 -17  -1   -0.21    0.54
   2 -17  -1   -0.20    0.25
  -2 -17   1    0.23    0.60
  -2 -17   1    1.03    0.52
  -2 -17   1   -0.03    0.36
  -2 -17   1    0.41    0.66
   2  17  -1    0.19    0.29
   2  17  -1   -0.63    0.42
  -2  17   1    0.06    0.74
  -2  17   1    0.26    0.53
  -2  17   1   -0.18    0.60
   2  17  -1   -0.10    0.67
   2  17  -1   -0.05    0.25
   1 -17  -1    0.37    0.31
  -1 -17   1   -0.09    0.32
  -1 -17   1    1.65    0.63
  -1 -17   1    0.11    0.73
  -1 -17   1    0.21    0.62
   1 -17  -1   -0.04    0.74
   1 -17  -1    0.49    0.45
  -1 -17   1    0.04    0.17
   1 -17  -1    0.20    0.27
   1  17  -1    0.56    0.42
   1  17  -1   -0.46    0.56
   1  17  -1   -0.03    0.29
  -1  17   1   -0.17    0.34
  -1  17   1   -0.40    0.30
  -1  17   1   -0.46    0.42
   0 -17   1    0.83    0.49
   0 -17  -1    0.39    0.25
   0 -17  -1    0.80    0.69
   0 -17  -1    0.43    0.43
   0 -17   1   -0.32    0.50
   0 -17   1   -0.16    0.38
   0 -17   1    1.10    0.42
   0 -17  -1    1.21    0.59
   0 -17  -1    1.80    0.75
   0  17  -1    0.18    0.59
   0  17   1    0.73    0.50
   0  17  -1    0.37    0.37
   0  17   1    0.89    0.72
   0  17  -1    0.17    0.64
  -1 -17  -1   17.85    1.44
  -1 -17  -1   17.76    1.08
   1 -17   1   16.93    1.36
  -1 -17  -1   16.64    1.57
   1 -17   1   17.47    1.38
  -1 -17  -1   16.88    1.22
   1 -17   1   16.74    1.31
  -1 -17  -1   15.45    1.16
   1 -17   1   14.92    1.08
   1  17   1   13.70    1.17
  -1  17  -1   16.08    1.21
  -1  17  -1   15.72    1.28
  -1  17  -1   14.56    1.15
   1  17   1   13.60    1.32
   2 -17   1    6.68    1.15
  -2 -17  -1    6.37    1.24
   2 -17   1    9.88    1.07
  -2 -17  -1    9.19    0.67
   2 -17   1    8.57    0.95
  -2 -17  -1    9.94    1.08
  -2 -17  -1    7.68    0.75
   2 -17   1    8.48    0.95
  -2 -17  -1   10.62    1.59
  -2  17  -1    8.62    0.87
   2  17   1    5.54    1.10
   2  17   1    8.02    1.09
   2  17   1    8.33    0.86
  -2  17  -1    5.57    1.15
  -2  17  -1    7.59    1.07
  -3 -17  -1    2.12    0.53
   3 -17   1    2.67    0.91
  -3 -17  -1    1.92    0.82
   3 -17   1    3.84    0.78
  -3 -17  -1    2.22    1.04
   3 -17   1    2.72    0.87
  -3  17  -1    2.90    0.54
  -3  17  -1    2.79    0.70
   3  17   1    2.27    0.69
  -3  17  -1    3.44    0.63
  -4 -17  -1    0.62    0.64
   4 -17   1    0.38    0.86
  -4 -17  -1   -0.85    0.59
   4 -17   1    0.34    0.58
  -4 -17  -1   -0.57    0.40
   4  17   1   -1.41    1.28
   4  17   1   -0.53    0.58
  -4  17  -1    0.62    0.62
  -4  17  -1   -0.10    0.41
  -4  17  -1   -1.02    0.64
  -5 -17  -1   -1.22    1.15
   5 -17   1    1.40    0.58
  -5 -17  -1    0.70    1.33
  -5 -17  -1    0.17    0.50
  -4 -18   1    2.94    1.23
  -4 -18   1    0.55    0.62
   4 -18  -1    0.71    0.97
  -4 -18   1    0.85    0.87
  -4  18   1   -0.11    0.66
  -4  18   1    0.43    0.96
   3 -18  -1    0.67    0.76
  -3 -18   1   -0.63    0.70
  -3 -18   1    1.42    0.64
   3 -18  -1    0.62    0.37
   3 -18  -1    1.11    1.02
  -3 -18   1    0.97    0.40
  -3  18   1    0.92    0.74
  -3  18   1    0.07    0.83
  -3  18   1    0.14    0.68
  -2 -18   1    1.07    0.67
  -2 -18   1    0.07    0.27
   2 -18  -1    1.14    0.72
   2 -18  -1    0.33    0.38
   2 -18  -1   -0.18    0.69
   2 -18  -1    0.58    0.76
  -2 -18   1    0.29    0.65
  -2 -18   1   -0.28    0.46
   2  18  -1    0.26    0.32
   2  18  -1    0.18    0.32
  -2  18   1   -0.02    0.73
   2  18  -1   -0.31    0.58
  -2  18   1    0.60    0.90
  -2  18   1    0.63    0.40
   1 -18  -1    0.48    0.88
  -1 -18   1    0.56    0.33
  -1 -18   1    0.49    0.53
   1 -18  -1    0.92    0.40
  -1 -18   1    0.38    0.56
   1 -18  -1    1.95    0.77
   1 -18  -1   -0.10    0.67
   1 -18  -1   -0.17    0.33
  -1 -18   1    0.23    0.20
  -1 -18   1   -0.75    0.53
   1 -18  -1    0.45    0.41
   1  18  -1    0.11    0.36
  -1  18   1    0.37    0.42
   1  18  -1    0.31    0.64
  -1  18   1   -0.20    0.52
   0 -18  -1    1.15    0.80
   0 -18   1    1.75    0.58
   0 -18  -1    1.62    0.48
   0 -18  -1    1.09    0.33
   0 -18  -1    0.75    0.28
   0 -18   1    0.72    0.49
   0 -18  -1    0.68    0.61
   0 -18   1    1.33    0.63
   0 -18   1    0.75    0.49
   0  18  -1    0.74    0.37
   0  18   1    1.27    0.38
   0  18   1    1.38    0.74
   0  18  -1   -0.53    0.66
   0  18   1    0.36    0.75
  -1 -18  -1    0.05    0.33
  -1 -18  -1    0.90    0.60
   1 -18   1    1.39    0.86
  -1 -18  -1    0.96    0.55
   1 -18   1    1.57    0.58
  -1 -18  -1    0.57    0.40
   1 -18   1    0.68    0.80
  -1  18  -1    0.32    0.41
   1  18   1    0.44    0.49
  -1  18  -1   -0.67    0.66
   1  18   1    0.82    0.40
  -2 -18  -1    0.32    0.28
   2 -18   1   -1.09    0.88
  -2 -18  -1   -0.84    0.86
   2 -18   1    0.40    0.78
  -2 -18  -1    0.55    0.65
  -2 -18  -1   -0.01    0.36
   2 -18   1    1.04    0.78
  -2 -18  -1    1.72    0.98
   2  18   1    0.50    0.47
   2  18   1    0.07    0.49
   2  18   1    0.45    0.45
  -2  18  -1    0.08    0.58
   2  18   1    0.65    0.77
  -2  18  -1   -0.29    0.37
   3 -18   1    1.13    0.81
  -3 -18  -1    2.32    1.06
  -3 -18  -1   -0.49    0.77
  -3 -18  -1    0.36    0.48
  -3  18  -1   -0.27    0.62
   3  18   1    0.24    0.53
  -3  18  -1    0.51    0.79
  -3  18  -1   -0.87    0.81
  -4 -18  -1   -0.17    0.45
   4 -18   1   -1.11    1.01
  -4 -18  -1    0.25    0.64
  -4  18  -1    0.38    0.59
  -3 -19   1    3.23    0.98
   3 -19  -1   -0.16    0.99
  -3 -19   1    0.25    0.79
  -3  19   1   -0.15    0.70
   2 -19  -1    0.00    0.35
   2 -19  -1    1.01    0.95
  -2 -19   1   -0.12    0.64
   2 -19  -1    0.31    1.05
  -2 -19   1   -0.64    0.67
  -2  19   1   -1.08    1.04
  -2  19   1   -0.40    0.53
  -2  19   1   -0.83    0.80
   2  19  -1    0.94    0.40
   1 -19  -1    0.08    0.83
  -1 -19   1   -0.86    0.45
  -1 -19   1   -0.14    0.45
   1 -19  -1   -1.39    1.00
  -1 -19   1    0.51    0.61
   1 -19  -1    1.13    0.75
   1  19  -1    1.08    0.84
  -1  19   1    1.02    0.86
  -1  19   1   -0.68    0.79
  -1  19   1   -0.29    0.41
   1  19  -1    0.80    0.43
   0 -19  -1    2.24    0.45
   0 -19   1    1.72    0.60
   0 -19   1    0.71    0.82
   0 -19  -1    1.44    0.51
   0 -19  -1    2.35    0.78
   0 -19   1    1.56    0.48
   0 -19  -1    0.92    0.54
   0  19   1    1.41    0.54
   0  19   1    0.74    0.43
   0  19   1    1.99    0.80
   0  19  -1    1.07    0.52
   1 -19   1    1.86    0.72
  -1 -19  -1    0.03    0.33
  -1 -19  -1    1.71    0.57
   1 -19   1    0.74    0.59
  -1 -19  -1    0.07    0.71
  -1 -19  -1    0.58    0.44
   1  19   1   -1.30    0.92
  -1  19  -1    0.06    0.49
   1  19   1    0.14    0.46
   1  19   1    1.44    0.51
  -2 -19  -1    2.60    0.54
   2 -19   1    3.41    0.70
   2 -19   1    2.53    0.60
  -2 -19  -1    4.54    1.25
  -2 -19  -1    4.80    0.81
   2  19   1    2.06    1.02
  -2  19  -1    3.60    0.96
   2  19   1    3.16    0.63
  -2  19  -1    2.91    0.50
   2  19   1    1.20    0.88
   2  19   1    2.66    0.64
  -3 -19  -1    0.52    0.52
   3 -19   1    2.50    1.00
  -3 -19  -1    2.98    1.06
  -3  19  -1    0.12    0.74
  -2 -20   1    0.94    0.65
  -2 -20   1   -0.10    0.97
   2 -20  -1    1.31    0.70
  -2  20   1    0.06    0.76
   1 -20  -1    0.48    1.09
  -1 -20   1    1.39    0.96
  -1  20   1   -0.68    1.43
  -1  20   1   -0.73    0.77
  -1  20   1    0.68    0.46
   0 -20   1    1.43    1.02
   0 -20  -1    1.25    1.03
   0 -20  -1    0.46    0.63
   0 -20  -1    0.93    0.84
   0 -20   1    1.83    0.71
   0  20  -1    0.19    0.55
   0  20   1    0.08    0.92
   0  20   1    0.23    0.47
  -1 -20  -1    2.08    0.84
  -1 -20  -1    1.73    0.41
   1 -20   1    3.92    1.08
  -1 -20  -1    1.39    0.62
  -1  20  -1    1.68    0.73
   1  20   1    2.46    0.85
   1  20   1    2.41    0.60
   1  20   1    2.19    0.66
  -2 -20  -1    0.64    0.75
   2 -20   1   -0.78    1.01
   2 -20   1    1.05    0.98
  -2 -20  -1    0.28    1.06
  -2  20  -1    0.10    0.70
  -1  21   1    1.69    0.54
   1  21  -1    1.40    0.51
   0 -21   1    0.36    2.00
   0 -21   1    0.63    0.76
   0 -21  -1   -0.73    1.10
   0  21   1    1.15    0.64
   0  21  -1    1.10    0.56
   1  21   1    0.71    0.69
   8   0  -2    1.31    0.56
  -8   0   2   -0.26    0.56
  -8   0   2    0.16    0.46
   8   0  -2    0.38    0.64
  -7   0   2    0.23    0.51
   7   0  -2    0.75    0.67
   7   0  -2   -1.34    0.84
   7   0  -2    0.48    0.31
  -7   0   2    0.52    0.31
  -7   0   2    0.45    0.55
   6   0  -2    0.27    0.52
   6   0  -2    0.03    0.69
   6   0  -2   -0.58    0.39
  -6   0   2   -0.92    0.60
   6   0  -2   -0.29    0.40
   5   0  -2    0.32    0.19
   5   0  -2    0.20    0.39
  -5   0   2    0.47    0.26
   5   0  -2    0.04    0.27
  -5   0   2    0.31    0.18
   5   0  -2    0.53    0.35
   5   0  -2    1.16    0.55
   5   0  -2    0.42    0.33
  -5   0   2    0.36    0.30
  -5   0   2    0.22    0.18
  -4   0   2    8.08    0.66
   4   0  -2    8.47    0.63
   4   0  -2    9.41    0.58
   4   0  -2    8.88    0.64
  -4   0   2    7.98    0.62
  -4   0   2    8.72    0.60
   4   0  -2    9.43    0.63
  -4   0   2    8.45    0.63
   4   0  -2    8.87    0.78
  -3   0   2  319.49   18.58
  -3   0   2  308.16   18.61
   3   0  -2  337.16   18.66
  -3   0   2  331.44   18.59
   3   0  -2  364.40   18.64
   3   0  -2  345.34   18.60
   3   0  -2  344.40   18.59
  -3   0   2  300.43   18.59
   3   0  -2  339.32   18.58
  -2   0   2   22.52    1.46
   2   0  -2   24.78    1.47
   2   0  -2   25.01    1.43
   2   0  -2   25.44    1.51
  -2   0   2   24.33    1.45
  -2   0   2   24.68    1.43
  -2   0   2   24.94    1.43
   2   0  -2   26.59    1.44
   2   0  -2   26.02    1.45
  -1   0   2   21.01    1.16
  -1   0   2   19.82    1.20
   1   0  -2   21.78    1.17
   1   0  -2   20.84    1.20
   1   0  -2   21.07    1.23
   1   0  -2   20.09    1.16
  -1   0   2   20.65    1.16
   1   0  -2   19.14    1.20
   0   0   2   27.95    1.57
   0   0  -2   28.63    1.57
   0   0  -2   26.91    1.60
   0   0  -2   27.46    1.60
   0   0  -2   29.56    1.57
   0   0  -2   24.94    1.60
   0   0   2   29.28    1.57
  -1   0  -2   46.85    2.71
  -1   0  -2   49.14    2.70
   1   0   2   45.26    2.71
  -1   0  -2   46.07    2.67
  -1   0  -2   51.55    2.71
   1   0   2   50.32    2.71
  -1   0  -2   44.60    2.71
   2   0   2   15.93    0.99
   2   0   2   16.08    1.00
  -2   0  -2   15.61    0.99
  -2   0  -2   18.57    0.99
   2   0   2   16.65    1.00
  -2   0  -2   15.18    0.98
  -2   0  -2   17.02    1.01
  -3   0  -2    4.01    0.36
   3   0   2    3.08    0.36
   3   0   2    3.70    0.36
   3   0   2    4.20    0.36
  -3   0  -2    4.06    0.43
   3   0   2    3.91    0.42
  -3   0  -2    3.60    0.38
  -4   0  -2   11.04    0.70
   4   0   2    9.85    0.71
   4   0   2    9.25    0.64
  -4   0  -2   10.41    0.71
   4   0   2    8.53    0.61
   4   0   2   10.26    0.73
  -4   0  -2   10.38    0.68
  -4   0  -2    8.79    0.71
   5   0   2    0.07    0.18
   5   0   2   -0.04    0.23
   5   0   2    0.28    0.42
   5   0   2    0.03    0.20
  -5   0  -2    0.43    0.23
  -5   0  -2    0.34    0.17
  -5   0  -2    0.03    0.28
   5   0   2    0.16    0.25
  -5   0  -2    0.23    0.26
  -6   0  -2    0.63    0.35
   6   0   2    0.76    0.33
   6   0   2    0.79    0.36
   6   0   2   -0.15    0.31
  -6   0  -2    0.59    0.53
  -6   0  -2    0.20    0.53
   6   0   2    0.24    0.49
   6   0   2    0.28    0.47
  -6   0  -2   -0.02    0.43
   6   0   2    0.42    0.33
  -7   0  -2    1.38    0.46
   7   0   2    0.53    0.51
   7   0   2    0.10    0.48
   7   0   2    0.58    0.61
  -7   0  -2   -0.18    0.48
  -7   0  -2    0.50    0.42
   7   0   2    0.60    0.69
  -7   0  -2    1.01    0.50
  -8   0  -2    0.95    1.12
   8   0   2   -0.43    1.09
  -8   0  -2    2.76    0.78
   8   0   2    0.87    0.66
  -8   0  -2    1.01    0.50
  -8  -1   2   -0.22    0.67
   8  -1  -2    1.25    1.13
  -8  -1   2    0.70    0.28
   8  -1  -2   -0.01    0.58
  -8  -1   2   -0.29    0.73
  -8   1   2    1.19    0.44
  -8   1   2    0.59    0.71
  -8   1   2    0.67    0.45
   7  -1  -2   -0.65    0.51
   7  -1  -2   -1.13    0.68
   7  -1  -2    1.51    0.71
  -7  -1   2    0.57    0.37
  -7  -1   2    0.52    0.53
   7  -1  -2   -0.21    0.34
  -7  -1   2    0.28    0.28
   7  -1  -2    0.12    0.41
   7   1  -2    0.73    0.91
   7   1  -2    1.02    0.92
  -7   1   2    0.24    0.31
   7   1  -2    1.27    0.43
   7   1  -2    0.63    0.66
  -7   1   2   -0.72    0.48
  -7   1   2    0.23    0.46
  -7   1   2    0.17    0.43
   6  -1  -2    0.39    0.29
  -6  -1   2    1.03    0.33
  -6  -1   2    0.82    0.27
   6  -1  -2    0.78    0.36
   6  -1  -2    0.14    0.74
   6  -1  -2    0.93    0.31
   6  -1  -2    1.21    0.43
   6  -1  -2    0.69    0.69
  -6   1   2    0.08    0.34
   6   1  -2    0.93    0.39
   6   1  -2    0.86    0.31
   6   1  -2    1.31    0.49
   6   1  -2    0.54    0.52
  -6   1   2    0.75    0.31
   6   1  -2    0.56    0.24
   6   1  -2    0.95    0.55
  -6   1   2    0.61    0.41
  -6   1   2    0.31    0.42
  -5  -1   2    1.56    0.25
   5  -1  -2    1.07    0.44
   5  -1  -2    1.31    0.34
   5  -1  -2    1.72    0.32
   5  -1  -2    1.55    0.32
  -5  -1   2    1.54    0.30
   5  -1  -2    1.49    0.23
  -5  -1   2    1.34    0.32
  -5  -1   2    1.22    0.34
   5   1  -2    2.29    0.55
   5   1  -2    1.52    0.23
   5   1  -2    1.71    0.38
  -5   1   2    1.78    0.39
  -5   1   2    1.68    0.30
  -5   1   2    1.75    0.32
   5   1  -2    2.64    0.55
   5   1  -2    1.26    0.30
   4  -1  -2    4.04    0.57
   4  -1  -2    3.72    0.35
  -4  -1   2    3.35    0.37
   4  -1  -2    3.99    0.39
  -4  -1   2    3.19    0.37
  -4  -1   2    3.49    0.31
  -4  -1   2    3.11    0.36
   4  -1  -2    4.03    0.31
   4  -1  -2    3.96    0.41
  -4   1   2    3.71    0.34
   4   1  -2    3.44    0.43
  -4   1   2    3.47    0.36
  -4   1   2    3.54    0.35
   4   1  -2    4.37    0.39
   4   1  -2    3.72    0.35
   4   1  -2    4.09    0.32
   4   1  -2    3.05    0.51
   4   1  -2    3.68    0.58
  -4   1   2    3.83    0.35
   3  -1  -2    5.13    0.44
   3  -1  -2    6.12    0.46
  -3  -1   2    4.81    0.41
  -3  -1   2    5.74    0.47
   3  -1  -2    6.49    0.45
   3  -1  -2    5.46    0.40
  -3   1   2    6.44    0.45
   3   1  -2    5.45    0.39
   3   1  -2    5.79    0.54
  -3   1   2    5.46    0.43
  -3   1   2    5.80    0.46
  -3   1   2    5.92    0.42
   3   1  -2    6.27    0.47
  -2  -1   2   17.35    1.13
   2  -1  -2   20.21    1.13
  -2  -1   2   19.00    1.12
   2  -1  -2   19.09    1.20
   2  -1  -2   19.01    1.11
   2  -1  -2   18.49    1.14
   2  -1  -2   20.16    1.12
  -2  -1   2   19.65    1.11
  -2  -1   2   20.03    1.11
   2   1  -2   19.67    1.11
  -2   1   2   17.13    1.14
  -2   1   2   19.38    1.11
  -2   1   2   19.25    1.14
   2   1  -2   18.61    1.13
   2   1  -2   18.09    1.16
   2   1  -2   19.79    1.11
   2   1  -2   19.35    1.11
   1  -1  -2   16.92    0.98
   1  -1  -2   18.30    0.98
   1  -1  -2   17.38    1.04
   1  -1  -2   16.94    1.01
   1  -1  -2   16.05    1.01
  -1  -1   2   17.52    0.96
  -1   1   2   16.57    1.04
   1   1  -2   17.03    1.00
   1   1  -2   16.05    1.00
  -1   1   2   16.69    1.01
   1   1  -2   15.76    0.96
   1   1  -2   18.77    0.96
   1   1  -2   16.53    1.02
  -1   1   2   16.72    0.98
  -1   1   2   17.88    0.98
   0  -1   2   15.72    0.87
   0  -1  -2   15.68    0.88
   0  -1  -2   16.43    0.88
   0  -1   2   15.39    0.87
   0  -1  -2   15.03    0.91
   0  -1  -2   14.97    0.91
   0  -1  -2   14.59    0.91
   0   1  -2   16.85    0.87
   0   1  -2   15.57    0.87
   0   1   2   13.72    0.90
   0   1  -2   14.89    0.90
   0   1   2   15.24    0.91
   0   1  -2   14.19    0.89
   1  -1   2   34.57    2.03
   1  -1   2   38.00    2.03
  -1  -1  -2   36.58    2.03
   1  -1   2   33.64    2.03
  -1  -1  -2   35.54    2.01
  -1  -1  -2   35.38    2.04
  -1  -1  -2   36.51    2.03
   1   1   2   33.82    2.01
  -1   1  -2   37.13    2.03
  -1   1  -2   37.42    2.03
  -1   1  -2   36.43    2.03
   1   1   2   36.90    2.03
  -1   1  -2   33.70    2.03
  -1   1  -2   34.97    1.99
   1   1   2   32.52    2.03
  -2  -1  -2    5.98    0.44
   2  -1   2    6.23    0.41
   2  -1   2    6.60    0.45
  -2  -1  -2    6.87    0.42
   2  -1   2    5.96    0.45
  -2  -1  -2    5.87    0.44
  -2  -1  -2    5.59    0.36
  -2  -1  -2    5.16    0.40
  -2   1  -2    5.84    0.42
   2   1   2    6.60    0.44
   2   1   2    5.74    0.42
   2   1   2    5.93    0.42
   2   1   2    6.04    0.36
  -2   1  -2    6.01    0.43
  -2   1  -2    5.79    0.44
   3  -1   2  112.84    7.38
   3  -1   2  129.98    7.38
  -3  -1  -2  145.35    7.40
  -3  -1  -2  138.99    7.43
   3  -1   2  142.64    7.43
  -3  -1  -2  128.79    7.38
   3  -1   2  114.32    7.33
  -3  -1  -2  130.43    7.41
   3  -1   2  135.76    7.42
  -3   1  -2  133.92    7.41
  -3   1  -2  126.47    7.47
   3   1   2  116.97    7.34
  -3   1  -2  142.05    7.39
   3   1   2  138.89    7.43
  -3   1  -2  131.01    7.39
   3   1   2  127.64    7.39
   3   1   2  134.14    7.42
  -4  -1  -2    0.73    0.21
  -4  -1  -2    0.90    0.24
   4  -1   2    0.84    0.27
  -4  -1  -2    0.59    0.26
   4  -1   2    0.56    0.19
   4  -1   2    0.75    0.17
   4  -1   2    0.61    0.15
   4  -1   2    0.56    0.23
   4  -1   2    0.75    0.19
  -4   1  -2    0.77    0.21
  -4   1  -2    0.67    0.16
   4   1   2    0.52    0.16
  -4   1  -2    0.38    0.24
   4   1   2    0.61    0.16
   4   1   2    0.98    0.22
   4   1   2    0.87    0.29
   4   1   2    0.78    0.21
   4   1   2    0.57    0.21
  -5  -1  -2    0.01    0.24
   5  -1   2    0.09    0.24
   5  -1   2    0.08    0.22
   5  -1   2   -0.21    0.32
  -5  -1  -2   -0.27    0.22
  -5  -1  -2    0.19    0.25
   5  -1   2   -0.32    0.43
   5  -1   2   -0.18    0.20
  -5   1  -2    0.08    0.34
  -5   1  -2   -0.07    0.20
  -5   1  -2   -0.05    0.27
   5   1   2    0.33    0.26
   5   1   2   -0.16    0.20
   5   1   2   -0.02    0.31
   5   1   2    0.13    0.25
  -5   1  -2    0.34    0.40
   6  -1   2    0.44    0.30
  -6  -1  -2    0.25    0.27
   6  -1   2    0.45    0.33
  -6  -1  -2    0.05    0.39
  -6  -1  -2    0.21    0.34
   6  -1   2    0.16    0.34
   6  -1   2    0.19    0.49
   6  -1   2   -0.13    0.27
  -6  -1  -2    0.00    0.39
   6  -1   2    0.16    0.40
   6   1   2    0.21    0.30
  -6   1  -2    0.25    0.33
   6   1   2   -0.17    0.36
   6   1   2   -0.42    0.27
  -6   1  -2   -0.42    0.40
   6   1   2    0.67    0.27
  -6   1  -2    0.25    0.37
   6   1   2    0.70    0.56
  -6   1  -2   -0.03    0.32
   7  -1   2    1.38    0.91
   7  -1   2    0.75    0.33
  -7  -1  -2    2.35    0.77
   7  -1   2    1.84    0.50
  -7  -1  -2    0.54    0.78
   7  -1   2    1.44    0.50
  -7  -1  -2    1.25    0.40
  -7  -1  -2    1.00    0.55
   7  -1   2    0.77    0.67
   7  -1   2    1.48    0.50
  -7   1  -2    0.87    0.39
   7   1   2    1.39    0.56
   7   1   2    0.81    0.29
  -7   1  -2    0.62    0.62
   7   1   2    0.29    0.59
  -7   1  -2    1.17    0.78
  -7   1  -2    1.70    0.58
   7   1   2    0.20    0.67
  -8  -1  -2    1.21    0.70
   8  -1   2    0.78    1.14
   8  -1   2    0.37    0.94
   8  -1   2   -0.53    0.64
  -8  -1  -2    2.01    0.99
  -8  -1  -2   -0.30    1.11
  -8  -1  -2   -0.54    0.48
   8   1   2   -0.50    1.04
  -8   1  -2   -0.20    0.38
   8   1   2    2.72    1.06
  -8   1  -2   -0.76    0.74
   8   1   2    0.09    0.65
  -8   1  -2    0.65    0.72
  -8  -2   2   -0.82    0.53
   8  -2  -2   -0.49    0.52
  -8  -2   2    0.26    0.27
   8  -2  -2   -0.27    1.02
  -8  -2   2    0.21    0.70
  -8   2   2    0.12    0.61
   8   2  -2    0.32    1.01
  -8   2   2    0.94    0.54
  -8   2   2    0.59    0.59
   7  -2  -2    0.86    0.44
  -7  -2   2   -0.15    0.30
  -7  -2   2   -0.02    0.40
   7  -2  -2    0.15    0.81
   7  -2  -2    0.48    0.89
   7  -2  -2   -0.31    0.60
   7   2  -2    0.35    0.45
  -7   2   2    0.38    0.36
   7   2  -2    0.88    0.55
   7   2  -2    1.67    0.73
  -7   2   2   -0.37    0.33
   7   2  -2    0.42    0.83
  -7   2   2    0.06    0.38
   7   2  -2   -0.11    0.33
   6  -2  -2   -0.07    0.70
   6  -2  -2   -0.04    0.29
  -6  -2   2    0.03    0.39
  -6  -2   2   -0.41    0.44
  -6  -2   2   -0.16    0.16
   6  -2  -2   -0.38    0.44
   6  -2  -2    0.00    0.25
  -6   2   2   -0.28    0.30
   6   2  -2   -0.33    0.47
  -6   2   2   -0.59    0.42
  -6   2   2    0.05    0.25
   6   2  -2    0.14    0.65
   6   2  -2    0.21    0.20
   6   2  -2    0.07    0.29
  -6   2   2   -0.38    0.28
   6   2  -2    0.33    0.35
  -5  -2   2    0.06    0.31
  -5  -2   2   -0.07    0.13
  -5  -2   2   -0.15    0.22
   5  -2  -2    0.03    0.26
  -5  -2   2   -0.22    0.26
   5  -2  -2   -0.15    0.32
   5   2  -2   -0.07    0.31
  -5   2   2   -0.26    0.24
   5   2  -2    0.20    0.26
   5   2  -2   -0.30    0.54
  -5   2   2   -0.20    0.28
   5   2  -2    0.04    0.17
   5   2  -2   -0.38    0.23
   4  -2  -2    4.48    0.49
   4  -2  -2    4.16    0.42
  -4  -2   2    4.61    0.35
   4  -2  -2    4.71    0.42
   4  -2  -2    5.22    0.39
   4  -2  -2    4.36    0.60
  -4  -2   2    4.41    0.38
  -4  -2   2    3.58    0.44
  -4  -2   2    4.14    0.37
  -4   2   2    4.36    0.43
   4   2  -2    3.78    0.54
   4   2  -2    4.69    0.34
   4   2  -2    4.25    0.41
   4   2  -2    4.15    0.38
  -4   2   2    3.82    0.45
  -4   2   2    4.08    0.38
   4   2  -2    5.13    0.46
   3  -2  -2    9.95    0.80
  -3  -2   2    9.80    0.66
   3  -2  -2   11.25    0.68
   3  -2  -2   11.48    0.67
  -3  -2   2    8.37    0.73
   3  -2  -2   10.12    0.68
  -3  -2   2    9.40    0.67
  -3  -2   2   10.25    0.63
   3  -2  -2    9.85    0.66
   3   2  -2   11.59    0.79
   3   2  -2    9.46    0.66
   3   2  -2    9.56    0.66
  -3   2   2   10.13    0.67
   3   2  -2   10.91    0.62
  -3   2   2    9.50    0.65
   3   2  -2   10.87    0.66
  -3   2   2    9.86    0.68
  -3   2   2   10.37    0.67
  -2  -2   2    0.00    0.08
   2  -2  -2    0.15    0.12
   2  -2  -2    0.03    0.13
  -2  -2   2    0.12    0.11
   2  -2  -2   -0.11    0.17
  -2  -2   2    0.01    0.09
   2  -2  -2    0.22    0.08
   2  -2  -2    0.15    0.11
   2   2  -2    0.05    0.08
  -2   2   2    0.22    0.11
   2   2  -2   -0.02    0.10
  -2   2   2    0.22    0.11
   2   2  -2    0.10    0.20
   2   2  -2    0.10    0.07
  -2   2   2   -0.10    0.21
  -2   2   2    0.09    0.11
   2   2  -2    0.09    0.08
   1  -2  -2    5.05    0.40
  -1  -2   2    4.54    0.34
  -1  -2   2    5.47    0.31
   1  -2  -2    5.35    0.38
   1  -2  -2    5.19    0.36
  -1  -2   2    5.10    0.30
   1  -2  -2    5.50    0.33
   1  -2  -2    5.82    0.34
  -1   2   2    4.75    0.41
  -1   2   2    5.70    0.33
  -1   2   2    5.18    0.34
   1   2  -2    5.41    0.31
   1   2  -2    4.89    0.37
   1   2  -2    4.94    0.35
  -1   2   2    4.85    0.38
   1   2  -2    4.73    0.35
   1   2  -2    5.08    0.30
   0  -2  -2    2.46    0.18
   0  -2   2    2.26    0.14
   0  -2  -2    1.97    0.20
   0  -2   2    1.61    0.20
   0  -2  -2    2.09    0.17
   0  -2  -2    1.94    0.19
   0  -2   2    2.16    0.14
   0   2   2    1.65    0.19
   0   2  -2    2.09    0.17
   0   2   2    2.10    0.16
   0   2   2    1.64    0.20
   0   2   2    2.26    0.17
   0   2  -2    1.98    0.14
   0   2  -2    1.97    0.19
   0   2   2    2.04    0.22
   0   2  -2    1.87    0.17
   0   2  -2    2.16    0.14
  -1  -2  -2   14.56    0.82
   1  -2   2   13.68    0.81
   1  -2   2   12.75    0.80
   1  -2   2   11.80    0.82
   1  -2   2   13.18    0.79
  -1  -2  -2   14.75    0.80
  -1  -2  -2   13.34    0.82
  -1  -2  -2   14.06    0.82
   1  -2   2   14.39    0.81
  -1  -2  -2   12.25    0.82
  -1   2  -2   13.13    0.82
   1   2   2   13.57    0.80
   1   2   2   12.67    0.82
   1   2   2   14.25    0.82
  -1   2  -2   14.23    0.79
  -1   2  -2   14.41    0.81
  -1   2  -2   13.80    0.81
  -1   2  -2   14.15    0.80
  -2  -2  -2   -0.18    0.11
   2  -2   2    0.08    0.13
  -2  -2  -2   -0.06    0.11
  -2  -2  -2   -0.06    0.14
  -2  -2  -2   -0.15    0.10
   2  -2   2   -0.07    0.05
   2  -2   2   -0.16    0.14
   2  -2   2    0.01    0.08
  -2  -2  -2   -0.02    0.10
  -2   2  -2   -0.18    0.10
   2   2   2    0.02    0.15
  -2   2  -2    0.15    0.11
   2   2   2    0.10    0.11
  -2   2  -2    0.08    0.13
   2   2   2    0.13    0.08
  -2   2  -2    0.02    0.06
   2   2   2   -0.09    0.16
  -2   2  -2   -0.01    0.15
   3  -2   2   10.34    0.67
   3  -2   2    9.04    0.66
  -3  -2  -2    8.38    0.66
   3  -2   2   10.23    0.71
  -3  -2  -2    9.36    0.65
   3  -2   2    9.78    0.62
  -3  -2  -2    9.34    0.67
  -3   2  -2   10.45    0.66
  -3   2  -2   11.34    0.63
   3   2   2    9.19    0.69
  -3   2  -2    9.47    0.67
   3   2   2    9.64    0.67
   3   2   2   10.07    0.69
   3   2   2    8.65    0.60
  -4  -2  -2    0.84    0.23
  -4  -2  -2    0.88    0.25
   4  -2   2    0.61    0.17
  -4  -2  -2    0.81    0.27
   4  -2   2    0.91    0.29
   4  -2   2    0.48    0.19
   4  -2   2    0.59    0.18
  -4  -2  -2    0.50    0.28
   4  -2   2    0.43    0.23
   4   2   2    0.46    0.15
   4   2   2    0.91    0.23
   4   2   2    0.58    0.21
  -4   2  -2    0.87    0.22
  -4   2  -2    0.94    0.22
  -4   2  -2    0.85    0.17
   4   2   2    0.39    0.32
  -4   2  -2    0.49    0.19
   5  -2   2    0.39    0.20
   5  -2   2    0.31    0.26
  -5  -2  -2    0.21    0.36
   5  -2   2    0.83    0.32
  -5  -2  -2    0.29    0.19
   5  -2   2    0.48    0.25
  -5  -2  -2    0.20    0.38
   5  -2   2    0.36    0.37
  -5  -2  -2    0.18    0.23
   5  -2   2    0.20    0.22
   5   2   2    0.10    0.27
  -5   2  -2    0.07    0.39
   5   2   2    0.08    0.20
   5   2   2   -0.10    0.41
  -5   2  -2    0.34    0.28
   5   2   2    0.61    0.31
  -5   2  -2   -0.10    0.19
  -5   2  -2    0.30    0.39
   6  -2   2    0.12    0.35
   6  -2   2    0.84    0.59
   6  -2   2    0.45    0.31
  -6  -2  -2    0.36    0.28
  -6  -2  -2   -0.20    0.27
   6  -2   2   -0.33    0.30
  -6  -2  -2    0.38    0.31
   6  -2   2    0.21    0.39
  -6  -2  -2   -0.19    0.23
   6   2   2    0.44    0.33
  -6   2  -2   -0.61    0.35
   6   2   2    0.19    0.44
  -6   2  -2   -0.36    0.22
   6   2   2    0.12    0.30
   6   2   2   -0.20    0.31
  -6   2  -2   -0.04    0.39
   6   2   2    0.53    0.37
  -6   2  -2   -0.33    0.31
   7  -2   2   -0.03    0.47
  -7  -2  -2    0.52    0.30
  -7  -2  -2   -0.11    0.39
   7  -2   2    0.50    0.47
   7  -2   2    0.24    0.38
   7  -2   2    0.67    0.53
   7  -2   2    0.31    0.47
  -7  -2  -2    0.92    0.55
   7  -2   2    0.87    0.85
  -7   2  -2    1.43    0.55
   7   2   2    0.73    0.39
  -7   2  -2    1.44    0.73
   7   2   2    1.23    0.83
   7   2   2    0.18    0.51
   7   2   2    0.42    0.58
  -7   2  -2    0.44    0.30
   8  -2   2    1.20    0.97
  -8  -2  -2    0.48    0.63
  -8  -2  -2    0.95    0.57
  -8  -2  -2   -0.30    0.49
   8   2   2    0.22    0.56
  -8   2  -2    0.68    0.65
   8   2   2   -0.35    0.68
  -8   2  -2    0.49    1.13
  -8   2  -2    1.18    1.46
   8  -3  -2    1.33    0.49
  -8  -3   2    1.30    0.50
  -8  -3   2   -0.28    0.57
   8  -3  -2   -0.57    0.60
  -8   3   2   -1.07    0.65
   8   3  -2    2.04    1.12
  -8   3   2    0.15    0.65
  -8   3   2    0.22    0.47
  -7  -3   2    0.17    0.23
  -7  -3   2   -0.54    0.51
   7  -3  -2    0.12    0.87
  -7  -3   2   -0.75    0.48
  -7   3   2    0.42    0.58
  -7   3   2   -0.61    0.56
   7   3  -2    0.99    0.77
  -7   3   2   -0.32    0.52
   7   3  -2   -0.38    0.50
  -7   3   2    0.04    0.38
   7   3  -2    0.68    0.92
   7   3  -2   -0.02    0.24
   6  -3  -2    2.26    0.55
  -6  -3   2    1.89    0.33
   6  -3  -2    1.75    0.33
  -6  -3   2    1.56    0.42
  -6  -3   2    1.88    0.48
  -6  -3   2    1.86    0.47
   6  -3  -2    2.72    0.53
   6  -3  -2    1.42    0.51
   6   3  -2    2.20    0.53
  -6   3   2    1.59    0.48
   6   3  -2    2.76    0.52
   6   3  -2    2.62    0.33
   6   3  -2    2.30    1.31
  -6   3   2    1.43    0.48
   6   3  -2    2.19    0.52
   6   3  -2    2.52    0.77
  -6   3   2    2.08    0.62
  -6   3   2    1.88    0.38
  -5  -3   2    1.35    0.33
   5  -3  -2    1.77    0.57
  -5  -3   2    1.19    0.29
   5  -3  -2    0.64    0.28
   5  -3  -2    1.82    0.40
  -5  -3   2    0.88    0.28
   5  -3  -2    0.94    0.28
   5  -3  -2    1.03    0.38
  -5  -3   2    0.95    0.19
  -5   3   2    1.02    0.36
  -5   3   2    0.77    0.36
   5   3  -2    0.39    0.35
  -5   3   2    1.07    0.30
   5   3  -2    1.32    0.32
   5   3  -2    0.91    0.16
   5   3  -2    1.20    0.35
  -5   3   2    1.02    0.29
   5   3  -2    1.04    0.31
   4  -3  -2    4.13    0.46
  -4  -3   2    3.22    0.30
   4  -3  -2    3.59    0.47
   4  -3  -2    2.83    0.42
   4  -3  -2    4.11    0.58
  -4  -3   2    4.01    0.48
   4  -3  -2    4.57    0.39
  -4  -3   2    3.95    0.37
  -4   3   2    4.00    0.41
   4   3  -2    3.92    0.36
   4   3  -2    3.38    0.39
   4   3  -2    4.09    0.41
  -4   3   2    3.65    0.39
   4   3  -2    3.73    0.27
   4   3  -2    3.39    0.52
  -4   3   2    3.08    0.36
  -3  -3   2    9.57    0.66
   3  -3  -2   10.60    0.70
  -3  -3   2    9.45    0.67
  -3  -3   2    9.64    0.68
   3  -3  -2   10.30    0.68
   3  -3  -2   11.36    0.69
   3  -3  -2    9.87    0.75
  -3  -3   2    9.47    0.62
   3  -3  -2   10.01    0.68
  -3   3   2    9.24    0.65
   3   3  -2    8.86    0.65
  -3   3   2   10.18    0.68
   3   3  -2   10.51    0.61
  -3   3   2   10.98    0.69
   3   3  -2    9.87    0.66
   3   3  -2   11.51    0.68
   3   3  -2   10.83    0.76
  -3   3   2   10.40    0.79
  -2  -3   2    0.07    0.08
   2  -3  -2    0.24    0.15
   2  -3  -2   -0.05    0.13
  -2  -3   2    0.13    0.13
   2  -3  -2    0.25    0.24
   2  -3  -2    0.24    0.13
   2  -3  -2    0.13    0.13
  -2  -3   2    0.18    0.09
   2   3  -2    0.04    0.15
  -2   3   2    0.17    0.11
  -2   3   2    0.16    0.13
   2   3  -2    0.24    0.11
   2   3  -2    0.22    0.14
   2   3  -2    0.18    0.07
   2   3  -2    0.18    0.09
  -2   3   2    0.35    0.13
  -1  -3   2    0.14    0.05
  -1  -3   2    0.13    0.05
  -1  -3   2    0.02    0.08
   1  -3  -2    0.05    0.06
   1  -3  -2    0.44    0.15
   1  -3  -2    0.02    0.08
   1  -3  -2    0.11    0.08
  -1  -3   2    0.02    0.12
   1   3  -2    0.09    0.07
  -1   3   2    0.04    0.13
  -1   3   2    0.14    0.15
  -1   3   2    0.06    0.09
  -1   3   2    0.09    0.09
   1   3  -2    0.13    0.08
   1   3  -2    0.08    0.05
   0  -3   2   22.47    1.47
   0  -3  -2   27.11    1.50
   0  -3  -2   27.15    1.48
   0  -3   2   26.47    1.46
   0  -3  -2   25.06    1.50
   0  -3   2   26.44    1.49
   0  -3  -2   25.74    1.50
   0  -3  -2   26.17    1.48
   0  -3   2   26.70    1.46
   0   3   2   24.67    1.49
   0   3   2   27.05    1.48
   0   3  -2   25.64    1.45
   0   3  -2   26.18    1.46
   0   3   2   25.78    1.50
   0   3  -2   23.33    1.46
   0   3  -2   26.78    1.49
   0   3  -2   25.51    1.48
   0   3   2   22.97    1.49
   1  -3   2   37.26    2.09
  -1  -3  -2   34.25    2.11
  -1  -3  -2   37.81    2.10
  -1  -3  -2   37.60    2.11
   1  -3   2   36.98    2.10
  -1  -3  -2   36.09    2.11
   1  -3   2   37.00    2.08
  -1  -3  -2   35.26    2.11
   1  -3   2   32.69    2.10
   1  -3   2   33.76    2.08
  -1   3  -2   39.19    2.08
   1   3   2   34.88    2.12
  -1   3  -2   37.94    2.10
   1   3   2   36.52    2.10
  -1   3  -2   38.41    2.10
   1   3   2   39.77    2.12
  -1   3  -2   37.56    2.10
  -1   3  -2   37.02    2.08
   2  -3   2    3.16    0.28
  -2  -3  -2    2.94    0.25
   2  -3   2    2.75    0.27
  -2  -3  -2    3.43    0.25
   2  -3   2    3.02    0.35
   2  -3   2    3.32    0.25
  -2  -3  -2    3.18    0.30
  -2   3  -2    3.55    0.30
   2   3   2    2.93    0.28
  -2   3  -2    2.96    0.28
   2   3   2    3.15    0.31
   2   3   2    2.98    0.31
  -2   3  -2    2.88    0.23
  -2   3  -2    2.90    0.31
   2   3   2    3.18    0.25
   3  -3   2   76.88    4.39
  -3  -3  -2   74.43    4.39
  -3  -3  -2   77.17    4.44
  -3  -3  -2   73.59    4.40
  -3  -3  -2   86.31    4.43
   3  -3   2   81.06    4.44
   3  -3   2   74.78    4.37
   3  -3   2   69.69    4.41
   3  -3   2   79.11    4.45
  -3  -3  -2   79.93    4.45
   3   3   2   79.02    4.45
   3   3   2   71.50    4.38
   3   3   2   77.73    4.44
  -3   3  -2   83.50    4.39
   3   3   2   73.99    4.42
  -3   3  -2   83.34    4.42
  -3   3  -2   78.05    4.43
  -4  -3  -2    0.63    0.22
   4  -3   2    0.47    0.18
   4  -3   2    0.81    0.26
   4  -3   2    0.61    0.31
  -4  -3  -2    0.31    0.18
   4  -3   2    0.62    0.17
   4  -3   2    0.45    0.30
  -4  -3  -2    0.17    0.33
  -4  -3  -2    0.34    0.29
   4   3   2    0.39    0.17
  -4   3  -2    0.75    0.18
   4   3   2    0.44    0.35
   4   3   2    0.60    0.24
  -4   3  -2    0.70    0.20
  -4   3  -2    0.63    0.24
  -4   3  -2    0.61    0.18
   4   3   2    0.52    0.22
   5  -3   2    0.05    0.19
  -5  -3  -2   -0.32    0.41
   5  -3   2    0.07    0.23
   5  -3   2   -0.04    0.23
  -5  -3  -2    0.18    0.25
  -5  -3  -2   -0.17    0.38
   5  -3   2   -0.12    0.22
   5  -3   2    0.21    0.45
  -5  -3  -2   -0.12    0.23
   5  -3   2   -0.18    0.19
  -5   3  -2   -0.03    0.28
  -5   3  -2   -0.40    0.52
  -5   3  -2   -0.31    0.19
   5   3   2   -0.05    0.21
  -5   3  -2    0.35    0.36
   5   3   2    0.02    0.32
   5   3   2    0.09    0.29
   5   3   2    0.19    0.36
  -6  -3  -2    1.05    0.37
  -6  -3  -2    0.51    0.65
  -6  -3  -2    1.04    0.61
   6  -3   2    1.20    0.34
   6  -3   2    1.00    0.37
  -6  -3  -2    0.95    0.34
   6  -3   2    0.45    0.31
   6  -3   2    1.69    0.53
   6  -3   2    0.94    0.42
   6  -3   2    1.03    0.42
   6   3   2    1.33    0.43
   6   3   2    0.12    0.49
   6   3   2    0.95    0.27
   6   3   2    1.00    0.46
  -6   3  -2    0.07    0.53
  -6   3  -2    1.08    0.30
  -6   3  -2    1.36    0.60
  -6   3  -2    0.61    0.33
   7  -3   2    2.67    0.52
   7  -3   2    3.09    0.68
   7  -3   2    2.35    0.40
  -7  -3  -2    2.12    0.48
   7  -3   2    2.57    0.93
  -7  -3  -2    2.23    0.85
  -7  -3  -2    1.73    0.57
   7  -3   2    1.95    0.53
  -7  -3  -2    1.81    0.38
  -7   3  -2    1.63    0.77
  -7   3  -2    3.19    0.67
   7   3   2    2.56    0.82
  -7   3  -2    3.34    0.77
   7   3   2    2.33    0.42
  -7   3  -2    2.50    0.58
   8  -3   2    0.67    0.73
  -8  -3  -2   -0.43    1.02
  -8  -3  -2   -0.84    0.50
  -8  -3  -2   -0.19    0.52
   8   3   2   -0.54    0.71
  -8   3  -2   -0.56    0.51
   8   3   2   -1.89    1.62
  -8   3  -2    0.26    0.93
  -8   3  -2    0.51    0.51
   8   3   2    0.31    1.11
  -8   3  -2    0.89    0.92
   8  -4  -2   -0.07    0.67
   8  -4  -2    1.24    1.16
  -8  -4   2   -0.83    0.73
   8   4  -2    2.41    1.12
  -8   4   2    0.53    0.75
   7  -4  -2    0.36    0.69
  -7  -4   2    0.99    0.44
  -7  -4   2    0.36    0.20
   7  -4  -2    0.91    0.64
  -7  -4   2    0.22    0.50
   7  -4  -2   -0.46    0.41
   7  -4  -2   -0.06    0.75
   7   4  -2    0.50    0.21
   7   4  -2    0.89    0.58
  -7   4   2   -0.08    0.55
   7   4  -2    2.00    0.87
  -7   4   2    0.61    0.65
  -7   4   2   -0.27    0.53
  -6  -4   2    3.81    0.35
  -6  -4   2    4.33    0.61
   6  -4  -2    3.82    0.72
   6  -4  -2    3.56    0.70
   6  -4  -2    4.79    0.70
   6  -4  -2    5.61    1.26
  -6  -4   2    3.01    0.49
  -6  -4   2    3.64    0.45
   6  -4  -2    4.64    0.56
  -6   4   2    2.98    0.47
   6   4  -2    3.46    0.33
  -6   4   2    3.60    0.65
  -6   4   2    4.06    0.58
   6   4  -2    3.39    0.57
   6   4  -2    3.06    0.62
   6   4  -2    4.70    0.62
  -5  -4   2   13.86    0.99
  -5  -4   2   14.29    1.01
   5  -4  -2   14.80    1.10
   5  -4  -2   15.63    1.20
  -5  -4   2   13.40    0.88
   5  -4  -2   15.40    1.01
   5  -4  -2   15.95    1.00
   5  -4  -2   13.63    1.05
  -5  -4   2   15.13    0.99
  -5   4   2   14.79    1.05
  -5   4   2   14.37    1.04
  -5   4   2   14.90    1.01
   5   4  -2   14.65    1.01
   5   4  -2   14.42    0.86
   5   4  -2   15.65    1.01
   5   4  -2   15.71    1.00
   5   4  -2   14.99    1.15
  -5   4   2   12.54    0.99
   4  -4  -2   18.48    1.16
   4  -4  -2   18.99    1.30
  -4  -4   2   17.11    1.16
  -4  -4   2   18.37    1.17
   4  -4  -2   19.96    1.18
   4  -4  -2   18.82    1.22
   4   4  -2   21.16    1.17
   4   4  -2   18.98    1.07
  -4   4   2   17.13    1.23
   4   4  -2   18.10    1.17
  -4   4   2   18.15    1.17
   4   4  -2   19.51    1.18
   4   4  -2   19.15    1.27
  -4   4   2   16.93    1.19
  -4   4   2   17.83    1.17
  -3  -4   2   45.03    2.57
   3  -4  -2   48.59    2.59
  -3  -4   2   46.88    2.61
   3  -4  -2   44.08    2.65
   3  -4  -2   48.77    2.61
   3  -4  -2   44.32    2.60
  -3  -4   2   41.50    2.58
   3  -4  -2   42.93    2.59
  -3   4   2   43.63    2.59
  -3   4   2   39.72    2.59
  -3   4   2   44.33    2.59
  -3   4   2   42.67    2.66
   3   4  -2   45.58    2.63
   3   4  -2   50.02    2.59
   3   4  -2   43.81    2.52
   3   4  -2   43.10    2.57
   3   4  -2   45.61    2.58
  -2  -4   2    0.62    0.13
   2  -4  -2    0.99    0.19
  -2  -4   2    0.79    0.15
   2  -4  -2    0.66    0.17
  -2  -4   2    0.70    0.14
   2  -4  -2    0.79    0.17
   2  -4  -2    0.75    0.13
   2  -4  -2    0.92    0.24
  -2  -4   2    0.63    0.26
   2   4  -2    0.99    0.18
  -2   4   2    1.09    0.28
  -2   4   2    0.73    0.16
   2   4  -2    0.67    0.26
   2   4  -2    0.67    0.11
   2   4  -2    0.81    0.13
  -2   4   2    0.76    0.19
   2   4  -2    0.71    0.12
   2   4  -2    0.61    0.10
   1  -4  -2    0.12    0.20
  -1  -4   2    0.11    0.07
  -1  -4   2    0.05    0.06
  -1  -4   2    0.01    0.17
   1  -4  -2    0.12    0.09
   1  -4  -2    0.12    0.14
   1  -4  -2   -0.01    0.07
  -1  -4   2   -0.03    0.08
  -1   4   2   -0.02    0.11
   1   4  -2    0.04    0.16
  -1   4   2    0.26    0.10
  -1   4   2    0.03    0.06
  -1   4   2    0.11    0.19
   1   4  -2   -0.01    0.07
   1   4  -2    0.17    0.07
   1   4  -2    0.02    0.05
   1   4  -2    0.02    0.07
   0  -4   2   28.96    1.85
   0  -4  -2   34.64    1.87
   0  -4   2   30.27    1.86
   0  -4   2   32.85    1.87
   0  -4  -2   34.18    1.88
   0  -4   2   33.39    1.84
   0  -4  -2   34.10    1.87
   0  -4  -2   32.41    1.88
   0  -4  -2   30.99    1.88
   0   4   2   34.29    1.87
   0   4   2   31.57    1.88
   0   4   2   32.48    1.89
   0   4  -2   32.69    1.84
   0   4   2   29.63    1.88
   0   4  -2   33.66    1.85
   0   4  -2   29.66    1.83
   0   4  -2   34.44    1.87
   0   4  -2   32.33    1.84
   1  -4   2   82.72    5.32
  -1  -4  -2   97.30    5.37
  -1  -4  -2   96.91    5.36
  -1  -4  -2   92.69    5.36
  -1  -4  -2   93.29    5.37
   1  -4   2   86.75    5.35
  -1  -4  -2  102.57    5.37
   1  -4   2   89.82    5.35
   1  -4   2   93.81    5.34
   1  -4   2   99.67    5.35
  -1   4  -2  102.25    5.36
   1   4   2   95.67    5.36
   1   4   2   88.00    5.37
  -1   4  -2  103.98    5.36
   1   4   2   98.18    5.37
   1   4   2   98.23    5.36
  -1   4  -2   98.07    5.35
   1   4   2   89.00    5.36
  -1   4  -2   93.64    5.34
  -1   4  -2   97.62    5.32
  -2  -4  -2    1.36    0.21
  -2  -4  -2    1.07    0.23
   2  -4   2    1.35    0.25
  -2  -4  -2    1.21    0.23
  -2  -4  -2    0.86    0.18
  -2  -4  -2    0.82    0.17
   2   4   2    1.04    0.20
   2   4   2    1.31    0.22
   2   4   2    1.33    0.25
   2   4   2    1.07    0.21
   3  -4   2    1.94    0.25
  -3  -4  -2    2.12    0.30
  -3  -4  -2    2.41    0.27
   3  -4   2    1.94    0.22
  -3  -4  -2    1.65    0.27
   3  -4   2    2.18    0.23
   3  -4   2    1.91    0.37
   3  -4   2    2.17    0.28
  -3   4  -2    1.76    0.24
  -3   4  -2    2.08    0.30
   3   4   2    2.00    0.23
  -3   4  -2    2.59    0.22
   3   4   2    2.19    0.36
   3   4   2    2.00    0.38
  -3   4  -2    2.35    0.22
   3   4   2    2.20    0.29
  -4  -4  -2    1.85    0.40
   4  -4   2    2.33    0.46
   4  -4   2    2.31    0.36
   4  -4   2    1.52    0.23
  -4  -4  -2    1.91    0.31
   4  -4   2    1.33    0.21
   4  -4   2    1.80    0.26
  -4  -4  -2    1.63    0.30
  -4  -4  -2    1.67    0.27
   4   4   2    1.76    0.33
   4   4   2    1.37    0.30
  -4   4  -2    1.40    0.26
  -4   4  -2    1.61    0.37
   4   4   2    1.46    0.32
   4   4   2    1.87    0.35
  -4   4  -2    1.53    0.32
  -4   4  -2    1.52    0.24
   5  -4   2    0.56    0.34
  -5  -4  -2    1.21    0.45
   5  -4   2    0.98    0.36
  -5  -4  -2    0.67    0.27
   5  -4   2    0.31    0.24
   5  -4   2    0.98    0.29
   5  -4   2    0.79    0.46
  -5  -4  -2    0.72    0.23
  -5  -4  -2    1.29    0.36
   5   4   2    1.30    0.49
   5   4   2    0.83    0.17
   5   4   2    0.64    0.36
  -5   4  -2    0.57    0.24
  -5   4  -2    0.79    0.22
  -5   4  -2    0.68    0.36
  -5   4  -2    0.74    0.42
   5   4   2    0.53    0.24
   6  -4   2    1.98    0.37
  -6  -4  -2    3.11    0.44
   6  -4   2    2.53    0.52
  -6  -4  -2    3.36    0.51
   6  -4   2    2.83    0.49
   6  -4   2    2.54    0.42
  -6  -4  -2    2.73    0.50
  -6  -4  -2    3.08    0.79
   6  -4   2    3.43    0.59
   6  -4   2    2.71    0.61
   6   4   2    2.60    0.47
  -6   4  -2    1.94    0.40
  -6   4  -2    3.34    0.56
   6   4   2    1.85    0.51
  -6   4  -2    2.46    0.66
   6   4   2    3.12    0.53
   6   4   2    2.70    0.72
   7  -4   2    0.51    0.48
   7  -4   2   -0.16    0.58
  -7  -4  -2    1.36    0.56
   7  -4   2   -0.01    0.38
  -7  -4  -2    0.46    0.24
   7  -4   2   -0.11    0.56
  -7  -4  -2    2.16    0.85
  -7  -4  -2    1.71    0.51
   7  -4   2   -0.82    0.52
   7   4   2    0.28    0.88
   7   4   2    0.63    0.53
   7   4   2    0.81    0.48
  -7   4  -2    0.81    0.41
  -7   4  -2    0.95    0.54
  -7   4  -2    1.38    0.53
   7   4   2    1.10    0.57
   8  -4   2   -0.81    1.10
  -8  -4  -2    0.08    0.54
   8  -4   2   -0.20    0.69
  -8  -4  -2   -0.53    0.45
  -8  -4  -2    0.76    0.60
   8   4   2   -0.05    0.75
  -8   4  -2    0.37    0.72
  -8   4  -2   -0.29    0.98
   8   4   2    1.77    0.84
   8  -5  -2   -0.39    1.04
  -8  -5   2   -0.17    0.70
  -8  -5   2   -0.57    0.60
  -8   5   2    0.25    0.72
   7  -5  -2    0.93    0.78
   7  -5  -2    0.86    0.40
  -7  -5   2    0.51    0.53
  -7  -5   2   -0.19    0.41
   7  -5  -2    0.59    0.71
  -7   5   2    0.47    0.52
   7   5  -2    1.11    0.48
  -7   5   2    0.65    0.44
   6  -5  -2    0.72    0.40
   6  -5  -2    0.46    0.70
  -6  -5   2    0.97    0.43
  -6  -5   2    0.51    0.34
   6  -5  -2    0.32    0.38
   6  -5  -2    0.51    0.36
   6  -5  -2    0.00    0.39
  -6   5   2    0.08    0.31
  -6   5   2    0.53    0.37
   6   5  -2    0.27    0.35
   6   5  -2    0.94    0.35
  -6   5   2    0.64    0.41
   6   5  -2    0.36    0.54
   5  -5  -2   21.58    1.47
   5  -5  -2   20.30    1.27
   5  -5  -2   17.79    1.32
  -5  -5   2   18.43    1.26
  -5  -5   2   19.27    1.27
   5  -5  -2   21.90    1.29
   5  -5  -2   19.97    1.39
   5   5  -2   20.16    1.41
  -5   5   2   18.99    1.26
   5   5  -2   18.52    1.27
  -5   5   2   17.80    1.30
  -5   5   2   19.06    1.31
   5   5  -2   19.46    1.27
  -5   5   2   18.38    1.31
   5   5  -2   21.41    1.28
  -4  -5   2   13.08    0.89
   4  -5  -2   13.10    0.89
   4  -5  -2   14.11    0.90
   4  -5  -2   14.79    0.95
   4  -5  -2   13.95    0.89
  -4  -5   2   12.79    0.90
   4  -5  -2   14.01    1.05
  -4   5   2   12.61    0.89
   4   5  -2   14.59    1.02
  -4   5   2   13.92    0.91
  -4   5   2   11.95    0.90
  -4   5   2   13.71    0.92
   4   5  -2   13.91    0.92
   4   5  -2   15.35    0.89
   4   5  -2   13.63    0.92
  -4   5   2   12.37    0.97
   3  -5  -2    1.09    0.29
  -3  -5   2    0.94    0.19
  -3  -5   2    0.95    0.35
  -3  -5   2    0.88    0.20
   3  -5  -2    1.14    0.23
  -3  -5   2    0.75    0.19
   3  -5  -2    1.22    0.26
   3  -5  -2    1.50    0.32
   3  -5  -2    1.18    0.22
   3   5  -2    0.96    0.09
   3   5  -2    0.94    0.23
  -3   5   2    1.26    0.42
   3   5  -2    0.77    0.09
  -3   5   2    0.77    0.24
  -3   5   2    1.19    0.23
  -3   5   2    1.37    0.26
  -3   5   2    1.11    0.24
   3   5  -2    1.04    0.20
  -2  -5   2   -0.05    0.11
  -2  -5   2    0.24    0.25
   2  -5  -2    0.20    0.13
   2  -5  -2    0.00    0.15
   2  -5  -2    0.12    0.14
   2  -5  -2    0.26    0.18
  -2  -5   2    0.23    0.11
  -2  -5   2    0.07    0.12
   2   5  -2   -0.02    0.23
   2   5  -2   -0.16    0.13
   2   5  -2    0.12    0.08
   2   5  -2    0.04    0.13
  -2   5   2   -0.06    0.15
   2   5  -2    0.17    0.07
   2   5  -2   -0.06    0.12
  -2   5   2    0.13    0.14
  -2   5   2    0.09    0.18
  -1  -5   2   12.10    0.71
   1  -5  -2   10.33    0.74
  -1  -5   2   10.50    0.70
   1  -5  -2   12.11    0.79
   1  -5  -2   11.55    0.74
  -1  -5   2   12.33    0.71
   1  -5  -2   12.73    0.75
   1  -5  -2   12.18    0.74
  -1  -5   2   11.80    0.78
  -1   5   2   11.09    0.75
   1   5  -2   12.40    0.70
  -1   5   2   12.34    0.74
   1   5  -2   11.04    0.75
  -1   5   2   12.09    0.80
   1   5  -2   12.22    0.70
   1   5  -2   12.00    0.71
   1   5  -2   11.26    0.70
   0  -5   2    4.41    0.38
   0  -5   2    4.31    0.34
   0  -5  -2    4.65    0.35
   0  -5  -2    4.47    0.38
   0  -5   2    4.88    0.32
   0  -5  -2    4.84    0.39
   0  -5  -2    4.83    0.38
   0  -5  -2    5.31    0.38
   0   5   2    4.77    0.36
   0   5  -2    5.23    0.34
   0   5   2    3.98    0.38
   0   5   2    4.95    0.42
   0   5  -2    4.63    0.32
   0   5  -2    5.03    0.33
   0   5  -2    4.27    0.29
   0   5  -2    4.54    0.37
   0   5   2    4.36    0.35
   0   5   2    5.12    0.35
   1  -5   2    0.86    0.15
  -1  -5  -2    0.95    0.19
  -1  -5  -2    0.82    0.18
  -1  -5  -2    0.97    0.19
   1  -5   2    0.97    0.17
   1  -5   2    0.79    0.10
  -1  -5  -2    0.95    0.19
   1  -5   2    0.88    0.17
  -1  -5  -2    1.05    0.17
  -1   5  -2    1.00    0.18
   1   5   2    0.79    0.17
  -1   5  -2    1.16    0.19
   1   5   2    1.06    0.23
  -1   5  -2    0.99    0.17
  -1   5  -2    1.38    0.21
   1   5   2    0.94    0.18
   1   5   2    0.93    0.20
   1   5   2    0.74    0.17
  -2  -5  -2   18.58    1.09
   2  -5   2   16.89    1.09
  -2  -5  -2   17.26    1.10
  -2  -5  -2   16.77    1.09
   2  -5   2   16.53    1.08
  -2  -5  -2   17.61    1.07
   2  -5   2   17.71    1.05
   2  -5   2   17.09    1.03
  -2  -5  -2   17.10    1.09
   2  -5   2   18.11    1.09
  -2   5  -2   19.51    1.03
   2   5   2   17.55    1.08
   2   5   2   17.54    1.11
  -2   5  -2   20.78    1.11
   2   5   2   16.97    1.10
  -2   5  -2   19.41    1.09
   2   5   2   16.55    1.08
  -2   5  -2   17.46    1.06
  -2   5  -2   17.20    1.09
  -3  -5  -2    9.41    0.66
   3  -5   2   10.29    0.68
   3  -5   2    9.82    0.61
  -3  -5  -2   10.38    0.70
  -3  -5  -2    8.23    0.65
  -3  -5  -2    8.79    0.68
   3  -5   2    9.67    0.72
  -3  -5  -2    9.02    0.64
   3  -5   2    9.60    0.62
  -3  -5  -2   11.19    0.68
   3   5   2    8.69    0.68
  -3   5  -2   10.60    0.62
  -3   5  -2    8.80    0.64
  -3   5  -2   11.11    0.69
  -3   5  -2    9.42    0.69
   3   5   2    9.59    0.65
   3   5   2    9.99    0.73
   4  -5   2    0.17    0.20
  -4  -5  -2   -0.22    0.23
   4  -5   2    0.31    0.33
   4  -5   2   -0.15    0.15
  -4  -5  -2   -0.16    0.22
   4  -5   2   -0.27    0.30
  -4  -5  -2   -0.15    0.19
   4  -5   2   -0.07    0.25
  -4  -5  -2    0.09    0.18
  -4  -5  -2   -0.02    0.17
  -4   5  -2   -0.19    0.18
  -4   5  -2   -0.27    0.23
   4   5   2   -0.13    0.26
  -4   5  -2    0.11    0.25
  -4   5  -2    0.05    0.29
   4   5   2    0.26    0.13
   4   5   2   -0.03    0.22
  -4   5  -2    0.19    0.32
   4   5   2    0.02    0.23
  -5  -5  -2    0.03    0.23
   5  -5   2    0.28    0.40
   5  -5   2    0.19    0.47
  -5  -5  -2    0.41    0.36
  -5  -5  -2    0.30    0.34
   5  -5   2    0.38    0.29
   5   5   2    0.29    0.28
  -5   5  -2    0.83    0.47
  -5   5  -2    0.33    0.28
   5   5   2    0.44    0.45
   5   5   2    0.38    0.40
   5   5   2    0.05    0.36
  -5   5  -2    0.49    0.36
   6  -5   2    3.95    0.51
   6  -5   2    3.36    0.74
   6  -5   2    3.70    0.74
   6  -5   2    3.01    0.46
  -6  -5  -2    4.46    0.46
  -6  -5  -2    3.31    0.78
   6  -5   2    3.76    0.74
  -6  -5  -2    4.15    0.51
   6   5   2    3.85    0.54
  -6   5  -2    4.58    0.77
  -6   5  -2    5.39    0.91
   6   5   2    5.25    0.75
  -6   5  -2    4.99    0.63
  -6   5  -2    3.97    0.58
   6   5   2    3.07    0.60
   6   5   2    4.34    0.82
   7  -5   2    0.31    0.76
  -7  -5  -2    1.23    0.31
   7  -5   2    1.21    0.43
   7  -5   2    1.55    0.55
  -7  -5  -2    2.04    0.68
  -7  -5  -2    0.19    0.90
   7  -5   2    2.11    0.99
   7   5   2    1.49    0.51
  -7   5  -2    2.29    0.52
  -7   5  -2    0.20    0.71
   7   5   2    0.26    0.82
   7   5   2    2.43    0.79
  -7   5  -2    0.72    0.77
  -7   5  -2    1.37    0.52
   8  -5   2    0.28    0.62
  -8  -5  -2   -0.09    1.15
  -8  -5  -2   -0.56    0.43
   8  -5   2   -0.82    0.80
   8   5   2   -1.45    1.15
   8   5   2    1.35    0.76
  -8   5  -2    0.21    0.58
   8   5   2    0.84    1.59
  -8  -6   2   -0.02    0.77
   8  -6  -2   -1.42    0.88
  -8  -6   2   -0.66    0.73
  -8   6   2    1.12    0.60
  -8   6   2   -0.62    0.62
  -8   6   2   -0.35    0.70
   8   6  -2    1.02    1.24
  -7  -6   2    0.23    0.33
  -7  -6   2   -0.23    0.55
   7  -6  -2    1.07    0.99
   7  -6  -2   -0.42    0.47
  -7  -6   2   -0.53    0.54
   7  -6  -2    0.15    0.73
  -7   6   2   -0.28    0.44
   7   6  -2   -0.60    0.66
  -7   6   2    0.35    0.59
  -7   6   2   -0.32    0.46
  -7   6   2    0.32    0.63
   6  -6  -2    6.67    0.74
  -6  -6   2    4.74    0.64
   6  -6  -2    5.79    1.00
   6  -6  -2    5.34    0.97
  -6  -6   2    5.02    0.65
   6  -6  -2    5.11    0.79
  -6  -6   2    5.98    0.76
   6   6  -2    6.19    0.80
   6   6  -2    5.38    0.82
  -6   6   2    5.51    0.68
  -6   6   2    4.58    0.60
  -6   6   2    7.50    0.84
   6   6  -2    7.03    1.01
   6   6  -2    4.77    0.63
   5  -6  -2   21.30    1.35
   5  -6  -2   23.66    1.37
  -5  -6   2   20.07    1.36
  -5  -6   2   19.57    1.31
  -5  -6   2   20.31    1.31
   5  -6  -2   21.50    1.37
   5  -6  -2   22.08    1.53
   5   6  -2   22.30    1.33
  -5   6   2   17.18    1.32
  -5   6   2   20.84    1.35
  -5   6   2   19.87    1.53
  -5   6   2   18.38    1.34
   5   6  -2   21.93    1.51
   5   6  -2   19.54    1.38
   5   6  -2   21.19    1.33
  -5   6   2   20.84    1.35
   4  -6  -2    7.25    0.64
  -4  -6   2    6.49    0.56
   4  -6  -2    7.05    0.52
   4  -6  -2    6.13    0.56
   4  -6  -2    7.35    0.76
  -4  -6   2    6.05    0.51
   4  -6  -2    6.50    0.57
  -4   6   2    6.83    0.76
  -4   6   2    5.80    0.52
   4   6  -2    6.72    0.58
  -4   6   2    6.75    0.54
   4   6  -2    6.72    0.70
  -4   6   2    6.02    0.55
   4   6  -2    6.23    0.59
   4   6  -2    6.82    0.57
  -4   6   2    6.04    0.57
  -3  -6   2    0.16    0.19
   3  -6  -2   -0.06    0.19
   3  -6  -2    0.28    0.22
   3  -6  -2   -0.12    0.18
   3  -6  -2    0.21    0.16
   3  -6  -2    0.25    0.14
  -3  -6   2    0.21    0.24
  -3  -6   2    0.12    0.14
  -3   6   2    0.35    0.22
  -3   6   2    0.35    0.33
  -3   6   2    0.15    0.16
   3   6  -2    0.40    0.20
   3   6  -2    0.36    0.14
   3   6  -2    0.15    0.21
  -3   6   2    0.26    0.17
   3   6  -2    0.17    0.14
   2  -6  -2    5.52    0.53
  -2  -6   2    4.75    0.38
  -2  -6   2    5.74    0.41
   2  -6  -2    5.74    0.45
  -2  -6   2    5.57    0.42
   2  -6  -2    5.09    0.44
   2  -6  -2    6.06    0.45
   2  -6  -2    6.54    0.47
  -2  -6   2    5.62    0.54
  -2   6   2    5.85    0.42
   2   6  -2    6.34    0.39
   2   6  -2    5.96    0.36
   2   6  -2    5.33    0.41
  -2   6   2    4.39    0.49
  -2   6   2    5.70    0.45
   2   6  -2    5.31    0.49
  -2   6   2    5.21    0.41
   1  -6  -2   21.72    1.52
   1  -6  -2   25.41    1.53
   1  -6  -2   26.94    1.58
  -1  -6   2   24.07    1.48
  -1  -6   2   24.14    1.51
   1  -6  -2   26.70    1.53
   1  -6  -2   25.88    1.54
  -1  -6   2   27.77    1.51
  -1  -6   2   27.99    1.57
  -1   6   2   25.15    1.53
  -1   6   2   24.83    1.53
   1   6  -2   25.97    1.50
   1   6  -2   28.33    1.48
  -1   6   2   24.19    1.56
  -1   6   2   24.07    1.53
   1   6  -2   27.67    1.55
   1   6  -2   27.32    1.48
   1   6  -2   26.52    1.50
   0  -6  -2   13.94    0.87
   0  -6   2   12.41    0.81
   0  -6   2   13.92    0.82
   0  -6  -2   13.80    0.85
   0  -6  -2   13.76    0.84
   0  -6  -2   12.60    0.85
   0  -6   2   13.55    0.81
   0  -6   2   13.66    0.86
   0  -6  -2   14.04    0.85
   0   6  -2   13.68    0.85
   0   6   2   13.02    0.84
   0   6  -2   13.01    0.81
   0   6  -2   13.31    0.81
   0   6   2   13.44    0.88
   0   6   2   11.40    0.83
   0   6  -2   14.28    0.76
   0   6  -2   14.16    0.81
   0   6   2   13.52    0.85
   0   6   2   12.30    0.84
  -1  -6  -2    4.25    0.34
   1  -6   2    3.91    0.35
  -1  -6  -2    3.90    0.35
   1  -6   2    4.03    0.32
  -1  -6  -2    4.22    0.38
  -1  -6  -2    4.23    0.35
   1  -6   2    4.32    0.35
  -1   6  -2    4.03    0.24
   1   6   2    4.37    0.40
   1   6   2    3.74    0.33
   1   6   2    4.10    0.37
  -1   6  -2    4.06    0.32
  -1   6  -2    4.46    0.36
   1   6   2    3.79    0.35
   1   6   2    3.47    0.35
  -1   6  -2    4.04    0.32
   2  -6   2   39.71    2.30
   2  -6   2   40.75    2.28
   2  -6   2   37.64    2.29
   2  -6   2   39.31    2.31
  -2  -6  -2   37.03    2.29
  -2  -6  -2   39.97    2.30
  -2  -6  -2   41.58    2.30
  -2  -6  -2   40.79    2.33
  -2  -6  -2   39.24    2.32
   2  -6   2   38.13    2.24
   2   6   2   38.99    2.29
   2   6   2   39.17    2.32
  -2   6  -2   41.90    2.24
  -2   6  -2   39.67    2.31
  -2   6  -2   39.95    2.29
  -2   6  -2   38.54    2.31
  -2   6  -2   43.12    2.30
   2   6   2   37.02    2.31
   2   6   2   39.24    2.33
  -3  -6  -2    1.13    0.22
   3  -6   2    1.13    0.17
   3  -6   2    1.33    0.23
  -3  -6  -2    1.38    0.18
  -3  -6  -2    1.41    0.25
   3  -6   2    1.18    0.29
  -3  -6  -2    1.19    0.35
   3  -6   2    1.27    0.20
  -3  -6  -2    1.17    0.19
   3  -6   2    0.95    0.29
  -3  -6  -2    1.10    0.23
  -3   6  -2    1.26    0.19
   3   6   2    1.22    0.30
   3   6   2    1.19    0.24
  -3   6  -2    1.46    0.38
  -3   6  -2    1.45    0.31
   3   6   2    1.04    0.21
   3   6   2    1.67    0.31
  -3   6  -2    1.60    0.30
  -3   6  -2    0.99    0.19
  -4  -6  -2   -0.06    0.19
   4  -6   2   -0.14    0.16
   4  -6   2    0.30    0.34
  -4  -6  -2    0.35    0.24
  -4  -6  -2   -0.27    0.22
  -4  -6  -2   -0.04    0.22
   4  -6   2   -0.10    0.27
  -4  -6  -2    0.27    0.25
  -4  -6  -2    0.42    0.18
  -4   6  -2   -0.15    0.29
  -4   6  -2   -0.27    0.17
   4   6   2   -0.28    0.18
  -4   6  -2   -0.02    0.24
   4   6   2   -0.09    0.21
   4   6   2    0.06    0.28
  -4   6  -2   -0.08    0.21
   4   6   2    0.21    0.36
   5  -6   2   -0.02    0.27
  -5  -6  -2   -0.14    0.39
  -5  -6  -2    0.35    0.26
   5  -6   2   -0.19    0.26
   5  -6   2    0.35    0.36
  -5  -6  -2    0.24    0.34
  -5  -6  -2    0.17    0.26
  -5  -6  -2    0.18    0.40
   5  -6   2   -0.24    0.34
  -5  -6  -2    0.00    0.49
   5   6   2    0.88    0.39
  -5   6  -2   -0.16    0.26
   5   6   2    0.29    0.34
  -5   6  -2    0.06    0.33
  -5   6  -2    0.28    0.26
  -5   6  -2   -0.27    0.26
   5   6   2    0.16    0.45
   5   6   2   -0.10    0.36
  -6  -6  -2    3.89    0.59
  -6  -6  -2    4.13    0.55
   6  -6   2    3.04    0.49
   6  -6   2    3.59    0.53
   6  -6   2    2.75    0.41
   6  -6   2    3.24    0.58
   6  -6   2    2.50    0.43
  -6   6  -2    4.20    0.49
   6   6   2    3.34    0.61
   6   6   2    1.99    0.56
  -6   6  -2    4.20    0.60
   6   6   2    3.35    0.45
   6   6   2    3.20    0.77
  -6   6  -2    2.46    0.40
  -7  -6  -2    5.46    0.85
   7  -6   2    5.33    0.65
   7  -6   2    5.73    0.74
   7  -6   2    4.33    0.73
   7  -6   2    5.82    0.99
  -7  -6  -2    6.48    0.85
  -7   6  -2    4.57    0.60
   7   6   2    6.39    1.11
   7   6   2    5.38    0.95
  -7   6  -2    6.31    0.68
  -7   6  -2    4.07    0.66
   7   6   2    6.61    0.86
  -7   6  -2    3.74    0.78
  -8  -6  -2    1.60    0.70
   8  -6   2   -1.13    1.11
  -8   6  -2   -0.78    0.63
  -8   6  -2    0.23    0.55
   8   6   2    0.36    0.91
   8   6   2    2.41    1.34
   8  -7  -2   -2.04    1.35
  -8  -7   2   -0.92    0.68
   8   7  -2    0.49    1.27
  -8   7   2   -0.52    0.57
  -8   7   2    0.62    0.73
  -8   7   2    0.23    0.66
   7  -7  -2    1.03    0.47
  -7  -7   2    0.62    0.45
  -7  -7   2    0.66    0.71
   7  -7  -2   -0.38    0.87
  -7  -7   2    0.94    0.52
  -7   7   2    0.73    0.62
  -7   7   2    0.08    0.46
  -7   7   2    0.88    0.52
  -7   7   2    1.48    0.58
   6  -7  -2    0.57    0.48
  -6  -7   2    0.05    0.45
   6  -7  -2    0.77    0.37
  -6  -7   2    0.19    0.32
   6  -7  -2   -1.00    0.52
  -6  -7   2    0.24    0.35
   6  -7  -2   -0.23    0.45
  -6   7   2    0.22    0.38
  -6   7   2   -0.42    0.41
  -6   7   2   -0.73    0.38
  -6   7   2    0.43    0.48
   6   7  -2    0.14    0.38
   6   7  -2    0.40    0.42
   5  -7  -2    6.69    0.68
   5  -7  -2    6.00    0.69
   5  -7  -2    6.50    0.86
   5  -7  -2    6.64    0.73
  -5  -7   2    7.30    0.58
  -5  -7   2    6.56    0.67
   5  -7  -2    5.37    0.85
  -5  -7   2    6.78    0.60
  -5   7   2    6.53    0.90
   5   7  -2    6.03    0.61
  -5   7   2    6.49    0.61
   5   7  -2    5.72    0.85
   5   7  -2    7.47    0.76
  -5   7   2    7.36    0.67
   5   7  -2    7.20    0.75
  -5   7   2    6.54    0.77
  -5   7   2    7.61    0.65
  -4  -7   2    1.53    0.31
   4  -7  -2    1.73    0.37
  -4  -7   2    1.64    0.29
   4  -7  -2    2.77    0.61
  -4  -7   2    1.98    0.53
   4  -7  -2    2.24    0.41
   4  -7  -2    1.92    0.44
  -4   7   2    2.71    0.45
  -4   7   2    1.50    0.58
  -4   7   2    1.53    0.35
   4   7  -2    1.74    0.33
   4   7  -2    1.25    0.32
   4   7  -2    1.74    0.53
   4   7  -2    1.70    0.33
  -4   7   2    1.53    0.33
  -4   7   2    1.48    0.34
   3  -7  -2    2.14    0.39
   3  -7  -2    2.51    0.40
  -3  -7   2    1.81    0.25
   3  -7  -2    1.55    0.44
  -3  -7   2    2.06    0.47
   3  -7  -2    1.67    0.33
  -3  -7   2    1.66    0.29
  -3   7   2    2.13    0.30
   3   7  -2    1.94    0.30
  -3   7   2    1.83    0.38
  -3   7   2    1.87    0.36
  -3   7   2    1.84    0.32
   3   7  -2    2.28    0.25
   3   7  -2    1.75    0.26
   3   7  -2    1.92    0.35
   2  -7  -2    3.26    0.38
  -2  -7   2    3.62    0.29
   2  -7  -2    4.15    0.42
  -2  -7   2    2.88    0.39
   2  -7  -2    3.78    0.39
  -2  -7   2    3.27    0.33
   2  -7  -2    3.93    0.34
   2  -7  -2    4.10    0.39
   2   7  -2    4.10    0.30
   2   7  -2    3.72    0.33
   2   7  -2    4.08    0.25
   2   7  -2    3.36    0.42
  -2   7   2    3.90    0.40
  -2   7   2    3.72    0.52
  -2   7   2    3.83    0.40
  -2   7   2    3.64    0.36
   1  -7  -2   30.08    1.67
   1  -7  -2   24.26    1.65
  -1  -7   2   28.77    1.69
   1  -7  -2   28.62    1.71
  -1  -7   2   25.18    1.60
   1  -7  -2   27.89    1.67
   1  -7  -2   28.20    1.67
  -1  -7   2   28.42    1.63
  -1  -7   2   24.28    1.60
   1   7  -2   29.79    1.69
   1   7  -2   30.73    1.61
  -1   7   2   28.04    1.72
   1   7  -2   30.38    1.60
  -1   7   2   27.67    1.67
  -1   7   2   27.02    1.66
  -1   7   2   28.64    1.67
   1   7  -2   27.35    1.63
   1   7  -2   27.74    1.63
   0  -7   2  127.32    6.91
   0  -7  -2  117.12    6.92
   0  -7  -2  127.29    6.92
   0  -7   2  123.17    6.93
   0  -7   2  125.36    6.90
   0  -7  -2  126.03    6.93
   0  -7   2  114.21    6.89
   0  -7  -2  126.88    6.95
   0   7  -2  133.53    6.89
   0   7  -2  119.98    6.90
   0   7   2  115.03    6.92
   0   7   2  124.91    6.93
   0   7  -2  125.43    6.93
   0   7   2  124.00    6.95
   0   7   2  106.13    6.91
   0   7   2  122.79    6.93
   0   7  -2  124.99    6.91
   1  -7   2  186.46   10.38
  -1  -7  -2  195.74   10.40
  -1  -7  -2  184.56   10.39
  -1  -7  -2  180.78   10.37
  -1  -7  -2  188.42   10.39
  -1  -7  -2  186.06   10.37
   1  -7   2  175.98   10.36
   1  -7   2  192.93   10.38
  -1   7  -2  198.16   10.36
  -1   7  -2  187.02   10.38
   1   7   2  188.61   10.39
   1   7   2  163.19   10.37
   1   7   2  186.54   10.39
   1   7   2  182.91   10.39
   1   7   2  165.21   10.37
  -1   7  -2  190.47   10.37
  -1   7  -2  185.37   10.37
  -2  -7  -2   74.53    4.27
   2  -7   2   75.35    4.26
  -2  -7  -2   79.42    4.25
  -2  -7  -2   70.07    4.23
   2  -7   2   73.40    4.24
  -2  -7  -2   73.53    4.27
   2  -7   2   76.55    4.25
   2  -7   2   68.27    4.17
  -2  -7  -2   76.41    4.25
   2  -7   2   75.66    4.24
  -2   7  -2   74.82    4.24
   2   7   2   73.84    4.25
   2   7   2   68.85    4.25
  -2   7  -2   83.19    4.25
  -2   7  -2   75.99    4.25
  -2   7  -2   71.56    4.18
   2   7   2   72.32    4.27
  -2   7  -2   75.74    4.26
   3  -7   2    0.44    0.20
  -3  -7  -2    0.12    0.28
   3  -7   2   -0.09    0.18
   3  -7   2    0.18    0.19
  -3  -7  -2   -0.07    0.16
   3  -7   2    0.45    0.27
  -3  -7  -2    0.25    0.19
   3  -7   2    0.27    0.11
  -3  -7  -2   -0.04    0.16
  -3   7  -2    0.29    0.22
  -3   7  -2    0.11    0.26
   3   7   2    0.39    0.19
  -3   7  -2    0.08    0.22
  -3   7  -2    0.27    0.14
   3   7   2    0.23    0.25
   3   7   2    0.18    0.10
   3   7   2    0.23    0.20
  -3   7  -2    0.23    0.13
  -4  -7  -2    1.22    0.45
  -4  -7  -2    1.46    0.31
  -4  -7  -2    1.68    0.38
  -4  -7  -2    1.79    0.29
   4  -7   2    1.51    0.32
   4  -7   2    1.90    0.38
  -4  -7  -2    1.24    0.28
   4  -7   2    1.84    0.44
  -4  -7  -2    1.68    0.35
   4  -7   2    1.41    0.21
  -4   7  -2    1.20    0.23
   4   7   2    1.56    0.32
   4   7   2    2.52    0.48
   4   7   2    1.47    0.38
  -4   7  -2    1.93    0.42
  -4   7  -2    1.71    0.35
   4   7   2    1.79    0.39
  -4   7  -2    2.14    0.37
  -4   7  -2    1.63    0.28
  -5  -7  -2    0.48    0.25
  -5  -7  -2    0.00    0.46
  -5  -7  -2    0.33    0.25
   5  -7   2    0.00    0.27
  -5  -7  -2    0.03    0.35
   5  -7   2    0.42    0.53
  -5  -7  -2   -0.11    0.41
   5  -7   2    0.10    0.43
   5  -7   2    1.08    0.45
   5  -7   2   -0.17    0.19
  -5  -7  -2    0.00    0.35
  -5   7  -2    0.24    0.28
   5   7   2    0.06    0.32
   5   7   2    0.13    0.49
  -5   7  -2   -0.20    0.39
   5   7   2    0.24    0.26
  -5   7  -2    0.95    0.48
  -5   7  -2    0.08    0.35
   5   7   2   -0.21    0.40
  -6  -7  -2    0.89    0.76
  -6  -7  -2    1.25    0.31
  -6  -7  -2    1.05    0.46
   6  -7   2    0.49    0.44
   6  -7   2    0.95    0.72
  -6  -7  -2    1.73    0.45
  -6  -7  -2    1.28    0.30
   6  -7   2    1.58    0.40
   6   7   2    0.67    0.76
   6   7   2    1.29    0.50
  -6   7  -2    1.52    0.72
  -6   7  -2    1.44    0.52
  -6   7  -2    0.83    0.58
   6   7   2    0.15    0.57
  -6   7  -2    1.22    0.35
   6   7   2    1.27    0.54
  -7  -7  -2    2.21    0.57
  -7  -7  -2    1.17    0.57
   7  -7   2    1.38    0.43
   7  -7   2    1.83    1.06
   7  -7   2    1.06    0.55
  -7  -7  -2    2.16    0.45
  -7  -7  -2    0.07    1.64
  -7  -7  -2    1.36    0.43
   7   7   2    1.57    0.68
  -7   7  -2    0.20    0.55
  -7   7  -2   -0.22    0.62
   7   7   2    3.49    0.84
  -7   7  -2    1.45    0.46
  -7   7  -2    1.35    1.00
   7   7   2    1.92    0.85
   8  -7   2    1.82    1.21
  -8  -7  -2    0.12    1.24
  -8  -7  -2    0.72    0.71
   8   7   2    0.55    1.16
  -8   7  -2   -0.05    0.72
  -8   7  -2   -1.16    1.99
  -8   7  -2   -0.45    0.80
  -8  -8   2    1.28    0.63
  -8  -8   2    1.22    0.67
  -8   8   2    1.55    0.71
  -8   8   2   -0.07    0.71
  -8   8   2    0.19    0.57
  -7  -8   2    1.15    0.67
   7  -8  -2   -0.68    0.58
   7  -8  -2   -0.58    0.64
  -7   8   2    0.79    0.53
  -7   8   2    0.40    0.55
  -7   8   2   -0.42    0.43
  -6  -8   2    0.86    0.35
  -6  -8   2    0.80    0.36
  -6  -8   2    0.98    0.58
   6  -8  -2   -0.19    0.64
   6  -8  -2    0.65    0.74
   6  -8  -2    0.15    0.32
   6  -8  -2    0.17    0.52
  -6   8   2    0.05    0.43
  -6   8   2    0.72    0.33
   6   8  -2    1.29    0.54
   6   8  -2    1.78    0.47
  -6   8   2    0.75    0.32
  -6   8   2   -0.37    0.61
   6   8  -2    0.61    0.44
   5  -8  -2    2.88    0.58
  -5  -8   2    2.80    0.44
  -5  -8   2    2.40    0.48
   5  -8  -2    2.93    0.46
   5  -8  -2    2.90    0.57
  -5  -8   2    2.81    0.46
   5  -8  -2    2.72    0.51
   5   8  -2    3.38    0.46
  -5   8   2    4.56    0.91
  -5   8   2    3.13    0.65
  -5   8   2    2.52    0.48
  -5   8   2    3.91    0.64
   5   8  -2    2.91    0.52
   5   8  -2    2.44    0.47
  -5   8   2    2.31    0.46
   5   8  -2    3.53    0.54
   4  -8  -2   17.88    1.34
   4  -8  -2   18.30    1.23
  -4  -8   2   18.92    1.35
   4  -8  -2   18.98    1.25
   4  -8  -2   19.72    1.31
  -4  -8   2   18.30    1.28
  -4  -8   2   17.00    1.18
  -4  -8   2   17.64    1.21
   4  -8  -2   20.20    1.24
  -4   8   2   18.40    1.21
  -4   8   2   17.73    1.37
   4   8  -2   18.49    1.21
  -4   8   2   18.03    1.23
   4   8  -2   18.15    1.25
   4   8  -2   19.85    1.17
  -4   8   2   18.47    1.24
   4   8  -2   17.73    1.21
  -3  -8   2    5.27    0.53
   3  -8  -2    5.62    0.55
  -3  -8   2    4.99    0.44
   3  -8  -2    6.13    0.54
  -3  -8   2    4.71    0.44
   3  -8  -2    4.95    0.45
   3  -8  -2    4.76    0.52
   3  -8  -2    4.51    0.49
  -3   8   2    5.31    0.71
  -3   8   2    4.78    0.52
   3   8  -2    5.76    0.43
  -3   8   2    4.74    0.46
   3   8  -2    5.19    0.58
   3   8  -2    4.50    0.45
   3   8  -2    4.48    0.48
  -3   8   2    4.76    0.51
  -2  -8   2    1.06    0.20
   2  -8  -2    1.77    0.35
   2  -8  -2    1.52    0.34
   2  -8  -2    1.70    0.28
   2  -8  -2    1.42    0.26
  -2  -8   2    1.39    0.40
  -2  -8   2    1.77    0.29
   2  -8  -2    1.86    0.35
   2   8  -2    1.28    0.21
   2   8  -2    1.20    0.28
  -2   8   2    1.44    0.33
  -2   8   2    1.47    0.24
   2   8  -2    1.41    0.18
   2   8  -2    1.31    0.16
  -2   8   2    1.47    0.27
   2   8  -2    1.39    0.25
  -2   8   2    1.20    0.22
   1  -8  -2    0.24    0.20
  -1  -8   2    0.52    0.15
   1  -8  -2    0.68    0.17
   1  -8  -2    0.97    0.27
   1  -8  -2    0.64    0.17
  -1  -8   2    0.62    0.16
  -1  -8   2    0.46    0.13
   1  -8  -2    0.81    0.24
  -1  -8   2    0.48    0.11
  -1  -8   2    0.59    0.30
  -1   8   2    0.60    0.14
  -1   8   2    0.60    0.23
   1   8  -2    0.74    0.17
   1   8  -2    0.61    0.11
   1   8  -2    0.94    0.16
  -1   8   2    0.62    0.24
   1   8  -2    0.67    0.15
  -1   8   2    0.50    0.25
   1   8  -2    0.91    0.31
   0  -8  -2   30.37    1.72
   0  -8   2   28.49    1.69
   0  -8   2   29.08    1.70
   0  -8  -2   31.07    1.76
   0  -8  -2   29.37    1.74
   0  -8  -2   27.89    1.73
   0  -8  -2   26.84    1.71
   0  -8   2   29.61    1.73
   0  -8   2   30.50    1.71
   0   8  -2   29.57    1.73
   0   8   2   24.85    1.71
   0   8   2   27.16    1.72
   0   8   2   29.62    1.74
   0   8  -2   28.22    1.71
   0   8  -2   32.72    1.69
   0   8   2   27.34    1.73
   0   8  -2   29.83    1.71
   0   8   2   28.47    1.75
   1  -8   2  154.03    9.03
   1  -8   2  157.65    9.05
  -1  -8  -2  163.22    9.07
  -1  -8  -2  155.62    9.05
  -1  -8  -2  162.90    9.07
  -1  -8  -2  167.24    9.08
  -1  -8  -2  164.73    9.05
   1  -8   2  166.27    9.05
   1   8   2  159.04    9.08
  -1   8  -2  161.76    9.05
   1   8   2  142.03    9.05
   1   8   2  162.12    9.07
   1   8   2  146.59    9.05
  -1   8  -2  162.28    9.05
  -1   8  -2  172.39    9.04
  -1   8  -2  167.70    9.06
   1   8   2  166.34    9.08
   2  -8   2   17.30    1.12
  -2  -8  -2   17.15    1.14
   2  -8   2   17.78    1.09
   2  -8   2   17.85    1.09
   2  -8   2   15.62    0.99
   2  -8   2   15.58    1.12
  -2  -8  -2   17.40    1.11
  -2  -8  -2   17.25    1.07
  -2  -8  -2   18.72    1.09
  -2  -8  -2   17.79    1.14
  -2   8  -2   17.10    1.09
   2   8   2   16.75    1.11
   2   8   2   16.58    1.09
  -2   8  -2   16.88    1.09
  -2   8  -2   17.72    1.12
  -2   8  -2   19.58    1.08
   3  -8   2    1.40    0.33
  -3  -8  -2    1.31    0.32
   3  -8   2    0.97    0.15
   3  -8   2    1.26    0.27
  -3  -8  -2    1.04    0.21
  -3  -8  -2    0.83    0.23
   3  -8   2    1.10    0.29
  -3  -8  -2    1.00    0.27
   3  -8   2    1.35    0.35
  -3  -8  -2    1.17    0.40
   3   8   2    1.03    0.33
  -3   8  -2    1.39    0.25
  -3   8  -2    1.07    0.27
  -3   8  -2    0.80    0.16
  -3   8  -2    1.32    0.31
   3   8   2    1.27    0.31
   3   8   2    1.15    0.38
   3   8   2    0.71    0.27
  -4  -8  -2    1.88    0.28
  -4  -8  -2    1.78    0.40
   4  -8   2    1.97    0.34
  -4  -8  -2    1.27    0.31
   4  -8   2    2.02    0.45
  -4  -8  -2    1.81    0.32
  -4  -8  -2    2.30    0.44
   4  -8   2    1.67    0.31
   4  -8   2    1.39    0.32
  -4  -8  -2    1.55    0.34
   4  -8   2    1.39    0.21
   4   8   2    1.99    0.47
  -4   8  -2    1.66    0.38
  -4   8  -2    1.58    0.40
  -4   8  -2    1.34    0.23
  -4   8  -2    2.17    0.40
   4   8   2    1.57    0.41
  -4   8  -2    1.74    0.40
   4   8   2    1.95    0.41
   4   8   2    1.32    0.29
   5  -8   2    2.80    0.38
  -5  -8  -2    3.82    0.45
  -5  -8  -2    3.03    0.45
   5  -8   2    3.04    0.39
  -5  -8  -2    3.74    0.52
  -5  -8  -2    4.35    0.62
   5  -8   2    2.40    0.45
  -5  -8  -2    4.09    0.49
  -5  -8  -2    3.11    0.67
   5  -8   2    3.22    0.49
  -5   8  -2    2.76    0.59
  -5   8  -2    2.58    0.38
  -5   8  -2    3.21    0.56
   5   8   2    3.04    0.41
  -5   8  -2    3.17    0.58
   5   8   2    2.86    0.64
   5   8   2    3.78    0.64
  -5   8  -2    3.38    0.47
   5   8   2    3.80    0.60
  -6  -8  -2    0.30    0.29
   6  -8   2    0.92    0.64
   6  -8   2    0.34    0.31
   6  -8   2    0.19    0.30
  -6  -8  -2    0.38    0.42
   6  -8   2   -0.10    0.29
  -6  -8  -2    1.28    0.52
  -6  -8  -2    0.69    0.59
  -6  -8  -2    0.58    0.26
  -6   8  -2    0.08    0.32
  -6   8  -2    0.36    0.32
   6   8   2    0.93    0.59
  -6   8  -2    0.32    0.57
   6   8   2    0.74    0.45
  -6   8  -2   -0.32    0.42
   6   8   2    1.58    0.83
   7  -8   2    1.84    0.92
  -7  -8  -2    0.44    0.53
  -7  -8  -2   -0.02    0.26
  -7  -8  -2    0.47    0.73
  -7  -8  -2    1.56    0.86
   7  -8   2    0.06    0.42
   7  -8   2    0.86    0.49
  -7   8  -2    0.01    0.53
  -7   8  -2   -0.19    0.61
   7   8   2    1.12    0.97
  -7   8  -2    1.35    0.66
   7   8   2    0.59    0.63
  -7   8  -2    1.02    0.74
   8  -8   2    0.91    0.68
  -8  -8  -2   -1.52    1.29
  -8   8  -2    3.49    1.24
  -8   8  -2    0.54    0.79
  -7  -9   2    0.70    0.73
  -7  -9   2    1.08    0.54
   7  -9  -2   -0.06    1.08
   7  -9  -2    3.01    1.08
  -7   9   2    0.79    0.60
  -7   9   2    1.34    0.55
  -7   9   2    1.57    0.65
   6  -9  -2    5.76    1.09
   6  -9  -2    4.76    0.93
  -6  -9   2    3.53    0.71
   6  -9  -2    4.81    0.67
  -6  -9   2    3.57    0.58
  -6   9   2    4.93    0.75
  -6   9   2    4.88    1.20
  -6   9   2    5.12    0.85
  -6   9   2    5.03    0.80
   6   9  -2    3.39    0.69
  -6   9   2    3.95    0.76
  -5  -9   2   11.90    0.94
   5  -9  -2   12.22    0.90
   5  -9  -2   13.88    1.17
   5  -9  -2   13.25    1.07
   5  -9  -2   12.49    0.98
  -5  -9   2   12.29    1.02
  -5  -9   2   11.17    1.01
  -5  -9   2   11.55    0.93
   5  -9  -2   13.01    1.18
  -5   9   2   11.28    1.07
  -5   9   2   11.51    1.20
   5   9  -2   11.03    0.96
   5   9  -2   12.08    1.03
   5   9  -2   12.75    1.14
  -5   9   2   11.56    0.97
  -5   9   2   11.56    0.90
   4  -9  -2    5.67    0.76
   4  -9  -2    5.38    0.60
   4  -9  -2    6.09    0.63
  -4  -9   2    3.89    0.55
  -4  -9   2    4.70    0.52
  -4  -9   2    4.92    0.78
   4  -9  -2    4.99    0.54
  -4  -9   2    5.10    0.60
   4   9  -2    4.31    0.55
  -4   9   2    4.36    0.55
   4   9  -2    5.39    0.62
  -4   9   2    4.94    0.53
   4   9  -2    5.77    0.63
  -4   9   2    5.20    0.64
  -4   9   2    7.09    0.87
  -3  -9   2    1.36    0.32
   3  -9  -2    1.37    0.32
   3  -9  -2    1.61    0.47
   3  -9  -2    0.87    0.24
  -3  -9   2    1.42    0.51
   3  -9  -2    0.95    0.40
   3  -9  -2    0.91    0.33
  -3  -9   2    1.25    0.24
  -3  -9   2    0.55    0.30
  -3   9   2    1.45    0.28
   3   9  -2    0.57    0.23
  -3   9   2    1.07    0.32
   3   9  -2    1.74    0.31
   3   9  -2    1.06    0.29
  -3   9   2    0.89    0.37
   3   9  -2    1.33    0.28
  -3   9   2    1.12    0.37
   2  -9  -2    3.76    0.39
   2  -9  -2    4.44    0.45
  -2  -9   2    3.82    0.44
   2  -9  -2    4.00    0.53
  -2  -9   2    3.04    0.30
   2  -9  -2    3.88    0.42
  -2  -9   2    3.68    0.38
   2  -9  -2    3.37    0.41
  -2  -9   2    3.27    0.44
   2  -9  -2    3.51    0.40
   2   9  -2    3.93    0.32
   2   9  -2    3.52    0.39
   2   9  -2    3.97    0.27
  -2   9   2    3.74    0.39
  -2   9   2    3.73    0.43
  -2   9   2    3.62    0.37
   2   9  -2    2.90    0.47
   2   9  -2    3.63    0.38
  -2   9   2    4.44    0.60
  -1  -9   2    2.96    0.31
  -1  -9   2    3.75    0.35
  -1  -9   2    3.71    0.34
   1  -9  -2    3.36    0.48
  -1  -9   2    3.06    0.26
   1  -9  -2    2.99    0.34
  -1  -9   2    3.08    0.45
   1  -9  -2    3.55    0.45
   1  -9  -2    3.52    0.42
   1  -9  -2    3.74    0.46
   1   9  -2    4.19    0.30
  -1   9   2    3.32    0.36
   1   9  -2    3.44    0.70
   1   9  -2    3.48    0.25
  -1   9   2    3.51    0.51
   1   9  -2    3.34    0.34
  -1   9   2    3.36    0.44
  -1   9   2    3.78    0.35
   1   9  -2    3.25    0.35
   0  -9   2   23.73    1.36
   0  -9  -2   21.74    1.34
   0  -9   2   22.85    1.31
   0  -9  -2   22.98    1.35
   0  -9  -2   21.83    1.34
   0  -9  -2   21.23    1.31
   0  -9   2   20.09    1.29
   0  -9   2   21.13    1.27
   0  -9  -2   22.72    1.33
   0   9  -2   22.55    1.35
   0   9   2   21.20    1.34
   0   9   2   18.93    1.40
   0   9   2   20.57    1.33
   0   9   2   18.89    1.30
   0   9  -2   19.52    1.47
   0   9   2   19.57    1.32
   0   9  -2   24.26    1.28
   0   9  -2   20.75    1.30
  -1  -9  -2   26.30    1.57
  -1  -9  -2   26.14    1.54
  -1  -9  -2   27.02    1.57
   1  -9   2   24.47    1.53
  -1  -9  -2   25.09    1.58
  -1  -9  -2   25.75    1.54
   1  -9   2   26.89    1.57
   1  -9   2   25.95    1.55
  -1   9  -2   27.46    1.58
   1   9   2   23.87    1.55
  -1   9  -2   28.69    1.53
   1   9   2   25.10    1.56
  -1   9  -2   24.87    1.56
   1   9   2   24.67    1.56
   1   9   2   25.09    1.60
   1   9   2   21.81    1.53
   2  -9   2    0.21    0.25
   2  -9   2   -0.03    0.20
  -2  -9  -2    0.47    0.30
   2  -9   2   -0.06    0.16
  -2  -9  -2    0.09    0.17
   2  -9   2    0.38    0.22
  -2  -9  -2    0.05    0.14
  -2  -9  -2    0.00    0.23
  -2  -9  -2    0.15    0.16
   2  -9   2    0.05    0.05
   2   9   2    0.17    0.18
   2   9   2    0.17    0.11
  -2   9  -2    0.47    0.24
  -2   9  -2    0.13    0.29
  -2   9  -2    0.17    0.20
   2   9   2   -0.12    0.15
   2   9   2    0.18    0.27
   2   9   2    0.15    0.31
  -2   9  -2    0.16    0.23
   3  -9   2    1.67    0.33
   3  -9   2    1.40    0.27
  -3  -9  -2    1.28    0.39
   3  -9   2    1.14    0.21
  -3  -9  -2    1.78    0.34
  -3  -9  -2    1.46    0.31
   3  -9   2    1.40    0.33
  -3  -9  -2    1.39    0.31
   3  -9   2    1.92    0.37
  -3  -9  -2    1.56    0.25
  -3   9  -2    1.92    0.33
   3   9   2    2.22    0.45
  -3   9  -2    1.76    0.37
   3   9   2    1.50    0.27
   3   9   2    1.71    0.37
   3   9   2    1.72    0.37
  -3   9  -2    2.04    0.43
  -3   9  -2    1.80    0.39
  -4  -9  -2    0.19    0.29
   4  -9   2    0.07    0.15
   4  -9   2    0.58    0.47
  -4  -9  -2    0.22    0.39
  -4  -9  -2   -0.14    0.39
   4  -9   2    0.26    0.34
  -4  -9  -2    0.25    0.18
  -4  -9  -2   -0.03    0.24
   4  -9   2    0.42    0.29
  -4  -9  -2   -0.07    0.41
   4  -9   2   -0.25    0.39
  -4   9  -2    0.23    0.19
  -4   9  -2    0.53    0.36
   4   9   2    0.34    0.48
  -4   9  -2    0.79    0.25
   4   9   2    0.13    0.32
  -4   9  -2    0.30    0.24
  -4   9  -2    0.82    0.43
   4   9   2    0.11    0.29
   4   9   2    0.68    0.34
   5  -9   2    0.24    0.25
   5  -9   2   -0.68    0.52
   5  -9   2   -0.09    0.31
  -5  -9  -2    0.64    0.51
  -5  -9  -2    0.19    0.26
  -5  -9  -2    0.03    0.25
   5  -9   2    0.03    0.23
  -5  -9  -2    0.93    0.54
   5  -9   2    0.08    0.34
  -5  -9  -2    0.12    0.42
  -5  -9  -2    0.25    0.26
   5   9   2    0.90    0.45
  -5   9  -2    0.02    0.26
   5   9   2   -0.25    0.60
  -5   9  -2    0.58    0.44
   5   9   2    0.68    0.44
  -5   9  -2   -0.45    0.51
   5   9   2    0.45    0.38
  -5   9  -2    0.12    0.57
  -5   9  -2    0.62    0.48
   6  -9   2    1.70    0.51
   6  -9   2    0.42    0.50
   6  -9   2    0.80    0.34
  -6  -9  -2    1.17    0.28
  -6  -9  -2    1.30    0.84
   6  -9   2    1.13    0.74
  -6  -9  -2    0.65    0.45
  -6  -9  -2    1.08    0.32
  -6  -9  -2    1.89    0.76
  -6  -9  -2    0.85    0.50
  -6   9  -2    1.12    0.59
   6   9   2    0.51    0.61
  -6   9  -2    0.40    0.46
  -6   9  -2    0.83    0.37
   6   9   2    1.79    0.64
   6   9   2    0.79    0.36
  -6   9  -2    2.02    0.68
  -7  -9  -2    5.71    0.70
   7  -9   2    6.46    1.16
   7  -9   2    6.02    0.82
  -7  -9  -2    6.48    0.91
   7   9   2    7.86    1.02
  -7   9  -2    4.89    0.98
  -7   9  -2    6.38    0.85
   7   9   2    4.68    0.79
  -7   9  -2    5.97    1.06
  -7 -10   2   -0.19    0.55
  -7 -10   2    1.96    0.63
  -7  10   2    0.45    0.60
  -7  10   2    0.07    0.59
  -6 -10   2    0.17    0.61
  -6 -10   2    0.25    0.63
   6 -10  -2   -0.45    0.84
  -6 -10   2    1.12    0.38
   6 -10  -2    0.25    0.39
   6 -10  -2    0.05    0.82
  -6  10   2    1.01    0.57
  -6  10   2    0.81    0.64
  -6  10   2    0.34    0.44
   6  10  -2    0.76    0.38
   6  10  -2    0.11    0.63
   5 -10  -2    1.93    0.51
  -5 -10   2    1.69    0.34
  -5 -10   2    1.60    0.41
   5 -10  -2    1.63    0.46
  -5 -10   2    2.77    0.94
   5 -10  -2    2.01    0.41
  -5 -10   2    2.64    0.55
  -5  10   2    2.36    0.85
   5  10  -2    2.46    0.52
  -5  10   2    2.16    0.52
  -5  10   2    1.84    0.47
  -5  10   2    1.19    0.51
   5  10  -2    1.33    0.54
   5  10  -2    1.54    0.39
   4 -10  -2    0.36    0.29
  -4 -10   2    0.25    0.22
  -4 -10   2   -0.06    0.28
  -4 -10   2    0.12    0.29
   4 -10  -2   -0.19    0.34
   4 -10  -2    0.37    0.64
   4 -10  -2    0.14    0.29
   4 -10  -2    0.26    0.35
   4  10  -2   -0.01    0.38
  -4  10   2   -0.31    0.28
  -4  10   2    1.39    0.72
  -4  10   2    0.46    0.38
   4  10  -2   -0.14    0.34
   4  10  -2   -0.02    0.28
  -3 -10   2   -0.10    0.25
   3 -10  -2    0.68    0.33
   3 -10  -2   -0.08    0.21
  -3 -10   2   -0.02    0.20
  -3 -10   2   -0.35    0.20
   3 -10  -2    0.14    0.23
   3 -10  -2    0.08    0.32
   3 -10  -2    0.42    0.46
  -3  10   2    0.24    0.32
  -3  10   2   -0.16    0.48
  -3  10   2    0.21    0.32
   3  10  -2   -0.24    0.18
   3  10  -2   -0.10    0.27
   3  10  -2   -0.12    0.47
  -3  10   2    0.35    0.33
   3  10  -2   -0.23    0.25
   2 -10  -2   -0.08    0.19
  -2 -10   2   -0.12    0.17
  -2 -10   2   -0.08    0.13
   2 -10  -2   -0.12    0.26
   2 -10  -2    0.01    0.17
   2 -10  -2   -0.05    0.21
  -2 -10   2   -0.24    0.39
   2 -10  -2    0.10    0.30
  -2 -10   2   -0.04    0.22
  -2 -10   2   -0.19    0.12
   2  10  -2    0.01    0.12
   2  10  -2   -0.27    0.38
  -2  10   2   -0.01    0.18
   2  10  -2   -0.03    0.23
  -2  10   2   -0.30    0.20
   2  10  -2    0.00    0.09
  -2  10   2   -0.14    0.26
   2  10  -2    0.17    0.22
   1 -10  -2    0.28    0.18
   1 -10  -2    0.72    0.31
  -1 -10   2    0.61    0.22
  -1 -10   2    0.42    0.16
  -1 -10   2    0.72    0.27
   1 -10  -2    0.74    0.30
  -1 -10   2    0.50    0.11
  -1 -10   2    0.72    0.21
   1 -10  -2    0.70    0.19
   1 -10  -2    0.54    0.29
  -1  10   2    0.52    0.31
   1  10  -2    0.51    0.12
   1  10  -2    0.51    0.38
  -1  10   2    0.60    0.21
   1  10  -2    0.82    0.21
   1  10  -2    0.57    0.16
   1  10  -2    0.48    0.24
  -1  10   2    0.55    0.23
  -1  10   2    0.73    0.42
   0 -10  -2    2.26    0.32
   0 -10  -2    2.43    0.48
   0 -10   2    3.44    0.36
   0 -10  -2    3.53    0.40
   0 -10   2    3.02    0.32
   0 -10  -2    2.52    0.54
   0 -10  -2    3.25    0.47
   0 -10   2    3.38    0.46
   0  10  -2    2.70    0.33
   0  10   2    2.83    0.37
   0  10  -2    2.87    0.39
   0  10   2    3.19    0.49
   0  10   2    2.25    0.43
   0  10   2    2.53    0.37
   0  10  -2    2.87    0.35
  -1 -10  -2    3.86    0.52
  -1 -10  -2    4.28    0.41
  -1 -10  -2    3.95    0.41
   1 -10   2    4.67    0.49
   1 -10   2    4.18    0.40
   1 -10   2    3.86    0.43
  -1 -10  -2    4.26    0.50
  -1 -10  -2    4.21    0.39
  -1  10  -2    3.75    0.44
  -1  10  -2    4.12    0.43
   1  10   2    4.37    0.47
  -1  10  -2    3.44    0.39
   1  10   2    3.51    0.40
   1  10   2    4.20    0.56
  -1  10  -2    4.84    0.37
   1  10   2    3.46    0.45
   1  10   2    4.41    0.43
   2 -10   2    1.49    0.36
   2 -10   2    1.77    0.30
   2 -10   2    1.15    0.33
   2 -10   2    1.23    0.25
  -2 -10  -2    1.08    0.34
  -2 -10  -2    1.27    0.26
  -2 -10  -2    1.05    0.27
  -2 -10  -2    1.22    0.29
  -2 -10  -2    1.21    0.39
  -2  10  -2    1.15    0.25
   2  10   2    1.25    0.40
  -2  10  -2    1.46    0.30
  -2  10  -2    1.03    0.24
   2  10   2    1.64    0.37
   2  10   2    1.04    0.27
   2  10   2    0.79    0.33
  -2  10  -2    0.83    0.29
   2  10   2    1.66    0.33
  -3 -10  -2    0.27    0.21
  -3 -10  -2    0.64    0.39
   3 -10   2    0.39    0.20
   3 -10   2    0.27    0.13
  -3 -10  -2    0.31    0.24
   3 -10   2    0.29    0.27
   3 -10   2    0.39    0.37
   3 -10   2    0.24    0.18
  -3 -10  -2    0.09    0.38
  -3 -10  -2    0.53    0.42
  -3  10  -2    0.48    0.47
   3  10   2    0.75    0.32
  -3  10  -2    0.31    0.29
  -3  10  -2    0.15    0.13
   3  10   2    0.51    0.34
   3  10   2    0.42    0.40
   3  10   2    0.08    0.34
  -3  10  -2    0.35    0.35
  -3  10  -2    0.03    0.28
   4 -10   2    0.09    0.15
  -4 -10  -2    0.41    0.26
   4 -10   2    0.08    0.31
   4 -10   2    0.52    0.26
  -4 -10  -2   -0.18    0.51
  -4 -10  -2    0.15    0.29
  -4 -10  -2    0.04    0.50
  -4 -10  -2    0.46    0.25
   4 -10   2    0.40    0.36
  -4 -10  -2    0.04    0.29
   4 -10   2   -0.04    0.38
  -4  10  -2    0.63    0.41
  -4  10  -2   -0.09    0.19
  -4  10  -2   -0.03    0.34
   4  10   2   -0.30    0.41
   4  10   2    0.14    0.30
  -4  10  -2   -0.07    0.39
   4  10   2    0.71    0.54
   4  10   2    0.70    0.46
  -4  10  -2    0.45    0.34
   5 -10   2   -0.19    0.41
   5 -10   2    0.07    0.52
  -5 -10  -2   -0.22    0.50
  -5 -10  -2    0.14    0.30
  -5 -10  -2    0.20    0.27
  -5 -10  -2   -0.83    0.85
  -5 -10  -2   -0.08    0.27
  -5 -10  -2    0.09    0.21
   5 -10   2    0.67    0.61
  -5  10  -2   -0.41    0.45
  -5  10  -2   -0.13    0.27
  -5  10  -2    0.97    0.56
  -5  10  -2    1.26    0.50
   5  10   2    0.92    0.73
   5  10   2    0.36    0.39
   5  10   2    0.63    0.36
  -6 -10  -2    1.65    0.49
  -6 -10  -2   -0.71    0.78
  -6 -10  -2    1.19    0.77
   6 -10   2    0.63    0.48
  -6 -10  -2    0.69    0.25
  -6 -10  -2    1.25    0.29
   6 -10   2    0.69    0.53
   6 -10   2    0.44    0.93
   6 -10   2    0.11    0.33
   6  10   2    1.89    0.68
  -6  10  -2    0.83    0.60
  -6  10  -2    0.87    0.48
  -6  10  -2    2.17    0.72
  -6  10  -2    0.95    0.38
  -6  10  -2    0.56    1.02
   6  10   2    1.19    0.61
   6  10   2    2.91    0.88
  -7 -10  -2    1.04    0.54
   7 -10   2    0.00    0.54
   7 -10   2    0.62    0.59
  -7 -10  -2   -0.32    1.12
  -7  10  -2    0.72    1.00
  -7  10  -2    1.42    0.50
  -7  10  -2    1.40    0.75
   7  10   2   -1.23    1.08
  -7  10  -2   -0.52    0.72
  -7 -11   2    0.38    0.92
  -7 -11   2    1.33    0.63
   7 -11  -2    0.58    1.05
  -7  11   2    0.36    0.76
  -7  11   2    0.51    0.65
  -6 -11   2    3.82    0.65
  -6 -11   2    4.24    0.59
   6 -11  -2    4.76    0.85
   6 -11  -2    4.36    0.82
  -6 -11   2    3.06    0.62
   6 -11  -2    2.54    1.03
  -6  11   2    5.92    1.05
  -6  11   2    3.08    0.69
   5 -11  -2    0.18    0.59
  -5 -11   2    0.52    0.56
   5 -11  -2    0.69    0.49
   5 -11  -2    0.47    0.51
  -5 -11   2    0.41    0.48
   5 -11  -2    0.28    0.40
  -5 -11   2    0.85    0.62
  -5 -11   2    0.97    0.88
  -5  11   2    0.03    0.43
   5  11  -2   -0.41    0.90
  -5  11   2    0.53    0.51
   5  11  -2    1.17    0.43
   5  11  -2    0.75    0.61
  -5  11   2    1.11    0.97
  -5  11   2    0.42    0.45
   5  11  -2    0.46    0.35
  -4 -11   2    2.22    0.46
   4 -11  -2    2.51    0.68
  -4 -11   2    2.28    0.46
  -4 -11   2    2.78    0.55
   4 -11  -2    1.84    0.38
   4 -11  -2    1.96    0.39
   4 -11  -2    2.41    0.52
  -4 -11   2    2.22    0.43
   4  11  -2    2.23    0.67
   4  11  -2    1.56    0.50
  -4  11   2    1.96    0.45
  -4  11   2    2.43    0.45
   4  11  -2    1.85    0.35
   4  11  -2    1.39    0.38
  -4  11   2    2.08    0.57
  -4  11   2    1.97    0.41
  -3 -11   2    0.24    0.33
   3 -11  -2    0.78    0.26
   3 -11  -2   -0.02    0.20
  -3 -11   2    0.69    0.56
   3 -11  -2    0.71    0.27
   3 -11  -2    0.04    0.39
  -3 -11   2    0.40    0.23
  -3 -11   2   -0.25    0.32
   3 -11  -2    0.09    0.35
   3 -11  -2    0.00    0.44
  -3  11   2    0.14    0.31
  -3  11   2    0.67    0.31
   3  11  -2    0.33    0.19
  -3  11   2    0.44    0.67
   3  11  -2    0.35    0.36
  -3  11   2    0.35    0.30
   3  11  -2    0.56    0.48
   2 -11  -2   -0.58    0.31
   2 -11  -2    0.15    0.46
  -2 -11   2    0.11    0.18
  -2 -11   2    0.05    0.42
   2 -11  -2   -0.29    0.18
   2 -11  -2    0.14    0.32
  -2 -11   2   -0.17    0.15
  -2 -11   2    0.04    0.13
   2 -11  -2    0.24    0.29
  -2 -11   2   -0.26    0.22
  -2  11   2   -0.43    0.30
   2  11  -2    0.09    0.13
  -2  11   2    0.07    0.19
  -2  11   2   -0.13    0.32
   2  11  -2    0.72    0.48
   2  11  -2    0.18    0.16
   2  11  -2    0.07    0.22
   1 -11  -2    0.08    0.24
  -1 -11   2   -0.21    0.25
  -1 -11   2    0.25    0.21
   1 -11  -2    0.19    0.28
  -1 -11   2    0.14    0.19
   1 -11  -2   -0.08    0.23
   1 -11  -2    0.26    0.40
   1 -11  -2   -0.15    0.24
  -1 -11   2   -0.02    0.16
  -1 -11   2    0.02    0.10
   1  11  -2    0.01    0.20
  -1  11   2   -0.02    0.18
   1  11  -2    0.13    0.16
  -1  11   2   -0.07    0.32
  -1  11   2   -0.17    0.46
   1  11  -2   -0.30    0.24
  -1  11   2    0.04    0.31
   1  11  -2    0.04    0.22
   0 -11  -2    0.32    0.27
   0 -11   2    0.22    0.20
   0 -11  -2    0.49    0.27
   0 -11   2    0.56    0.36
   0 -11  -2    0.33    0.21
   0 -11   2    0.50    0.19
   0 -11  -2    0.40    0.24
   0 -11  -2   -0.11    0.33
   0  11  -2    0.42    0.29
   0  11   2    0.61    0.23
   0  11   2    0.42    0.39
   0  11  -2    0.44    0.24
   0  11   2    0.17    0.23
   0  11   2    0.14    0.26
   0  11  -2    0.38    0.19
   1 -11   2    5.98    0.53
  -1 -11  -2    7.21    0.67
  -1 -11  -2    6.53    0.65
   1 -11   2    7.09    0.64
   1 -11   2    6.41    0.57
  -1 -11  -2    6.80    0.56
   1 -11   2    6.63    0.55
  -1 -11  -2    6.28    0.56
  -1  11  -2    6.68    0.59
   1  11   2    6.71    0.71
  -1  11  -2    6.35    0.63
   1  11   2    6.38    0.63
  -1  11  -2    7.57    0.56
   1  11   2    6.03    0.52
   1  11   2    6.46    0.61
  -1  11  -2    6.35    0.56
   2 -11   2    0.38    0.33
  -2 -11  -2    0.36    0.22
   2 -11   2    0.46    0.30
  -2 -11  -2    0.36    0.31
  -2 -11  -2    0.21    0.36
  -2 -11  -2   -0.07    0.22
   2 -11   2    0.21    0.32
   2 -11   2    0.05    0.27
  -2 -11  -2   -0.04    0.34
   2  11   2    0.20    0.29
   2  11   2   -0.12    0.22
  -2  11  -2    0.05    0.23
   2  11   2    0.36    0.43
   2  11   2    0.26    0.32
  -2  11  -2    0.44    0.29
  -2  11  -2    0.23    0.25
   3 -11   2    0.92    0.40
   3 -11   2    0.79    0.14
   3 -11   2    1.44    0.34
  -3 -11  -2    0.92    0.27
  -3 -11  -2    1.34    0.51
   3 -11   2    0.80    0.33
  -3 -11  -2    0.94    0.32
  -3 -11  -2    0.42    0.46
   3 -11   2    1.08    0.40
  -3 -11  -2    1.01    0.31
   3  11   2    0.60    0.31
   3  11   2    1.06    0.49
  -3  11  -2    0.70    0.34
   3  11   2    1.35    0.39
  -3  11  -2    0.33    0.27
   3  11   2    1.03    0.39
  -3  11  -2    0.91    0.47
  -3  11  -2    0.64    0.40
   4 -11   2   -0.16    0.39
   4 -11   2   -0.14    0.36
  -4 -11  -2    0.05    0.29
  -4 -11  -2    0.08    0.28
  -4 -11  -2   -0.36    0.31
  -4 -11  -2   -0.48    0.46
   4 -11   2   -0.14    0.27
   4 -11   2    0.58    0.47
  -4 -11  -2   -0.65    0.36
  -4  11  -2   -0.03    0.47
  -4  11  -2    0.30    0.49
   4  11   2   -0.15    0.45
   4  11   2   -0.08    0.28
  -4  11  -2   -0.17    0.18
  -4  11  -2    0.20    0.53
   4  11   2    0.20    0.47
   4  11   2    0.03    0.31
  -5 -11  -2    0.65    0.71
   5 -11   2    0.07    0.37
   5 -11   2    0.49    0.37
  -5 -11  -2   -0.08    0.68
  -5 -11  -2   -0.44    0.60
  -5 -11  -2   -0.33    0.32
  -5 -11  -2    0.22    0.28
   5 -11   2   -0.39    0.24
   5 -11   2    0.50    0.43
  -5 -11  -2    0.01    0.30
   5  11   2    0.90    0.38
  -5  11  -2   -0.05    0.48
  -5  11  -2   -0.75    0.56
   5  11   2   -0.52    0.49
  -5  11  -2   -0.27    0.55
   5  11   2    0.79    0.57
  -5  11  -2    0.53    0.29
   5  11   2   -0.81    0.53
  -6 -11  -2    1.12    0.49
  -6 -11  -2    0.17    0.26
   6 -11   2   -0.28    0.33
  -6 -11  -2   -0.19    0.49
   6 -11   2   -0.38    0.47
  -6 -11  -2   -0.07    0.31
  -6 -11  -2    0.34    0.88
   6 -11   2   -0.14    0.56
   6  11   2    0.88    0.46
  -6  11  -2    0.21    0.59
  -6  11  -2    0.27    0.34
  -6  11  -2    2.25    0.80
   6  11   2    0.30    0.60
  -6  11  -2    0.55    0.48
  -6  11  -2    0.95    0.78
   6  11   2   -0.23    0.87
  -7 -11  -2    5.86    1.11
  -7 -11  -2    6.68    0.88
  -7  11  -2    6.87    0.80
  -7  11  -2    8.83    1.54
   7  11   2    8.51    1.46
   7  11   2    2.52    2.15
  -7 -12   2    0.57    0.64
  -7 -12   2    1.64    0.62
  -7  12   2   -0.10    0.68
  -7  12   2   -0.38    0.78
  -6 -12   2    0.08    0.41
   6 -12  -2    0.32    0.93
  -6 -12   2    1.35    0.70
   6 -12  -2   -0.10    0.83
  -6  12   2    0.35    0.51
  -6  12   2    0.20    0.48
   5 -12  -2    0.23    0.55
  -5 -12   2    0.98    0.57
  -5 -12   2   -0.13    0.41
  -5 -12   2   -0.26    0.60
   5 -12  -2   -0.84    0.73
   5 -12  -2    0.09    0.86
  -5  12   2   -0.76    0.67
  -5  12   2    0.54    0.51
  -5  12   2    0.49    0.50
   5  12  -2   -0.07    0.44
   5  12  -2    0.05    0.36
  -4 -12   2    8.61    1.05
  -4 -12   2    7.45    0.68
  -4 -12   2    8.33    0.83
  -4 -12   2    7.68    0.80
   4 -12  -2    8.18    0.74
   4 -12  -2    8.08    0.93
   4 -12  -2    7.09    0.67
   4 -12  -2    7.57    0.70
   4 -12  -2    8.12    0.83
   4  12  -2    7.04    0.62
   4  12  -2    7.87    0.74
  -4  12   2    7.61    1.19
  -4  12   2    7.70    0.93
  -4  12   2    6.83    0.85
   4  12  -2    7.71    0.76
  -4  12   2    8.66    0.90
   4  12  -2    6.94    0.97
   3 -12  -2   -0.23    0.56
  -3 -12   2    0.05    0.66
   3 -12  -2    0.17    0.30
  -3 -12   2   -0.03    0.38
  -3 -12   2    0.06    0.23
   3 -12  -2   -0.17    0.33
   3 -12  -2    0.01    0.26
   3 -12  -2   -0.15    0.46
  -3  12   2   -0.26    0.50
  -3  12   2   -0.11    0.62
  -3  12   2   -0.37    0.43
  -3  12   2   -0.01    0.28
   3  12  -2   -0.31    0.34
   3  12  -2   -0.07    0.46
   2 -12  -2   -0.27    0.36
  -2 -12   2    0.04    0.27
  -2 -12   2    0.43    0.17
   2 -12  -2    0.17    0.23
  -2 -12   2    0.39    0.40
   2 -12  -2   -0.38    0.35
  -2 -12   2    0.57    0.17
   2 -12  -2    0.40    0.32
   2 -12  -2    0.57    0.29
  -2 -12   2    0.14    0.31
   2 -12  -2    0.47    0.31
   2  12  -2    0.16    0.23
  -2  12   2    0.50    0.37
   2  12  -2    0.44    0.23
   2  12  -2    0.33    0.18
  -2  12   2    0.22    0.27
  -2  12   2    0.58    0.32
   2  12  -2    0.48    0.52
   2  12  -2    0.24    0.15
  -2  12   2    0.04    0.55
   1 -12  -2    0.19    0.33
  -1 -12   2    0.40    0.21
  -1 -12   2    0.55    0.12
  -1 -12   2    0.54    0.23
   1 -12  -2   -0.08    0.32
   1 -12  -2    0.07    0.21
  -1 -12   2    1.48    0.44
  -1 -12   2    0.26    0.18
   1 -12  -2    0.72    0.23
   1  12  -2    1.20    0.45
  -1  12   2    0.48    0.35
   1  12  -2    0.44    0.20
  -1  12   2    0.44    0.51
  -1  12   2    0.39    0.19
   1  12  -2    0.55    0.12
   1  12  -2    0.07    0.24
  -1  12   2   -0.25    0.31
   1  12  -2    0.73    0.30
   0 -12   2    9.72    0.75
   0 -12  -2    9.53    0.72
   0 -12  -2    9.49    0.68
   0 -12   2    9.47    0.74
   0 -12  -2    8.70    0.65
   0 -12  -2    8.63    0.72
   0 -12  -2    9.53    0.83
   0 -12   2    9.81    0.81
   0  12   2    9.28    0.89
   0  12  -2    9.29    0.77
   0  12   2    8.16    0.70
   0  12  -2    9.65    0.73
   0  12  -2   10.07    0.67
   0  12   2    8.29    0.74
   0  12   2    8.73    0.81
   0  12  -2    8.54    0.73
  -1 -12  -2   45.08    2.67
   1 -12   2   43.80    2.61
   1 -12   2   43.68    2.58
   1 -12   2   44.61    2.62
  -1 -12  -2   46.04    2.60
  -1 -12  -2   46.96    2.60
  -1 -12  -2   46.40    2.64
  -1 -12  -2   43.99    2.67
   1 -12   2   47.43    2.66
  -1  12  -2   45.07    2.64
   1  12   2   41.56    2.62
   1  12   2   43.91    2.65
  -1  12  -2   42.03    2.61
   1  12   2   42.10    2.68
   1  12   2   41.68    2.58
   1  12   2   37.20    2.57
  -1  12  -2   43.16    2.66
  -1  12  -2   46.92    2.58
   2 -12   2   19.93    1.37
   2 -12   2   22.09    1.39
   2 -12   2   23.66    1.43
  -2 -12  -2   22.87    1.42
  -2 -12  -2   21.67    1.45
  -2 -12  -2   21.18    1.46
   2 -12   2   21.96    1.40
  -2 -12  -2   25.18    1.37
   2  12   2   18.61    1.36
  -2  12  -2   21.20    1.41
   2  12   2   21.53    1.44
  -2  12  -2   20.42    1.54
   2  12   2   18.73    1.33
   2  12   2   20.36    1.46
   2  12   2   20.91    1.41
  -2  12  -2   22.74    1.38
  -2  12  -2   21.15    1.43
   3 -12   2    1.52    0.14
  -3 -12  -2    1.58    0.53
   3 -12   2    2.29    0.54
  -3 -12  -2    1.67    0.56
  -3 -12  -2    1.53    0.28
   3 -12   2    1.50    0.40
  -3 -12  -2    2.03    0.42
   3 -12   2    1.80    0.50
   3 -12   2    1.77    0.39
  -3 -12  -2    2.17    0.47
  -3  12  -2    1.32    0.42
  -3  12  -2    1.79    0.51
   3  12   2    1.53    0.59
   3  12   2    1.28    0.37
   3  12   2    1.81    0.41
  -3  12  -2    1.87    0.35
  -4 -12  -2    0.07    0.59
  -4 -12  -2   -0.22    0.30
   4 -12   2    0.68    0.60
   4 -12   2    0.51    0.52
   4 -12   2   -0.58    0.39
  -4 -12  -2   -1.55    0.89
   4 -12   2    0.04    0.29
  -4 -12  -2    0.30    0.24
  -4 -12  -2   -0.38    0.46
  -4  12  -2    0.44    0.62
  -4  12  -2    0.18    0.47
   4  12   2   -0.28    0.65
   4  12   2   -0.20    0.44
   4  12   2    0.21    0.51
  -4  12  -2    0.08    0.39
  -4  12  -2   -0.62    0.37
   5 -12   2    2.25    0.48
  -5 -12  -2    2.33    0.81
   5 -12   2    2.36    0.61
  -5 -12  -2    2.36    0.44
  -5 -12  -2    2.33    0.47
  -5 -12  -2    2.62    0.85
  -5 -12  -2    3.05    0.46
   5 -12   2    1.59    0.30
   5 -12   2    1.60    0.75
  -5 -12  -2    2.66    0.51
  -5  12  -2    2.51    0.81
   5  12   2    2.31    0.79
  -5  12  -2    1.97    0.52
   5  12   2    2.74    0.67
   5  12   2    2.76    0.85
  -5  12  -2    2.16    0.75
  -5  12  -2    3.18    0.73
  -5  12  -2    1.77    0.34
   6 -12   2    1.10    0.90
  -6 -12  -2   -0.02    0.51
  -6 -12  -2    0.08    0.95
   6 -12   2    0.27    0.65
  -6 -12  -2    0.52    1.04
  -6 -12  -2    0.03    0.35
  -6 -12  -2    0.54    1.00
  -6  12  -2    0.05    0.36
  -6  12  -2    0.73    0.75
   6  12   2    0.79    0.73
   6  12   2    1.15    0.82
   6  12   2    0.12    0.70
  -6  12  -2    1.13    0.65
  -6  12  -2   -0.30    0.68
  -7 -12  -2    1.99    0.64
   7 -12   2    0.68    0.71
  -7 -12  -2    1.96    0.76
   7 -12   2   -0.13    0.87
  -7  12  -2    0.70    0.55
  -6 -13   2    0.36    0.84
   6 -13  -2    1.27    0.99
  -6 -13   2    0.37    0.48
  -6  13   2    0.76    0.70
  -6  13   2    0.19    0.70
   5 -13  -2    5.40    1.10
  -5 -13   2    5.84    0.91
   5 -13  -2    5.52    1.01
  -5 -13   2    6.79    0.77
  -5 -13   2    4.70    0.94
  -5 -13   2    8.39    1.32
   5 -13  -2    6.94    1.06
   5  13  -2    5.16    0.98
   5  13  -2    5.34    0.75
  -5  13   2    6.60    0.97
  -5  13   2    5.68    0.95
  -5  13   2    5.84    0.77
  -4 -13   2    0.91    0.37
   4 -13  -2    0.64    0.37
   4 -13  -2    0.98    0.59
   4 -13  -2    1.02    0.46
  -4 -13   2    1.22    0.37
  -4 -13   2    1.81    0.93
  -4 -13   2    1.24    0.51
   4 -13  -2    0.75    0.69
   4 -13  -2    2.06    0.70
  -4  13   2    0.94    0.52
  -4  13   2    1.71    0.44
   4  13  -2    0.70    0.38
   4  13  -2    0.41    0.57
   4  13  -2    1.34    0.45
  -4  13   2    1.14    0.65
  -3 -13   2   -0.11    0.64
   3 -13  -2    0.38    0.27
  -3 -13   2    0.13    0.25
   3 -13  -2   -0.22    0.29
   3 -13  -2    0.04    0.50
   3 -13  -2   -0.24    0.43
  -3 -13   2   -0.28    0.37
  -3 -13   2   -0.24    0.28
   3 -13  -2   -0.04    0.31
  -3  13   2   -0.26    0.46
  -3  13   2   -0.38    0.42
   3  13  -2   -0.10    0.38
  -3  13   2    0.05    0.50
   3  13  -2    0.31    0.55
  -3  13   2    0.01    0.39
   3  13  -2   -0.38    0.30
  -2 -13   2   -0.12    0.39
  -2 -13   2    0.11    0.16
  -2 -13   2    0.14    0.19
   2 -13  -2   -0.20    0.25
   2 -13  -2    0.06    0.35
   2 -13  -2    0.60    0.33
   2 -13  -2   -0.01    0.33
  -2 -13   2   -0.59    0.34
   2  13  -2    0.19    0.22
  -2  13   2   -0.34    0.69
   2  13  -2   -0.01    0.16
  -2  13   2   -0.05    0.40
   2  13  -2    0.05    0.17
  -2  13   2   -0.11    0.38
   2  13  -2   -0.35    0.33
   2  13  -2   -0.10    0.35
  -2  13   2    0.20    0.35
  -1 -13   2   12.57    0.85
   1 -13  -2   11.50    0.82
  -1 -13   2   13.42    1.02
   1 -13  -2   12.01    0.99
  -1 -13   2   10.08    0.69
   1 -13  -2   12.44    0.93
  -1 -13   2   10.60    0.77
   1 -13  -2   10.47    0.88
   1 -13  -2   11.69    1.00
  -1  13   2   11.76    0.94
   1  13  -2    9.65    0.68
  -1  13   2   11.55    0.84
  -1  13   2   10.50    1.06
   1  13  -2   10.99    0.90
   1  13  -2   11.98    0.97
  -1  13   2   11.37    0.84
   1  13  -2   12.97    0.77
   1  13  -2   11.25    0.88
   0 -13  -2    5.83    0.61
   0 -13   2    6.43    0.63
   0 -13  -2    6.58    0.55
   0 -13  -2    6.45    0.67
   0 -13   2    5.55    0.64
   0 -13   2    7.44    0.76
   0 -13  -2    6.23    0.63
   0 -13  -2    5.65    0.94
   0 -13   2    6.05    0.63
   0  13   2    5.18    0.59
   0  13  -2    7.56    0.74
   0  13   2    4.94    0.68
   0  13  -2    7.24    0.53
   0  13  -2    6.00    0.67
   0  13  -2    6.34    0.62
   0  13   2    6.00    0.65
   0  13   2    5.60    0.77
  -1 -13  -2   13.57    1.19
  -1 -13  -2   16.31    1.08
   1 -13   2   15.60    1.07
   1 -13   2   15.35    1.07
  -1 -13  -2   16.75    1.07
  -1 -13  -2   15.88    1.03
   1 -13   2   13.99    1.03
  -1 -13  -2   16.62    1.19
   1 -13   2   15.93    1.10
   1  13   2   13.99    1.09
  -1  13  -2   14.35    1.11
  -1  13  -2   16.01    1.20
   1  13   2   14.98    1.12
  -1  13  -2   15.52    1.14
  -1  13  -2   16.92    1.05
   1  13   2   15.00    1.02
   1  13   2   13.65    1.07
  -2 -13  -2   23.19    1.52
   2 -13   2   24.54    1.54
   2 -13   2   22.89    1.52
  -2 -13  -2   25.86    1.45
  -2 -13  -2   19.97    1.67
  -2 -13  -2   24.14    1.59
  -2 -13  -2   24.84    1.48
   2 -13   2   25.12    1.52
   2 -13   2   21.58    1.48
   2  13   2   22.44    1.56
  -2  13  -2   24.59    1.51
   2  13   2   21.60    1.45
   2  13   2   22.90    1.53
  -2  13  -2   21.43    1.51
  -2  13  -2   24.18    1.48
   2  13   2   20.88    1.52
  -2  13  -2   22.46    1.58
  -3 -13  -2    3.18    0.56
   3 -13   2    2.84    0.56
   3 -13   2    1.94    0.46
  -3 -13  -2    2.40    1.09
   3 -13   2    3.09    0.60
   3 -13   2    2.54    0.61
  -3 -13  -2    2.13    0.46
  -3 -13  -2    2.43    0.72
  -3  13  -2    2.29    0.45
   3  13   2    2.59    0.44
  -3  13  -2    2.15    0.53
  -3  13  -2    2.38    0.52
   3  13   2    2.22    0.46
  -3  13  -2    2.92    0.46
   3  13   2    2.09    0.45
   4 -13   2    0.01    0.19
  -4 -13  -2    0.57    0.64
   4 -13   2   -0.22    0.44
  -4 -13  -2   -0.94    0.66
   4 -13   2    0.29    0.47
   4 -13   2    0.42    0.89
  -4 -13  -2   -0.35    0.27
  -4 -13  -2    0.36    0.64
   4  13   2    0.70    0.56
   4  13   2   -0.31    0.42
   4  13   2   -0.37    0.47
  -4  13  -2   -0.34    0.45
  -4  13  -2   -0.75    0.63
   4  13   2   -0.76    0.43
  -5 -13  -2   -0.72    0.43
  -5 -13  -2    0.64    0.32
   5 -13   2   -0.34    0.85
  -5 -13  -2   -0.15    0.82
  -5 -13  -2   -0.02    0.28
  -5 -13  -2    0.71    0.80
   5 -13   2   -0.26    0.70
   5 -13   2   -0.12    0.36
  -5 -13  -2   -0.38    0.56
   5 -13   2   -0.40    0.26
  -5  13  -2   -0.48    0.49
   5  13   2    0.69    0.82
  -5  13  -2    0.43    0.61
  -5  13  -2   -0.24    0.85
   5  13   2   -0.42    0.70
  -5  13  -2    0.87    0.68
   5  13   2    0.52    0.58
  -6 -13  -2    2.34    0.95
   6 -13   2    0.07    0.52
   6 -13   2   -0.30    0.67
  -6 -13  -2   -0.52    0.50
  -6 -13  -2   -0.78    1.13
  -6  13  -2    0.30    0.47
   6  13   2    1.65    0.88
  -6  13  -2    0.31    1.06
  -6  13  -2    1.44    0.73
  -6 -14   2    2.49    0.70
  -6 -14   2    1.71    0.55
   6 -14  -2    3.48    0.83
  -6 -14   2    1.31    1.30
  -6  14   2    1.44    0.69
  -6  14   2    2.01    0.84
   5 -14  -2    4.78    0.67
   5 -14  -2    2.65    0.99
   5 -14  -2    4.64    1.17
  -5 -14   2    6.79    1.43
   5 -14  -2    2.87    0.73
  -5 -14   2    5.74    0.80
  -5 -14   2    4.55    0.87
  -5 -14   2    4.29    0.72
  -5  14   2    3.29    0.92
  -5  14   2    5.03    1.01
  -5  14   2    4.85    0.90
  -4 -14   2    4.48    1.10
   4 -14  -2    3.87    0.90
  -4 -14   2    2.47    0.65
  -4 -14   2    3.46    0.57
  -4 -14   2    3.24    0.57
   4 -14  -2    4.21    0.84
   4 -14  -2    3.24    0.58
   4 -14  -2    4.31    0.75
  -4  14   2    3.05    0.64
  -4  14   2    3.98    0.79
   4  14  -2    2.20    0.52
  -4  14   2    4.04    0.86
   3 -14  -2   -0.65    0.38
  -3 -14   2   -0.32    0.25
  -3 -14   2   -0.50    0.30
  -3 -14   2    0.29    0.35
   3 -14  -2   -0.14    0.35
   3 -14  -2   -0.33    0.51
  -3 -14   2   -0.43    0.57
   3 -14  -2    0.18    0.61
   3 -14  -2    0.02    0.38
  -3  14   2    0.02    0.32
   3  14  -2   -0.08    0.48
  -3  14   2    0.05    0.48
  -3  14   2    0.45    0.48
   3  14  -2   -0.62    0.33
   3  14  -2   -0.17    0.63
  -3  14   2    0.23    0.56
  -2 -14   2    0.42    0.21
  -2 -14   2   -0.14    0.16
   2 -14  -2   -0.02    0.24
   2 -14  -2    0.10    0.37
  -2 -14   2   -0.14    0.30
   2 -14  -2    0.04    0.30
  -2 -14   2   -0.24    0.40
   2 -14  -2    0.04    0.48
  -2 -14   2    0.18    0.42
   2  14  -2    0.22    0.19
  -2  14   2   -0.45    0.79
   2  14  -2   -0.20    0.21
  -2  14   2    0.07    0.37
   2  14  -2   -0.19    0.24
  -2  14   2   -0.27    0.35
   2  14  -2    0.64    0.50
   2  14  -2    0.10    0.26
   1 -14  -2    3.10    0.56
   1 -14  -2    2.17    0.52
   1 -14  -2    3.07    0.65
   1 -14  -2    2.61    0.46
   1 -14  -2    3.24    0.59
  -1 -14   2    2.10    0.40
   1  14  -2    2.32    0.48
  -1  14   2    2.02    0.54
   1  14  -2    2.03    0.48
   1  14  -2    3.57    0.75
  -1  14   2    2.13    0.43
  -1  14   2    3.12    0.44
   1  14  -2    3.04    0.41
  -1  14   2    2.33    0.67
   0 -14  -2    0.30    0.31
   0 -14  -2    0.47    0.38
   0 -14   2    0.95    0.30
   0 -14  -2    0.68    0.43
   0 -14  -2    0.73    0.50
   0 -14   2   -0.13    0.26
   0 -14   2    1.05    0.56
   0 -14   2    0.09    0.34
   0  14   2    0.41    0.41
   0  14  -2    0.82    0.41
   0  14   2    0.43    0.31
   0  14   2    0.37    0.32
   0  14  -2    1.31    0.54
   0  14  -2    0.30    0.35
   0  14  -2    0.41    0.28
   0  14   2    0.39    0.30
  -1 -14  -2    1.41    0.36
   1 -14   2    0.57    0.29
  -1 -14  -2    0.58    0.58
  -1 -14  -2    0.93    0.26
  -1 -14  -2    0.52    0.37
   1 -14   2    0.75    0.32
   1 -14   2    1.15    0.37
   1 -14   2    0.69    0.35
  -1 -14  -2    0.73    0.41
   1  14   2    1.19    0.49
  -1  14  -2    0.78    0.49
   1  14   2    0.56    0.31
   1  14   2    0.81    0.32
  -1  14  -2    0.94    0.25
   1  14   2    0.67    0.38
  -1  14  -2    0.18    0.39
   1  14   2    0.67    0.37
   2 -14   2    6.18    0.69
   2 -14   2    6.35    0.73
  -2 -14  -2    6.28    0.56
  -2 -14  -2    7.10    0.65
  -2 -14  -2    7.03    0.82
  -2 -14  -2    7.90    0.90
  -2 -14  -2    6.29    0.55
   2 -14   2    6.00    0.60
   2  14   2    4.76    0.66
  -2  14  -2    6.32    0.63
   2  14   2    4.85    0.62
   2  14   2    6.05    0.60
   2  14   2    5.97    0.68
  -2  14  -2    5.91    0.87
   3 -14   2    0.95    0.61
  -3 -14  -2    0.92    0.30
   3 -14   2    1.08    0.46
   3 -14   2    1.40    0.46
  -3 -14  -2    1.16    0.29
   3 -14   2    2.11    0.57
  -3 -14  -2    1.59    0.66
  -3 -14  -2    1.06    0.33
  -3  14  -2    1.42    0.55
   3  14   2    1.64    0.67
  -3  14  -2    1.55    0.50
   3  14   2    1.22    0.50
  -3  14  -2    1.39    0.53
  -3  14  -2    0.48    0.34
   3  14   2    1.37    0.67
  -4 -14  -2    1.13    0.57
   4 -14   2    0.85    1.04
   4 -14   2    0.64    0.15
  -4 -14  -2    0.20    0.40
  -4 -14  -2    0.20    0.76
   4 -14   2    1.10    0.39
   4 -14   2    0.65    0.46
  -4 -14  -2    0.90    0.41
  -4 -14  -2    1.35    0.81
   4  14   2    0.74    0.50
  -4  14  -2    0.53    0.52
  -4  14  -2   -0.08    0.60
   4  14   2    0.02    0.76
   4  14   2    0.95    0.70
  -4  14  -2   -0.07    0.65
  -5 -14  -2    2.72    0.85
  -5 -14  -2    1.24    0.39
   5 -14   2    1.09    0.55
   5 -14   2    0.83    0.80
  -5 -14  -2    0.30    0.94
  -5 -14  -2    2.02    0.62
  -5  14  -2    0.32    0.44
  -5  14  -2    1.96    0.50
  -5  14  -2    0.70    0.66
   5  14   2    1.90    0.46
   5  14   2   -0.12    0.63
  -6 -14  -2   -0.07    0.53
   6 -14   2    3.26    1.08
  -6 -14  -2    1.45    1.00
   6 -14   2    1.12    0.49
  -6  14  -2   -0.22    0.74
   6  14   2    1.76    1.24
   6 -15  -2   -1.64    1.26
  -6 -15   2    1.09    0.55
  -6 -15   2   -3.55    2.20
  -6  15   2    2.36    1.02
  -5 -15   2    3.20    1.41
   5 -15  -2    1.01    0.86
  -5 -15   2    0.29    0.80
   5 -15  -2    0.45    0.63
   5 -15  -2    1.10    0.61
   5 -15  -2    2.42    0.63
  -5 -15   2    1.07    0.45
  -5  15   2    2.05    0.58
  -5  15   2    1.26    0.76
  -4 -15   2    5.58    0.86
   4 -15  -2    5.37    0.66
  -4 -15   2    6.21    1.20
   4 -15  -2    5.87    0.88
   4 -15  -2    5.19    1.04
   4 -15  -2    5.90    0.80
  -4 -15   2    5.85    0.66
  -4 -15   2    5.64    0.98
  -4  15   2    4.63    0.94
  -4  15   2    6.24    1.14
   4  15  -2    6.87    1.01
   4  15  -2    5.74    0.80
  -4  15   2    5.27    0.90
  -3 -15   2    0.01    0.27
   3 -15  -2   -0.98    0.75
   3 -15  -2   -0.30    0.37
   3 -15  -2   -0.03    0.33
   3 -15  -2    0.31    0.72
  -3 -15   2    0.43    0.53
  -3 -15   2   -0.21    0.37
   3 -15  -2   -0.65    0.54
  -3 -15   2   -0.31    0.38
  -3  15   2    0.19    0.65
  -3  15   2   -0.09    0.32
  -3  15   2   -0.10    0.54
   2 -15  -2    0.80    0.32
   2 -15  -2    1.14    0.36
   2 -15  -2   -0.32    0.47
   2 -15  -2    0.39    0.50
  -2 -15   2    0.49    0.51
  -2 -15   2    0.69    0.49
  -2 -15   2    0.47    0.19
   2 -15  -2    0.11    0.73
   2 -15  -2    0.19    0.33
   2  15  -2    0.23    0.65
   2  15  -2    0.76    0.21
   2  15  -2    1.15    0.43
  -2  15   2    0.82    0.42
  -2  15   2    0.07    0.30
  -2  15   2    0.50    0.48
   2  15  -2    0.28    0.26
   2  15  -2    0.17    0.51
  -1 -15   2    0.50    0.39
   1 -15  -2    0.18    0.48
   1 -15  -2    0.84    0.42
   1 -15  -2    0.27    0.30
   1 -15  -2    0.31    0.66
   1 -15  -2    0.04    0.27
  -1 -15   2    0.45    0.52
  -1 -15   2    1.11    0.65
  -1 -15   2    0.11    0.34
   1 -15  -2    0.32    0.38
   1  15  -2    0.24    0.27
  -1  15   2   -0.01    0.31
   1  15  -2    0.38    0.47
  -1  15   2   -0.07    0.26
   1  15  -2   -0.11    0.33
   1  15  -2    0.11    0.56
  -1  15   2   -0.17    0.39
   0 -15  -2    0.46    0.56
   0 -15  -2    0.19    0.27
   0 -15   2    0.53    0.33
   0 -15   2    0.24    0.43
   0 -15   2    0.63    0.61
   0 -15  -2   -0.52    0.38
   0 -15   2    0.20    0.42
   0 -15  -2    0.18    0.60
   0 -15  -2   -0.48    0.39
   0  15  -2   -0.03    0.37
   0  15   2    0.05    0.50
   0  15  -2    0.47    0.28
   0  15   2   -0.31    0.44
   0  15  -2    0.54    0.26
   0  15  -2    0.02    0.20
   0  15   2   -0.07    0.36
   0  15   2    0.26    0.51
  -1 -15  -2    3.83    0.45
   1 -15   2    3.13    0.56
   1 -15   2    4.89    0.73
  -1 -15  -2    3.84    0.62
   1 -15   2    3.67    0.52
  -1 -15  -2    3.57    0.71
  -1 -15  -2    2.67    0.56
  -1 -15  -2    3.95    0.77
   1 -15   2    4.62    0.61
   1  15   2    3.20    0.48
   1  15   2    3.39    0.56
  -1  15  -2    4.19    0.80
  -1  15  -2    3.48    0.59
  -1  15  -2    2.82    0.58
   1  15   2    2.66    0.84
   1  15   2    4.11    0.62
  -1  15  -2    4.44    0.73
   1  15   2    4.46    0.57
  -2 -15  -2    1.60    0.47
   2 -15   2    0.03    0.42
  -2 -15  -2    0.47    0.34
  -2 -15  -2    1.20    0.65
   2 -15   2    0.86    0.50
  -2 -15  -2    0.52    0.30
  -2 -15  -2    0.91    0.34
   2 -15   2    0.47    0.47
   2 -15   2    0.67    0.48
  -2  15  -2    0.67    0.38
   2  15   2    0.75    0.34
   2  15   2    0.46    0.42
  -2  15  -2    0.82    0.60
  -2  15  -2    0.91    0.50
   2  15   2   -0.02    0.43
  -2  15  -2   -0.12    0.69
   2  15   2    0.77    0.42
   2  15   2   -0.16    0.62
  -3 -15  -2   -0.55    0.73
  -3 -15  -2    0.36    0.35
  -3 -15  -2    0.56    0.66
   3 -15   2   -0.34    0.49
   3 -15   2    0.28    0.57
   3 -15   2    0.86    0.59
  -3  15  -2    0.35    0.58
  -3  15  -2    0.05    0.40
  -3  15  -2   -0.19    0.29
  -3  15  -2    0.59    0.67
  -4 -15  -2   -0.09    0.72
  -4 -15  -2   -0.18    0.81
  -4 -15  -2    0.73    0.49
   4 -15   2   -0.81    0.66
   4 -15   2   -0.01    0.65
  -4 -15  -2    0.20    0.85
   4 -15   2   -0.40    0.47
  -4  15  -2    0.14    0.38
   4  15   2    0.78    0.68
  -4  15  -2    0.19    0.43
   4  15   2    0.46    0.50
   4  15   2   -0.08    0.82
  -5 -15  -2   -1.25    0.88
   5 -15   2    0.84    0.79
   5 -15   2   -0.05    0.54
  -5 -15  -2    2.22    0.80
  -5 -15  -2    0.85    0.66
  -5  15  -2    1.44    0.70
  -5  15  -2    0.48    0.72
  -5  15  -2   -0.36    0.68
   5  15   2    1.51    0.73
  -5 -16   2    1.93    0.72
   5 -16  -2    0.16    0.55
   5 -16  -2    0.86    0.63
  -5 -16   2    0.65    0.48
  -5 -16   2    2.02    1.37
  -5  16   2    0.04    0.67
  -5  16   2   -0.71    0.64
  -4 -16   2    4.09    0.62
   4 -16  -2    4.80    1.18
   4 -16  -2    5.12    0.89
   4 -16  -2    3.68    1.08
  -4 -16   2    4.31    0.86
   4 -16  -2    2.68    1.04
   4 -16  -2    5.85    1.09
  -4 -16   2    6.58    1.14
  -4  16   2    5.64    0.99
   4  16  -2    5.55    0.69
  -4  16   2    5.07    0.74
   3 -16  -2   -0.76    0.75
   3 -16  -2    0.40    0.49
   3 -16  -2    0.66    0.58
  -3 -16   2    0.40    0.27
  -3 -16   2   -0.69    0.46
  -3 -16   2    1.43    0.63
   3 -16  -2    0.25    0.43
  -3  16   2    0.51    1.11
  -3  16   2    0.11    0.52
  -2 -16   2    0.08    0.19
   2 -16  -2    0.90    0.53
   2 -16  -2   -0.02    0.39
   2 -16  -2   -0.36    0.35
  -2 -16   2   -0.16    0.50
  -2 -16   2    0.71    0.29
  -2 -16   2   -0.19    0.53
   2 -16  -2   -0.31    0.32
  -2  16   2    0.38    0.60
   2  16  -2    0.45    0.26
  -2  16   2   -0.66    0.39
   2  16  -2    0.32    0.23
   2  16  -2    0.92    0.38
  -2  16   2    0.10    0.34
   2  16  -2   -0.01    0.63
  -1 -16   2    1.40    0.71
   1 -16  -2   -0.04    0.36
   1 -16  -2    0.40    0.69
  -1 -16   2    0.46    0.35
  -1 -16   2    0.75    0.36
  -1 -16   2    0.81    0.52
   1 -16  -2    1.81    0.60
   1 -16  -2    0.31    0.28
  -1  16   2   -0.26    0.33
   1  16  -2    0.06    0.28
   1  16  -2    0.07    0.58
  -1  16   2    0.06    0.29
   1  16  -2    0.06    0.32
   0 -16   2    0.47    0.56
   0 -16  -2    0.90    0.68
   0 -16  -2    0.84    0.37
   0 -16  -2    0.74    0.46
   0 -16   2    0.53    0.36
   0 -16  -2    0.71    0.48
   0 -16  -2    0.20    0.43
   0 -16   2    0.74    0.53
   0 -16   2    1.15    0.69
   0  16  -2    0.07    0.43
   0  16   2    0.49    0.53
   0  16  -2    1.01    0.31
   0  16   2    0.50    0.60
   0  16  -2    0.45    0.38
   0  16   2    0.65    0.66
  -1 -16  -2    3.99    0.74
   1 -16   2    5.38    0.66
   1 -16   2    4.20    0.74
   1 -16   2    4.53    0.62
  -1 -16  -2    4.77    0.91
   1 -16   2    4.85    0.61
  -1 -16  -2    3.65    0.67
  -1 -16  -2    2.90    0.65
  -1 -16  -2    4.47    0.51
   1  16   2    4.60    0.68
   1  16   2    3.19    0.55
   1  16   2    2.97    0.51
   1  16   2    4.66    0.62
  -1  16  -2    3.33    0.82
  -1  16  -2    3.48    0.59
  -1  16  -2    2.43    0.71
   2 -16   2    0.80    0.46
  -2 -16  -2    1.96    0.46
   2 -16   2    2.76    0.88
  -2 -16  -2    1.16    0.54
  -2 -16  -2    1.04    0.46
   2 -16   2    0.89    0.57
  -2 -16  -2    1.28    0.44
   2 -16   2    2.38    0.60
   2  16   2    0.98    0.56
  -2  16  -2    1.50    0.92
  -2  16  -2    1.32    0.61
  -2  16  -2    0.85    0.70
  -2  16  -2    1.62    0.51
   2  16   2    1.29    0.44
   2  16   2    1.61    0.40
   2  16   2    2.09    0.53
   3 -16   2    1.28    0.70
  -3 -16  -2    1.59    0.54
  -3 -16  -2    1.32    0.84
  -3 -16  -2    0.76    0.57
   3 -16   2    1.55    0.51
  -3 -16  -2    0.98    0.38
   3 -16   2    0.42    0.53
  -3  16  -2    0.64    0.82
   3  16   2    0.11    0.50
  -3  16  -2   -0.07    0.57
   3  16   2   -0.08    0.47
  -3  16  -2    0.98    0.41
  -3  16  -2    0.97    0.50
   4 -16   2   -0.48    0.58
  -4 -16  -2    0.62    0.98
  -4 -16  -2   -0.42    0.68
  -4 -16  -2    0.33    0.58
   4 -16   2    1.16    0.72
  -4 -16  -2    2.65    0.93
  -4  16  -2   -0.07    0.86
  -4  16  -2   -0.31    0.65
   4  16   2   -1.13    0.91
   4  16   2   -0.45    0.81
  -4  16  -2    0.91    0.61
  -5 -16  -2    1.12    0.67
  -5 -16  -2    1.22    1.09
   5 -16   2    0.15    0.87
   5 -16   2    0.30    0.95
  -5  16  -2    0.00    0.70
   5 -17  -2    1.22    0.64
  -5 -17   2    0.74    0.51
  -5  17   2   -0.51    0.98
  -4 -17   2    1.87    0.74
  -4 -17   2    0.33    0.38
  -4 -17   2   -1.32    0.77
   4 -17  -2    0.64    0.46
   4 -17  -2    0.18    0.73
   4 -17  -2    0.16    0.61
   4 -17  -2   -0.36    1.13
  -4  17   2    1.21    0.52
  -4  17   2   -0.21    0.88
   3 -17  -2    0.41    0.93
   3 -17  -2   -0.19    0.85
   3 -17  -2   -0.53    0.75
  -3 -17   2   -0.17    0.54
   3 -17  -2    0.59    0.53
  -3 -17   2    0.63    0.28
   3 -17  -2    1.31    0.44
  -3  17   2    1.09    0.89
  -3  17   2   -0.37    0.43
  -3  17   2   -0.10    0.64
   2 -17  -2   -0.68    0.87
  -2 -17   2    0.66    0.35
  -2 -17   2    0.47    0.55
   2 -17  -2    0.72    0.48
   2 -17  -2    0.63    0.69
  -2 -17   2    0.19    0.64
   2 -17  -2   -0.27    0.34
  -2 -17   2    0.34    0.21
  -2 -17   2   -0.43    0.59
   2 -17  -2    0.39    0.73
   2  17  -2    0.75    0.51
  -2  17   2    0.12    0.39
  -2  17   2    0.59    0.57
   2  17  -2   -0.07    0.23
   2  17  -2    0.85    0.30
  -2  17   2    0.34    0.38
   1 -17  -2    0.27    0.36
  -1 -17   2    0.66    0.53
   1 -17  -2    2.56    0.76
   1 -17  -2    0.94    0.44
  -1 -17   2    0.58    0.39
  -1 -17   2    1.07    0.60
  -1 -17   2    0.91    0.60
   1 -17  -2   -0.18    0.64
   1 -17  -2    0.30    0.51
   1 -17  -2   -0.86    0.65
  -1  17   2    0.75    0.34
  -1  17   2   -0.09    0.67
   1  17  -2    0.79    0.33
  -1  17   2    0.41    0.76
   1  17  -2   -0.10    0.44
   0 -17   2    0.88    0.66
   0 -17   2    1.15    0.44
   0 -17   2    0.72    0.39
   0 -17  -2    0.50    0.80
   0 -17  -2    1.03    0.46
   0 -17  -2    1.09    0.44
   0 -17   2   -0.26    0.53
   0 -17  -2    2.09    0.72
   0  17  -2    1.48    0.66
   0  17   2    0.82    0.49
   0  17   2    0.76    0.55
   0  17  -2    1.10    0.40
   0  17   2    0.80    0.62
  -1 -17  -2    1.56    0.47
  -1 -17  -2    1.08    0.60
   1 -17   2    1.58    0.55
   1 -17   2    0.63    0.47
   1 -17   2    1.69    0.62
  -1 -17  -2    1.75    0.47
  -1 -17  -2    1.85    0.54
  -1 -17  -2    0.74    0.36
  -1  17  -2    1.00    0.49
  -1  17  -2    0.20    0.61
  -1  17  -2    0.98    0.62
   1  17   2    0.98    0.73
  -2 -17  -2    0.93    0.50
  -2 -17  -2    1.93    0.56
  -2 -17  -2    1.37    0.42
  -2 -17  -2    0.94    0.45
   2 -17   2    1.16    0.62
   2 -17   2    2.05    0.76
  -2 -17  -2   -0.32    0.58
   2 -17   2    1.18    0.47
  -2  17  -2    0.46    0.35
   2  17   2    0.43    0.47
   2  17   2    1.58    0.56
   2  17   2    1.22    0.75
  -2  17  -2    0.69    0.66
   2  17   2    0.91    0.42
  -3 -17  -2    1.46    0.45
  -3 -17  -2    1.58    0.90
  -3 -17  -2    0.44    0.41
   3 -17   2    2.29    0.69
   3 -17   2    0.72    0.51
  -3  17  -2    1.37    0.42
  -3  17  -2    0.84    0.76
   3  17   2    1.19    0.64
   3  17   2    0.88    0.89
  -4 -17  -2    0.34    0.56
  -4 -17  -2    0.28    0.70
   4 -17   2    2.12    0.87
   4 -17   2   -0.02    0.69
  -4 -17  -2    1.49    1.18
  -4  17  -2    1.11    0.47
   4  17   2   -0.88    0.96
   4  17   2    0.87    1.01
   4 -18  -2   -1.52    1.19
  -4 -18   2   -0.98    0.88
  -4  18   2    0.82    1.04
  -4  18   2    0.97    0.75
   3 -18  -2    1.34    0.80
   3 -18  -2    1.66    0.66
  -3 -18   2    1.15    0.63
   3 -18  -2    1.74    0.47
  -3  18   2    1.50    0.75
  -3  18   2    1.11    0.74
  -2 -18   2    0.85    0.59
   2 -18  -2    0.78    0.49
  -2 -18   2    0.07    0.63
   2 -18  -2   -0.02    0.59
   2 -18  -2    0.02    0.91
   2 -18  -2   -0.25    0.37
   2  18  -2    0.58    0.28
  -2  18   2    1.11    0.73
  -2  18   2    0.62    0.44
  -2  18   2    0.48    0.79
  -1 -18   2   -0.21    0.49
   1 -18  -2    0.01    0.35
  -1 -18   2   -0.06    1.01
  -1 -18   2    1.11    0.65
   1 -18  -2    0.92    0.48
   1 -18  -2   -0.57    0.87
  -1 -18   2    0.30    0.42
   1  18  -2   -0.51    0.37
   1  18  -2    0.18    0.72
  -1  18   2   -0.28    0.42
  -1  18   2    0.29    0.50
   0 -18  -2    2.09    0.76
   0 -18   2    0.53    0.52
   0 -18   2   -0.36    0.38
   0 -18  -2    1.24    0.63
   0 -18  -2    0.58    0.80
   0 -18  -2   -0.30    0.40
   0 -18   2    0.29    0.58
   0 -18   2   -0.04    0.54
   0  18   2    0.15    0.88
   0  18   2    0.00    0.46
   0  18  -2    0.06    0.48
   0  18   2    0.83    0.57
  -1 -18  -2   -0.44    0.50
   1 -18   2    0.49    0.56
  -1 -18  -2    1.54    0.89
  -1 -18  -2   -0.31    0.41
  -1 -18  -2    1.42    0.72
   1 -18   2   -0.20    0.53
   1 -18   2    0.44    0.49
  -1 -18  -2   -0.15    0.63
  -1  18  -2    0.10    0.34
  -1  18  -2   -0.84    0.64
   1  18   2    1.00    0.48
   1  18   2   -0.25    0.42
   1  18   2    0.70    0.48
   2 -18   2    1.11    0.80
  -2 -18  -2    0.47    0.54
   2 -18   2    0.11    0.54
  -2 -18  -2   -0.42    0.99
  -2 -18  -2    0.58    0.62
   2  18   2   -1.22    0.79
   2  18   2    0.00    0.60
   2  18   2    0.09    0.56
  -2  18  -2   -0.78    0.66
  -2  18  -2   -0.11    0.61
  -3 -18  -2   -0.21    0.40
  -3 -18  -2    2.31    0.81
   3 -18   2    1.49    0.85
   3  18   2    2.60    0.79
   4 -18   2    1.82    0.72
  -4 -18  -2    1.87    0.83
  -4 -18  -2   -0.57    1.25
  -4  18  -2    1.33    0.53
   3 -19  -2    3.30    0.97
  -2 -19   2    0.34    0.54
  -2 -19   2    0.60    0.67
   2 -19  -2   -1.52    1.14
  -2  19   2    1.50    0.55
   1 -19  -2    1.47    0.86
  -1 -19   2    1.90    0.73
   1 -19  -2    1.06    0.96
  -1 -19   2   -0.06    0.50
   1 -19  -2    0.48    0.51
   1 -19  -2    0.51    0.77
   1  19  -2   -0.75    0.60
  -1  19   2   -0.15    0.48
  -1  19   2   -0.23    0.46
   0 -19   2    0.68    0.74
   0 -19  -2    0.73    0.61
   0 -19  -2    0.08    0.93
   0 -19   2    0.25    0.40
   0 -19  -2    0.02    0.79
   0 -19   2    0.12    0.78
   0  19   2    0.16    0.83
   0  19  -2   -0.16    0.45
   0  19   2    0.14    0.44
   0  19   2    0.82    0.57
  -1 -19  -2    0.28    0.53
  -1 -19  -2    0.82    0.43
  -1 -19  -2   -1.11    1.13
   1 -19   2    1.65    0.67
  -1 -19  -2    2.49    1.11
   1 -19   2    2.55    0.90
   1  19   2    1.54    0.59
   1  19   2    0.93    0.58
   1  19   2    1.66    0.86
  -1  19  -2    1.21    0.63
  -2 -19  -2    2.06    0.72
  -2 -19  -2    0.51    0.78
   2 -19   2    1.25    0.55
   2 -19   2    0.47    0.64
   2  19   2   -0.40    0.56
   2  19   2    0.75    0.79
   2  19   2    1.31    0.54
  -2  19  -2    0.01    0.44
   3 -19   2   -0.34    0.85
  -3 -19  -2    0.26    0.73
   3 -19   2    1.30    1.07
  -3  19  -2    0.31    0.82
   2 -20  -2    1.61    1.54
  -2 -20   2    3.28    1.15
  -2 -20   2    2.28    0.63
  -2  20   2    0.53    0.71
  -1 -20   2   -0.27    0.66
   1 -20  -2    0.51    0.59
   1 -20  -2   -1.80    1.04
  -1  20   2   -0.19    0.84
  -1  20   2    0.30    0.65
   0 -20  -2   -0.17    1.03
   0 -20   2    2.72    1.07
   0 -20   2    2.09    0.67
   0  20   2    0.55    0.64
   0  20   2    0.06    0.94
   0  20  -2   -0.31    0.57
  -1 -20  -2    1.03    0.80
   1 -20   2    1.70    1.01
  -1 -20  -2    1.18    0.52
  -1 -20  -2    0.95    1.07
   1 -20   2    1.37    1.19
   1  20   2    1.79    0.73
  -2 -20  -2    2.82    1.04
  -2 -20  -2   -0.41    1.03
   2 -20   2    0.00    0.90
  -2  20  -2    0.61    0.75
   2  20   2    1.10    0.75
   2  20   2    0.44    0.62
  -8   0   3    0.79    0.44
  -8   0   3    0.03    0.52
   8   0  -3    0.61    0.73
  -8   0   3    0.00    0.51
  -7   0   3    0.22    0.47
  -7   0   3    0.08    0.34
  -7   0   3   -0.65    0.40
   7   0  -3   -0.51    0.36
   7   0  -3   -0.57    0.61
  -7   0   3   -0.30    0.44
   7   0  -3   -1.70    1.05
  -6   0   3    0.07    0.37
   6   0  -3    0.62    0.43
   6   0  -3    0.16    0.44
   6   0  -3   -0.46    0.45
   6   0  -3   -0.32    0.46
   6   0  -3   -0.08    0.22
  -6   0   3   -0.10    0.35
  -6   0   3   -0.23    0.26
  -6   0   3   -0.16    0.26
   6   0  -3    0.16    0.34
   5   0  -3   -0.66    0.62
   5   0  -3   -0.14    0.57
   5   0  -3    0.02    0.26
  -5   0   3   -0.32    0.26
   5   0  -3    0.09    0.20
  -5   0   3   -0.25    0.23
   5   0  -3   -0.49    0.26
  -5   0   3   -0.10    0.28
   5   0  -3    0.23    0.28
   4   0  -3    0.07    0.31
   4   0  -3   -0.01    0.23
   4   0  -3    0.42    0.31
   4   0  -3   -0.09    0.18
  -4   0   3   -0.12    0.17
   4   0  -3    0.21    0.22
  -4   0   3   -0.19    0.15
  -4   0   3   -0.02    0.26
  -4   0   3    0.03    0.19
  -3   0   3    0.03    0.16
  -3   0   3   -0.10    0.19
   3   0  -3   -0.06    0.13
  -3   0   3    0.14    0.13
  -3   0   3    0.02    0.11
   3   0  -3   -0.12    0.36
   3   0  -3   -0.15    0.13
   2   0  -3    0.03    0.09
  -2   0   3    0.04    0.06
   2   0  -3   -0.01    0.07
   2   0  -3   -0.08    0.29
  -2   0   3   -0.03    0.07
   1   0  -3    0.06    0.05
   1   0  -3   -0.25    0.17
   1   0  -3    0.02    0.04
  -1   0   3    0.01    0.03
   1   0  -3   -0.13    0.10
   0   0  -3    0.00    0.07
   0   0   3    0.01    0.06
   0   0   3    0.02    0.05
   0   0  -3    0.05    0.11
   0   0  -3    0.00    0.06
   0   0  -3    0.04    0.16
  -1   0  -3    0.10    0.11
  -1   0  -3    0.05    0.12
  -1   0  -3   -0.09    0.10
   1   0   3    0.03    0.12
  -1   0  -3   -0.01    0.13
   1   0   3   -0.08    0.10
   1   0   3    0.01    0.13
  -1   0  -3   -0.09    0.10
  -2   0  -3   -0.15    0.18
   2   0   3   -0.15    0.10
   2   0   3   -0.08    0.14
  -2   0  -3    0.00    0.15
   3   0   3   -0.16    0.15
  -3   0  -3   -0.29    0.21
  -3   0  -3   -0.36    0.26
  -3   0  -3   -0.10    0.13
  -4   0  -3   -0.03    0.28
  -4   0  -3    0.03    0.20
  -4   0  -3   -0.04    0.16
   4   0   3   -0.11    0.32
   4   0   3    0.19    0.23
  -4   0  -3    0.09    0.23
  -5   0  -3    0.47    0.33
   5   0   3    0.49    0.25
  -5   0  -3    0.03    0.31
   5   0   3    0.03    0.21
  -5   0  -3    0.81    0.37
   5   0   3   -0.05    0.24
   5   0   3   -0.13    0.26
  -5   0  -3    0.93    0.39
   6   0   3   -0.30    0.27
   6   0   3    0.10    0.24
  -6   0  -3    0.04    0.24
   6   0   3   -0.11    0.50
  -6   0  -3   -0.16    0.32
   6   0   3    0.18    0.19
  -6   0  -3   -0.76    0.42
   6   0   3   -0.55    0.42
   6   0   3    0.24    0.60
  -6   0  -3   -0.42    0.60
  -7   0  -3   -0.38    0.44
  -7   0  -3    0.12    0.49
   7   0   3    0.11    0.27
   7   0   3   -0.57    0.69
  -7   0  -3    1.51    0.89
   7   0   3   -0.47    0.33
  -7   0  -3    0.92    0.45
  -8   0  -3    1.50    0.91
  -8   0  -3   -0.45    0.56
  -8   0  -3   -0.30    0.63
   8   0   3    1.64    0.64
  -8  -1   3    0.56    0.75
   8  -1  -3    0.29    1.28
  -8  -1   3    0.92    0.69
  -8  -1   3    0.92    0.50
  -8   1   3    0.80    0.68
  -8   1   3    1.83    0.47
  -8   1   3    1.48    0.58
   8   1  -3   -1.47    1.42
   7  -1  -3   -0.58    0.58
   7  -1  -3    0.07    0.48
  -7  -1   3    0.08    0.29
  -7  -1   3    0.11    0.37
  -7  -1   3   -0.11    0.51
  -7  -1   3    0.06    0.57
  -7   1   3   -0.16    0.36
   7   1  -3    0.40    0.89
   7   1  -3   -0.30    0.32
  -7   1   3   -0.28    0.48
   7   1  -3    0.06    0.38
  -7   1   3    0.42    0.27
   6  -1  -3    1.26    0.77
   6  -1  -3    1.36    0.42
   6  -1  -3    1.41    0.35
  -6  -1   3    1.05    0.30
  -6  -1   3    1.14    0.28
   6  -1  -3    1.03    0.86
  -6  -1   3    1.01    0.48
  -6  -1   3    1.17    0.37
   6  -1  -3    0.88    0.31
   6  -1  -3    1.20    0.24
  -6   1   3    1.00    0.27
   6   1  -3    1.22    0.44
  -6   1   3    0.82    0.33
   6   1  -3    1.56    0.74
   6   1  -3    1.31    0.35
  -6   1   3    0.96    0.36
  -6   1   3    1.55    0.40
   6   1  -3    1.35    0.29
   5  -1  -3    0.28    0.44
   5  -1  -3    1.45    0.29
   5  -1  -3    1.22    0.29
   5  -1  -3    1.25    0.29
  -5  -1   3    0.68    0.33
  -5  -1   3    1.02    0.31
  -5  -1   3    1.07    0.38
  -5  -1   3    0.87    0.27
  -5   1   3    1.07    0.30
  -5   1   3    0.84    0.32
   5   1  -3    1.25    0.25
   5   1  -3    1.57    0.67
  -5   1   3    1.07    0.30
   5   1  -3    1.09    0.27
  -5   1   3    1.25    0.25
   5   1  -3    1.22    0.44
   5   1  -3    1.69    0.36
   5   1  -3    1.27    0.35
  -4  -1   3    8.25    0.59
   4  -1  -3    8.17    0.61
   4  -1  -3    8.36    0.61
   4  -1  -3    8.80    0.61
   4  -1  -3    8.30    0.69
  -4  -1   3    8.34    0.59
   4  -1  -3    7.74    0.62
  -4  -1   3    8.39    0.58
  -4  -1   3    6.66    0.61
   4   1  -3    8.49    0.57
  -4   1   3    7.64    0.62
  -4   1   3    8.31    0.60
  -4   1   3    8.48    0.64
   4   1  -3    8.17    0.73
   4   1  -3    6.93    0.79
   4   1  -3    8.89    0.62
   4   1  -3    8.61    0.69
  -4   1   3    8.03    0.59
   4   1  -3    8.58    0.59
   3  -1  -3    1.53    0.22
   3  -1  -3    0.99    0.41
  -3  -1   3    1.30    0.22
  -3  -1   3    1.17    0.25
  -3  -1   3    0.99    0.19
  -3  -1   3    1.30    0.19
   3  -1  -3    1.21    0.21
  -3   1   3    1.72    0.21
   3   1  -3    0.85    0.17
  -3   1   3    1.75    0.30
  -3   1   3    1.42    0.21
   3   1  -3    1.18    0.25
   3   1  -3    1.11    0.44
   3   1  -3    1.18    0.45
  -3   1   3    1.03    0.21
   3   1  -3    1.40    0.28
  -2  -1   3    1.18    0.12
   2  -1  -3    1.08    0.25
   2  -1  -3    1.22    0.17
  -2  -1   3    1.21    0.12
  -2  -1   3    0.67    0.21
   2  -1  -3    1.23    0.15
   2  -1  -3    1.34    0.29
   2  -1  -3    1.06    0.22
  -2   1   3    1.27    0.15
   2   1  -3    1.07    0.12
   2   1  -3    0.93    0.20
   2   1  -3    0.89    0.17
  -2   1   3    1.06    0.14
   2   1  -3    1.13    0.15
  -2   1   3    0.84    0.22
   2   1  -3    1.17    0.34
   2   1  -3    1.05    0.26
   1  -1  -3   -0.06    0.16
   1  -1  -3   -0.25    0.22
   1  -1  -3    0.07    0.06
   1  -1  -3   -0.09    0.10
   1  -1  -3    0.07    0.06
  -1   1   3   -0.02    0.16
  -1   1   3    0.12    0.06
   1   1  -3   -0.12    0.14
  -1   1   3    0.11    0.06
   1   1  -3    0.05    0.16
   1   1  -3    0.19    0.12
   0  -1   3    2.46    0.18
   0  -1  -3    2.97    0.21
   0  -1  -3    2.43    0.22
   0  -1   3    2.68    0.18
   0  -1  -3    2.46    0.25
   0  -1  -3    2.78    0.21
   0  -1  -3    2.53    0.28
   0   1  -3    2.66    0.26
   0   1  -3    2.21    0.25
   0   1  -3    2.55    0.28
   0   1  -3    2.61    0.18
   0   1   3    2.83    0.21
   0   1   3    2.76    0.20
   1  -1   3   13.51    0.90
  -1  -1  -3   15.26    0.87
  -1  -1  -3   14.70    0.91
   1  -1   3   15.52    0.88
  -1  -1  -3   14.99    0.90
   1  -1   3   14.29    0.88
  -1   1  -3   15.18    0.88
  -1   1  -3   14.97    0.90
  -1   1  -3   14.69    0.88
   1   1   3   12.99    0.90
  -1   1  -3   14.26    0.90
  -1   1  -3   14.95    0.86
   1   1   3   16.20    0.90
   1   1   3   14.75    0.88
  -2  -1  -3    8.23    0.53
  -2  -1  -3    6.37    0.49
  -2  -1  -3    7.12    0.41
  -2  -1  -3    7.53    0.52
  -2  -1  -3    7.61    0.51
   2  -1   3    6.43    0.50
   2  -1   3    7.45    0.52
  -2   1  -3    6.79    0.50
   2   1   3    6.36    0.50
   2   1   3    7.11    0.53
  -2   1  -3    7.38    0.51
  -2   1  -3    7.01    0.52
   3  -1   3   -0.08    0.16
  -3  -1  -3    0.13    0.22
  -3  -1  -3   -0.14    0.20
  -3  -1  -3   -0.10    0.19
   3  -1   3   -0.08    0.16
  -3  -1  -3    0.11    0.17
  -3   1  -3   -0.16    0.26
  -3   1  -3    0.05    0.24
  -3   1  -3    0.19    0.19
   3   1   3    0.19    0.14
  -3   1  -3    0.14    0.19
   3   1   3   -0.06    0.18
   3   1   3   -0.25    0.26
   4  -1   3    0.94    0.24
   4  -1   3    1.01    0.34
  -4  -1  -3    1.77    0.33
  -4  -1  -3    1.52    0.39
  -4  -1  -3    1.08    0.22
  -4  -1  -3    1.62    0.30
   4  -1   3    1.16    0.24
  -4   1  -3    0.88    0.33
  -4   1  -3    1.14    0.30
   4   1   3    1.35    0.32
  -4   1  -3    0.91    0.25
   4   1   3    1.01    0.13
   4   1   3    0.96    0.39
  -4   1  -3    1.70    0.34
   4   1   3    1.28    0.29
   5  -1   3    0.31    0.47
  -5  -1  -3    0.09    0.42
   5  -1   3   -0.09    0.32
  -5  -1  -3   -0.05    0.26
   5  -1   3    0.15    0.10
  -5  -1  -3    0.81    0.30
   5  -1   3    0.05    0.37
   5  -1   3    0.05    0.32
  -5   1  -3    0.18    0.44
   5   1   3    0.09    0.37
   5   1   3   -0.13    0.30
   5   1   3    0.03    0.13
  -5   1  -3    0.04    0.30
  -5   1  -3   -0.16    0.23
   5   1   3    0.12    0.18
   5   1   3    0.23    0.25
  -5   1  -3    0.14    0.21
  -6  -1  -3    2.82    0.60
   6  -1   3    3.37    0.64
  -6  -1  -3    3.42    0.56
   6  -1   3    2.31    0.55
  -6  -1  -3    2.09    0.56
   6  -1   3    2.65    0.60
   6  -1   3    2.62    0.28
   6  -1   3    1.99    0.39
   6  -1   3    2.28    0.32
   6   1   3    2.64    0.35
   6   1   3    2.28    0.39
  -6   1  -3    3.35    0.45
  -6   1  -3    4.20    0.83
   6   1   3    3.25    0.52
  -6   1  -3    3.68    0.72
   6   1   3    2.95    0.53
   6   1   3    3.08    0.56
  -6   1  -3    3.61    0.55
   7  -1   3    1.78    0.34
  -7  -1  -3    2.09    0.89
  -7  -1  -3    3.04    0.70
   7  -1   3    1.28    0.40
   7  -1   3    1.80    0.37
  -7  -1  -3    2.96    0.68
   7  -1   3    2.29    0.86
   7  -1   3    2.97    1.10
  -7  -1  -3    2.92    0.52
  -7   1  -3    2.29    0.49
   7   1   3    2.42    0.93
   7   1   3    2.33    0.44
  -7   1  -3    2.37    0.52
   7   1   3    2.20    0.45
   7   1   3    1.17    1.14
  -7   1  -3    1.91    0.48
  -7   1  -3    2.34    0.84
  -8  -1  -3   -0.98    0.74
  -8  -1  -3   -0.28    0.56
  -8  -1  -3   -1.44    0.97
   8  -1   3    1.27    1.24
  -8   1  -3    0.15    0.58
  -8   1  -3    0.36    0.62
   8   1   3   -0.45    1.17
  -8   1  -3    1.38    1.00
  -8  -2   3   -0.47    0.74
  -8  -2   3   -0.04    0.45
   8  -2  -3   -0.47    1.08
  -8   2   3   -0.49    0.72
  -8   2   3    0.19    0.70
   8   2  -3    0.64    0.76
  -8   2   3    0.17    0.35
   7  -2  -3   -0.26    0.41
   7  -2  -3    0.28    0.95
  -7  -2   3    0.21    0.47
  -7  -2   3   -0.20    0.28
   7  -2  -3    0.03    0.52
  -7  -2   3   -0.54    0.50
  -7  -2   3    0.32    0.52
  -7   2   3    0.30    0.29
  -7   2   3   -0.15    0.52
   7   2  -3    0.97    0.92
   7   2  -3    0.24    0.30
   7   2  -3   -0.34    0.43
  -7   2   3    0.14    0.51
  -7   2   3   -0.03    0.50
  -6  -2   3    2.66    0.42
   6  -2  -3    2.05    0.38
  -6  -2   3    1.46    0.33
  -6  -2   3    2.60    0.51
  -6  -2   3    1.37    0.43
   6  -2  -3    2.50    0.44
   6  -2  -3    2.36    0.48
   6  -2  -3    2.55    0.83
   6   2  -3    2.09    0.37
   6   2  -3    2.20    0.54
   6   2  -3    2.28    0.50
  -6   2   3    1.78    0.32
   6   2  -3    1.18    0.83
   6   2  -3    2.19    0.45
  -6   2   3    1.89    0.51
  -6   2   3    2.17    0.45
   6   2  -3    3.29    0.92
   5  -2  -3    4.47    0.47
   5  -2  -3    3.30    0.62
  -5  -2   3    3.79    0.44
   5  -2  -3    3.98    0.46
  -5  -2   3    3.63    0.44
   5  -2  -3    3.15    0.53
  -5  -2   3    4.35    0.45
   5  -2  -3    4.84    0.65
  -5  -2   3    4.47    0.51
   5   2  -3    3.65    0.47
  -5   2   3    3.35    0.57
   5   2  -3    4.90    0.50
  -5   2   3    3.25    0.45
   5   2  -3    3.77    0.75
  -5   2   3    4.61    0.52
   5   2  -3    2.89    0.53
  -5   2   3    3.81    0.49
   5   2  -3    4.21    0.38
   5   2  -3    4.49    0.56
   4  -2  -3    4.06    0.42
  -4  -2   3    3.17    0.40
  -4  -2   3    3.17    0.35
   4  -2  -3    3.51    0.63
   4  -2  -3    4.00    0.45
  -4  -2   3    3.74    0.34
  -4  -2   3    3.46    0.34
   4  -2  -3    3.44    0.36
   4  -2  -3    3.04    0.44
  -4   2   3    3.20    0.36
   4   2  -3    3.32    0.39
  -4   2   3    3.02    0.41
   4   2  -3    3.55    0.38
  -4   2   3    3.67    0.38
   4   2  -3    3.57    0.40
  -4   2   3    3.56    0.36
   4   2  -3    3.52    0.33
   4   2  -3    3.79    0.61
   4   2  -3    3.15    0.46
   3  -2  -3    3.89    0.55
  -3  -2   3    4.41    0.37
  -3  -2   3    4.37    0.33
   3  -2  -3    4.75    0.42
  -3  -2   3    4.06    0.33
   3  -2  -3    4.28    0.46
  -3  -2   3    4.08    0.42
   3  -2  -3    4.53    0.39
   3  -2  -3    4.54    0.36
  -3   2   3    4.42    0.35
   3   2  -3    3.54    0.58
   3   2  -3    4.41    0.34
   3   2  -3    3.97    0.38
   3   2  -3    4.01    0.33
  -3   2   3    4.34    0.43
  -3   2   3    3.67    0.40
   3   2  -3    4.82    0.36
  -3   2   3    4.18    0.34
  -2  -2   3   22.00    1.32
   2  -2  -3   22.68    1.41
   2  -2  -3   22.97    1.45
   2  -2  -3   23.39    1.40
  -2  -2   3   19.87    1.38
  -2  -2   3   22.57    1.33
   2  -2  -3   25.10    1.37
   2  -2  -3   22.88    1.36
   2   2  -3   23.04    1.38
   2   2  -3   23.77    1.33
   2   2  -3   23.39    1.45
   2   2  -3   22.18    1.33
  -2   2   3   25.42    1.36
   2   2  -3   22.60    1.40
  -2   2   3   26.46    1.36
  -2   2   3   25.04    1.42
   1  -2  -3    1.54    0.24
   1  -2  -3    1.59    0.16
   1  -2  -3    1.59    0.16
   1  -2  -3    1.37    0.17
  -1   2   3    1.60    0.16
   1   2  -3    1.25    0.22
  -1   2   3    1.81    0.16
  -1   2   3    1.52    0.27
   1   2  -3    1.28    0.21
  -1   2   3    1.43    0.22
   1   2  -3    1.19    0.26
   0  -2  -3   48.69    2.82
   0  -2   3   47.56    2.74
   0  -2  -3   51.08    2.78
   0  -2  -3   49.58    2.81
   0  -2  -3   47.65    2.81
   0  -2   3   47.70    2.75
   0  -2  -3   51.40    2.78
   0   2  -3   46.58    2.75
   0   2  -3   45.93    2.80
   0   2  -3   51.97    2.75
   0   2  -3   50.75    2.80
   0   2   3   49.98    2.82
   0   2  -3   45.83    2.79
   0   2   3   50.11    2.77
  -1  -2  -3   24.19    1.46
   1  -2   3   25.29    1.43
   1  -2   3   21.72    1.43
  -1  -2  -3   25.72    1.43
  -1  -2  -3   23.15    1.47
  -1  -2  -3   25.84    1.45
   1  -2   3   25.64    1.43
  -1  -2  -3   25.75    1.45
   1   2   3   24.25    1.44
   1   2   3   22.28    1.46
  -1   2  -3   23.95    1.46
   1   2   3   24.56    1.44
   1   2   3   26.38    1.45
  -1   2  -3   24.16    1.43
  -1   2  -3   24.84    1.44
  -1   2  -3   25.43    1.43
  -1   2  -3   25.15    1.41
  -2  -2  -3    6.13    0.48
   2  -2   3    5.75    0.43
  -2  -2  -3    6.75    0.49
  -2  -2  -3    5.34    0.48
   2  -2   3    5.72    0.46
   2  -2   3    6.51    0.47
   2   2   3    5.28    0.46
  -2   2  -3    5.52    0.44
   2   2   3    6.07    0.40
   2   2   3    6.74    0.47
  -2   2  -3    5.86    0.46
  -2   2  -3    6.94    0.43
  -2   2  -3    5.93    0.45
  -3  -2  -3    8.49    0.62
   3  -2   3    7.71    0.60
   3  -2   3    7.77    0.59
  -3  -2  -3    8.12    0.61
   3  -2   3    7.86    0.56
  -3  -2  -3    8.04    0.60
  -3   2  -3    7.52    0.63
  -3   2  -3    9.52    0.58
   3   2   3    7.66    0.61
   3   2   3    8.32    0.66
  -3   2  -3    8.32    0.60
   3   2   3    8.05    0.50
  -3   2  -3    7.99    0.64
  -4  -2  -3   10.91    0.88
  -4  -2  -3   11.44    0.80
   4  -2   3    9.77    0.78
   4  -2   3   10.63    0.83
  -4  -2  -3   12.70    0.78
  -4  -2  -3   11.44    0.88
   4  -2   3   10.19    0.73
   4  -2   3   11.50    0.85
  -4   2  -3   11.62    0.79
  -4   2  -3   11.61    0.79
  -4   2  -3   10.26    0.79
   4   2   3   10.69    0.84
   4   2   3   12.01    0.90
   4   2   3   10.33    0.78
   4   2   3   10.17    0.66
  -5  -2  -3    0.61    0.46
   5  -2   3    0.13    0.11
  -5  -2  -3    0.28    0.31
   5  -2   3    0.03    0.46
  -5  -2  -3    0.32    0.25
  -5  -2  -3   -0.57    0.44
   5  -2   3    0.42    0.33
   5  -2   3    0.35    0.42
   5  -2   3   -0.09    0.18
   5   2   3    0.07    0.14
  -5   2  -3   -0.04    0.23
  -5   2  -3    0.12    0.34
   5   2   3    0.26    0.23
   5   2   3    0.17    0.26
   5   2   3    0.11    0.48
  -5   2  -3    0.08    0.42
  -5   2  -3    0.38    0.43
   5   2   3   -0.33    0.47
   6  -2   3    0.78    0.22
   6  -2   3    0.27    0.45
  -6  -2  -3    0.78    0.37
  -6  -2  -3    1.42    0.68
  -6  -2  -3    0.91    0.36
   6  -2   3    0.84    0.20
   6  -2   3    1.53    0.41
   6  -2   3    1.01    0.40
   6  -2   3    0.47    0.45
  -6  -2  -3    1.02    0.40
  -6   2  -3    1.09    0.42
   6   2   3    0.73    0.61
   6   2   3    0.75    0.26
   6   2   3    1.51    0.40
   6   2   3    0.31    0.65
  -6   2  -3    0.11    0.42
  -6   2  -3    0.81    0.48
  -6   2  -3    0.70    0.46
   6   2   3    0.58    0.33
   7  -2   3    0.05    0.64
  -7  -2  -3    1.23    0.50
   7  -2   3    1.11    0.27
  -7  -2  -3    1.52    0.40
  -7  -2  -3    0.49    0.87
   7  -2   3    1.34    0.97
  -7  -2  -3    1.63    0.51
   7   2   3    1.00    0.42
  -7   2  -3    0.33    0.70
   7   2   3    0.58    0.76
   7   2   3    0.87    0.35
  -7   2  -3    1.35    0.58
  -7   2  -3    1.02    0.36
   7   2   3   -0.22    0.63
  -7   2  -3    1.12    0.88
  -8  -2  -3   -0.12    0.46
  -8  -2  -3   -0.65    0.60
  -8  -2  -3    1.68    0.91
   8  -2   3    0.44    0.65
  -8   2  -3    0.98    0.53
  -8   2  -3    1.25    0.77
  -8   2  -3    1.56    0.86
   8   2   3    0.09    0.63
   8  -3  -3    0.86    1.06
  -8   3   3    0.02    0.50
   8   3  -3    1.31    1.53
  -8   3   3    1.31    0.59
  -7  -3   3    0.36    0.27
  -7  -3   3   -0.14    0.51
  -7  -3   3    0.15    0.34
  -7  -3   3    0.98    0.42
   7  -3  -3    0.35    0.99
   7   3  -3   -0.59    0.65
  -7   3   3   -0.18    0.36
   7   3  -3   -0.02    0.29
  -7   3   3    0.26    0.46
  -7   3   3   -1.00    0.58
  -7   3   3   -0.26    0.43
   7   3  -3    1.52    0.99
   6  -3  -3    0.14    0.49
   6  -3  -3   -0.52    0.37
  -6  -3   3    0.38    0.27
   6  -3  -3    0.79    0.41
  -6  -3   3   -0.25    0.32
   6  -3  -3    0.76    0.51
  -6  -3   3   -0.02    0.24
   6  -3  -3   -0.34    0.33
  -6  -3   3    0.15    0.23
  -6   3   3    0.25    0.24
   6   3  -3    0.21    0.30
   6   3  -3   -0.80    0.42
   6   3  -3   -0.40    0.41
  -6   3   3    0.27    0.44
   6   3  -3    0.09    0.45
   6   3  -3   -0.09    0.20
  -6   3   3    0.07    0.36
  -6   3   3   -0.39    0.27
   6   3  -3    0.92    0.48
  -5  -3   3    0.62    0.20
  -5  -3   3    0.16    0.27
   5  -3  -3    0.84    0.61
  -5  -3   3    0.41    0.24
   5  -3  -3   -0.14    0.27
   5  -3  -3    0.21    0.28
   5  -3  -3    0.91    0.27
   5  -3  -3    0.66    0.40
  -5  -3   3    0.29    0.22
  -5   3   3    0.41    0.28
  -5   3   3    0.68    0.24
   5   3  -3    0.61    0.33
   5   3  -3    0.90    0.58
   5   3  -3    0.39    0.17
  -5   3   3    0.00    0.27
   5   3  -3    0.64    0.36
   5   3  -3    0.55    0.24
  -4  -3   3    0.09    0.18
  -4  -3   3   -0.10    0.16
   4  -3  -3   -0.08    0.30
  -4  -3   3   -0.09    0.24
   4  -3  -3    0.21    0.17
   4  -3  -3    0.00    0.23
   4  -3  -3    0.90    0.51
   4  -3  -3    0.25    0.29
   4   3  -3    0.19    0.22
   4   3  -3   -0.09    0.14
   4   3  -3   -0.22    0.17
  -4   3   3    0.12    0.23
   4   3  -3    0.17    0.49
  -4   3   3    0.22    0.28
  -4   3   3    0.06    0.17
   4   3  -3    0.63    0.30
  -3  -3   3   18.46    1.32
   3  -3  -3   22.20    1.42
   3  -3  -3   21.62    1.31
   3  -3  -3   21.56    1.35
   3  -3  -3   22.95    1.34
  -3  -3   3   21.69    1.29
   3  -3  -3   23.31    1.34
  -3   3   3   21.31    1.32
   3   3  -3   22.00    1.43
   3   3  -3   23.39    1.35
  -3   3   3   21.61    1.35
   3   3  -3   22.91    1.29
  -3   3   3   21.00    1.31
   3   3  -3   22.72    1.30
   3   3  -3   22.12    1.29
   2  -3  -3   56.34    3.22
   2  -3  -3   60.44    3.26
   2  -3  -3   55.84    3.27
   2  -3  -3   60.78    3.23
  -2  -3   3   49.39    3.23
  -2  -3   3   55.76    3.18
   2  -3  -3   58.13    3.31
  -2  -3   3   52.71    3.18
   2   3  -3   57.47    3.24
  -2   3   3   58.65    3.22
   2   3  -3   56.16    3.22
   2   3  -3   56.24    3.19
  -2   3   3   53.63    3.26
   2   3  -3   58.99    3.30
  -2   3   3   58.93    3.22
   2   3  -3   56.76    3.19
  -2   3   3   56.27    3.30
   1  -3  -3    3.66    0.31
   1  -3  -3    3.49    0.27
   1  -3  -3    2.88    0.31
   1  -3  -3    3.16    0.26
   1  -3  -3    3.89    0.38
   1   3  -3    3.17    0.36
   1   3  -3    3.33    0.19
  -1   3   3    3.40    0.27
   1   3  -3    2.68    0.26
   1   3  -3    3.27    0.28
   1   3  -3    3.30    0.29
   1   3  -3    3.23    0.19
  -1   3   3    2.70    0.39
  -1   3   3    3.24    0.26
  -1   3   3    3.42    0.33
   0  -3  -3  105.83    5.83
   0  -3   3   99.37    5.76
   0  -3  -3  107.31    5.79
   0  -3  -3  106.89    5.79
   0  -3  -3   99.61    5.82
   0  -3   3  103.62    5.76
   0  -3  -3  107.52    5.82
   0   3  -3   99.12    5.80
   0   3   3  108.12    5.79
   0   3  -3  105.73    5.76
   0   3  -3   93.89    5.76
   0   3   3  104.90    5.83
   0   3   3   99.75    5.83
   0   3  -3   94.34    5.79
   0   3  -3  107.45    5.81
   1  -3   3   37.84    2.37
  -1  -3  -3   43.88    2.38
   1  -3   3   36.01    2.39
   1  -3   3   43.35    2.37
  -1  -3  -3   41.18    2.41
  -1  -3  -3   39.75    2.41
  -1  -3  -3   43.43    2.39
  -1  -3  -3   42.88    2.39
   1  -3   3   43.00    2.37
  -1   3  -3   42.36    2.37
   1   3   3   37.60    2.38
  -1   3  -3   42.45    2.37
  -1   3  -3   42.38    2.40
   1   3   3   44.87    2.40
  -1   3  -3   44.34    2.38
   1   3   3   37.63    2.40
   1   3   3   40.69    2.39
  -1   3  -3   43.40    2.36
  -2  -3  -3    0.16    0.15
   2  -3   3   -0.20    0.16
   2  -3   3    0.17    0.20
  -2  -3  -3   -0.01    0.12
   2  -3   3   -0.09    0.11
  -2  -3  -3    0.02    0.15
  -2  -3  -3    0.03    0.21
  -2  -3  -3   -0.13    0.15
  -2   3  -3    0.04    0.15
   2   3   3   -0.04    0.16
  -2   3  -3   -0.03    0.10
   2   3   3   -0.16    0.15
  -2   3  -3    0.18    0.08
   2   3   3    0.16    0.14
   2   3   3   -0.15    0.15
  -2   3  -3   -0.21    0.17
  -3  -3  -3    3.14    0.33
  -3  -3  -3    2.32    0.34
   3  -3   3    1.92    0.34
  -3  -3  -3    2.52    0.24
   3  -3   3    2.45    0.27
   3  -3   3    2.32    0.40
   3  -3   3    2.02    0.27
   3   3   3    2.94    0.44
  -3   3  -3    3.09    0.27
   3   3   3    2.42    0.34
   3   3   3    2.43    0.24
   3   3   3    2.67    0.35
  -3   3  -3    2.05    0.58
  -3   3  -3    1.98    0.30
  -3   3  -3    2.96    0.38
   4  -3   3    0.73    0.31
   4  -3   3    0.14    0.34
   4  -3   3    0.77    0.31
  -4  -3  -3    0.15    0.16
  -4  -3  -3    0.32    0.34
  -4  -3  -3    0.21    0.23
  -4  -3  -3    0.10    0.37
   4  -3   3    0.25    0.08
  -4   3  -3    0.39    0.23
  -4   3  -3   -0.10    0.22
  -4   3  -3    0.65    0.20
   4   3   3    0.55    0.38
   4   3   3    0.36    0.16
   4   3   3    0.52    0.20
  -4   3  -3    0.49    0.23
   4   3   3   -0.11    0.30
  -5  -3  -3   -0.30    0.32
   5  -3   3    0.07    0.37
   5  -3   3   -0.16    0.30
  -5  -3  -3    0.23    0.32
   5  -3   3    0.13    0.14
   5  -3   3   -0.03    0.47
   5  -3   3    0.12    0.34
  -5  -3  -3   -0.47    0.31
  -5  -3  -3    0.18    0.50
   5   3   3    0.06    0.18
  -5   3  -3    0.55    0.24
  -5   3  -3    0.01    0.24
   5   3   3   -0.23    0.38
  -5   3  -3    0.25    0.27
   5   3   3    0.45    0.35
   5   3   3   -0.04    0.43
  -5   3  -3   -0.22    0.41
   6  -3   3    0.69    0.58
  -6  -3  -3    0.82    0.26
  -6  -3  -3    0.73    0.31
   6  -3   3    0.74    0.23
   6  -3   3    0.53    0.69
  -6  -3  -3    0.67    0.45
   6  -3   3    0.43    0.20
   6  -3   3    0.33    0.45
  -6  -3  -3    0.85    0.68
   6  -3   3    0.13    0.41
   6   3   3    1.65    0.64
   6   3   3   -0.20    0.52
  -6   3  -3    0.13    0.36
  -6   3  -3    1.18    0.61
  -6   3  -3    0.37    0.48
   6   3   3    1.27    0.36
   6   3   3    0.49    0.22
   6   3   3    1.07    0.30
   7  -3   3    0.24    0.29
   7  -3   3   -0.08    0.59
   7  -3   3    0.56    1.10
  -7  -3  -3    0.08    0.39
  -7  -3  -3    0.75    0.68
  -7  -3  -3    0.47    0.76
  -7  -3  -3   -0.36    0.88
  -7   3  -3   -0.92    0.47
   7   3   3   -0.20    0.94
  -7   3  -3    0.57    0.67
   7   3   3    0.06    0.30
  -7   3  -3   -0.40    0.36
   7   3   3    0.97    0.93
   7   3   3   -0.06    0.43
  -8  -3  -3   -2.27    1.89
  -8  -3  -3    0.61    0.35
   8  -3   3   -0.94    0.71
  -8  -3  -3    0.58    0.53
   8   3   3   -0.62    1.17
  -8   3  -3    0.89    0.76
  -8   3  -3   -1.39    1.52
  -8  -4   3   -0.25    0.68
   8  -4  -3   -0.12    1.32
  -8   4   3    0.79    0.53
  -8   4   3    0.69    0.43
  -8   4   3    0.42    0.73
   7  -4  -3   -0.21    0.67
  -7  -4   3    0.74    0.48
   7  -4  -3    0.83    0.61
   7  -4  -3   -0.15    0.46
   7   4  -3    0.35    0.60
  -7   4   3   -0.12    0.40
   7   4  -3    0.30    0.62
  -7   4   3   -0.29    0.53
   7   4  -3    0.00    0.20
  -7   4   3    0.38    0.33
   6  -4  -3    4.04    0.77
   6  -4  -3    2.61    0.50
   6  -4  -3    3.48    0.85
  -6  -4   3    3.03    0.56
   6  -4  -3    2.72    0.69
   6  -4  -3    2.72    0.69
  -6  -4   3    2.63    0.43
  -6   4   3    1.54    0.46
   6   4  -3    4.06    0.80
  -6   4   3    2.74    0.44
   6   4  -3    4.26    0.93
   6   4  -3    3.23    0.56
   6   4  -3    2.59    0.54
  -6   4   3    3.03    0.53
  -6   4   3    2.27    0.49
   6   4  -3    3.65    0.61
   6   4  -3    2.15    0.36
   5  -4  -3   -0.59    0.38
   5  -4  -3   -0.23    0.65
   5  -4  -3   -0.22    0.21
   5  -4  -3   -0.22    0.37
  -5  -4   3   -0.06    0.29
  -5  -4   3   -0.19    0.32
  -5   4   3   -0.37    0.23
   5   4  -3   -0.10    0.12
   5   4  -3    0.09    0.24
   5   4  -3   -0.06    0.27
  -5   4   3    0.13    0.34
   5   4  -3   -0.20    0.64
   5   4  -3   -0.08    0.29
  -5   4   3   -0.25    0.20
   4  -4  -3    3.71    0.52
   4  -4  -3    3.80    0.42
   4  -4  -3    3.91    0.45
   4  -4  -3    2.79    0.43
   4  -4  -3    4.37    0.69
  -4  -4   3    3.83    0.39
  -4  -4   3    3.09    0.38
   4   4  -3    4.10    0.68
  -4   4   3    3.10    0.43
  -4   4   3    3.28    0.45
  -4   4   3    3.46    0.41
  -4   4   3    4.09    0.39
   4   4  -3    3.66    0.31
   4   4  -3    3.50    0.40
   4   4  -3    3.54    0.36
   4   4  -3    3.87    0.41
  -3  -4   3    6.80    0.51
   3  -4  -3    7.71    0.58
  -3  -4   3    6.62    0.46
   3  -4  -3    6.33    0.55
  -3  -4   3    6.53    0.48
   3  -4  -3    8.22    0.63
   3  -4  -3    6.80    0.53
   3   4  -3    6.71    0.47
   3   4  -3    6.92    0.48
  -3   4   3    6.91    0.69
   3   4  -3    6.40    0.49
  -3   4   3    7.29    0.55
   3   4  -3    7.58    0.69
   3   4  -3    7.60    0.53
  -3   4   3    7.05    0.52
  -2  -4   3   36.57    2.15
  -2  -4   3   34.99    2.19
  -2  -4   3   35.56    2.15
   2  -4  -3   41.62    2.21
   2  -4  -3   38.90    2.28
   2  -4  -3   38.65    2.19
   2  -4  -3   36.94    2.23
   2  -4  -3   40.84    2.23
   2   4  -3   34.31    2.16
   2   4  -3   38.54    2.19
   2   4  -3   38.57    2.15
  -2   4   3   36.33    2.29
  -2   4   3   37.51    2.23
   2   4  -3   37.62    2.15
   2   4  -3   36.75    2.18
  -2   4   3   40.21    2.19
   2   4  -3   41.40    2.27
  -2   4   3   37.55    2.27
  -1  -4   3    2.95    0.21
   1  -4  -3    3.37    0.38
   1  -4  -3    3.21    0.29
   1  -4  -3    3.55    0.29
  -1  -4   3    3.49    0.22
   1  -4  -3    3.55    0.31
   1   4  -3    3.05    0.28
  -1   4   3    3.31    0.34
   1   4  -3    3.23    0.22
   1   4  -3    3.03    0.34
  -1   4   3    3.71    0.43
  -1   4   3    3.54    0.29
   1   4  -3    3.22    0.27
   0  -4  -3   35.53    2.10
   0  -4   3   35.29    2.08
   0  -4  -3   36.99    2.07
   0  -4  -3   35.12    2.10
   0  -4   3   36.92    2.03
   0  -4  -3   37.44    2.07
   0  -4  -3   38.48    2.10
   0  -4   3   36.56    2.03
   0   4   3   36.64    2.07
   0   4   3   32.86    2.09
   0   4  -3   35.13    2.03
   0   4  -3   37.24    2.03
   0   4  -3   35.23    2.07
   0   4   3   35.18    2.10
   0   4   3   36.64    2.07
   0   4  -3   32.89    2.04
   0   4  -3   36.58    2.08
   0   4  -3   33.47    2.05
  -1  -4  -3   15.05    0.93
  -1  -4  -3   13.81    0.96
   1  -4   3   13.52    0.90
   1  -4   3   15.10    0.91
   1  -4   3   15.71    0.91
  -1  -4  -3   16.02    0.92
  -1  -4  -3   16.71    0.95
   1  -4   3   13.15    0.94
  -1  -4  -3   14.90    0.95
   1  -4   3   15.14    0.91
  -1   4  -3   15.76    0.90
  -1   4  -3   15.68    0.91
   1   4   3   15.84    0.95
  -1   4  -3   14.60    0.91
   1   4   3   13.23    0.94
  -1   4  -3   15.73    0.91
  -1   4  -3   15.88    0.94
   1   4   3   14.81    0.94
  -2  -4  -3    9.53    0.63
   2  -4   3    8.16    0.53
  -2  -4  -3    8.64    0.57
   2  -4   3    8.58    0.58
  -2  -4  -3    7.63    0.61
   2  -4   3    8.69    0.59
   2  -4   3    7.47    0.62
  -2  -4  -3    8.53    0.60
   2  -4   3    7.91    0.55
  -2  -4  -3    8.89    0.64
   2   4   3    8.59    0.58
  -2   4  -3    8.55    0.53
  -2   4  -3    8.29    0.59
   2   4   3    8.06    0.60
  -2   4  -3    9.90    0.55
   2   4   3    8.87    0.61
  -2   4  -3    9.05    0.61
   2   4   3    7.99    0.61
  -2   4  -3    9.34    0.62
  -3  -4  -3    0.63    0.19
  -3  -4  -3    1.11    0.33
  -3  -4  -3    1.06    0.23
  -3  -4  -3    0.29    0.26
   3  -4   3    0.38    0.20
  -3  -4  -3    0.51    0.18
   3  -4   3    0.49    0.21
   3  -4   3    0.26    0.19
  -3  -4  -3    0.29    0.17
   3  -4   3    0.46    0.16
  -3   4  -3    0.67    0.13
   3   4   3    0.52    0.30
   3   4   3    0.71    0.20
  -3   4  -3    0.63    0.25
   3   4   3    0.51    0.17
   3   4   3    0.84    0.30
  -3   4  -3    0.81    0.31
  -3   4  -3    0.36    0.28
  -3   4  -3    0.84    0.19
   4  -4   3    8.86    0.79
   4  -4   3    8.61    0.65
   4  -4   3   10.07    0.72
  -4  -4  -3    9.10    0.69
  -4  -4  -3    9.66    0.79
  -4  -4  -3   10.65    0.74
  -4  -4  -3    7.93    0.63
   4   4   3    7.55    0.68
   4   4   3    8.86    0.78
   4   4   3    8.21    0.60
   4   4   3   10.30    0.71
  -4   4  -3    8.91    0.77
  -4   4  -3    8.95    0.72
   5  -4   3    0.61    0.49
   5  -4   3    0.71    0.19
   5  -4   3    1.34    0.38
  -5  -4  -3    0.31    0.32
   5  -4   3    0.49    0.36
   5  -4   3    0.86    0.22
  -5  -4  -3    0.92    0.33
   5  -4   3    0.65    0.15
   5   4   3    0.51    0.22
  -5   4  -3    0.42    0.31
   5   4   3    0.50    0.24
   5   4   3    0.82    0.41
  -5   4  -3    0.37    0.46
  -5   4  -3    0.15    0.27
  -5   4  -3    0.89    0.38
   5   4   3    0.84    0.42
   6  -4   3    0.55    0.42
  -6  -4  -3    1.09    0.49
   6  -4   3    1.79    0.52
   6  -4   3    0.99    0.22
  -6  -4  -3    1.35    0.39
   6  -4   3    0.85    0.51
   6  -4   3    0.48    0.43
   6  -4   3    1.10    0.27
  -6  -4  -3    1.12    0.41
   6   4   3    1.10    0.28
  -6   4  -3    1.17    0.48
   6   4   3    0.94    0.43
  -6   4  -3    0.82    0.46
   6   4   3    0.53    0.56
  -6   4  -3    1.15    0.63
   6   4   3    0.37    0.41
  -7  -4  -3   -0.22    0.54
   7  -4   3   -0.65    1.08
   7  -4   3    0.71    0.51
  -7  -4  -3    1.69    0.55
  -7  -4  -3    0.19    0.51
  -7   4  -3    1.02    0.56
   7   4   3    1.04    0.50
   7   4   3    0.89    0.82
   7   4   3    0.49    0.44
  -7   4  -3    0.21    0.54
  -7   4  -3    0.78    0.90
   7   4   3    0.69    0.32
  -7   4  -3    0.75    0.58
  -8  -4  -3    0.35    0.65
   8  -4   3    0.41    1.25
  -8  -4  -3    0.10    0.35
  -8  -4  -3    0.99    0.60
   8   4   3    2.74    0.73
  -8   4  -3    1.81    0.72
  -8   4  -3   -0.03    0.71
  -8  -5   3    1.41    0.58
  -8  -5   3    1.43    0.60
  -8   5   3    1.98    0.60
  -8   5   3    1.45    0.45
   8   5  -3    1.76    1.47
   7  -5  -3    0.65    1.00
  -7  -5   3   -0.53    0.51
   7  -5  -3   -0.39    0.53
  -7  -5   3   -0.33    0.58
  -7  -5   3   -0.61    0.51
   7   5  -3    1.47    1.13
  -7   5   3    0.44    0.34
  -7   5   3   -0.73    0.58
  -7   5   3    0.90    0.43
   7   5  -3    1.51    0.50
   6  -5  -3    0.95    0.49
  -6  -5   3    3.09    0.58
   6  -5  -3    2.05    0.89
   6  -5  -3    1.85    0.45
  -6  -5   3    0.82    0.44
  -6  -5   3    1.42    0.52
  -6   5   3    2.34    0.46
  -6   5   3    1.95    0.40
  -6   5   3    1.87    0.62
   6   5  -3    2.53    0.56
  -6   5   3    0.95    0.47
   6   5  -3    1.58    0.89
   5  -5  -3    0.16    0.46
   5  -5  -3   -0.09    0.20
   5  -5  -3    0.06    0.36
  -5  -5   3   -0.10    0.35
   5  -5  -3   -0.24    0.42
   5   5  -3   -0.03    0.10
   5   5  -3    0.03    0.26
  -5   5   3   -0.02    0.25
   5   5  -3    0.05    0.35
   5   5  -3    0.04    0.25
  -5   5   3   -0.15    0.34
  -5   5   3   -0.54    0.33
  -5   5   3    0.21    0.27
   5   5  -3    0.65    0.59
   4  -5  -3    2.72    0.44
   4  -5  -3    3.59    0.68
   4  -5  -3    2.56    0.38
  -4  -5   3    3.74    0.40
   4  -5  -3    3.00    0.46
   4  -5  -3    4.52    0.53
  -4  -5   3    3.29    0.37
   4   5  -3    3.52    0.38
   4   5  -3    3.44    0.47
  -4   5   3    3.15    0.36
  -4   5   3    3.26    0.74
   4   5  -3    3.20    0.27
   4   5  -3    3.72    0.38
  -4   5   3    3.18    0.40
   4   5  -3    3.12    0.41
  -4   5   3    2.74    0.39
  -3  -5   3    4.50    0.37
  -3  -5   3    4.62    0.36
   3  -5  -3    5.66    0.53
   3  -5  -3    4.33    0.43
  -3  -5   3    4.70    0.44
   3  -5  -3    4.41    0.44
   3  -5  -3    4.43    0.52
   3  -5  -3    5.65    0.50
   3   5  -3    4.17    0.33
   3   5  -3    4.19    0.38
  -3   5   3    4.06    0.41
  -3   5   3    4.91    0.38
  -3   5   3    4.85    0.63
   3   5  -3    4.26    0.34
  -3   5   3    4.53    0.40
   3   5  -3    5.60    0.45
   3   5  -3    5.28    0.60
   3   5  -3    4.37    0.37
   2  -5  -3    4.58    0.43
   2  -5  -3    4.85    0.37
  -2  -5   3    3.54    0.42
  -2  -5   3    4.36    0.32
   2  -5  -3    4.44    0.41
   2  -5  -3    5.07    0.42
  -2  -5   3    4.17    0.31
   2  -5  -3    4.89    0.54
  -2  -5   3    3.53    0.35
   2   5  -3    4.49    0.42
   2   5  -3    3.91    0.34
  -2   5   3    4.18    0.46
   2   5  -3    4.18    0.37
   2   5  -3    4.41    0.31
   2   5  -3    4.20    0.33
  -2   5   3    4.37    0.44
  -2   5   3    4.56    0.36
   2   5  -3    4.63    0.32
  -2   5   3    4.72    0.37
  -1  -5   3    0.86    0.14
  -1  -5   3    1.03    0.29
   1  -5  -3    1.19    0.27
   1  -5  -3    1.19    0.18
   1  -5  -3    1.16    0.19
   1  -5  -3    1.14    0.20
   1  -5  -3    0.95    0.15
  -1  -5   3    0.79    0.12
   1   5  -3    0.94    0.19
  -1   5   3    1.19    0.21
   1   5  -3    1.11    0.13
   1   5  -3    1.10    0.23
  -1   5   3    1.34    0.20
  -1   5   3    1.46    0.36
   1   5  -3    0.95    0.16
  -1   5   3    1.13    0.22
   1   5  -3    0.92    0.14
   0  -5  -3    0.51    0.22
   0  -5  -3    0.48    0.18
   0  -5  -3    0.80    0.21
   0  -5  -3    0.46    0.18
   0  -5  -3    0.45    0.16
   0   5  -3    0.44    0.11
   0   5   3    0.64    0.23
   0   5   3    0.43    0.18
   0   5   3    0.28    0.11
   0   5   3    0.28    0.13
   0   5   3    0.48    0.17
  -1  -5  -3   16.31    0.99
  -1  -5  -3   16.35    1.01
  -1  -5  -3   16.96    1.01
  -1  -5  -3   14.57    1.02
   1  -5   3   15.27    0.97
   1  -5   3   16.05    0.96
   1  -5   3   16.14    0.97
  -1  -5  -3   15.82    1.00
  -1   5  -3   16.34    0.99
  -1   5  -3   15.56    0.96
  -1   5  -3   16.90    0.97
  -1   5  -3   15.92    0.97
   1   5   3   15.73    1.01
  -1   5  -3   16.88    0.94
   1   5   3   14.38    1.01
  -2  -5  -3   24.17    1.46
   2  -5   3   23.13    1.38
   2  -5   3   23.42    1.42
   2  -5   3   23.49    1.43
  -2  -5  -3   21.18    1.44
   2  -5   3   21.43    1.38
  -2  -5  -3   24.96    1.45
  -2  -5  -3   23.27    1.43
  -2  -5  -3   23.84    1.41
  -2   5  -3   26.84    1.38
   2   5   3   24.67    1.44
  -2   5  -3   23.22    1.38
  -2   5  -3   24.12    1.48
  -2   5  -3   25.32    1.43
   2   5   3   22.83    1.43
  -2   5  -3   23.23    1.43
   2   5   3   23.00    1.42
   3  -5   3    2.92    0.29
  -3  -5  -3    3.62    0.38
   3  -5   3    3.44    0.43
  -3  -5  -3    2.34    0.39
  -3  -5  -3    3.56    0.34
   3  -5   3    3.35    0.26
   3  -5   3    2.81    0.35
  -3  -5  -3    3.39    0.50
   3  -5   3    3.46    0.36
  -3  -5  -3    2.95    0.47
  -3  -5  -3    3.66    0.41
   3   5   3    2.80    0.39
   3   5   3    2.67    0.39
   3   5   3    2.89    0.31
  -3   5  -3    3.31    0.44
  -3   5  -3    3.14    0.30
  -3   5  -3    3.44    0.45
   3   5   3    3.70    0.48
   4  -5   3    9.59    0.81
  -4  -5  -3    8.12    0.78
   4  -5   3    9.16    0.73
   4  -5   3    8.98    0.59
  -4  -5  -3    9.51    0.70
  -4  -5  -3    9.31    0.66
   4  -5   3    9.60    0.67
   4  -5   3    9.80    0.78
  -4  -5  -3   10.45    0.76
  -4  -5  -3    7.82    0.75
  -4   5  -3    9.47    0.82
   4   5   3    8.62    0.72
  -4   5  -3   10.27    0.64
   4   5   3    9.00    0.83
   4   5   3   11.33    0.83
   4   5   3    8.44    0.64
  -4   5  -3    9.80    0.77
   5  -5   3    0.74    0.38
   5  -5   3   -0.06    0.16
  -5  -5  -3   -0.02    0.28
   5  -5   3    0.22    0.49
  -5  -5  -3   -0.09    0.54
  -5  -5  -3    0.07    0.25
   5  -5   3   -0.06    0.47
   5  -5   3   -0.06    0.32
   5   5   3    0.19    0.25
   5   5   3   -0.03    0.47
   5   5   3    0.10    0.31
  -5   5  -3    0.27    0.25
  -5   5  -3    0.08    0.49
  -5   5  -3   -0.32    0.24
   5   5   3    0.00    0.52
   6  -5   3    2.77    0.41
   6  -5   3    3.06    0.79
   6  -5   3    3.64    0.73
   6  -5   3    3.00    0.79
  -6  -5  -3    4.18    0.59
  -6  -5  -3    3.06    0.86
   6  -5   3    2.49    0.35
  -6  -5  -3    2.66    0.56
   6   5   3    3.48    0.72
  -6   5  -3    3.20    0.55
  -6   5  -3    3.14    0.53
   6   5   3    3.22    0.80
   6   5   3    3.37    0.45
  -6   5  -3    2.57    0.48
   7  -5   3   -0.18    0.28
  -7  -5  -3    0.02    0.50
  -7  -5  -3   -0.53    0.40
  -7  -5  -3   -0.47    0.97
   7  -5   3   -0.85    0.83
   7   5   3    1.36    0.98
  -7   5  -3    0.14    0.49
  -7   5  -3    0.22    0.59
  -7   5  -3   -0.32    0.74
   7   5   3    0.19    0.51
  -7   5  -3    0.75    0.59
  -8  -5  -3    2.13    1.35
   8  -5   3    0.28    0.64
  -8  -5  -3    0.31    0.38
   8   5   3    0.80    1.23
  -8   5  -3    1.75    0.62
  -8  -6   3    0.33    0.64
   8  -6  -3   -0.10    1.39
  -8  -6   3    0.04    0.79
  -8   6   3    1.32    0.47
  -8   6   3    1.18    0.74
  -7  -6   3    0.09    0.53
  -7  -6   3    0.09    0.61
   7  -6  -3   -0.91    1.02
   7  -6  -3   -0.53    1.16
  -7  -6   3    0.22    0.58
  -7   6   3    0.50    0.51
  -7   6   3    0.74    0.53
  -7   6   3    0.95    0.45
   6  -6  -3    2.67    0.69
   6  -6  -3    2.33    0.49
   6  -6  -3    2.12    0.55
  -6  -6   3    2.61    0.51
   6  -6  -3    2.96    0.76
  -6  -6   3    2.22    0.44
  -6  -6   3    1.18    0.52
  -6   6   3    2.03    0.51
  -6   6   3    2.36    0.40
  -6   6   3    2.26    0.43
   6   6  -3    2.24    0.51
   6   6  -3    2.33    0.58
   5  -6  -3    4.32    0.63
   5  -6  -3    4.92    0.70
   5  -6  -3    6.03    0.71
  -5  -6   3    5.22    0.57
  -5  -6   3    5.67    0.64
   5  -6  -3    5.74    0.66
   5  -6  -3    5.82    0.52
   5   6  -3    4.46    0.65
   5   6  -3    5.34    0.61
  -5   6   3    4.99    0.99
   5   6  -3    5.80    0.63
  -5   6   3    5.94    0.67
  -5   6   3    3.76    1.06
   5   6  -3    5.28    0.60
   4  -6  -3    9.25    0.92
  -4  -6   3    8.29    0.64
  -4  -6   3    7.91    0.69
   4  -6  -3    7.90    0.71
   4  -6  -3    9.07    0.67
   4  -6  -3    8.77    0.68
  -4  -6   3    9.65    0.65
   4  -6  -3    8.58    0.69
   4   6  -3    9.70    0.65
   4   6  -3    9.28    0.63
   4   6  -3    7.41    0.75
   4   6  -3    8.29    0.50
  -4   6   3    8.46    0.68
  -4   6   3    7.22    0.65
  -4   6   3    6.81    0.75
  -4   6   3    7.94    0.67
  -3  -6   3    2.24    0.32
  -3  -6   3    2.16    0.26
   3  -6  -3    2.25    0.27
   3  -6  -3    2.01    0.30
  -3  -6   3    2.36    0.30
   3  -6  -3    3.15    0.56
   3  -6  -3    1.90    0.38
   3  -6  -3    2.36    0.42
   3   6  -3    1.70    0.21
   3   6  -3    2.47    0.34
   3   6  -3    1.95    0.28
   3   6  -3    2.91    0.54
  -3   6   3    2.08    0.35
   3   6  -3    1.72    0.20
  -3   6   3    2.16    0.37
   3   6  -3    1.69    0.28
  -3   6   3    1.99    0.29
  -3   6   3    2.32    0.55
   2  -6  -3   13.29    0.97
   2  -6  -3   13.04    0.84
  -2  -6   3   12.99    0.91
  -2  -6   3   11.85    0.83
  -2  -6   3   13.44    0.81
  -2  -6   3   13.16    0.80
   2  -6  -3   13.92    0.87
   2  -6  -3   12.69    0.93
  -2   6   3   12.56    0.89
  -2   6   3   13.13    0.86
   2   6  -3   13.21    0.80
   2   6  -3   13.17    0.81
   2   6  -3   15.18    0.84
   2   6  -3   13.69    0.81
  -2   6   3   13.35    1.08
   2   6  -3   12.39    0.82
  -2   6   3   13.69    0.86
   1  -6  -3    8.47    0.68
  -1  -6   3    9.83    0.61
   1  -6  -3   10.43    0.71
   1  -6  -3   10.10    0.72
  -1  -6   3    9.90    0.69
   1  -6  -3   10.31    0.66
  -1  -6   3   10.23    0.60
   1  -6  -3   10.24    0.66
   1   6  -3    9.55    0.71
   1   6  -3    9.85    0.61
   1   6  -3    9.47    0.60
  -1   6   3   10.11    0.66
  -1   6   3    9.22    0.71
   1   6  -3    9.59    0.61
   1   6  -3   10.29    0.62
  -1   6   3    9.76    0.76
   0  -6  -3   17.94    1.05
   0  -6   3   14.26    1.03
   0  -6  -3   19.10    1.10
   0  -6   3   17.74    1.00
   0  -6  -3   16.30    1.07
   0  -6  -3   16.25    1.04
   0  -6  -3   17.51    1.04
   0  -6   3   16.27    1.06
   0  -6   3   17.27    1.00
   0   6   3   16.51    1.07
   0   6  -3   15.81    0.98
   0   6  -3   18.43    1.04
   0   6  -3   17.18    1.06
   0   6   3   15.45    1.08
   0   6   3   17.43    1.05
   0   6  -3   15.34    0.98
   0   6  -3   17.04    1.00
   0   6  -3   17.30    1.00
  -1  -6  -3   12.44    0.83
  -1  -6  -3   11.62    0.83
   1  -6   3   10.54    0.81
   1  -6   3   12.26    0.81
   1  -6   3   13.52    0.79
  -1  -6  -3   11.91    0.82
   1  -6   3   12.87    0.79
  -1  -6  -3   13.23    0.81
  -1  -6  -3   13.47    0.83
   1   6   3   12.93    0.83
   1   6   3   10.67    0.81
  -1   6  -3   13.89    0.80
   1   6   3   12.83    0.82
  -1   6  -3   12.67    0.80
   1   6   3   12.68    0.85
  -1   6  -3   13.96    0.74
  -1   6  -3   12.77    0.80
   1   6   3   10.76    0.85
  -1   6  -3   13.34    0.80
   2  -6   3    3.58    0.39
  -2  -6  -3    3.92    0.39
   2  -6   3    3.83    0.38
   2  -6   3    3.54    0.43
  -2  -6  -3    4.34    0.39
   2  -6   3    4.53    0.35
   2  -6   3    3.31    0.32
  -2   6  -3    4.09    0.37
   2   6   3    4.11    0.42
  -2   6  -3    4.77    0.30
  -2   6  -3    3.81    0.36
   2   6   3    4.70    0.45
  -2   6  -3    4.09    0.43
  -2   6  -3    4.58    0.36
   2   6   3    4.38    0.47
   2   6   3    3.82    0.37
   3  -6   3   10.51    0.81
  -3  -6  -3    9.21    0.86
  -3  -6  -3   10.85    0.83
  -3  -6  -3   12.28    0.77
  -3  -6  -3   10.86    0.74
  -3  -6  -3   11.60    0.82
   3  -6   3   12.07    0.82
   3  -6   3   11.51    0.70
  -3  -6  -3   13.18    0.80
   3  -6   3   10.64    0.71
   3  -6   3   11.00    0.80
   3   6   3   10.11    0.75
  -3   6  -3   11.83    0.83
  -3   6  -3   11.11    0.74
   3   6   3   11.87    0.82
  -3   6  -3   11.50    0.80
   3   6   3   10.49    0.85
   3   6   3   11.68    0.84
  -4  -6  -3    8.17    0.82
   4  -6   3    7.64    0.53
   4  -6   3    6.84    0.66
  -4  -6  -3    7.11    0.61
   4  -6   3    7.54    0.56
  -4  -6  -3    7.21    0.79
   4  -6   3    9.12    0.76
   4  -6   3    7.98    0.71
  -4  -6  -3    7.20    0.63
  -4   6  -3    8.93    0.71
  -4   6  -3    7.05    0.65
  -4   6  -3    7.60    0.67
   4   6   3    7.80    0.68
   4   6   3    6.40    0.64
   4   6   3    7.06    0.57
   4   6   3    7.91    0.71
  -4   6  -3    8.00    0.57
  -5  -6  -3   -0.10    0.32
  -5  -6  -3    0.57    0.32
   5  -6   3    0.39    0.19
   5  -6   3    0.81    0.28
   5  -6   3    0.19    0.33
  -5  -6  -3    0.32    0.35
  -5  -6  -3    0.55    0.39
  -5  -6  -3    1.01    0.49
   5  -6   3    0.21    0.43
  -5  -6  -3    0.36    0.29
   5  -6   3    0.69    0.36
  -5   6  -3    0.74    0.37
   5   6   3    0.37    0.32
  -5   6  -3    0.56    0.42
  -5   6  -3    0.33    0.25
   5   6   3    0.64    0.28
   5   6   3    0.65    0.26
   5   6   3    0.39    0.45
  -5   6  -3    0.23    0.41
  -6  -6  -3    0.33    0.47
   6  -6   3    0.81    0.81
   6  -6   3    0.13    0.45
   6  -6   3   -0.43    0.45
  -6  -6  -3    0.47    0.28
   6  -6   3    0.31    0.25
  -6  -6  -3   -0.14    0.59
  -6  -6  -3    0.78    0.52
   6  -6   3    0.93    0.62
  -6   6  -3    0.88    0.63
  -6   6  -3   -0.01    0.44
   6   6   3    0.42    1.30
   6   6   3    0.38    0.35
   6   6   3   -0.69    0.56
  -6   6  -3    0.10    0.31
  -6   6  -3    0.75    0.44
  -7  -6  -3    1.61    0.63
   7  -6   3   -1.26    0.69
   7  -6   3   -0.04    0.30
  -7  -6  -3   -1.05    0.82
  -7  -6  -3    0.02    0.48
  -7  -6  -3   -0.23    0.36
   7   6   3    1.26    0.81
  -7   6  -3    0.47    0.41
  -7   6  -3    0.00    0.37
  -7   6  -3    0.54    0.52
   7   6   3    0.46    1.11
  -8   6  -3    2.82    0.69
   8  -7  -3   -1.27    1.29
   8   7  -3    4.24    1.68
  -7  -7   3    0.03    0.60
   7  -7  -3   -0.84    0.67
  -7  -7   3   -0.38    0.53
  -7   7   3    0.37    0.52
  -7   7   3    0.54    0.61
  -7   7   3    0.38    0.58
   6  -7  -3    0.05    0.51
  -6  -7   3    0.12    0.37
  -6  -7   3    0.34    0.33
   6  -7  -3   -0.58    0.54
   6  -7  -3    0.04    0.54
   6  -7  -3   -0.54    0.71
  -6   7   3    0.29    0.49
   6   7  -3   -0.65    0.48
   6   7  -3    0.57    0.40
  -6   7   3    0.07    0.45
  -6   7   3    0.07    0.47
   5  -7  -3    1.25    0.52
   5  -7  -3    0.41    0.25
   5  -7  -3    0.54    0.26
   5  -7  -3    0.99    0.36
   5  -7  -3    0.45    0.51
  -5  -7   3    0.67    0.31
  -5  -7   3    0.77    0.37
  -5  -7   3    0.32    0.31
  -5   7   3    0.57    0.29
   5   7  -3    0.88    0.41
  -5   7   3    0.89    0.83
   5   7  -3    0.51    0.34
   5   7  -3    0.71    0.44
   5   7  -3    1.53    0.64
  -4  -7   3   18.65    1.17
   4  -7  -3   18.42    1.24
  -4  -7   3   15.84    1.18
   4  -7  -3   19.81    1.30
   4  -7  -3   17.68    1.21
  -4  -7   3   17.45    1.17
   4  -7  -3   19.69    1.32
   4  -7  -3   19.98    1.26
   4   7  -3   16.91    1.16
   4   7  -3   20.56    1.17
  -4   7   3   18.10    1.21
   4   7  -3   17.77    1.22
  -4   7   3   17.85    1.18
  -4   7   3   18.42    1.42
   4   7  -3   17.64    1.16
   3  -7  -3    3.06    0.61
  -3  -7   3    3.07    0.61
   3  -7  -3    1.74    0.38
  -3  -7   3    2.46    0.31
   3  -7  -3    2.63    0.39
  -3  -7   3    2.21    0.31
  -3  -7   3    1.99    0.33
   3  -7  -3    2.96    0.41
   3   7  -3    2.07    0.21
  -3   7   3    2.51    0.39
  -3   7   3    2.86    0.45
   3   7  -3    2.75    0.35
   3   7  -3    2.72    0.51
   3   7  -3    2.58    0.31
   3   7  -3    2.68    0.21
   3   7  -3    2.51    0.30
  -3   7   3    3.11    0.40
   2  -7  -3    4.54    0.46
   2  -7  -3    4.00    0.42
  -2  -7   3    3.55    0.35
   2  -7  -3    3.73    0.39
   2  -7  -3    3.97    0.42
  -2  -7   3    4.16    0.54
   2  -7  -3    3.81    0.40
  -2  -7   3    3.83    0.33
   2  -7  -3    4.12    0.55
  -2  -7   3    4.14    0.34
   2   7  -3    4.08    0.32
   2   7  -3    3.54    0.41
  -2   7   3    3.93    0.42
   2   7  -3    4.63    0.35
   2   7  -3    4.05    0.31
  -2   7   3    4.01    0.41
  -2   7   3    3.81    0.60
   1  -7  -3    0.39    0.21
   1  -7  -3    0.59    0.22
   1  -7  -3    0.73    0.21
   1  -7  -3    0.48    0.23
  -1  -7   3    0.65    0.14
   1  -7  -3    1.04    0.28
  -1  -7   3    0.31    0.27
  -1  -7   3    0.61    0.15
   1   7  -3    0.66    0.13
   1   7  -3    0.60    0.13
   1   7  -3    0.72    0.15
   1   7  -3    0.48    0.22
  -1   7   3    0.52    0.20
  -1   7   3    0.71    0.31
   1   7  -3    0.59    0.16
  -1   7   3    0.32    0.20
   0  -7   3    9.83    0.71
   0  -7   3   10.36    0.64
   0  -7  -3   10.53    0.71
   0  -7  -3    8.90    0.68
   0  -7  -3   11.04    0.74
   0  -7  -3    9.86    0.77
   0  -7   3   10.32    0.63
   0  -7  -3    9.55    0.66
   0  -7   3    8.42    0.63
   0   7   3    9.20    0.66
   0   7  -3   10.68    0.65
   0   7  -3    9.00    0.58
   0   7  -3    9.51    0.63
   0   7   3   10.09    0.66
   0   7  -3    9.92    0.71
   0   7   3    9.34    0.72
   0   7  -3    9.34    0.58
   0   7   3   10.52    0.77
  -1  -7  -3    5.29    0.47
   1  -7   3    4.70    0.42
   1  -7   3    4.84    0.49
   1  -7   3    5.22    0.41
  -1  -7  -3    4.83    0.45
  -1  -7  -3    4.24    0.41
   1  -7   3    4.15    0.43
  -1  -7  -3    5.07    0.43
  -1  -7  -3    5.01    0.43
   1   7   3    4.93    0.49
  -1   7  -3    4.78    0.43
  -1   7  -3    5.43    0.40
   1   7   3    4.65    0.43
   1   7   3    3.94    0.48
  -1   7  -3    4.39    0.38
   1   7   3    4.86    0.42
  -1   7  -3    5.05    0.41
   2  -7   3   36.92    2.38
   2  -7   3   39.71    2.39
  -2  -7  -3   38.62    2.40
  -2  -7  -3   42.31    2.42
  -2  -7  -3   41.87    2.40
   2  -7   3   42.42    2.40
  -2  -7  -3   42.16    2.44
  -2  -7  -3   42.36    2.42
   2  -7   3   35.59    2.32
   2  -7   3   41.47    2.37
   2   7   3   40.84    2.42
   2   7   3   42.83    2.43
  -2   7  -3   40.81    2.38
   2   7   3   39.00    2.39
  -2   7  -3   45.18    2.32
  -2   7  -3   46.62    2.41
   2   7   3   38.48    2.43
  -2   7  -3   40.14    2.40
  -2   7  -3   40.62    2.39
   3  -7   3    1.46    0.36
  -3  -7  -3    0.83    0.26
   3  -7   3    1.77    0.27
   3  -7   3    1.58    0.36
   3  -7   3    1.36    0.25
  -3  -7  -3    1.54    0.41
   3  -7   3    1.38    0.22
  -3  -7  -3    1.38    0.32
  -3  -7  -3    1.71    0.34
  -3   7  -3    1.09    0.26
   3   7   3    1.82    0.42
  -3   7  -3    1.72    0.24
   3   7   3    0.95    0.32
   3   7   3    1.16    0.36
   3   7   3    1.08    0.26
  -3   7  -3    1.55    0.35
  -3   7  -3    1.17    0.27
   4  -7   3    1.00    0.24
   4  -7   3    0.73    0.22
  -4  -7  -3    1.02    0.33
  -4  -7  -3    0.84    0.27
   4  -7   3    1.23    0.42
  -4  -7  -3    0.51    0.60
   4  -7   3    0.76    0.45
   4  -7   3    0.45    0.23
  -4  -7  -3    0.51    0.32
  -4  -7  -3    1.02    0.38
  -4  -7  -3    0.28    0.28
  -4   7  -3    0.26    0.39
   4   7   3    1.41    0.41
   4   7   3    0.64    0.23
  -4   7  -3    0.58    0.21
   4   7   3    1.13    0.30
  -4   7  -3    0.43    0.36
  -4   7  -3    0.86    0.29
   4   7   3    0.61    0.32
  -4   7  -3    0.44    0.24
   5  -7   3    0.01    0.31
  -5  -7  -3    0.71    0.60
  -5  -7  -3    0.28    0.27
  -5  -7  -3    0.16    0.31
   5  -7   3   -0.21    0.25
  -5  -7  -3   -0.36    0.41
   5  -7   3   -0.12    0.37
  -5  -7  -3    0.26    0.34
   5  -7   3   -0.05    0.19
   5  -7   3    0.01    0.55
  -5  -7  -3    0.01    0.48
  -5   7  -3   -0.33    0.25
  -5   7  -3   -0.71    0.48
   5   7   3   -0.54    0.34
  -5   7  -3    0.36    0.32
   5   7   3   -0.05    0.29
   5   7   3    0.73    0.60
  -5   7  -3    0.12    0.45
   5   7   3    0.70    0.61
  -6  -7  -3    0.59    0.55
  -6  -7  -3    0.53    0.72
   6  -7   3    0.30    0.74
  -6  -7  -3   -0.47    0.38
  -6  -7  -3   -0.83    0.76
  -6  -7  -3    0.68    0.37
   6  -7   3    0.27    0.26
   6  -7   3    0.22    0.41
   6  -7   3   -0.34    0.54
  -6   7  -3    1.11    0.62
   6   7   3   -0.41    0.59
  -6   7  -3   -0.46    0.50
   6   7   3    0.32    0.64
   6   7   3    0.38    0.41
  -6   7  -3    0.55    0.33
  -6   7  -3   -0.34    0.67
  -7  -7  -3    0.70    0.41
  -7  -7  -3    2.44    0.89
  -7  -7  -3   -0.05    0.37
   7  -7   3   -0.67    0.62
  -7  -7  -3    0.52    0.51
  -7  -7  -3    0.63    1.01
   7  -7   3   -0.17    0.54
  -7   7  -3    0.20    0.60
   7   7   3    0.26    0.80
  -7   7  -3    0.58    0.65
  -7   7  -3    0.21    0.58
   7   7   3    1.44    1.13
  -7  -8   3    0.22    0.60
   7  -8  -3   -1.80    1.19
  -7  -8   3    1.32    0.55
  -7   8   3   -0.03    0.52
  -7   8   3    0.49    0.62
   6  -8  -3    0.19    0.34
  -6  -8   3    0.84    0.36
   6  -8  -3    0.45    0.98
   6  -8  -3   -0.16    0.60
  -6  -8   3    0.43    0.51
  -6  -8   3    0.51    0.51
  -6   8   3   -0.01    0.34
   6   8  -3   -0.17    0.44
  -6   8   3    0.13    0.49
   6   8  -3    0.73    0.49
  -6   8   3   -0.51    0.61
   5  -8  -3    8.60    0.78
   5  -8  -3    8.25    0.83
  -5  -8   3    7.78    0.64
  -5  -8   3    6.59    0.73
  -5  -8   3    6.99    0.69
   5  -8  -3    7.17    0.89
   5  -8  -3    7.49    0.85
   5  -8  -3    9.89    1.12
   5   8  -3    7.35    0.70
  -5   8   3    9.29    0.83
  -5   8   3    8.14    0.83
  -5   8   3    6.78    0.69
  -5   8   3    6.46    0.76
   5   8  -3    8.42    0.78
   5   8  -3    5.84    1.06
   5   8  -3    6.89    0.77
  -4  -8   3    7.86    0.67
   4  -8  -3    9.21    0.95
   4  -8  -3    9.13    0.82
  -4  -8   3    9.42    0.69
  -4  -8   3    8.62    0.72
   4  -8  -3    9.35    0.87
   4  -8  -3    8.34    0.75
   4   8  -3    8.88    0.91
   4   8  -3    7.58    0.68
   4   8  -3    9.91    0.73
  -4   8   3    7.60    0.73
  -4   8   3    7.06    0.79
  -4   8   3    8.81    0.79
  -4   8   3    7.65    0.72
  -3  -8   3    0.16    0.18
   3  -8  -3    0.15    0.19
  -3  -8   3    0.33    0.19
  -3  -8   3    0.55    0.33
   3  -8  -3    0.50    0.35
  -3  -8   3    0.33    0.20
   3  -8  -3    0.59    0.20
   3  -8  -3    0.47    0.48
  -3   8   3    0.29    0.24
  -3   8   3    0.40    0.28
  -3   8   3    1.03    0.59
   3   8  -3    0.07    0.09
  -3   8   3    0.25    0.36
   3   8  -3    0.11    0.11
   3   8  -3    0.26    0.21
   3   8  -3    0.21    0.17
   3   8  -3   -0.35    0.34
   3   8  -3    0.21    0.24
   2  -8  -3    2.55    0.36
   2  -8  -3    2.57    0.52
   2  -8  -3    1.77    0.35
  -2  -8   3    2.60    0.28
   2  -8  -3    2.16    0.34
  -2  -8   3    2.17    0.27
  -2  -8   3    2.32    0.38
   2  -8  -3    2.35    0.43
  -2  -8   3    1.94    0.27
   2  -8  -3    2.47    0.38
  -2   8   3    2.67    0.49
  -2   8   3    1.98    0.31
   2   8  -3    2.22    0.40
   2   8  -3    2.59    0.24
   2   8  -3    2.08    0.24
  -2   8   3    2.70    0.40
  -2   8   3    1.91    0.33
   2   8  -3    2.31    0.23
   1  -8  -3    1.32    0.40
   1  -8  -3    1.07    0.28
  -1  -8   3    0.72    0.17
   1  -8  -3    0.68    0.26
   1  -8  -3    0.78    0.23
  -1  -8   3    0.95    0.19
  -1  -8   3    0.76    0.37
   1  -8  -3    0.82    0.24
  -1   8   3    0.67    0.23
  -1   8   3    0.73    0.22
   1   8  -3    0.90    0.20
  -1   8   3    0.71    0.26
  -1   8   3    1.07    0.42
   1   8  -3    0.72    0.14
   1   8  -3    0.84    0.19
   1   8  -3    1.21    0.21
   0  -8  -3   -0.05    0.24
   0  -8   3   -0.14    0.14
   0  -8   3    0.10    0.16
   0  -8   3   -0.24    0.24
   0  -8  -3   -0.24    0.19
   0  -8  -3    0.13    0.21
   0  -8   3   -0.19    0.19
   0  -8  -3   -0.06    0.19
   0  -8  -3   -0.32    0.16
   0   8  -3    0.12    0.17
   0   8   3   -0.25    0.23
   0   8   3   -0.04    0.22
   0   8   3    0.08    0.17
   0   8   3   -0.06    0.13
   0   8  -3   -0.03    0.15
   0   8  -3    0.21    0.27
   0   8  -3    0.03    0.18
   0   8  -3    0.00    0.05
  -1  -8  -3    0.33    0.21
   1  -8   3    0.36    0.25
  -1  -8  -3    0.28    0.20
  -1  -8  -3   -0.09    0.20
   1  -8   3    0.57    0.20
   1   8   3    0.45    0.25
  -1   8  -3    0.16    0.21
  -1   8  -3    0.47    0.15
  -1   8  -3    0.28    0.20
   1   8   3   -0.08    0.19
   1   8   3    0.07    0.33
  -1   8  -3    0.25    0.24
   1   8   3   -0.10    0.27
  -2  -8  -3   22.04    1.30
   2  -8   3   22.25    1.29
   2  -8   3   21.44    1.26
  -2  -8  -3   21.46    1.31
  -2  -8  -3   22.95    1.32
   2  -8   3   19.75    1.29
   2  -8   3   19.49    1.29
   2  -8   3   17.38    1.17
  -2   8  -3   20.80    1.27
   2   8   3   19.41    1.33
  -2   8  -3   19.99    1.27
   2   8   3   20.62    1.34
  -2   8  -3   20.31    1.27
   2   8   3   19.69    1.29
   3  -8   3   13.74    0.98
   3  -8   3   13.99    1.00
  -3  -8  -3   14.74    1.02
  -3  -8  -3   15.03    0.96
   3  -8   3   12.82    0.85
  -3  -8  -3   16.42    0.97
   3  -8   3   14.31    0.90
   3  -8   3   13.45    0.98
  -3  -8  -3   13.12    0.97
  -3   8  -3   14.20    1.02
  -3   8  -3   14.58    0.86
  -3   8  -3   13.81    0.94
   3   8   3   12.89    0.93
   3   8   3   13.44    0.97
   3   8   3   12.56    0.96
   3   8   3   15.11    1.01
  -3   8  -3   13.25    0.95
   4  -8   3    0.79    0.41
   4  -8   3    0.13    0.28
   4  -8   3    0.59    0.22
  -4  -8  -3    0.99    0.68
   4  -8   3    0.66    0.43
  -4  -8  -3    0.69    0.33
  -4  -8  -3    1.04    0.55
  -4  -8  -3    0.43    0.32
  -4  -8  -3    0.73    0.32
  -4  -8  -3    0.32    0.40
   4   8   3    0.90    0.25
  -4   8  -3   -0.04    0.36
   4   8   3    1.42    0.36
   4   8   3    0.35    0.28
   4   8   3    0.51    0.42
  -4   8  -3    0.52    0.28
  -4   8  -3    0.50    0.33
  -4   8  -3    0.77    0.24
  -5  -8  -3   -0.08    0.39
  -5  -8  -3   -0.28    0.28
   5  -8   3   -0.07    0.24
   5  -8   3    0.04    0.33
  -5  -8  -3   -0.23    0.37
  -5  -8  -3   -0.09    0.33
  -5  -8  -3   -0.06    0.41
  -5  -8  -3   -0.50    0.31
   5  -8   3    0.21    0.42
   5  -8   3    0.06    0.29
  -5   8  -3   -0.04    0.35
   5   8   3    0.53    0.35
  -5   8  -3    0.40    0.26
  -5   8  -3   -0.26    0.26
   5   8   3    0.00    0.45
  -5   8  -3   -0.26    0.44
   5   8   3    0.10    0.36
  -5   8  -3   -0.24    0.44
   5   8   3   -0.27    0.37
   6  -8   3    0.60    0.29
  -6  -8  -3    0.51    0.43
   6  -8   3    1.71    0.58
  -6  -8  -3    1.46    0.58
  -6  -8  -3    1.27    0.48
   6  -8   3    0.00    0.48
  -6  -8  -3    0.63    0.45
   6  -8   3    0.62    0.48
  -6  -8  -3    1.34    0.58
  -6   8  -3    1.52    0.45
  -6   8  -3    1.01    0.51
  -6   8  -3    1.08    0.65
   6   8   3   -0.46    0.69
   6   8   3    0.12    0.71
   6   8   3    0.66    0.43
  -6   8  -3    0.79    0.68
  -7  -8  -3    1.31    0.61
   7  -8   3    2.23    0.82
  -7  -8  -3    0.34    0.40
  -7  -8  -3    0.20    0.46
  -7   8  -3    0.22    0.95
   7   8   3   -0.77    1.05
  -7   8  -3    1.11    0.47
  -7  -9   3    0.94    0.53
   7  -9  -3   -0.36    1.03
  -7  -9   3    1.16    0.63
  -7   9   3    0.01    0.56
  -7   9   3    0.26    0.65
   6  -9  -3    0.59    1.07
  -6  -9   3    0.83    0.37
  -6  -9   3    0.93    0.41
  -6  -9   3    1.14    0.55
  -6   9   3   -0.63    0.53
   6   9  -3   -0.39    0.53
   6   9  -3    0.55    0.59
  -6   9   3   -0.10    0.40
  -6   9   3    0.34    0.52
   5  -9  -3    0.45    0.77
  -5  -9   3    0.80    0.36
   5  -9  -3    0.97    0.63
   5  -9  -3    0.81    0.63
   5  -9  -3    0.17    0.50
  -5  -9   3    0.03    0.42
   5   9  -3    0.44    0.36
  -5   9   3    1.28    0.84
  -5   9   3    0.70    0.34
   5   9  -3    0.50    0.45
  -5   9   3    0.16    0.52
  -5   9   3    1.05    0.47
   5   9  -3    0.26    0.45
  -4  -9   3    9.94    0.81
   4  -9  -3    9.87    0.84
   4  -9  -3   13.10    1.10
   4  -9  -3    9.73    0.80
  -4  -9   3    9.49    0.82
  -4  -9   3   12.47    1.13
  -4  -9   3   10.62    0.77
   4  -9  -3   10.91    0.90
   4  -9  -3   10.72    1.01
   4   9  -3   12.86    1.11
  -4   9   3   11.25    1.20
  -4   9   3   11.28    0.80
   4   9  -3   12.79    0.85
  -4   9   3   10.10    0.84
   4   9  -3   10.28    0.85
   4   9  -3    9.95    0.82
  -3  -9   3    4.33    0.75
   3  -9  -3    4.80    0.54
  -3  -9   3    4.97    0.48
   3  -9  -3    5.89    0.61
   3  -9  -3    5.47    0.67
  -3  -9   3    4.86    0.49
   3  -9  -3    3.76    0.51
   3  -9  -3    6.11    0.75
  -3  -9   3    4.05    0.42
   3   9  -3    4.59    0.61
   3   9  -3    4.49    0.50
  -3   9   3    4.12    0.45
  -3   9   3    5.24    0.57
   3   9  -3    3.86    0.31
  -3   9   3    4.36    0.69
  -3   9   3    4.09    0.50
   3   9  -3    5.49    0.44
   3   9  -3    4.59    0.45
   2  -9  -3    0.08    0.20
  -2  -9   3    0.26    0.21
  -2  -9   3    0.18    0.16
   2  -9  -3   -0.08    0.27
   2  -9  -3    0.33    0.31
   2  -9  -3    0.26    0.28
  -2  -9   3    0.13    0.43
  -2  -9   3    0.03    0.20
   2  -9  -3    0.47    0.28
   2  -9  -3    0.03    0.28
   2   9  -3   -0.13    0.27
   2   9  -3    0.04    0.12
  -2   9   3    0.15    0.26
   2   9  -3    0.11    0.15
  -2   9   3    0.25    0.23
   2   9  -3    0.40    0.19
  -2   9   3    0.33    0.23
   2   9  -3    0.09    0.18
  -2   9   3    0.41    0.47
   1  -9  -3    0.52    0.31
   1  -9  -3    0.73    0.28
   1  -9  -3    1.22    0.31
  -1  -9   3    0.97    0.19
   1  -9  -3    0.54    0.26
   1  -9  -3    0.96    0.28
  -1  -9   3    0.44    0.18
  -1  -9   3    0.94    0.20
  -1  -9   3    0.60    0.32
   1   9  -3    1.17    0.24
   1   9  -3    0.78    0.13
  -1   9   3    0.62    0.27
   1   9  -3    0.99    0.24
  -1   9   3    0.84    0.29
   1   9  -3    1.21    0.36
   1   9  -3    1.04    0.22
  -1   9   3    0.81    0.30
  -1   9   3    0.62    0.43
   0  -9   3    1.27    0.25
   0  -9  -3    1.56    0.30
   0  -9  -3    1.46    0.28
   0  -9   3    2.03    0.36
   0  -9   3    1.26    0.22
   0  -9  -3    1.57    0.32
   0  -9   3    1.98    0.30
   0  -9  -3    1.77    0.39
   0   9  -3    1.79    0.29
   0   9   3    2.00    0.39
   0   9   3    1.16    0.28
   0   9  -3    1.39    0.36
   0   9  -3    1.56    0.27
   0   9   3    1.33    0.31
   0   9   3    1.88    0.42
   0   9  -3    1.70    0.27
  -1  -9  -3    2.01    0.35
   1  -9   3    1.75    0.30
   1  -9   3    2.22    0.39
  -1  -9  -3    1.43    0.26
   1  -9   3    1.18    0.26
  -1  -9  -3    1.73    0.40
  -1  -9  -3    1.14    0.57
  -1  -9  -3    1.05    0.24
  -1   9  -3    1.75    0.27
   1   9   3    1.82    0.31
  -1   9  -3    1.90    0.38
   1   9   3    1.70    0.46
   1   9   3    1.19    0.27
  -1   9  -3    1.54    0.25
   1   9   3    1.07    0.30
   1   9   3    1.08    0.23
  -2  -9  -3   36.22    2.21
  -2  -9  -3   36.66    2.18
   2  -9   3   33.69    2.14
   2  -9   3   36.24    2.12
   2  -9   3   37.21    2.15
  -2  -9  -3   32.97    2.13
  -2  -9  -3   38.10    2.16
  -2  -9  -3   38.59    2.18
  -2   9  -3   41.39    2.14
  -2   9  -3   35.19    2.15
  -2   9  -3   33.19    2.12
   2   9   3   31.32    2.14
  -2   9  -3   35.93    2.14
   2   9   3   35.41    2.16
   3  -9   3    3.05    0.56
   3  -9   3    3.57    0.29
   3  -9   3    3.56    0.54
  -3  -9  -3    4.50    0.69
   3  -9   3    3.31    0.49
  -3  -9  -3    2.39    0.40
  -3  -9  -3    2.27    0.41
   3   9   3    2.94    0.42
   3   9   3    3.37    0.56
  -3   9  -3    2.72    0.43
  -3   9  -3    4.15    0.48
  -3   9  -3    2.58    0.45
   3   9   3    3.52    0.59
  -3   9  -3    3.38    0.29
   3   9   3    3.40    0.49
   4  -9   3    1.72    0.53
  -4  -9  -3    1.44    0.45
  -4  -9  -3    0.73    0.31
  -4  -9  -3    1.69    0.45
   4  -9   3    1.69    0.31
   4  -9   3    1.50    0.43
  -4  -9  -3    2.18    0.46
   4  -9   3    1.72    0.46
  -4  -9  -3    1.33    0.37
  -4  -9  -3    1.80    0.38
  -4   9  -3    1.63    0.43
  -4   9  -3    1.19    0.36
   4   9   3    1.24    0.50
  -4   9  -3    1.40    0.25
  -4   9  -3    1.56    0.32
   4   9   3    2.21    0.54
   4   9   3    2.19    0.41
  -4   9  -3    1.59    0.46
   4   9   3    1.36    0.48
   5  -9   3   -0.04    0.32
   5  -9   3   -0.40    0.53
  -5  -9  -3   -0.21    0.48
  -5  -9  -3    0.15    0.74
   5  -9   3   -0.55    0.62
   5  -9   3   -0.30    0.57
  -5  -9  -3   -0.14    0.36
   5  -9   3   -0.07    0.41
  -5  -9  -3   -0.56    0.59
  -5  -9  -3    0.27    0.32
  -5   9  -3   -0.18    0.49
  -5   9  -3    0.18    0.44
  -5   9  -3   -0.48    0.41
   5   9   3   -0.44    0.54
   5   9   3    0.14    0.49
   5   9   3    0.02    0.40
  -5   9  -3   -0.03    0.26
   5   9   3    0.41    0.41
  -5   9  -3    0.90    0.56
  -6  -9  -3    0.74    0.43
   6  -9   3    0.57    0.48
   6  -9   3    0.85    0.79
   6  -9   3    1.10    0.87
   6  -9   3    0.75    0.32
  -6  -9  -3    0.87    0.82
  -6  -9  -3    2.14    0.62
  -6  -9  -3    0.02    0.46
  -6  -9  -3    1.25    0.70
  -6  -9  -3    0.50    0.45
   6   9   3    1.25    0.49
  -6   9  -3    1.60    0.38
  -6   9  -3    0.73    0.55
   6   9   3    1.28    0.57
  -6   9  -3    0.64    0.29
   6   9   3    2.22    0.77
  -6   9  -3   -0.39    0.80
   7  -9   3    0.56    1.06
  -7  -9  -3    0.30    0.43
  -7  -9  -3    1.23    0.55
  -7  -9  -3    3.87    1.20
   7   9   3    0.07    0.69
  -7   9  -3    0.87    0.55
  -7 -10   3    1.39    0.64
  -7 -10   3    0.76    0.57
   7 -10  -3    0.25    1.03
  -7  10   3    0.03    0.72
  -7  10   3    0.20    0.63
  -6 -10   3    1.23    0.44
   6 -10  -3    1.24    0.82
  -6 -10   3    0.08    0.60
   6 -10  -3    1.02    0.74
  -6 -10   3    1.24    0.50
  -6  10   3    0.96    0.60
  -6  10   3    1.61    0.87
  -6  10   3    0.50    0.38
  -5 -10   3    4.93    0.54
   5 -10  -3    3.99    0.76
  -5 -10   3    5.88    0.65
   5 -10  -3    3.77    0.54
  -5  10   3    4.43    0.80
  -5  10   3    4.79    0.68
  -5  10   3    3.90    0.70
   5  10  -3    4.01    0.74
   4 -10  -3   51.02    2.78
  -4 -10   3   43.05    2.69
  -4 -10   3   44.59    2.69
   4 -10  -3   46.42    2.76
  -4 -10   3   41.18    2.66
   4 -10  -3   48.98    2.90
  -4 -10   3   48.94    2.91
   4 -10  -3   44.86    2.73
   4  10  -3   49.05    2.68
   4  10  -3   45.36    2.78
  -4  10   3   43.86    2.77
  -4  10   3   44.96    2.73
  -4  10   3   43.85    2.84
   4  10  -3   45.52    2.71
   4  10  -3   41.55    2.70
  -4  10   3   45.12    2.83
  -3 -10   3    0.15    0.26
  -3 -10   3    0.69    0.54
  -3 -10   3    0.46    0.26
   3 -10  -3    0.93    0.29
   3 -10  -3   -0.03    0.22
   3 -10  -3    0.67    0.46
   3 -10  -3    0.33    0.29
   3 -10  -3    0.72    0.44
  -3 -10   3    0.41    0.22
   3  10  -3    0.17    0.32
  -3  10   3    0.53    0.36
   3  10  -3    0.11    0.20
  -3  10   3    0.38    0.28
   3  10  -3    0.27    0.30
  -3  10   3    0.67    0.27
   3  10  -3    0.15    0.32
  -3  10   3    0.55    0.63
  -2 -10   3    2.49    0.49
  -2 -10   3    3.41    0.38
   2 -10  -3    3.19    0.58
   2 -10  -3    3.40    0.53
   2 -10  -3    2.75    0.44
  -2 -10   3    4.55    0.45
   2 -10  -3    3.53    0.66
  -2 -10   3    3.42    0.35
   2 -10  -3    3.51    0.44
  -2  10   3    4.06    0.53
   2  10  -3    3.41    0.60
   2  10  -3    3.60    0.41
  -2  10   3    4.39    0.76
   2  10  -3    3.85    0.32
   2  10  -3    4.08    0.33
   2  10  -3    4.30    0.37
  -2  10   3    2.98    0.45
  -2  10   3    3.70    0.50
   1 -10  -3    0.90    0.29
   1 -10  -3    1.59    0.33
  -1 -10   3    1.82    0.44
   1 -10  -3    1.75    0.36
  -1 -10   3    1.92    0.31
  -1 -10   3    1.40    0.28
  -1 -10   3    1.40    0.25
   1 -10  -3    1.49    0.49
   1 -10  -3    1.59    0.39
  -1  10   3    0.88    0.41
  -1  10   3    1.63    0.39
   1  10  -3    1.68    0.17
  -1  10   3    1.50    0.34
   1  10  -3    1.61    0.26
   1  10  -3    1.48    0.27
   1  10  -3    1.42    0.29
   1  10  -3    1.77    0.42
  -1  10   3    1.63    0.36
   0 -10  -3   11.11    0.81
   0 -10   3   10.98    0.73
   0 -10  -3   11.42    0.87
   0 -10  -3   10.34    0.86
   0 -10   3   11.13    0.74
   0 -10  -3   11.44    0.81
   0 -10   3   10.07    0.75
   0 -10  -3   11.22    0.82
   0 -10   3   11.09    0.85
   0  10  -3   10.33    0.74
   0  10   3   10.45    0.80
   0  10   3   10.01    0.78
   0  10   3   11.16    0.93
   0  10  -3   11.02    0.76
   0  10  -3   10.65    0.77
   0  10   3   11.23    0.84
   0  10  -3   12.23    0.75
  -1 -10  -3    1.21    0.29
  -1 -10  -3    0.73    0.34
   1 -10   3    1.89    0.33
  -1 -10  -3    1.61    0.34
  -1 -10  -3    1.31    0.38
  -1 -10  -3    1.36    0.34
   1 -10   3    1.57    0.29
   1 -10   3    1.36    0.30
  -1  10  -3    1.60    0.33
   1  10   3    1.17    0.33
   1  10   3    1.40    0.29
   1  10   3    1.24    0.29
   1  10   3    1.15    0.35
   1  10   3    1.04    0.33
  -1  10  -3    1.22    0.30
   2 -10   3   65.38    4.13
   2 -10   3   72.43    4.12
  -2 -10  -3   71.41    4.14
  -2 -10  -3   70.23    4.17
  -2 -10  -3   77.34    4.16
   2 -10   3   76.36    4.16
  -2 -10  -3   74.11    4.16
  -2 -10  -3   74.82    4.20
   2  10   3   69.28    4.16
  -2  10  -3   68.65    4.13
  -2  10  -3   81.23    4.13
   2  10   3   71.27    4.17
  -2  10  -3   71.51    4.15
   2  10   3   63.16    4.14
  -2  10  -3   68.77    4.14
  -3 -10  -3   27.39    1.52
  -3 -10  -3   25.47    1.52
   3 -10   3   24.28    1.54
  -3 -10  -3   23.50    1.59
  -3 -10  -3   22.91    1.48
   3 -10   3   25.37    1.50
   3 -10   3   20.18    1.35
   3 -10   3   21.61    1.47
  -3 -10  -3   25.67    1.55
   3 -10   3   24.38    1.47
   3  10   3   25.69    1.59
  -3  10  -3   23.72    1.51
  -3  10  -3   24.49    1.57
   3  10   3   22.81    1.60
  -3  10  -3   21.26    1.35
  -3  10  -3   23.70    1.54
   3  10   3   21.51    1.48
   3  10   3   22.12    1.51
   4 -10   3    2.14    0.41
  -4 -10  -3    0.77    0.58
   4 -10   3    1.38    0.27
  -4 -10  -3    1.64    0.54
   4 -10   3    1.32    0.38
  -4 -10  -3    0.85    0.29
   4 -10   3    1.41    0.28
   4 -10   3    1.88    0.39
  -4 -10  -3    1.57    0.46
  -4 -10  -3    1.51    0.42
  -4 -10  -3    0.51    0.58
   4  10   3    1.57    0.61
  -4  10  -3    1.78    0.45
   4  10   3    1.31    0.44
  -4  10  -3    1.29    0.45
   4  10   3    1.69    0.46
   4  10   3    2.26    0.45
  -4  10  -3    1.94    0.49
  -4  10  -3    0.98    0.44
  -5 -10  -3   -0.08    0.32
  -5 -10  -3    0.11    0.33
  -5 -10  -3   -0.32    0.35
   5 -10   3   -0.62    0.58
   5 -10   3   -0.35    0.60
  -5 -10  -3   -0.23    0.31
   5 -10   3   -0.19    0.38
  -5 -10  -3    0.19    0.49
   5 -10   3   -0.11    0.32
  -5 -10  -3   -0.83    0.51
   5  10   3   -0.25    0.65
  -5  10  -3   -0.30    0.27
   5  10   3   -0.87    0.66
  -5  10  -3   -0.14    0.35
  -5  10  -3    0.25    0.42
  -6 -10  -3   -0.45    1.02
   6 -10   3   -0.51    0.42
  -6 -10  -3   -0.42    0.64
   6 -10   3    0.06    0.40
   6 -10   3    0.42    0.43
  -6 -10  -3    0.69    0.61
  -6 -10  -3    0.10    0.40
  -6 -10  -3   -1.48    0.88
   6  10   3    1.03    0.61
  -6  10  -3   -0.05    0.60
  -6  10  -3   -0.19    0.38
  -6  10  -3   -0.98    0.64
   6  10   3    2.15    0.98
   6  10   3    0.42    0.85
   7 -10   3    1.63    0.62
  -7 -10  -3    2.56    1.32
  -7 -10  -3    2.55    0.62
  -7  10  -3    3.08    0.60
  -7  10  -3    2.15    0.72
   7  10   3    4.07    1.07
  -7 -11   3    1.23    0.59
  -7  11   3    0.19    0.55
  -7  11   3   -0.35    0.78
  -6 -11   3    0.80    0.40
  -6 -11   3    0.36    0.46
  -6 -11   3    0.54    0.47
   6 -11  -3    0.81    1.15
  -6  11   3   -0.10    0.60
  -6  11   3    0.63    0.64
  -5 -11   3    0.26    0.44
  -5 -11   3    1.06    0.52
  -5 -11   3   -0.48    0.54
   5 -11  -3    0.35    0.60
   5 -11  -3   -1.18    0.64
   5 -11  -3    1.27    0.46
   5 -11  -3    0.21    0.92
  -5  11   3   -0.15    0.35
   5  11  -3   -0.29    0.51
   5  11  -3   -0.24    0.47
  -5  11   3   -0.61    0.44
  -5  11   3    0.23    0.53
  -4 -11   3   18.97    1.36
  -4 -11   3   19.42    1.28
   4 -11  -3   20.45    1.42
   4 -11  -3   22.02    1.43
  -4 -11   3   18.13    1.32
   4 -11  -3   18.57    1.36
   4 -11  -3   19.97    1.47
  -4 -11   3   21.82    1.48
   4 -11  -3   22.21    1.48
   4  11  -3   18.15    1.32
  -4  11   3   18.81    1.40
   4  11  -3   22.27    1.35
   4  11  -3   19.73    1.41
  -4  11   3   20.35    1.44
  -4  11   3   22.06    1.70
   4  11  -3   18.05    1.33
  -4  11   3   19.79    1.37
   3 -11  -3    7.58    0.75
  -3 -11   3    9.24    0.76
  -3 -11   3    9.97    0.85
  -3 -11   3    8.88    0.74
   3 -11  -3   10.04    0.79
   3 -11  -3    9.07    1.02
   3 -11  -3   10.27    0.88
  -3 -11   3    8.43    0.66
   3 -11  -3    9.28    0.83
   3 -11  -3    9.60    0.93
   3  11  -3   10.16    0.70
  -3  11   3    9.13    0.76
   3  11  -3    8.73    0.96
   3  11  -3    8.50    0.71
   3  11  -3    8.32    0.72
  -3  11   3    9.18    0.79
  -3  11   3    8.62    0.83
  -3  11   3    8.52    1.16
  -2 -11   3    0.10    0.26
   2 -11  -3    0.02    0.41
   2 -11  -3    0.02    0.23
  -2 -11   3    0.20    0.17
   2 -11  -3    0.07    0.35
   2 -11  -3    0.18    0.29
   2 -11  -3   -0.12    0.33
   2 -11  -3   -0.45    0.36
  -2 -11   3   -0.10    0.50
  -2 -11   3   -0.12    0.19
  -2  11   3   -0.10    0.39
   2  11  -3   -0.20    0.22
  -2  11   3    0.34    0.38
  -2  11   3    0.45    0.22
   2  11  -3    0.36    0.26
   2  11  -3    0.06    0.51
   2  11  -3    0.00    0.14
  -2  11   3    0.02    0.23
   1 -11  -3    0.06    0.33
  -1 -11   3    0.13    0.25
  -1 -11   3   -0.08    0.18
   1 -11  -3    0.27    0.37
  -1 -11   3    0.13    0.45
   1 -11  -3    0.29    0.34
  -1 -11   3   -0.11    0.20
   1 -11  -3    0.05    0.25
   1  11  -3   -0.01    0.19
  -1  11   3   -0.09    0.35
   1  11  -3    0.35    0.42
  -1  11   3   -0.36    0.33
  -1  11   3   -0.54    0.52
   1  11  -3    0.00    0.24
   1  11  -3    0.06    0.25
   1  11  -3   -0.14    0.10
   0 -11  -3    0.08    0.27
   0 -11  -3   -0.41    0.29
   0 -11   3   -0.16    0.23
   0 -11   3    0.02    0.21
   0 -11  -3   -0.33    0.42
   0 -11  -3   -0.57    0.37
   0 -11   3   -0.11    0.43
   0 -11  -3   -0.39    0.24
   0 -11   3   -0.30    0.37
   0  11  -3   -0.07    0.21
   0  11   3   -0.02    0.23
   0  11   3   -0.10    0.31
   0  11  -3    0.09    0.41
   0  11  -3    0.09    0.24
   0  11   3    0.07    0.51
   1 -11   3   14.02    0.91
  -1 -11  -3   12.47    1.02
  -1 -11  -3   13.10    0.94
  -1 -11  -3   12.95    0.96
   1 -11   3   14.45    0.96
  -1 -11  -3   13.18    0.94
   1 -11   3   12.33    0.94
   1 -11   3   12.71    0.91
  -1 -11  -3   13.36    0.93
  -1  11  -3   13.49    0.96
  -1  11  -3   14.69    0.88
   1  11   3   12.04    0.91
   1  11   3   12.89    0.98
   1  11   3   12.89    0.94
   1  11   3   11.62    0.96
  -1  11  -3   13.58    0.91
  -1  11  -3   13.98    1.00
  -2 -11  -3   52.26    2.93
  -2 -11  -3   50.22    2.95
  -2 -11  -3   49.22    2.89
   2 -11   3   43.79    2.85
  -2 -11  -3   48.76    2.94
   2 -11   3   51.86    2.90
  -2 -11  -3   53.32    2.90
   2 -11   3   49.50    2.86
   2  11   3   44.42    2.86
  -2  11  -3   47.48    2.88
   2  11   3   41.79    2.87
  -2  11  -3   47.81    2.90
  -2  11  -3   47.79    2.88
   2  11   3   46.58    2.91
   2  11   3   47.25    2.91
  -2  11  -3   55.20    2.88
   2  11   3   52.03    2.93
  -3 -11  -3   -0.24    0.37
   3 -11   3    0.46    0.39
   3 -11   3   -0.02    0.22
  -3 -11  -3    0.62    0.50
  -3 -11  -3    0.20    0.26
   3 -11   3    0.52    0.43
  -3 -11  -3    0.65    0.29
   3 -11   3    0.22    0.36
  -3 -11  -3   -0.22    0.29
  -3  11  -3    0.40    0.43
   3  11   3   -0.17    0.37
   3  11   3    0.60    0.45
  -3  11  -3   -0.50    0.31
   3  11   3    0.60    0.22
   3  11   3    0.25    0.27
  -3  11  -3    0.47    0.43
  -3  11  -3   -0.36    0.30
   4 -11   3    0.05    0.44
  -4 -11  -3   -0.11    0.36
   4 -11   3    0.04    0.18
  -4 -11  -3   -0.01    0.47
   4 -11   3    0.23    0.48
  -4 -11  -3    0.11    0.42
   4 -11   3    0.34    0.25
  -4 -11  -3    0.04    0.39
  -4 -11  -3   -0.70    0.64
   4 -11   3    0.14    0.37
   4  11   3    0.31    0.39
   4  11   3   -0.44    0.50
   4  11   3   -0.43    0.59
   4  11   3    0.11    0.37
  -4  11  -3    0.58    0.51
  -4  11  -3    0.51    0.46
  -4  11  -3    0.14    0.18
  -4  11  -3    0.24    0.28
  -4  11  -3    0.91    0.57
  -5 -11  -3    0.07    0.70
   5 -11   3   -0.16    0.41
  -5 -11  -3   -0.41    0.73
  -5 -11  -3    0.42    0.66
   5 -11   3   -0.45    0.41
  -5 -11  -3    0.04    0.39
  -5 -11  -3    0.02    0.40
  -5 -11  -3   -0.19    0.30
   5 -11   3    0.15    0.29
  -5  11  -3    1.12    0.49
  -5  11  -3   -0.23    0.55
   5  11   3    0.42    0.74
  -5  11  -3   -0.18    0.28
   5  11   3   -0.62    0.42
  -5  11  -3    1.83    1.01
  -5  11  -3   -1.17    0.65
   5  11   3   -0.16    0.33
   6 -11   3   -0.36    0.51
  -6 -11  -3    0.52    0.62
   6 -11   3    0.45    0.73
  -6 -11  -3   -0.30    0.64
  -6 -11  -3   -0.32    0.65
  -6 -11  -3   -0.05    0.91
   6  11   3   -0.03    0.78
  -6  11  -3    0.54    0.38
   6  11   3    0.50    0.58
   7 -11   3   -0.28    1.11
  -7 -11  -3   -2.24    1.27
  -6 -12   3    0.82    0.48
  -6 -12   3    0.03    0.67
   6 -12  -3    0.77    0.72
  -6  12   3    0.77    0.72
  -6  12   3    0.48    0.46
   5 -12  -3    0.46    0.41
  -5 -12   3   -0.36    0.85
  -5 -12   3    0.73    0.39
  -5 -12   3    0.75    0.49
  -5 -12   3    0.37    0.39
   5  12  -3    0.89    0.38
  -5  12   3    1.24    0.63
  -5  12   3    0.60    0.59
  -5  12   3    0.41    0.74
   5  12  -3   -0.08    0.56
   4 -12  -3    2.25    0.86
  -4 -12   3    1.28    0.36
   4 -12  -3    0.96    0.35
  -4 -12   3    0.63    0.43
   4 -12  -3    0.49    0.63
  -4  12   3    1.03    0.39
   4  12  -3    0.16    0.43
  -4  12   3    1.40    0.62
  -4  12   3    0.48    1.15
  -4  12   3    0.76    0.34
   3 -12  -3    1.79    0.61
  -3 -12   3    2.95    0.82
  -3 -12   3    1.63    0.34
   3 -12  -3    1.88    0.49
   3 -12  -3    1.80    0.52
   3 -12  -3    2.78    0.48
   3 -12  -3    1.69    0.37
   3 -12  -3    2.30    0.58
  -3  12   3    1.46    0.70
   3  12  -3    2.02    0.36
   3  12  -3    1.91    0.64
  -3  12   3    2.06    0.50
   3  12  -3    1.80    0.45
   3  12  -3    1.44    0.19
  -3  12   3    1.69    0.52
   3  12  -3    1.38    0.31
  -2 -12   3   -0.47    0.27
  -2 -12   3    0.06    0.17
   2 -12  -3   -0.29    0.45
   2 -12  -3   -0.80    0.57
   2 -12  -3   -0.11    0.29
   2 -12  -3   -0.12    0.46
  -2 -12   3    0.48    0.97
  -2 -12   3   -0.04    0.27
   2 -12  -3   -0.10    0.30
   2 -12  -3    0.15    0.39
  -2  12   3    0.08    0.23
   2  12  -3    0.12    0.56
  -2  12   3   -0.59    0.37
   2  12  -3    0.07    0.15
   2  12  -3   -0.26    0.31
  -2  12   3   -0.30    0.41
   2  12  -3    0.02    0.17
   2  12  -3    0.19    0.30
   1 -12  -3    0.19    0.26
  -1 -12   3   -0.12    0.46
   1 -12  -3    0.66    0.38
  -1 -12   3    0.46    0.25
   1 -12  -3   -0.08    0.52
  -1 -12   3    0.59    0.25
   1 -12  -3    0.50    0.26
  -1 -12   3    0.23    0.29
   1 -12  -3    0.80    0.34
   1  12  -3   -0.08    0.19
   1  12  -3    0.47    0.31
  -1  12   3    0.41    0.41
   1  12  -3    0.22    0.29
  -1  12   3    0.17    0.23
   1  12  -3    0.35    0.22
  -1  12   3    0.14    0.39
  -1  12   3    0.34    0.67
   0 -12   3   -0.31    0.21
   0 -12   3    0.16    0.30
   0 -12  -3   -0.19    0.28
   0  12   3   -0.14    0.30
   0  12  -3   -0.29    0.18
   0  12  -3   -0.07    0.28
   0  12   3   -0.14    0.33
   0  12   3   -0.29    0.52
   0  12  -3    0.05    0.19
   1 -12   3    7.92    0.63
   1 -12   3    8.19    0.65
  -1 -12  -3    7.06    0.62
  -1 -12  -3    8.39    0.64
  -1 -12  -3    7.86    0.66
   1 -12   3    7.95    0.67
   1 -12   3    6.77    0.66
  -1 -12  -3    8.45    0.69
  -1 -12  -3    7.50    0.82
   1  12   3    6.20    0.63
  -1  12  -3    7.07    0.69
   1  12   3    7.77    0.67
   1  12   3    7.41    0.74
   1  12   3    6.37    0.69
  -1  12  -3    6.98    0.66
  -1  12  -3    7.32    0.64
   1  12   3    6.17    0.72
  -2 -12  -3    0.56    0.47
   2 -12   3    0.06    0.21
  -2 -12  -3    0.56    0.35
   2 -12   3    0.49    0.28
  -2 -12  -3    0.90    0.46
  -2 -12  -3    0.64    0.47
   2 -12   3    0.29    0.26
   2  12   3   -0.09    0.28
   2  12   3    0.98    0.41
  -2  12  -3    0.51    0.34
   2  12   3    0.71    0.37
  -2  12  -3    0.48    0.51
  -2  12  -3    0.11    0.27
   2  12   3    0.21    0.33
   3 -12   3    2.81    0.55
  -3 -12  -3    1.79    0.59
   3 -12   3    1.89    0.40
   3 -12   3    2.62    0.45
  -3 -12  -3    3.50    0.66
  -3 -12  -3    3.38    0.45
  -3 -12  -3    2.40    0.59
  -3 -12  -3    2.53    0.45
   3 -12   3    2.32    0.51
  -3  12  -3    2.09    0.48
   3  12   3    1.75    0.55
   3  12   3    2.28    0.63
  -3  12  -3    3.48    0.67
   3  12   3    2.92    0.56
  -3  12  -3    2.72    0.52
  -3  12  -3    2.96    0.44
   3  12   3    2.09    0.59
  -4 -12  -3    0.09    0.48
   4 -12   3    0.84    0.57
   4 -12   3   -0.04    0.63
  -4 -12  -3    0.91    0.44
  -4 -12  -3   -0.57    0.45
  -4 -12  -3   -0.04    0.50
   4 -12   3    0.47    0.41
[truncated: 257,120 more chars]
